# Supplementary material for: Targeted protein degradation by KLHDC2 ligands identified by high-throughput screening
Source: eLife. 2025 Jun 16;14:RP106844. doi: 10.7554/eLife.106844 (PMC12169847; doi:10.7554/eLife.106844)
Supplement: Figure 1—source data 1. [file elife-106844-fig1-data1.xlsx]

## Sheet: Figure 1B
nM	FP signal
100	255
50	207
25	123
12.5	45.7
6.25	18
0	-31.4

## Sheet: Figure 1C
nM	KLHDC2			KEAP1
10000	-119.804	-108.173	-131.954	23.2	24.6	20.5
3333.33	-121.804	-114.173	-126.954	5.973	25.4	17.9
1111.11	-118.804	-103.173	-115.954	28.1	26.2	29.4
370.37	-112.804	-102.173	-108.954	9.19	15	21.1
123.457	-82.7042	-72.3734	-87.9543	17.4	19.9	23.3
41.1523	-59.4042	-52.2734	-64.9543	11.7	16.8	20.9
13.7174	-32.2042	-24.3734	-33.0543	19.3	26.9	15.7
4.57247	-27.0042	-14.8734	-25.0543	21.5	8.638	21.4
1.52416	-7.40421	-3.17342	-7.75425	16.7	33.5	12.3
0.508053	-8.30421	-1.77342	1.74575	8.833	18.5	25.2
0.169351	-16.7042	-10.3734	-10.1543	19.2	20.1	20.7

## Sheet: Figure 1D
-peptide	+peptide
170	56
184	48
191	44
186	45
192	49
177	52
180	51
180	54
192	55
200	52
189	50
206	65
202	57
203	60
209	65
178	53
183	60
205	61
197	52
176	64
	56
	56
	49
	60
	58
	59
	59
	62
	62
	58
	55
	63

## Sheet: Figure 1E
- Native Peptide										+Native Peptide (1uM)
78.1	82.5	73.2	75	84.2	93.8	79.2	82.3	79.5	98.3	-109	-118	-116	-116	-117	-122	-108	-119	-115	-123

## Sheet: Figure 1F
Compound ID	Screening compound value	Hit compound value
CBR-050-319-537-7		-23.7585
CBR-050-320-511-6	-17.7844
CBR-050-319-882-1	-17.7741
CBR-050-320-664-2	-13.8169
CBR-050-319-480-7	-10.344
CBR-050-319-645-0	-5.87473
CBR-050-319-990-4	-3.7967
CBR-050-320-680-2	-2.80265
CBR-050-320-038-2	-2.19234
CBR-050-319-777-1	-0.69808
CBR-050-319-898-9	0.180721
CBR-050-320-222-0	5.8467
CBR-050-323-082-8	5.95877
CBR-050-320-732-7	7.66168
CBR-050-319-992-6		-45.5604
CBR-050-319-926-6	1.69446
CBR-050-320-205-9	-15.0605
CBR-050-319-929-9	-1.31701
CBR-050-320-352-9	12.0558
CBR-050-320-666-4	-1.76458
CBR-050-320-747-4		-39.4457
CBR-050-319-897-8	2.94358
CBR-050-320-556-9	-3.23938
CBR-050-320-125-0	0.887093
CBR-050-319-492-1	1.44605
CBR-050-320-462-4	8.37468
CBR-050-320-124-9	-0.394453
CBR-050-319-445-4	5.67455
CBR-050-319-913-1	-8.15779
CBR-050-320-634-6	-3.91555
CBR-050-320-157-8	-7.46885
CBR-050-319-676-7	3.5358
CBR-050-320-300-7	2.99525
CBR-050-320-348-3	0.83049
CBR-050-320-587-6	1.59878
CBR-050-320-035-9	-1.66578
CBR-050-320-098-4	1.0056
CBR-050-320-716-7	-0.703823
CBR-050-320-589-8	2.05895
CBR-050-319-744-2	8.5435
CBR-050-320-173-8	-0.243952
CBR-050-319-648-3	1.35483
CBR-050-319-724-8	-0.319621
CBR-050-320-486-2	-0.811935
CBR-050-320-590-1	1.85393
CBR-050-320-602-8	-0.0329091
CBR-050-320-588-7	3.13741
CBR-050-319-730-6	-5.04798
CBR-050-320-555-8		-31.2816
CBR-050-319-479-4	1244
CBR-050-320-350-7	-4.96731
CBR-050-319-745-3	-10.6792
CBR-050-319-867-2	-6.95291
CBR-050-320-595-6	-11.0306
CBR-050-319-818-3	-5.95458
CBR-050-320-051-9	2.87923
CBR-050-319-864-9		-58.4111
CBR-050-319-878-5	0.533043
CBR-050-319-865-0	-5.37907
CBR-050-319-692-7	-4.75987
CBR-050-320-077-9	-2.08462
CBR-050-319-849-0		-100.229
CBR-050-319-554-8	-6.62043
CBR-050-319-633-6	0.380037
CBR-050-320-005-3	-10.3385
CBR-050-320-363-2	-3.17477
CBR-050-320-277-5	8.38119
CBR-050-320-490-8	-4.97686
CBR-050-320-635-7	2.37284
CBR-050-320-369-8	-0.938425
CBR-050-320-159-0	4.26419
CBR-050-320-021-3	8.72777
CBR-050-319-949-3	7.3877
CBR-050-319-415-8		-22.6037
CBR-050-320-524-1	-14.482
CBR-050-320-540-1	2.93858
CBR-050-320-622-2	1.70885
CBR-050-320-400-0	9.63572
CBR-050-320-383-6	2.77509
CBR-050-320-207-1	-4.52564
CBR-050-319-738-4	1.03564
CBR-050-320-145-4	1.951
CBR-050-319-848-9	2.95754
CBR-050-319-716-8	-9.41803
CBR-050-320-667-5	-1.82479
CBR-050-320-346-1	5.33976
CBR-050-320-669-7	-4.62496
CBR-050-319-678-9	-2.93112
CBR-050-320-745-2	-2.76422
CBR-050-320-219-5	1.47809
CBR-050-320-315-4	-4.4979
CBR-050-319-431-8	1.82203
CBR-050-319-681-4	10.6112
CBR-050-319-444-3	0.0305654
CBR-050-319-593-5	5.83144
CBR-050-320-343-8	-4.20301
CBR-050-320-478-2	-1.46424
CBR-050-319-570-8	-1.63226
CBR-050-320-637-9	3.79413
CBR-050-320-395-0	-1.0653
CBR-050-320-304-1	2.82488
CBR-050-319-768-0	3.6316
CBR-050-320-396-1	5.37193
CBR-050-320-337-0	0.45435
CBR-050-319-516-2	7.16921
CBR-050-320-183-0	-4.24394
CBR-050-320-380-3	-12.2884
CBR-050-319-975-5	2.12909
CBR-050-320-138-5	-0.764864
CBR-050-319-478-3	7.14412
CBR-050-320-347-2	12.5455
CBR-050-319-912-0	-4.26522
CBR-050-319-760-2	10.5349
CBR-050-319-646-1	-16.1704
CBR-050-320-236-6	-3.50668
CBR-050-320-399-4	-0.164394
CBR-050-319-991-5		-35.6492
CBR-050-319-780-6	-1.52524
CBR-050-319-737-3	0.817605
CBR-050-320-521-8		-20.2439
CBR-050-319-985-7	-0.537838
CBR-050-320-744-1	-12.6183
CBR-050-319-505-9	-10.1788
CBR-050-323-064-6	-3.00028
CBR-050-320-121-6	-3.40812
CBR-050-319-824-1	5.51057
CBR-050-319-626-7	-1.67487
CBR-050-320-320-1	-1.12698
CBR-050-320-491-9	2.69188
CBR-050-320-294-6	-0.25259
CBR-050-319-471-6	-4.76491
CBR-050-319-470-5	-9.16812
CBR-050-320-458-8	0.857165
CBR-050-320-698-2	-8.86087
CBR-050-319-691-6	2.2222
CBR-050-319-874-1		-34.5829
CBR-050-319-915-3	1.71433
CBR-050-320-474-8	-11.902
CBR-050-320-499-7		-25.505
CBR-050-320-570-7		-38.3395
CBR-050-320-623-3	0.177957
CBR-050-319-416-9	-2.36318
CBR-050-320-209-3	-2.26033
CBR-050-319-699-4	-4.02589
CBR-050-319-686-9	-1.34005
CBR-001-175-661-9	0.788207
CBR-050-320-234-4	-2.75141
CBR-050-319-489-6	10.6279
CBR-050-319-684-7	6.64791
CBR-050-320-259-3	2.68216
CBR-050-320-171-6	1.92817
CBR-050-319-838-7	2.39964
CBR-050-319-577-5	-16.0542
CBR-050-320-714-5	-14.2637
CBR-050-319-785-1	-7.56668
CBR-050-320-057-5	10.3856
CBR-050-320-235-5	0.0022572
CBR-050-320-753-2	2.23719
CBR-050-320-208-2	-1.91741
CBR-050-320-112-5	6.2794
CBR-050-320-106-7	-3.14318
CBR-050-319-854-7		-40.2466
CBR-050-323-073-7	4.23131
CBR-050-320-186-3	6.68387
CBR-050-319-473-8	-3.76723
CBR-050-320-748-5	6.78065
CBR-050-319-301-9	-13.2525
CBR-050-320-330-3	6.0373
CBR-050-319-285-6	1.13475
CBR-050-320-134-1	-17.2325
CBR-050-320-512-7	-5.79806
CBR-050-319-980-2	3.02014
CBR-050-320-750-9	3.23719
CBR-050-320-485-1	2.2874
CBR-050-319-557-1	-8.44982
CBR-050-320-123-8	3.77557
CBR-050-319-839-8	12.4227
CBR-050-319-750-0	6.24739
CBR-050-320-754-3	0.898922
CBR-050-320-154-5	-9.28482
CBR-050-319-957-3	-3.39053
CBR-050-320-574-1	-4.24389
CBR-050-320-002-0	8.36993
CBR-050-319-237-8	5.21329
CBR-050-320-633-5	-9.7521
CBR-050-320-024-6	-6.29801
CBR-050-320-690-4	1.40258
CBR-050-319-931-3	-5.77588
CBR-050-320-122-7	6.95731
CBR-050-320-076-8	-4.85239
CBR-050-320-374-5	-0.149488
CBR-050-320-136-3	-6.0201
CBR-050-318-061-8	-3.10933
CBR-050-320-708-7	5.4152
CBR-050-319-892-3	-0.470249
CBR-050-319-754-4	-3.63224
CBR-050-319-876-3	-7.97877
CBR-001-176-190-3	2.50739
CBR-001-175-022-4	-4.59721
CBR-050-319-659-6	0.900982
CBR-050-320-724-7	-2.77114
CBR-050-319-348-4	1.50233
CBR-050-320-011-1	3.28581
CBR-001-175-886-4	-5.582
CBR-050-318-504-4	0.681214
CBR-050-318-788-0	5.7356
CBR-050-319-551-5	-1.25691
CBR-050-319-463-6	0.525482
CBR-050-316-646-9	-1.11668
CBR-050-319-205-0	-2.09702
CBR-050-323-065-7	-3.64229
CBR-050-320-197-6	2.46772
CBR-050-319-827-4	-9.47316
CBR-050-320-583-2	1.28974
CBR-050-318-348-0	11.2403
CBR-050-319-675-6	-11.171
CBR-050-320-582-1	0.31925
CBR-050-320-638-0	3.70374
CBR-050-318-323-1	2.8532
CBR-050-320-108-9	2.37337
CBR-050-319-440-9	8.65791
CBR-050-319-721-5	-9.04239
CBR-050-319-459-0	-10.0721
CBR-050-319-627-8	3.49912
CBR-050-319-707-7	9.52407
CBR-050-320-092-8	-9.0007
CBR-050-319-972-2	11.6874
CBR-050-319-866-1	-1.86942
CBR-050-319-188-6		-405.938
CBR-050-318-187-1	2.73983
CBR-050-320-651-7	9.08703
CBR-050-319-955-1	-7.78804
CBR-050-319-029-2		-33.9688
CBR-001-175-390-5	3.04505
CBR-050-319-349-5	9.77851
CBR-001-175-629-9	-5.63357
CBR-050-319-472-7	0.482591
CBR-050-320-402-2	-1.82262
CBR-050-319-751-1	-0.331377
CBR-050-320-172-7	-5.83639
CBR-050-320-285-5	6.00377
CBR-050-320-299-1	-5.73908
CBR-050-319-510-6	-0.590848
CBR-050-320-175-0		-39.044
CBR-001-175-662-0	3.25319
CBR-050-320-229-7	-10.3641
CBR-050-320-152-3	-5.45893
CBR-050-319-599-1	-0.050742
CBR-050-320-575-2	-7.2404
CBR-001-176-094-4	3.14167
CBR-050-319-567-3	-17.7733
CBR-050-319-704-4	-1.74084
CBR-050-320-554-7	-0.388055
CBR-050-319-888-7	-3.40717
CBR-050-320-642-6	2.48071
CBR-050-319-755-5		-38.0039
CBR-050-318-361-7	2.0563
CBR-050-320-042-8		-4084.77
CBR-050-319-908-4	20.0189
CBR-050-320-413-5	-3.80581
CBR-050-320-389-2	6.24747
CBR-050-317-934-8	0.511189
CBR-050-319-417-0	3.59383
CBR-050-320-353-0		-20.3678
CBR-050-320-536-5	-11.3582
CBR-050-320-354-1	-7.5262
CBR-050-319-774-8	-12.2303
CBR-050-319-800-3	4.81349
CBR-001-175-533-2	-7.25508
CBR-050-319-674-5	-7.85946
CBR-050-319-884-3	2.16638
CBR-050-320-023-5	10.5918
CBR-050-319-840-1		-36.1507
CBR-001-176-142-5	0.463802
CBR-050-319-978-8	2.93728
CBR-050-316-916-2	-2.51996
CBR-001-175-407-7	-3.18555
CBR-050-319-863-8	4.30047
CBR-050-323-069-1	5.30949
CBR-050-319-644-9	2.32644
CBR-050-319-448-7	-6.13717
CBR-050-318-047-0	0.811917
CBR-050-319-137-5	-0.445872
CBR-050-318-748-2	-5.07298
CBR-001-175-198-7	-12.8334
CBR-050-318-872-5	3.33031
CBR-050-319-722-6	-7.82487
CBR-050-323-075-9	6.51821
CBR-050-320-000-8	7.81819
CBR-050-320-538-7	4.96643
CBR-050-323-011-3	-7.9026
CBR-001-175-263-9	11.53
CBR-001-175-040-6	-13.2434
CBR-001-175-645-9	-3.62796
CBR-001-175-344-9	18.4346
CBR-050-320-258-2	-0.271126
CBR-050-320-601-7	-16.9546
CBR-050-319-560-6	10.1664
CBR-050-317-858-3	-2.80946
CBR-050-320-461-3	7.88845
CBR-050-319-937-9		-18.8628
CBR-050-320-442-0	1.14479
CBR-050-319-988-0	17.5924
CBR-050-318-265-8	-12.0444
CBR-050-320-617-5	9.59384
CBR-050-319-739-5	3.86817
CBR-050-320-187-4	3.80822
CBR-050-316-999-1	1.01052
CBR-050-323-087-3		-21.5533
CBR-050-319-970-0	-1.35757
CBR-050-319-673-4	1.69943
CBR-050-319-893-4	12.3832
CBR-050-320-696-0	-0.451918
CBR-001-175-279-7	-4.21731
CBR-050-317-017-0	-4.96706
CBR-050-316-716-6	11.8944
CBR-050-319-617-6	4.5839
CBR-050-319-808-1	9.66196
CBR-001-176-014-8	11.0516
CBR-050-318-905-7	6.35559
CBR-050-320-522-9	12.5625
CBR-050-319-558-2	-2.73927
CBR-050-318-398-0	14.467
CBR-050-319-447-6	-1.11148
CBR-050-319-027-0	2129.78
CBR-050-317-487-6		-25.2865
CBR-050-320-694-8	4.3257
CBR-050-319-535-5	-7.17859
CBR-050-318-066-3	-8.039
CBR-050-317-091-0	-7.16248
CBR-050-319-427-2	-13.762
CBR-050-318-012-9	-3.88972
CBR-050-317-015-8	7.69471
CBR-050-318-191-7	3.64401
CBR-050-317-734-2		-21.3656
CBR-050-320-658-4		-69.2862
CBR-050-317-870-9	-0.613844
CBR-050-320-212-8		-46.0508
CBR-050-323-080-6	-10.8591
CBR-050-320-309-6	-4.75598
CBR-050-317-922-4	-8.47341
CBR-050-317-926-8	-6.8623
CBR-050-318-189-3	26.991
CBR-050-319-503-7	2.43798
CBR-001-175-296-8	-3.73996
CBR-001-175-551-4	3.70018
CBR-050-317-255-2	-0.207161
CBR-050-323-067-9	1.09487
CBR-050-320-085-9	0.365588
CBR-050-320-298-0	4.9768
CBR-050-320-457-7	-15.7095
CBR-001-175-422-6	-0.999334
CBR-050-320-194-3	-0.713333
CBR-050-319-413-6	-16.5716
CBR-001-175-535-4	-2.58334
CBR-001-175-038-2	3.36262
CBR-050-318-253-4	-8.48818
CBR-050-319-256-1	-1.1909
CBR-050-317-995-1	-1.59407
CBR-050-320-338-1	-8.23931
CBR-050-319-399-5	-7.68815
CBR-050-316-773-5	6.39358
CBR-050-320-712-3	2.62921
CBR-050-318-462-1	-1.5731
CBR-050-317-919-9	2.57649
CBR-050-317-684-9	-6.73552
CBR-050-319-775-9	2.3012
CBR-050-320-282-2	-5.02767
CBR-050-319-883-2	2.52135
CBR-050-320-728-1	-1.23236
CBR-050-320-017-7	6.39465
CBR-050-319-564-0	-0.00537128
CBR-050-319-586-6	-0.547945
CBR-050-319-771-5	1.15235
CBR-050-319-934-6	-5.29149
CBR-050-318-267-0	1.48295
CBR-050-319-641-6	-0.707786
CBR-050-320-361-0	1.51988
CBR-050-320-628-8	-0.0164323
CBR-050-319-628-9	2.37536
CBR-050-320-411-3		-94.3437
CBR-050-320-018-8	15.4196
CBR-050-319-524-2	-4.45418
CBR-050-319-173-9	1785.32
CBR-050-318-475-6	583.913
CBR-050-319-383-7	10.3103
CBR-050-318-471-2	1.45353
CBR-050-319-015-6	4.03883
CBR-050-317-094-3	-1.9921
CBR-050-320-662-0		-28.3592
CBR-001-175-134-1	-1.54729
CBR-050-318-077-6	7.14382
CBR-050-317-080-7	-3.48297
CBR-050-318-493-8	8.49751
CBR-050-319-530-0	16.4298
CBR-050-319-891-2	403.557
CBR-050-319-954-0	-6.83228
CBR-050-319-712-4	-0.871457
CBR-050-319-905-1	-1.53314
CBR-050-317-377-1	3.5593
CBR-050-320-695-9	3.31295
CBR-050-318-983-1	-0.684195
CBR-050-320-489-5	2.96946
CBR-050-319-615-4	3.70604
CBR-050-320-314-3	1.62274
CBR-050-318-525-9	4.70855
CBR-001-175-808-0	-5.17271
CBR-050-320-143-2	-10.3319
CBR-050-319-224-3	3.95518
CBR-050-318-897-4	0.83254
CBR-050-316-840-9	1.53432
CBR-050-318-744-8	2.34326
CBR-050-319-483-0	-2.11108
CBR-050-317-266-5	2.12124
CBR-050-320-672-2	1.085
CBR-050-319-610-9	6.38778
CBR-001-175-856-8	3.25993
CBR-050-317-316-8		-55.6926
CBR-050-319-620-1	-4.75977
CBR-050-318-810-1	-0.757049
CBR-050-319-806-9	-6.85499
CBR-050-319-651-8	-11.4961
CBR-001-175-950-5	-5.73266
CBR-050-318-933-1	2.07042
CBR-050-319-379-1	-6.33125
CBR-050-318-474-5	1.56534
CBR-050-318-728-8	6.7923
CBR-050-320-454-4	-1.41102
CBR-050-320-604-0	4.12444
CBR-050-319-000-9	1.71396
CBR-050-319-690-5	5.51206
CBR-050-317-939-3	1.42376
CBR-050-316-662-9	-5.92395
CBR-050-319-581-1	3.53306
CBR-050-319-713-5	6.48877
CBR-050-318-167-7	4.85276
CBR-050-318-329-7	1.25848
CBR-050-319-752-2	16.5383
CBR-050-319-113-7	0.310949
CBR-050-319-291-4	3.57014
CBR-050-319-051-0	1.08568
CBR-050-318-840-7	-6.80644
CBR-001-175-440-8		-21.862
CBR-050-318-330-0		-963.118
CBR-050-317-250-7		-2716.93
CBR-050-319-556-0	22.8717
CBR-050-318-108-6	7.30692
CBR-050-318-099-2	-4.20808
CBR-001-175-119-2	8.23847
CBR-050-320-426-0	-1.5738
CBR-050-319-436-3	4.48726
CBR-050-319-240-3	3.68736
CBR-050-318-619-4	3316.82
CBR-050-317-590-4	-3.54966
CBR-050-317-076-1	4.16704
CBR-001-175-024-6	4.92652
CBR-050-317-864-1	2.92871
CBR-050-319-881-0	3.37694
CBR-050-320-279-7	-4.22395
CBR-050-320-719-0	-11.3244
CBR-050-320-456-6	-5.59189
CBR-050-318-886-1	-1.40854
CBR-050-320-264-0	-3.04803
CBR-001-175-118-1		-31.6457
CBR-050-318-420-1	787.31
CBR-050-318-011-8	14.1687
CBR-050-318-615-0	9.30816
CBR-050-323-028-2	-2.8053
CBR-050-319-203-8	-11.483
CBR-050-319-395-1	34.3511
CBR-050-317-760-4	-0.398559
CBR-050-317-578-8	-1.45815
CBR-050-317-253-0		-22.4263
CBR-050-318-171-3	-10.2701
CBR-050-317-130-0	-4.08684
CBR-050-317-888-9	8.37845
CBR-050-316-776-8	17.5899
CBR-050-318-940-0	-7.61561
CBR-050-317-848-1	45.9068
CBR-050-319-816-1	-1.04333
CBR-050-318-664-9	0.635547
CBR-050-318-822-5	-5.64625
CBR-001-176-143-6		-518.58
CBR-050-320-048-4	12.9285
CBR-050-319-798-6	-1.87582
CBR-050-318-763-1	9.30694
CBR-050-320-345-0	2.83093
CBR-050-316-794-0	-1.85051
CBR-050-319-221-0	0.590818
CBR-050-317-046-5	-2.49654
CBR-050-318-855-4	-1.61095
CBR-001-175-998-1	-3.03518
CBR-001-175-997-0		-652.981
CBR-050-317-383-9		-3722.42
CBR-050-318-093-6	-6.05521
CBR-050-318-443-8	4.35122
CBR-050-318-625-2	396.174
CBR-050-317-503-9		-30.1869
CBR-050-320-060-0	-8.99767
CBR-050-317-049-8	-4.29589
CBR-050-319-718-0	-7.52943
CBR-050-316-805-6	28.7432
CBR-050-320-453-3	-11.8191
CBR-050-318-696-7		-32.0541
CBR-050-316-906-0	-10.0378
CBR-050-320-646-0	6.3844
CBR-050-317-860-7	-2.22266
CBR-050-317-783-1	5.8396
CBR-001-174-975-0	1.92846
CBR-050-320-019-9	3.0938
CBR-050-319-696-1	2.34354
CBR-050-319-733-9	0.742225
CBR-050-317-011-4	-1.35934
CBR-050-318-807-6	-0.146673
CBR-050-316-971-9	-8.07457
CBR-050-318-943-3	0.221574
CBR-050-323-081-7	-9.7411
CBR-050-320-184-1	8.86902
CBR-050-318-523-7	0.748519
CBR-050-320-626-6	-5.18392
CBR-050-320-692-6	-2.16674
CBR-050-318-141-7	-1.11801
CBR-050-317-525-5	0.875252
CBR-050-317-332-8	-0.933399
CBR-050-316-953-7	1.92029
CBR-050-318-155-3	-0.467908
CBR-001-175-517-2	19.9598
CBR-050-320-523-0	6.78794
CBR-050-319-877-4	14.0366
CBR-050-318-670-7	-5.92641
CBR-050-316-969-5	0.551021
CBR-050-317-288-1	9.30936
CBR-001-175-631-3	4.41845
CBR-050-317-619-0	5.67478
CBR-050-318-585-1	8.97909
CBR-050-317-505-1	5.45464
CBR-050-318-600-3	2.03584
CBR-050-317-345-3	-0.471025
CBR-050-317-081-8	4.51689
CBR-050-319-668-7	20.7968
CBR-050-320-423-7	2.76139
CBR-050-317-237-0	3.67231
CBR-050-318-272-7	-3.70185
CBR-050-323-084-0	-10.0447
CBR-050-319-351-9	-1.44495
CBR-050-318-903-5	-7.35902
CBR-050-320-139-6	-1.46766
CBR-050-316-985-5	6.8431
CBR-001-175-183-0	-9.56501
CBR-050-319-252-7	-12.2464
CBR-050-318-349-1	-3.50226
CBR-050-318-219-2		-778.43
CBR-050-320-362-1	-0.690612
CBR-050-320-030-4	-6.65516
CBR-050-320-725-8	6.11798
CBR-050-319-061-2	-6.68154
CBR-050-317-871-0	-0.522633
CBR-001-175-007-5	-4.28224
CBR-050-319-783-9	-0.110579
CBR-050-319-411-4	-7.00732
CBR-050-320-610-8		-47.6039
CBR-050-319-939-1	8.84776
CBR-050-319-093-0	2.48232
CBR-050-323-037-3	-2.04385
CBR-050-316-966-2	-8.48313
CBR-050-318-539-5	1.79298
CBR-050-316-853-4		-26.0205
CBR-001-175-182-9	-12.0079
CBR-050-317-287-0	3.76846
CBR-001-175-149-8	-4.25934
CBR-001-175-805-7	4.93918
CBR-050-316-888-5	-2.12393
CBR-050-317-286-9	-7.15401
CBR-050-317-318-0	0.625296
CBR-050-317-352-2	-1.73984
CBR-050-318-888-3	0.985262
CBR-050-319-803-6	-9.18487
CBR-050-323-071-5	-6.52775
CBR-050-318-843-0	-4.82058
CBR-050-317-474-1	-1.97807
CBR-050-320-283-3	1.13798
CBR-050-320-114-7	4.87512
CBR-050-316-808-9	-7.76344
CBR-050-317-364-6	3.19857
CBR-050-318-256-7	14.1658
CBR-050-318-425-6	-0.635955
CBR-050-319-269-6	1.03114
CBR-050-320-759-8	6.58182
CBR-050-317-139-9	3.59312
CBR-050-320-073-5	10.9385
CBR-050-316-632-3	14.8377
CBR-050-320-565-0	653.713
CBR-050-319-046-3	4.00689
CBR-050-316-825-0	7.06141
CBR-050-320-155-6	10.2951
CBR-050-320-169-2	33.8827
CBR-050-319-045-2	-9.67672
CBR-050-319-380-4	7.03003
CBR-050-320-496-4	-3.19136
CBR-050-319-085-0	-9.35966
CBR-050-317-300-0	-3.67373
CBR-050-318-444-9	2.64982
CBR-050-318-564-6	5.66829
CBR-050-318-278-3	2.60773
CBR-001-158-714-7	6.60148
CBR-050-320-435-1	7.50397
CBR-001-176-061-5	4.9547
CBR-050-318-064-1	-17.5974
CBR-050-318-262-5	4.86277
CBR-050-318-109-7	0.837825
CBR-050-319-709-9	7.17161
CBR-050-319-987-9	-0.963054
CBR-050-318-813-4	8.26692
CBR-050-317-506-2	14.1236
CBR-050-319-910-8	6.24739
CBR-050-317-411-6	22.3934
CBR-050-317-356-6	-3.87791
CBR-050-319-552-6	-6.84911
CBR-050-323-013-5	-1.92281
CBR-001-175-581-0	1.46428
CBR-050-317-285-8	-5.06101
CBR-050-319-545-7	-3.98616
CBR-050-317-675-8	1.57307
CBR-050-317-690-7	-4.54695
CBR-001-175-550-3	3.66922
CBR-050-320-407-7	-4.74248
CBR-050-317-219-8	-0.529835
CBR-050-316-744-0	4.83751
CBR-050-319-243-6	0.0423228
CBR-050-318-745-9	6.65491
CBR-050-318-951-3	1.56909
CBR-050-318-654-7	-0.856459
CBR-050-318-331-1	0.104943
CBR-050-317-966-6	-3.20287
CBR-050-317-061-4	11.3083
CBR-050-317-730-8	7.36748
CBR-050-318-803-2	3.93916
CBR-050-319-587-7	-3.95171
CBR-001-175-151-2	-12.7168
CBR-050-317-296-1	-6.19406
CBR-050-320-061-1	3.35831
CBR-050-318-827-0	-5.07565
CBR-050-318-488-1	9.77277
CBR-050-318-966-0	7.45523
CBR-050-316-904-8	0.191487
CBR-050-317-261-0	2.83164
CBR-050-319-761-3	1.76864
CBR-050-319-428-3	-8.53737
CBR-001-175-648-2	-0.905518
CBR-050-318-989-7	-8.2116
CBR-050-317-304-4	-4.49487
CBR-050-317-529-9	5.91065
CBR-050-318-186-0	-2.01978
CBR-050-317-368-0	-5.84973
CBR-050-317-098-7	-5.87991
CBR-001-175-854-6	1.43868
CBR-001-175-807-9	2.45949
CBR-050-317-281-4	0.768481
CBR-050-316-799-5	-4.01369
CBR-050-318-505-5	5.32302
CBR-050-318-767-5	-1.31486
CBR-050-319-680-3	0.683055
CBR-050-320-170-5	545.869
CBR-050-317-786-4	-1.873
CBR-050-318-543-1	7.84529
CBR-050-320-096-2	0.0779285
CBR-050-317-859-4	1.66098
CBR-050-318-300-4	10.0113
CBR-050-318-628-5	-2.25261
CBR-050-318-682-1	-7.27412
CBR-050-317-875-4	3.72581
CBR-001-175-615-3	0.993812
CBR-050-320-506-9	1.69125
CBR-050-323-092-0	4.89068
CBR-050-317-106-0	4.85689
CBR-050-318-168-8	3.58921
CBR-050-319-219-6	0.405823
CBR-050-318-172-4	-0.200725
CBR-050-317-735-3	6.12794
CBR-050-318-747-1	5.14901
CBR-050-319-337-1	5.21034
CBR-050-319-160-4	-1.75076
CBR-050-319-094-1	-2.55436
CBR-050-320-532-1	-9.84899
CBR-050-318-740-4	9.88369
CBR-050-320-427-1	0.840146
CBR-050-317-891-4	8.87249
CBR-050-318-671-8	-7.48306
CBR-050-318-264-7	1.96812
CBR-050-318-402-9	-3.35999
CBR-050-319-320-2	1.40413
CBR-050-316-669-6	-0.679783
CBR-050-318-410-9	0.207832
CBR-050-318-778-8	6.00404
CBR-050-320-675-5	17.5076
CBR-050-318-602-5	5.94593
CBR-050-319-549-1	-7.90562
CBR-001-175-054-2	4.58052
CBR-001-175-406-6	-13.9252
CBR-050-317-193-5	9.59852
CBR-050-317-270-1	-7.2296
CBR-050-318-867-8	-0.726363
CBR-050-319-747-5	-0.550588
CBR-050-318-298-7	2.97223
CBR-050-318-225-0	7.82996
CBR-050-318-143-9	-6.37905
CBR-050-318-643-4	7.05861
CBR-050-317-147-9	-4.58261
CBR-050-317-096-5	20.4268
CBR-050-320-552-5	6.1233
CBR-050-317-079-4	-0.188415
CBR-050-320-504-7	-0.220054
CBR-050-316-761-1	1.05522
CBR-050-317-691-8	-2.48029
CBR-050-318-761-9	7.62865
CBR-050-317-059-0	-0.188415
CBR-050-319-346-2	-4.01051
CBR-050-317-861-8	2.75851
CBR-050-317-638-3	-3.67145
CBR-050-318-087-8	-0.220822
CBR-050-318-150-8	-5.05355
CBR-050-317-918-8	8.81303
CBR-050-317-262-1	-4.23327
CBR-050-319-035-0		-19.5126
CBR-050-320-004-2	2.07929
CBR-050-320-269-5	0.543565
CBR-050-319-386-0	-2.02916
CBR-001-176-029-5	6.27598
CBR-001-158-778-3	8.80414
CBR-050-317-099-8	9.29934
CBR-050-319-598-0	12.7811
CBR-050-318-094-7	3.24854
CBR-050-319-019-0	2.48456
CBR-050-318-119-9	4.79406
CBR-050-318-651-4	7.44084
CBR-050-317-843-6	0.70341
CBR-050-320-010-0	0.848497
CBR-050-317-252-9	4.66322
CBR-050-318-787-9	-2.38279
CBR-050-319-174-0	0.775326
CBR-050-319-670-1	6.73878
CBR-050-317-896-9	-0.143889
CBR-050-317-359-9		-22.0994
CBR-050-317-176-4	-7.13908
CBR-050-316-645-8	12.1739
CBR-050-319-940-4	-2.93966
CBR-050-323-057-7	5.99152
CBR-050-317-315-7	-4.91051
CBR-050-318-697-8	9.63106
CBR-050-317-570-0	4.57941
CBR-050-320-292-4	5.93847
CBR-050-318-542-0	4.49106
CBR-050-319-861-6	-4.45314
CBR-050-317-616-7	6.59084
CBR-001-159-263-5	-4.4942
CBR-050-320-614-2	-11.7515
CBR-050-318-846-3	0.0761625
CBR-001-175-503-6	6.80109
CBR-050-319-273-2	-2.43436
CBR-050-318-163-3	4.26793
CBR-001-175-679-9	8.77486
CBR-050-320-126-1	1.36281
CBR-050-320-591-2	1.73474
CBR-050-319-708-8	5.82802
CBR-050-316-827-2	6.31488
CBR-050-318-442-7	3.78596
CBR-050-318-140-6	10.5231
CBR-001-175-567-2	3.18675
CBR-050-316-818-1	-7.82454
CBR-050-319-909-5	6.87896
CBR-050-318-045-8	2.39207
CBR-050-317-491-2	-3.73592
CBR-050-317-519-7	6.34771
CBR-050-316-970-8	-4.10416
CBR-001-158-619-9	2.97744
CBR-050-317-633-8	5.01621
CBR-050-320-631-3	2.2612
CBR-001-175-773-6	2.33223
CBR-050-317-653-2	-8.81758
CBR-050-318-758-4	-2.1864
CBR-050-318-195-1	1.68155
CBR-050-319-007-6	1.49648
CBR-050-318-960-4	-0.167311
CBR-050-318-427-8	-2.65508
CBR-050-319-482-9	-9.75084
CBR-050-319-596-8	0.533411
CBR-050-323-023-7	3.58793
CBR-050-319-469-2	4.75939
CBR-050-318-319-5	2.16768
CBR-050-318-217-0	8.80147
CBR-050-317-568-6	-0.405728
CBR-050-319-941-5	2.84243
CBR-050-317-453-6	-3.57207
CBR-050-316-699-2	3.69729
CBR-050-317-527-7	2.68047
CBR-050-317-668-9	-0.420746
CBR-050-316-724-6	-10.7765
CBR-050-319-121-7		-18.0624
CBR-050-317-548-2		-35.5378
CBR-050-318-453-0	-14.4413
CBR-050-318-829-2	0.576284
CBR-050-318-970-6	3.18969
CBR-050-317-920-2		-25.409
CBR-050-319-049-6	1.5013
CBR-050-316-717-7	3.01394
CBR-050-318-877-0	-1.40133
CBR-050-318-606-9	4.875
CBR-001-175-565-0	3.68287
CBR-050-319-550-4		-20.2353
CBR-050-317-831-2	-2.37021
CBR-050-320-063-3	-2.33743
CBR-050-317-795-5	-3.81366
CBR-050-317-435-4	-2.69696
CBR-001-176-205-3		-22.3872
CBR-050-318-409-6	-9.38877
CBR-050-317-040-9	10.1287
CBR-050-319-397-3	-3.67527
CBR-050-319-533-3	-8.46604
CBR-050-318-297-6	13.8996
CBR-050-316-923-1	4.47497
CBR-050-317-515-3	-6.71755
CBR-050-320-758-7	-4.03035
CBR-050-320-119-2	5.85952
CBR-050-320-295-7	-9.62612
CBR-050-318-864-5	-15.8489
CBR-050-316-885-2	4.47497
CBR-050-317-758-0	-5.98135
CBR-050-318-931-9	0.192503
CBR-050-317-972-4		-38.6975
CBR-050-319-125-1	2.11067
CBR-050-317-747-7	-2.33743
CBR-050-318-927-3	2.51874
CBR-050-319-239-0	-2.08368
CBR-050-319-832-1	-5.01312
CBR-050-320-392-7	-2.46804
CBR-050-319-156-8	-16.2161
CBR-050-319-187-5	2.4329
CBR-050-318-749-3	-5.74414
CBR-050-318-972-8	-17.9667
CBR-050-317-923-5	3.49461
CBR-050-318-934-2		-18.0474
CBR-050-320-274-2	-0.00453188
CBR-050-318-285-2	13.7167
CBR-050-319-279-8	-13.1062
CBR-050-317-392-0	-7.31288
CBR-050-317-485-4	20.2797
CBR-050-317-609-8	13.0022
CBR-050-316-910-6	12.7574
CBR-050-316-634-5	0.345627
CBR-050-317-996-2	-6.72564
CBR-050-317-317-9	1.19746
CBR-050-320-226-4	5.60528
CBR-050-318-084-5	1.96737
CBR-050-316-934-4	-3.30505
CBR-050-318-502-2	-11.582
CBR-050-318-869-0	-14.1613
CBR-050-319-129-5		-18.2421
CBR-050-316-879-4	-9.54308
CBR-050-319-731-7		-29.0943
CBR-050-317-323-7	3.38693
CBR-050-318-151-9	-12.4767
CBR-001-173-269-7	-9.65143
CBR-050-316-809-0	17.3292
CBR-050-318-973-9	5.63343
CBR-050-320-624-4	-13.6624
CBR-001-178-147-8	-2.19039
CBR-001-178-483-1	-2.53026
CBR-001-185-532-6		-34.9889
CBR-050-320-616-4	6.3904
CBR-050-318-762-0	-5.38455
CBR-050-317-310-2		-26.4186
CBR-050-318-266-9	9.14423
CBR-050-319-171-7		-22.167
CBR-050-316-769-9	2.99914
CBR-050-319-366-6	0.338258
CBR-050-316-762-2	-3.72827
CBR-050-319-194-4	-3.9399
CBR-050-320-305-2	-7.17184
CBR-050-320-645-9	2.60891
CBR-050-320-202-6	-4.8188
CBR-050-319-519-5	14.2025
CBR-050-317-205-2	-2.62522
CBR-050-318-002-7	8.74349
CBR-050-317-226-7	2.82452
CBR-050-318-765-3	-15.69
CBR-050-318-380-0	-5.61567
CBR-050-318-853-2	-15.1864
CBR-050-318-574-8	-16.7114
CBR-050-323-026-0	-10.309
CBR-050-317-809-4	-7.17209
CBR-050-323-000-0	12.0701
CBR-050-319-308-6	18.3567
CBR-050-316-816-9	4.73481
CBR-050-318-162-2	1.61178
CBR-050-316-709-7	-4.45539
CBR-001-176-208-6		-19.5368
CBR-001-184-439-6	-8.41854
CBR-050-316-811-4	2.83937
CBR-050-316-859-0	-3.89825
CBR-050-318-977-3	1.6761
CBR-001-187-399-7	9.83957
CBR-001-180-758-2	-0.999586
CBR-050-318-115-5	0.637893
CBR-050-316-913-9	-0.379409
CBR-050-317-409-2	-3.87914
CBR-050-320-585-4	2.80911
CBR-050-317-513-1	-0.454614
CBR-050-317-012-5	6.33199
CBR-050-318-572-6	3.38038
CBR-001-184-462-5	3.22333
CBR-050-319-355-3	-8.82343
CBR-001-184-511-7	1.50461
CBR-050-317-052-3	-8.8828
CBR-050-319-180-8	6.57535
CBR-050-317-625-8	5.74396
CBR-050-318-170-2	6.57152
CBR-001-186-370-0	-0.407137
CBR-050-319-265-2	10.6302
CBR-050-316-954-8	6.06439
CBR-050-317-776-2	7.34621
CBR-050-317-184-4	4.99406
CBR-050-316-694-7	-0.405701
CBR-050-318-078-7	2.29122
CBR-050-317-374-8	-3.61292
CBR-050-318-517-9	0.541317
CBR-050-317-959-7	-0.376942
CBR-001-178-612-2	3.22594
CBR-001-178-419-3	0.302831
CBR-001-178-306-5	0.500753
CBR-001-184-810-5	-1.87613
CBR-050-319-782-8	-3.13078
CBR-050-317-407-0	6.68365
CBR-001-176-095-5	-2.15355
CBR-050-320-103-4	-1.47036
CBR-050-319-222-1	-0.378694
CBR-001-176-000-2	-11.8172
CBR-050-317-898-1	3.64596
CBR-050-317-580-2	4.0683
CBR-050-319-132-0	0.580459
CBR-050-317-415-0	1.31889
CBR-001-176-801-7	2.39144
CBR-001-171-400-4	3.97366
CBR-050-318-473-4	4.23461
CBR-050-318-153-1	-1.23798
CBR-050-318-236-3		-39.9565
CBR-050-317-331-7	-6.65206
CBR-050-316-983-3	6.21086
CBR-050-317-968-8	6.21262
CBR-050-323-034-0	-17.3508
CBR-050-319-230-1	-1.97153
CBR-050-316-696-9	1.42861
CBR-050-318-441-6	2.65601
CBR-050-319-112-6	3.10376
CBR-050-318-126-8	4.12193
CBR-050-319-134-2	1.32185
CBR-050-318-571-5	0.805538
CBR-050-318-770-0	-5.91975
CBR-050-318-538-4	1.57012
CBR-050-318-428-9	4.56736
CBR-050-317-461-6	-0.138854
CBR-050-323-046-4	-9.542
CBR-050-317-290-5	-0.102441
CBR-050-316-924-2	-0.0436786
CBR-050-318-125-7	-2.73193
CBR-001-172-437-1	10.0263
CBR-001-181-174-8	11.1395
CBR-001-159-451-7	1.19623
CBR-001-184-445-4	-4.20707
CBR-001-184-756-6	-6.83302
CBR-050-318-226-1	-2.11135
CBR-050-319-312-2	-14.1136
CBR-050-320-406-6	1.43504
CBR-050-318-416-5	7.39844
CBR-050-317-010-3	6.28987
CBR-050-317-867-4		-23.6972
CBR-050-319-127-3	-8.88172
CBR-050-317-200-7	-9.94059
CBR-050-318-873-6	-2.19465
CBR-050-319-228-7	19.0541
CBR-001-186-139-5	26.0701
CBR-050-317-212-1	13.0133
CBR-001-184-723-7	24.3973
CBR-050-318-164-4	-1.18821
CBR-001-184-458-9	27.2992
CBR-050-316-746-2	25.1679
CBR-050-318-486-9	35.1322
CBR-050-316-852-3	7.96486
CBR-050-317-910-0	-4.44675
CBR-050-318-553-3	31.8818
CBR-050-317-223-4	17.6965
CBR-050-318-757-3	-17.9586
CBR-050-319-531-1	-9.26146
CBR-001-185-861-0	-3.31124
CBR-050-317-829-8	-2.76129
CBR-050-317-009-0	-0.52868
CBR-050-317-935-9	2.77837
CBR-050-317-753-5	7.27616
CBR-050-318-792-6	3.18231
CBR-050-317-511-9	30.9187
CBR-050-317-893-6	-0.556245
CBR-050-319-185-3	1.55249
CBR-001-186-115-7	7.21438
CBR-050-319-158-0	8.98904
CBR-050-317-512-0	-3.56104
CBR-050-316-771-3	-3.49481
CBR-050-316-775-7	3.83524
CBR-050-320-177-2	3.5511
CBR-001-184-136-4	-11.3482
CBR-050-319-062-3	-5.91798
CBR-050-319-282-3	1.19249
CBR-001-185-728-6	-2.81491
CBR-001-184-820-7	5.77599
CBR-001-172-022-2	3.49952
CBR-050-320-448-6		-33.815
CBR-001-187-790-0	2.27759
CBR-050-316-677-6	-3.11197
CBR-050-316-655-0	-13.0498
CBR-050-319-314-4	-8.73716
CBR-050-318-655-8	-2.53022
CBR-050-316-948-0	4.44823
CBR-001-158-794-3	-0.956795
CBR-050-319-869-4	-7.64628
CBR-050-319-079-2	-4.16331
CBR-050-316-728-0	-0.785024
CBR-050-318-614-9	4.19413
CBR-050-320-599-0	-1.55863
CBR-050-316-782-6	3.81054
CBR-000-895-935-1	4.96836
CBR-001-712-997-4	-11.1885
CBR-050-319-216-3	2.09835
CBR-050-317-483-2	8.85837
CBR-050-317-623-6	-13.225
CBR-050-317-703-5	-0.512025
CBR-050-319-150-2	5.25124
CBR-050-318-367-3	-2.6043
CBR-050-318-701-7	-14.7221
CBR-050-320-059-7	1.02564
CBR-050-320-600-6	-1.56271
CBR-001-175-563-8		-21.9174
CBR-001-175-646-0	6.35929
CBR-050-317-344-2	-7.83798
CBR-050-318-638-7	1.72926
CBR-050-317-126-4		-35.8738
CBR-050-320-216-2	1.69253
CBR-050-320-102-3	4.99093
CBR-050-317-306-6	-1.48035
CBR-050-318-004-9	2.01281
CBR-001-184-117-1	-8.78126
CBR-050-323-088-4	-2.96953
CBR-050-317-887-8	-4.64569
CBR-050-317-166-2	9.9007
CBR-050-316-679-8	5.66329
CBR-050-316-685-6	-4.72687
CBR-001-184-504-8	7.84791
CBR-050-318-161-1	7.33606
CBR-050-317-263-2	-5.12748
CBR-050-318-039-0	-8.69591
CBR-050-317-133-3	5.18059
CBR-050-317-689-4	-1.35245
CBR-001-177-540-9	-2.45969
CBR-001-158-570-9	7.33042
CBR-050-316-994-6	6.77758
CBR-050-317-605-4	7.46312
CBR-050-318-284-1	4.97526
CBR-050-316-884-1	-3.46563
CBR-001-176-158-3	0.468549
CBR-050-318-245-4	3.66629
CBR-050-317-733-1	-1.62449
CBR-001-175-408-8	-3.16787
CBR-050-317-701-3	-0.062731
CBR-001-176-013-7	3.99763
CBR-050-318-837-2	-5.31153
CBR-001-185-084-3	-1.38498
CBR-001-158-474-0	0.361569
CBR-050-316-721-3	2.12299
CBR-050-319-255-0	1.60095
CBR-050-319-331-5	9.29767
CBR-050-317-182-2	2.69635
CBR-050-318-221-6		-42.091
CBR-050-317-828-7	-2.93279
CBR-050-319-207-2		-584.123
CBR-001-160-307-9	8.6657
CBR-050-318-999-9	4.58183
CBR-050-317-606-5	6.42492
CBR-001-185-883-6	-0.607424
CBR-050-319-182-0	-7.13827
CBR-050-318-408-5	2.34422
CBR-050-320-586-5	9.69058
CBR-050-317-840-3	2.00836
CBR-050-317-530-2	0.0531099
CBR-050-317-565-3	2.30181
CBR-050-318-509-9	2.17015
CBR-050-320-385-8	-0.357344
CBR-050-317-650-9	0.33811
CBR-050-317-069-2	9.78673
CBR-050-317-903-1	4.34911
CBR-050-311-473-6	29.1183
CBR-050-317-156-0	16.5979
CBR-050-319-165-9	8.73975
CBR-050-318-030-1	2.49299
CBR-001-184-750-0	13.2299
CBR-050-317-602-1	-4.97703
CBR-050-319-235-6	5.83961
CBR-050-317-720-6	-2.89094
CBR-001-172-473-5	-8.22751
CBR-050-316-838-5	-10.9966
CBR-050-318-793-7	0.268478
CBR-050-316-759-7	6.80933
CBR-050-317-221-2	1.93441
CBR-001-185-172-2	0.204547
CBR-050-317-646-3	7.97586
CBR-050-318-866-7	1.14064
CBR-050-320-452-2	-0.977667
CBR-001-185-273-6	-7.43849
CBR-001-185-153-9	5.43026
CBR-050-318-560-2	1.79577
CBR-050-317-695-2	4.13173
CBR-001-160-212-3	4.56457
CBR-001-163-897-4	-10.449
CBR-050-318-312-8	3.40672
CBR-050-319-058-7	-2.40272
CBR-001-180-550-8	5.98524
CBR-050-318-434-7	-2.93375
CBR-050-317-946-2	-10.7139
CBR-000-895-701-5	1.70109
CBR-050-318-752-8	2.12395
CBR-050-323-012-4	5.58737
CBR-001-173-045-3	-12.3442
CBR-050-319-307-5		-22.1808
CBR-001-763-923-5	0.998511
CBR-050-317-209-6	3.95218
CBR-050-320-378-9	-1.80899
CBR-050-318-122-4	-1.47869
CBR-001-188-378-6	-7.00676
CBR-001-185-871-2	-3.25145
CBR-050-317-501-7	7.97326
CBR-050-317-189-9	-4.34186
CBR-001-158-348-5	-17.1214
CBR-050-319-614-3	33.5225
CBR-001-185-745-7	-1.05436
CBR-050-318-552-2	5.5844
CBR-050-318-301-5	0.995485
CBR-050-318-974-0	8.95254
CBR-050-318-771-1	19.0625
CBR-001-177-667-3	-0.268718
CBR-001-573-968-1	-1.81661
CBR-001-178-339-4	-3.50983
CBR-001-167-630-5	1.89815
CBR-050-318-456-3	5.2304
CBR-050-317-647-4	0.58048
CBR-050-318-913-7		-36.079
CBR-050-318-583-9	6.59745
CBR-050-318-797-1	0.523305
CBR-050-317-064-7	3.34231
CBR-050-317-746-6	1.68063
CBR-050-316-757-5	0.340076
CBR-050-314-591-3	-3.85999
CBR-001-186-087-0	-8.56989
CBR-050-320-441-9	18.8821
CBR-050-319-098-5	-1.58246
CBR-001-160-404-9	-3.93999
CBR-050-317-172-0	-4.01941
CBR-001-175-710-1	7.47235
CBR-050-318-073-2	-1.57458
CBR-050-318-997-7	-1.94055
CBR-050-317-440-1	1.76031
CBR-050-319-254-9	-1.2402
CBR-050-317-362-4	18.6097
CBR-050-319-076-9	-5.57753
CBR-001-184-751-1	-1.9952
CBR-050-319-234-5	0.508923
CBR-050-319-031-6	-3.04489
CBR-050-316-817-0	-2.94531
CBR-050-318-149-5	3.40829
CBR-050-323-058-8	4.60613
CBR-050-318-354-8	9.31845
CBR-050-317-149-1	-4.03849
CBR-001-159-848-4	3.17041
CBR-050-319-270-9	5.71797
CBR-050-319-084-9	-7.35401
CBR-050-318-774-4	6.0658
CBR-050-318-746-0	0.147153
CBR-001-177-876-0	-5.66765
CBR-050-317-958-6	0.410902
CBR-050-318-742-6	-0.4961
CBR-050-316-754-2	0.95141
CBR-050-318-540-8	-9.08979
CBR-001-185-599-5	0.301693
CBR-050-318-596-4	4.66472
CBR-050-318-577-1	-3.37222
CBR-001-175-822-8	-2.33624
CBR-050-317-553-9	-6.29689
CBR-050-318-192-8	6.4284
CBR-050-319-835-4	6.21166
CBR-050-318-875-8	-14.3113
CBR-050-312-914-4	-15.8928
CBR-001-173-819-5		-20.8093
CBR-050-316-938-8	-12.6519
CBR-050-316-955-9	-3.68799
CBR-050-323-047-5	4.77556
CBR-050-316-784-8	1.55268
CBR-050-317-495-6	9.96577
CBR-050-317-499-0	-15.1678
CBR-050-318-835-0	36.3381
CBR-050-319-536-6	4.94048
CBR-001-571-523-8	-1.64713
CBR-001-176-817-5	0.869308
CBR-050-318-415-4	0.0926707
CBR-050-316-767-7		-24.2432
CBR-001-571-473-5	-0.945541
CBR-050-319-454-5	0.564242
CBR-001-572-926-7	2.57972
CBR-050-317-024-9	9.7766
CBR-050-318-806-5	13.6387
CBR-001-168-661-6	8.29476
CBR-050-316-865-8	2.37567
CBR-001-210-554-3	1.39118
CBR-001-185-125-5	-2.5713
CBR-050-316-901-5	4.41669
CBR-050-319-518-4	-4.63047
CBR-050-319-248-1	-3.59694
CBR-050-320-691-5	-5.47535
CBR-050-319-925-5	4.05833
CBR-001-174-163-2	-11.6528
CBR-050-317-789-7	-2.80817
CBR-050-323-027-1	-3.80963
CBR-050-317-294-9		-23.415
CBR-050-316-777-9	0.183131
CBR-001-184-849-0	0.766175
CBR-050-319-095-2	0.852401
CBR-050-317-890-3	-3.23723
CBR-001-173-296-0	-2.11807
CBR-001-177-955-8	-0.10616
CBR-050-318-182-6	0.262323
CBR-050-317-528-8	2.27552
CBR-050-317-610-1	2.39341
CBR-050-316-788-2	5.75175
CBR-050-318-952-4	-0.960385
CBR-001-188-710-8	0.903259
CBR-050-318-601-4	3.38685
CBR-050-317-232-5	0.385357
CBR-001-170-870-6	-3.70713
CBR-050-318-223-8	11.5396
CBR-001-171-815-3	-2.81504
CBR-001-177-828-2	11.9403
CBR-050-316-842-1	-2.29685
CBR-001-178-019-1	4.02471
CBR-001-039-546-7	13.3519
CBR-050-316-722-4	1.39386
CBR-001-177-651-5	6.80749
CBR-050-317-696-3	-9.89358
CBR-050-318-633-2	0.417913
CBR-050-318-801-0	-12.3575
CBR-050-315-988-4	-2.62895
CBR-050-319-088-3	-13.7093
CBR-001-722-337-9	2.66667
CBR-050-319-011-2	15.4552
CBR-050-317-594-8	-10.7278
CBR-050-319-286-7	-11.1832
CBR-050-317-907-5	-6.73795
CBR-050-323-056-6	-5.03373
CBR-050-313-239-6	2.51221
CBR-001-158-652-0	1.89789
CBR-001-159-312-7	8.9864
CBR-050-316-963-9	0.70734
CBR-050-317-872-1	-11.1567
CBR-050-127-020-8	0.291796
CBR-050-317-982-6	2.82749
CBR-001-587-268-1	0.243054
CBR-050-318-870-3	7.09508
CBR-050-318-148-4	-1.30639
CBR-050-317-171-9	-2.12433
CBR-001-572-940-5	109.085
CBR-050-316-707-5	83.7528
CBR-050-317-575-5	-4.50959
CBR-050-319-210-7	-6.85716
CBR-050-319-687-0	-3.04876
CBR-050-318-290-9	-5.01451
CBR-050-317-436-5		-43.8771
CBR-050-316-766-6		-67.4317
CBR-001-586-837-8	-3.76079
CBR-050-318-027-6	-13.7548
CBR-050-317-751-3	48.8611
CBR-001-584-593-9	-3.20579
CBR-050-319-630-3		-42.1454
CBR-050-323-041-9	-5.06768
CBR-050-349-876-8	3.11115
CBR-050-319-625-6		-38.812
CBR-001-173-552-7		-44.7037
CBR-050-317-839-0	-12.9732
CBR-050-318-065-2		-74.5296
CBR-050-312-892-5	32.4399
CBR-001-172-440-6	-0.368097
CBR-050-316-758-6	10.0157
CBR-001-175-630-2	11.0141
CBR-050-319-066-7	-8.715
CBR-001-170-102-3		-35.7415
CBR-050-318-918-2	-2.3058
CBR-050-318-381-1	17.2367
CBR-001-780-880-9	49.4294
CBR-001-160-225-8	-0.104852
CBR-050-317-800-5	32.0002
CBR-050-318-967-1	11.8923
CBR-050-316-907-1	5.39429
CBR-001-184-745-3	4.42656
CBR-001-573-574-7		-38.0336
CBR-050-316-057-4	31.7737
CBR-050-318-175-7	4.40857
CBR-001-172-910-5	-1.17791
CBR-050-313-791-5	-3.23989
CBR-050-319-357-5	-8.80063
CBR-050-318-124-6	0.96954
CBR-050-318-737-9	2.14478
CBR-001-173-032-8	-1.01134
CBR-050-318-423-4	-15.9556
CBR-050-313-836-1	0.8361
CBR-001-159-307-0	5.47163
CBR-050-318-936-4	3.4813
CBR-050-318-729-9	6.81468
CBR-050-319-327-9	-0.127596
CBR-050-313-254-5	-3.54416
CBR-001-175-967-4	-1.09575
CBR-050-318-440-5	-12.6219
CBR-050-319-114-8	3.72671
CBR-001-173-059-9	-4.48545
CBR-050-318-887-2	-2.55582
CBR-001-572-174-1	-5.18953
CBR-050-316-974-2	-2.73813
CBR-001-185-041-2	-3.78413
CBR-050-319-350-8	2.40963
CBR-050-319-238-9	2.93504
CBR-001-158-795-4	8.90102
CBR-050-314-980-2	-5.984
CBR-050-317-745-5	0.0674501
CBR-050-317-762-6	1.98742
CBR-050-312-161-7	-0.977402
CBR-001-158-671-3	-8.31972
CBR-001-597-271-1	6.43505
CBR-050-317-813-0	0.846794
CBR-050-318-991-1	1.9688
CBR-050-318-134-8	1.64577
CBR-050-318-439-2	-7.7783
CBR-050-318-794-8	-4.40265
CBR-001-172-863-5	-1.61323
CBR-001-160-196-0	2.46996
CBR-001-174-433-5	5.3139
CBR-050-319-944-8	-1.71779
CBR-001-584-606-7	-5.42366
CBR-050-319-362-2	0.593605
CBR-050-316-968-4	-1.33456
CBR-050-318-088-9	0.847602
CBR-050-318-178-0	-0.975697
CBR-050-317-812-9	-6.52135
CBR-001-160-436-7	-2.21977
CBR-050-318-280-7	-2.76571
CBR-001-725-231-2	5.20288
CBR-001-716-380-3	-3.71492
CBR-050-318-325-3	5.17619
CBR-050-319-298-1	0.220495
CBR-001-172-818-0	-5.57898
CBR-050-320-729-2	-8.55892
CBR-050-320-370-1	4.88437
CBR-050-320-276-4	-5.15653
CBR-050-320-200-4	4.1156
CBR-050-320-248-0	-5.18877
CBR-050-319-488-5	7.29917
CBR-050-318-871-4	-2.55598
CBR-050-319-306-4	4.64046
CBR-050-317-353-3	0.410635
CBR-001-174-083-3	-4.19742
CBR-001-670-228-6	-7.19408
CBR-050-318-389-9	7.10345
CBR-001-160-587-1	-6.90455
CBR-001-185-157-3	2.36049
CBR-050-315-879-0	5.43596
CBR-001-174-219-1	-8.9904
CBR-001-728-382-8	-6.64531
CBR-050-317-948-4	1.58421
CBR-001-173-501-6	-9.22725
CBR-001-171-328-3	-10.5938
CBR-001-160-452-7	-1.29501
CBR-050-316-774-6	0.926021
CBR-001-729-053-8	0.0771114
CBR-050-322-822-6	4.66917
CBR-050-318-603-6	0.330642
CBR-050-319-233-4	-1.80849
CBR-050-313-141-7	-1.01452
CBR-001-732-226-8	-10.1294
CBR-050-317-545-9	-4.49896
CBR-050-318-546-4	7.59951
CBR-001-172-636-6	-4.34173
CBR-001-714-139-8	-1.32344
CBR-001-185-626-1	1.89293
CBR-050-318-863-4	0.665821
CBR-050-317-408-1	7.91956
CBR-050-315-349-9	-3.77853
CBR-050-318-295-4	-7.85483
CBR-050-319-139-7	3.7881
CBR-050-319-336-0	-0.692123
CBR-050-319-214-1	-4.52317
CBR-050-317-998-4	-0.776551
CBR-001-171-974-7	7.67483
CBR-050-316-785-9	2.62967
CBR-050-317-873-2	12.9011
CBR-001-184-757-7	-1.23644
CBR-050-319-367-7	1.69791
CBR-001-174-449-3	-3.08282
CBR-050-318-544-2	6.98474
CBR-001-160-214-5	6.36217
CBR-001-175-949-2	1.03933
CBR-001-712-781-0	5.07907
CBR-001-173-322-5	-2.64252
CBR-001-186-113-5		-152.765
CBR-001-170-790-7	-4.65367
CBR-050-317-622-5	6.73881
CBR-050-318-181-5	6.9822
CBR-050-318-046-9	7.69801
CBR-001-185-824-5	-5.7972
CBR-001-174-787-8	4.72571
CBR-001-178-610-0	-6.10231
CBR-001-172-808-8		-29.9566
CBR-001-683-732-4	-6.81201
CBR-001-173-336-1	13.581
CBR-001-160-759-3	16.4464
CBR-050-317-900-8	11.4586
CBR-050-316-715-5	1.95639
CBR-050-319-148-8	2.28339
CBR-001-736-039-3		-29.3545
CBR-050-314-262-9	-12.4034
CBR-050-318-529-3	6.40223
CBR-050-316-837-4		-52.8409
CBR-001-158-717-0	2.82582
CBR-050-317-803-8	-8.49997
CBR-001-172-975-2	83.6241
CBR-050-318-644-5	-2.85739
CBR-001-572-174-1	-12.1127
CBR-001-692-846-4		-82.1279
CBR-050-316-893-2		-67.0316
CBR-001-159-723-2	1.26647
CBR-050-317-013-6	19.7418
CBR-050-317-508-4	-1.06161
CBR-001-159-572-5	9.32052
CBR-001-184-106-8	4.57389
CBR-001-175-455-5	-0.540149
CBR-001-726-435-6	-10.5343
CBR-050-318-503-3	31.214
CBR-001-186-371-1	-4.60316
CBR-001-722-832-9	-0.589199
CBR-050-319-259-4	6.15375
CBR-050-317-042-1	-14.2081
CBR-001-601-443-0	4.88941
CBR-001-173-628-0	0.402415
CBR-050-319-305-3	-3.28298
CBR-001-173-486-4	2.13911
CBR-001-173-892-4	0.531821
CBR-050-317-564-2	4.85235
CBR-001-159-358-1		-18.0791
CBR-050-314-453-4	4.55876
CBR-001-177-169-0	1.80033
CBR-050-319-059-8	8.30961
CBR-001-570-998-5	-8.50568
CBR-050-318-142-8	-2.05863
CBR-050-318-258-9	4.19844
CBR-001-174-769-6	-1.25058
CBR-050-313-237-4	53.1056
CBR-050-319-108-0	-3.67315
CBR-050-318-658-1	-2.14141
CBR-050-318-520-4	11.1014
CBR-001-715-598-5	0.0219934
CBR-001-728-890-3	2.02498
CBR-001-173-015-7	6.7359
CBR-001-187-722-8	7.61656
CBR-001-171-879-9	10.2717
CBR-050-312-778-4	12.2432
CBR-050-317-044-3	2.03366
CBR-001-174-747-0	-12.871
CBR-050-317-981-5	1.07606
CBR-050-318-894-1	0.332524
CBR-050-316-714-4	-2.41921
CBR-001-683-929-5	1.82708
CBR-050-311-585-3	-9.61655
CBR-001-171-384-1	4.09264
CBR-050-318-010-7	1.93457
CBR-001-742-099-4	0.624197
CBR-001-172-678-6	6.95466
CBR-050-317-507-3	4.99551
CBR-050-316-917-3	3.08516
CBR-050-312-777-3	-5.08636
CBR-050-317-621-4	-14.6324
CBR-050-317-965-5	-2.43247
CBR-001-779-829-7	1.75439
CBR-050-318-188-2	-6.81644
CBR-001-175-102-3	0.316922
CBR-050-320-709-8	4.80906
CBR-050-318-252-3	-2.48476
CBR-001-185-647-6	3.21805
CBR-050-318-680-9	0.671541
CBR-050-317-148-0		-42.4754
CBR-050-317-283-6	0.661031
CBR-001-173-953-0	0.209576
CBR-050-314-618-7	257.864
CBR-001-571-377-6	-4.11065
CBR-001-716-910-7	797.118
CBR-001-172-613-9	-6.9084
CBR-001-172-527-2		-78.8612
CBR-001-724-598-6	0.543381
CBR-050-318-530-6	-3.12129
CBR-001-728-283-6	3.80679
CBR-001-734-828-6		-201.979
CBR-050-319-293-6	804.397
CBR-050-318-789-1	15.6241
CBR-050-318-821-4		-22.6809
CBR-050-317-093-2	16.0686
CBR-050-317-220-1	-5.59225
CBR-001-186-378-8	-7.74366
CBR-050-317-586-8	11.2486
CBR-000-895-625-0	4.80445
CBR-050-314-532-2	16.1558
CBR-001-172-456-4	4.85287
CBR-001-173-588-9	-12.1523
CBR-050-318-127-9	5.94364
CBR-001-172-231-9	-5.58999
CBR-050-318-569-1	-3.42437
CBR-001-714-217-5	9.70785
CBR-001-715-334-3	-4.16489
CBR-001-185-573-5	0.907192
CBR-050-315-887-0	1.4569
CBR-050-317-110-6	-0.697389
CBR-050-318-586-2	2.26901
CBR-001-715-078-6	-9.50646
CBR-001-184-442-1	-12.389
CBR-000-895-475-4	-6.2515
CBR-001-186-836-3	6.30959
CBR-001-709-589-5	5.20874
CBR-001-185-465-2	1.80774
CBR-050-317-680-5	23.6244
CBR-001-173-298-2	1.72962
CBR-050-316-687-8	12.4591
CBR-001-172-954-7	12.2703
CBR-050-314-313-3	-5.07608
CBR-050-314-653-0	11.9471
CBR-050-317-158-2	12.5808
CBR-001-732-163-0	11.4373
CBR-050-320-681-3	6.49405
CBR-001-174-068-4	-8.1307
CBR-001-725-845-6	2.82945
CBR-050-317-048-7	31.8664
CBR-001-160-580-4	22.3178
CBR-001-722-323-3	0.748143
CBR-050-317-824-3	-1.2428
CBR-050-317-614-5	-10.2885
CBR-001-716-829-5	1.1666
CBR-001-738-906-9	-2.97202
CBR-001-712-779-6	-11.7672
CBR-050-320-394-9	-8.56477
CBR-050-315-713-9	-5.22776
CBR-001-709-546-4	6.84919
CBR-001-732-942-9	10.9374
CBR-050-319-244-7	14.3165
CBR-001-173-317-8	37.2192
CBR-001-160-603-4	-2.19443
CBR-001-715-469-7	0.847564
CBR-001-173-715-8	-15.7059
CBR-001-742-138-4	-11.5509
CBR-050-318-661-6	-15.4254
CBR-050-319-218-5	-4.11706
CBR-001-173-084-0	-0.489743
CBR-001-160-775-3	-3.15224
CBR-001-715-531-6	-3.3429
CBR-001-158-716-9	-5.29166
CBR-050-317-557-3		-18.5127
CBR-001-185-430-1	2.23301
CBR-050-321-589-2	3.90689
CBR-050-318-332-2	3.79637
CBR-001-711-256-0	-1.76476
CBR-050-312-352-2	11.567
CBR-050-317-127-5	1.50883
CBR-001-176-417-3	3.15002
CBR-050-317-775-1	-1.84806
CBR-001-172-663-9	7.10188
CBR-001-185-855-2	3.82091
CBR-050-319-223-2	-4.03793
CBR-001-709-904-6	-9.01925
CBR-001-185-810-9	4.11168
CBR-050-317-909-7	2.27567
CBR-050-318-338-8	1.07652
CBR-001-722-767-7	-4.88047
CBR-001-186-516-0	-10.2467
CBR-001-173-405-7	-2.78165
CBR-050-317-807-2	-14.8696
CBR-050-317-118-4		-18.7278
CBR-001-719-801-5	-6.50637
CBR-001-173-620-2	-6.86367
CBR-050-317-493-4	-7.34829
CBR-050-317-041-0	-8.83427
CBR-001-173-556-1		-21.8666
CBR-050-318-107-5	-3.09579
CBR-050-317-341-9	15.9788
CBR-001-723-139-9	-7.51276
CBR-050-318-620-7	2.67048
CBR-001-173-274-4	-5.75974
CBR-001-726-169-7	-1.34286
CBR-050-318-565-7	5.5605
CBR-050-319-296-9	-2.11766
CBR-001-716-815-9	-4.82432
CBR-001-175-709-8	-0.741301
CBR-050-317-278-9	3.76726
CBR-050-318-773-3	-9.91547
CBR-001-160-727-5	-6.35181
CBR-050-313-414-3	0.853063
CBR-001-634-778-7	-4.07744
CBR-050-316-133-9	-6.56871
CBR-001-185-868-7	-0.973005
CBR-050-319-602-9	11.7271
CBR-001-712-080-8	-0.961986
CBR-050-319-338-2	-10.6034
CBR-001-173-136-5	-15.5102
CBR-050-319-183-1	2.18759
CBR-001-173-126-3	-1.5981
CBR-001-174-435-7	-3.51851
CBR-001-673-877-5	-0.487195
CBR-001-160-150-6	-6.0771
CBR-050-316-764-4		-27.417
CBR-050-320-129-4	11.4641
CBR-050-317-537-9	-2.56327
CBR-050-321-238-2	9.33333
CBR-001-824-951-9	-2.83961
CBR-001-165-153-9		-25.7143
CBR-050-319-251-6	-9.48463
CBR-050-319-186-4	-9.59686
CBR-001-173-416-0	-11.741
CBR-050-318-393-5	-5.63165
CBR-050-318-506-6	-9.092
CBR-001-173-200-6	-16.6445
CBR-050-318-610-5	-15.5621
CBR-001-186-064-3	8.07283
CBR-001-175-071-3	3.60182
CBR-001-715-952-3	1.15118
CBR-050-318-652-5	4.00362
CBR-001-174-691-1		-26.5816
CBR-001-169-013-4	-11.1839
CBR-050-317-855-0	-3.72137
CBR-050-316-900-4	-13.3558
CBR-001-159-099-1		-18.1454
CBR-001-747-595-5	6.09821
CBR-001-160-055-8	-2.49142
CBR-050-318-283-0	12.9366
CBR-001-742-409-8	-0.746034
CBR-001-737-573-4	-8.57367
CBR-001-158-350-9	-10.3879
CBR-001-187-820-9	2.70001
CBR-001-727-590-0	-11.9345
CBR-050-316-870-5	-0.396708
CBR-050-315-729-7	0.686581
CBR-001-694-554-3	1.9797
CBR-001-172-496-2	1.6825
CBR-050-317-396-4	6.09854
CBR-050-317-101-5	0.96481
CBR-001-172-777-8	-2.84158
CBR-050-319-294-7	-4.94761
CBR-001-142-105-9	-6.93312
CBR-001-158-858-2	-4.7947
CBR-050-319-458-9	6.88435
CBR-001-166-450-9	-1.03861
CBR-050-070-012-9	0.946524
CBR-050-317-324-8	-10.7937
CBR-050-317-313-5	-4.03839
CBR-001-173-859-3	-6.75545
CBR-001-160-084-3	0.312349
CBR-050-317-596-0	16.785
CBR-050-317-717-1	-1.04816
CBR-001-158-494-4	-11.3558
CBR-001-174-988-5	1.02477
CBR-001-175-968-5	-13.381
CBR-050-317-793-3	-4.2732
CBR-001-184-470-5	7.88216
CBR-050-319-333-7	3.23355
CBR-050-318-676-3	1.91467
CBR-001-733-149-6	7.61138
CBR-050-317-986-0	-4.812
CBR-050-343-960-9	-5.72175
CBR-001-573-953-4	1.70781
CBR-001-172-892-0	19.9023
CBR-001-735-093-5	-2.67705
CBR-050-316-704-2	3.3165
CBR-001-735-445-9	2.06886
CBR-050-314-946-0	-2.07101
CBR-001-173-619-9	1.32743
CBR-001-737-937-2	-1.91173
CBR-001-693-355-4	-6.91702
CBR-001-172-308-3	-15.1095
CBR-050-316-903-7	-2.72637
CBR-001-173-608-6	-4.49977
CBR-050-316-871-6	4.21123
CBR-001-185-467-4	-1.61736
CBR-001-171-831-3	-8.57457
CBR-001-724-738-0	-14.1182
CBR-050-318-105-3	-2.04128
CBR-050-318-176-8	3.50629
CBR-001-673-155-8	16.3235
CBR-050-315-602-3	26.3477
CBR-050-318-925-1	-6.82313
CBR-001-175-613-1	5.07156
CBR-001-593-055-9	-1.34965
CBR-050-317-842-5	-9.02472
CBR-050-319-123-9	-3.01776
CBR-050-315-815-4	-1.47556
CBR-001-159-533-8	-14.555
CBR-001-181-992-4	-2.69573
CBR-001-722-105-5	28.6018
CBR-001-173-717-0	10.807
CBR-001-173-263-1	6.78803
CBR-050-316-991-3	8.45898
CBR-050-317-119-5	-3.51353
CBR-050-323-016-8		-28.5994
CBR-050-317-153-7	18.4488
CBR-001-172-422-4	-1.91349
CBR-001-172-311-8	11.7639
CBR-001-184-481-8	8.85909
CBR-001-173-219-7	-3.47977
CBR-001-173-496-6	2.54298
CBR-001-729-487-0	4.84734
CBR-001-684-143-3		-26.7717
CBR-001-690-872-8	5.77869
CBR-001-170-886-4	6.92805
CBR-050-318-795-9	-7.51564
CBR-001-174-129-0	-10.8014
CBR-050-318-100-8	10.5954
CBR-001-174-003-7	0.106335
CBR-001-173-811-7	9.1657
CBR-001-739-600-8	-9.22399
CBR-001-185-563-3	-2.16369
CBR-001-159-291-9	-12.1267
CBR-050-317-523-3	14.5938
CBR-050-312-809-4	-9.5188
CBR-001-164-032-7	-2.78153
CBR-050-317-504-0	0.660989
CBR-050-318-642-3	-2.47538
CBR-050-318-468-7	6.73968
CBR-050-319-138-6	-0.720065
CBR-050-313-941-1	3.92256
CBR-050-316-727-9	2.21233
CBR-001-174-835-9	3.43543
CBR-001-160-168-6		-29.735
CBR-050-315-563-3	-0.647842
CBR-050-318-365-1	0.0995289
CBR-001-159-050-4	4.0314
CBR-050-313-457-4	-0.259655
CBR-050-317-569-7	-0.240643
CBR-050-320-843-3		-21.6992
CBR-001-159-211-3	6.6468
CBR-001-672-536-3	9.3022
CBR-001-733-032-4	5.55815
CBR-050-318-892-9	-11.2241
CBR-001-729-830-5	1.14785
CBR-001-173-308-7	-0.535797
CBR-050-317-833-4	-1.36356
CBR-001-170-893-3	-0.758421
CBR-001-172-605-9	-11.7938
CBR-050-317-777-3	4.62316
CBR-001-173-599-2	-17.541
CBR-050-317-615-6	-7.00535
CBR-001-170-141-0	-2.51103
CBR-001-178-546-9	0.474838
CBR-001-173-048-6	-1.31397
CBR-001-163-890-7	-3.61468
CBR-001-767-107-7	-3.05997
CBR-001-160-337-5	-5.33263
CBR-050-317-627-0	3.13728
CBR-001-723-583-5	-10.2219
CBR-050-313-532-8	13.3859
CBR-050-317-305-5	35.6492
CBR-050-317-694-1		-18.6105
CBR-050-322-895-3	6.6851
CBR-001-185-899-4	-1.27178
CBR-050-317-028-3	-2.97877
CBR-050-316-703-1	-4.55031
CBR-001-160-616-9	1.17776
CBR-001-734-080-6	10.1103
CBR-001-693-631-5	-3.8064
CBR-001-735-443-7	7.28504
CBR-050-323-022-6	6.22185
CBR-001-160-299-6	3.42122
CBR-050-310-280-5	-4.70813
CBR-050-318-919-3	2.67441
CBR-001-172-229-5	-2.21872
CBR-001-172-921-8	3.89265
CBR-050-313-225-0	0.128991
CBR-050-319-502-6	-3.27302
CBR-001-159-503-2	4.70143
CBR-050-320-075-7	1.33526
CBR-050-342-927-4	-3.92303
CBR-050-323-010-2	-2.02322
CBR-001-172-319-6	-1.54527
CBR-001-174-036-6	-0.0872568
CBR-001-726-419-6	1.82828
CBR-050-318-987-5	4.30433
CBR-001-176-785-4	3.58832
CBR-001-159-261-3	3.48738
CBR-001-692-852-2	-5.79479
CBR-050-323-008-8	-6.95968
CBR-001-172-493-9	-4.36107
CBR-050-317-754-6	-0.136128
CBR-001-689-410-3	-7.88161
CBR-001-733-836-2	7.58724
CBR-001-171-898-2	0.252871
CBR-001-741-818-7	-6.86352
CBR-000-895-684-1	1.97616
CBR-001-741-071-8		-31.3731
CBR-050-317-192-4		-28.1671
CBR-001-160-278-1	0.87368
CBR-050-319-001-0	-6.78723
CBR-050-319-441-0	-8.66667
CBR-050-317-866-3	-5.69525
CBR-050-316-635-6	2.45455
CBR-050-317-574-4	-6.4683
CBR-000-895-854-1	1.4762
CBR-050-318-900-2	-5.1265
CBR-000-805-814-8	9.14338
CBR-001-175-520-7	14.6481
CBR-050-317-218-7	-5.62815
CBR-050-318-862-3	4.77028
CBR-050-319-128-4	11.2644
CBR-001-176-185-6	4.2073
CBR-001-158-909-6	-12.8475
CBR-050-318-377-5	3.18316
CBR-001-173-398-5	8.48986
CBR-050-313-422-3	19.4233
CBR-001-175-568-3	6.16805
CBR-001-720-576-4		-25.7616
CBR-000-918-072-7	2.05993
CBR-001-174-372-9	-0.628152
CBR-050-314-296-9	5.38613
CBR-001-158-911-0	22.5413
CBR-001-173-018-0	24.2235
CBR-001-173-175-2		-57.6838
CBR-050-318-709-5	13.5267
CBR-050-318-958-0		-27.9788
CBR-050-317-468-3	5.82271
CBR-001-742-263-8	21.6972
CBR-050-317-100-4	-7.53562
CBR-001-161-505-7	1.45044
CBR-001-743-371-5	-4.74826
CBR-001-173-083-9	-4.68715
CBR-001-715-097-9	-3.36438
CBR-001-159-290-8	-7.36153
CBR-050-319-048-5	-0.279226
CBR-001-186-148-6	1.81543
CBR-050-317-787-5	1.12697
CBR-001-167-891-4	-3.76256
CBR-001-173-134-3	0.136819
CBR-050-318-885-0	6.18605
CBR-050-314-015-6	-2.38505
CBR-050-319-566-2	5.44103
CBR-050-319-591-3	-8.2964
CBR-050-317-125-3	-6.32751
CBR-050-319-371-3	3.54128
CBR-050-319-069-0	-9.54203
CBR-001-571-645-7	-6.02418
CBR-050-317-916-6	9.28227
CBR-001-159-228-2	-4.35688
CBR-050-317-102-6	-4.27896
CBR-050-317-186-6	9.71005
CBR-001-184-448-7	-7.9736
CBR-001-171-112-9	1.11803
CBR-001-159-633-1	-12.3983
CBR-050-317-427-4	-0.0293107
CBR-000-895-089-8	0.405109
CBR-001-168-339-9	8.37529
CBR-050-317-929-1	-3.90921
CBR-000-917-725-7	-2.47328
CBR-001-180-585-9	6.60529
CBR-050-319-105-7	2.11663
CBR-001-169-700-0	-6.946
CBR-050-318-784-6	8.34943
CBR-001-158-623-5	6.63696
CBR-001-188-392-4	-0.620138
CBR-001-702-417-8	-1.24897
CBR-001-733-358-3	-10.7435
CBR-001-734-800-4	4.01064
CBR-001-174-213-5	16.5523
CBR-001-186-718-8	-16.4504
CBR-050-312-931-5	12.3982
CBR-001-186-102-2	4.3513
CBR-001-166-316-4	5.1637
CBR-001-163-929-5	-10.3871
CBR-001-158-895-7	-1.27657
CBR-001-186-204-7	2.44197
CBR-001-172-680-0	-0.65633
CBR-001-168-645-6	-7.16105
CBR-001-164-586-6	4.92002
CBR-050-314-270-9	8.63476
CBR-050-316-866-9	2.66613
CBR-050-317-476-3	-5.46046
CBR-050-317-765-9	-8.4536
CBR-050-317-477-4		-61.9315
CBR-001-726-153-9		-18.1598
CBR-001-172-654-8	-2.00544
CBR-001-712-939-4	12.617
CBR-001-188-711-9	3.74088
CBR-001-185-831-4	-2.37658
CBR-000-899-431-8	-2.75379
CBR-050-317-083-0	-1.05385
CBR-001-170-143-2	-3.23103
CBR-000-895-253-2	90.877
CBR-001-159-667-1	42.5931
CBR-050-313-674-1	-10.4308
CBR-050-315-869-8	-4.41661
CBR-001-742-874-9	31.6678
CBR-001-178-212-0	-11.7692
CBR-050-322-897-5	10.2721
CBR-050-317-087-4	16.4829
CBR-050-318-945-5	-1.29179
CBR-050-318-138-2	10.3068
CBR-050-317-108-2	-1.45395
CBR-050-318-978-4	3.49686
CBR-001-835-649-5	-3.62152
CBR-001-174-249-7	-2.73163
CBR-050-314-497-6	4.41244
CBR-050-317-280-3	26.806
CBR-001-719-784-1	8.98646
CBR-001-709-313-9	8.68022
CBR-050-317-988-2	13.8634
CBR-001-178-674-6	-4.49151
CBR-050-320-674-4	8.11697
CBR-050-318-286-3	-11.9325
CBR-050-320-036-0	0.754349
CBR-000-894-739-5	2.67105
CBR-050-318-911-5	-6.64539
CBR-001-170-086-0		-22.4295
CBR-050-316-846-5	-17.5088
CBR-001-173-519-6		-19.3231
CBR-001-173-380-5	27.519
CBR-001-185-267-8	-2.03112
CBR-001-174-084-4	-5.6167
CBR-001-187-428-5	19.7592
CBR-050-317-375-9	-4.24426
CBR-001-722-492-9	3.22417
CBR-001-187-140-2	9.56134
CBR-001-185-044-5	-7.20329
CBR-050-318-184-8		-22.732
CBR-050-318-208-9	24.7075
CBR-050-318-103-1	12.1598
CBR-050-318-041-4	15.5956
CBR-001-162-304-4	-0.888524
CBR-050-316-748-4	9.55619
CBR-050-320-055-3	-3.16733
CBR-001-748-571-1	11.477
CBR-001-174-261-3	7.90372
CBR-050-318-613-8	27.4186
CBR-001-173-370-3	-16.9573
CBR-050-317-295-0	28.3294
CBR-001-173-290-4	-5.65641
CBR-001-185-767-3	0.974828
CBR-000-900-407-3	-6.0241
CBR-001-174-698-8	1.95904
CBR-001-173-110-5	5.26975
CBR-001-160-167-5	-11.6686
CBR-050-318-232-9	11.3559
CBR-001-165-027-4	9.61311
CBR-050-320-859-1	-7.68336
CBR-001-160-283-8	1.28883
CBR-001-694-956-7	-0.967555
CBR-001-160-331-9	20.6801
CBR-050-313-019-6	-9.44568
CBR-050-317-360-2	5.2889
CBR-050-317-202-9	-3.86383
CBR-050-319-284-5	-10.624
CBR-050-316-489-4	-5.03093
CBR-050-315-213-4	-5.5081
CBR-050-316-545-5	-2.00158
CBR-050-311-314-2	-3.03294
CBR-001-173-170-7	3.67478
CBR-001-172-470-2	4.53921
CBR-001-160-484-5	-10.0097
CBR-050-315-046-7	-5.7953
CBR-001-821-505-9	3.71266
CBR-001-185-826-7	3.82627
CBR-001-718-680-0	11.1944
CBR-001-184-816-1	7.65199
CBR-001-163-953-5	1.45551
CBR-001-800-854-3	1.40523
CBR-001-172-968-3	4.78631
CBR-001-160-528-0	-15.7325
CBR-050-314-995-9		-35.8504
CBR-050-319-345-1	7.1356
CBR-001-175-467-9	-15.6237
CBR-001-166-962-8	4.0095
CBR-050-318-845-2	-2.55407
CBR-050-314-828-5		-20.612
CBR-050-311-379-9	-0.51159
CBR-000-923-826-0	-13.8203
CBR-001-172-743-8	0.830851
CBR-000-916-890-5	-11.5943
CBR-050-317-181-1	-7.2221
CBR-050-317-023-8	0.325085
CBR-001-171-394-3	6.64356
CBR-001-739-734-1	0.593235
CBR-050-317-978-0	-0.374139
[truncated: 305,063+ more rows]
