# Supplementary material for: Targeted protein degradation by KLHDC2 ligands identified by high-throughput screening
Source: eLife. 2025 Jun 16;14:RP106844. doi: 10.7554/eLife.106844 (PMC12169847; doi:10.7554/eLife.106844)
Supplement: Figure 2—source data 1. [file elife-106844-fig2-data1.xlsx]

## Sheet: Figure 2C
nM	KLHDC2			KEAP1
10000	-16.9042	-31.6734	-31.9543	14.9	22.1	19.3
3333.33	-18.1042	-20.4734	-17.5543	8.697	21.8	19.7
1111.11	-13.7042	-3.37342	-3.85425	21.2	15.6	17.3
370.37	-4.60421	3.82658	-2.85425	24.1	16.2	17.6
123.457	-3.50421	-5.78237	-9.45425	21.2	18.9	16.3
41.1523	2.69579	0.382765	-2.85425	12.2	19.5	19.8
13.7174	2.39579	3.52658	-0.65425	24.4	19.1	17
4.57247	1.99579	-1.27342	-4.95425	27.1	18.2	28.2
1.52416	-13.1042	-0.47342	-3.75425	20.7	19.8	19.8
0.508053	0.195792	5.92658	-4.85425	11.1	15.1	18.7
0.169351	0.695792	5.52658	-6.15425	15.2	20.2	9.533

## Sheet: Figure 2D
nM	KLHDC2			KEAP1
10000	-26.0042	-23.7734	-24.4543	17.3	22.1	15.2
3333.33	-28.2042	-24.2734	-28.2543	14.8	21.8	27
1111.11	-10.1042	-12.1734	-2.85425	20.2	15.6	21
370.37	-2.80421	-8.67342	-1.25425	22.6	16.2	24.9
123.457	-3.30421	-7.67342	-6.55425	24.5	18.9	12.1
41.1523	1.99579	10.1266	8.19175	21.6	19.5	32
13.7174	2.49579	7.92658	-2.55425	18.8	19.1	18
4.57247	3.89579	7.12358	-7.35425	20.3	18.2	19.6
1.52416	-0.30421	-6.17342	-5.55425	17	19.8	20.3
0.508053	-10.2042	5.92658	-5.85425	10.4	15.1	11.1
0.169351	-6.70421	3.42658	-1.25425	14.7	20.2	14.4

## Sheet: Figure 2E
Time s	10 nM	20 nM	40 nM	625 nM	1250 nM	2500 nM	5000 nM	10000 nM
-60.06	-0.162598	-0.238766	-0.247559	-0.302979	-0.390133	-0.261475	-0.28735	-0.538574
-59.96	-0.0947266	-0.183343	-0.21875	-0.347656	-0.369866	-0.294434	-0.285149	-0.520752
-59.86	-0.0134277	-0.129387	-0.176514	-0.373291	-0.363518	-0.34668	-0.315422	-0.499512
-59.76	0.0786133	-0.0458947	-0.125	-0.438232	-0.326168	-0.428955	-0.336666	-0.450439
-59.66	0.158447	0.0510328	-0.0625	-0.503906	-0.265129	-0.517822	-0.402336	-0.384766
-59.56	0.248291	0.143311	-0.00464	-0.47876	-0.210449	-0.50293	-0.486572	-0.339355
-59.46	0.256836	0.144774	-0.0358887	-0.471924	-0.254152	-0.513184	-0.556886	-0.374512
-59.36	0.231934	0.108151	-0.0600586	-0.386719	-0.312015	-0.442139	-0.598392	-0.392578
-59.26	0.170166	0.0385714	-0.0788574	-0.320313	-0.363528	-0.376465	-0.546878	-0.412109
-59.16	0.0913086	-0.0551815	-0.0859375	-0.313232	-0.417486	-0.382568	-0.509283	-0.433105
-59.06	0.0209961	-0.115237	-0.0913086	-0.324951	-0.417483	-0.389648	-0.506106	-0.433105
-58.96	-0.0244141	-0.140382	-0.10083	-0.320313	-0.405031	-0.398438	-0.481202	-0.438721
-58.86	-0.017334	-0.117678	-0.0842285	-0.306152	-0.37134	-0.381836	-0.434329	-0.429199
-58.76	-0.0266113	-0.122315	-0.114746	-0.330322	-0.371339	-0.393555	-0.439698	-0.440918
-58.66	-0.0361328	-0.120118	-0.120361	-0.343018	-0.376954	-0.395996	-0.442139	-0.443359
-58.56	-0.0290527	-0.107422	-0.119385	-0.337402	-0.371338	-0.393555	-0.439698	-0.436279
-58.46	-0.0290527	-0.108399	-0.120361	-0.328125	-0.365234	-0.39917	-0.446777	-0.447998
-58.36	-0.0212402	-0.0949713	-0.119385	-0.317871	-0.356446	-0.4021	-0.438965	-0.440186
-58.26	-0.0290527	-0.102051	-0.117188	-0.320313	-0.362061	-0.399902	-0.446045	-0.437012
-58.16	-0.0290527	-0.103516	-0.114746	-0.314697	-0.356446	-0.394287	-0.440431	-0.437012
-58.06	-0.0322266	-0.104492	-0.125	-0.320313	-0.36206	-0.399902	-0.446045	-0.439453
-57.96	-0.0251465	-0.090332	-0.11792	-0.313232	-0.350342	-0.38501	-0.434326	-0.411377
-57.86	-0.0219727	-0.090332	-0.113281	-0.320313	-0.343262	-0.373291	-0.419434	-0.394043
-57.76	-0.0290527	-0.0903316	-0.106201	-0.310059	-0.340087	-0.352295	-0.404541	-0.384766
-57.66	-0.017334	-0.0786133	-0.106201	-0.289063	-0.326172	-0.323242	-0.383545	-0.373779
-57.56	-0.0126953	-0.090332	-0.106201	-0.277344	-0.308838	-0.313965	-0.371826	-0.373779
-57.46	-0.00562	-0.0903318	-0.106201	-0.262451	-0.29956	-0.303711	-0.368652	-0.373779
-57.36	-0.00244	-0.0871588	-0.0998535	-0.239746	-0.281495	-0.288086	-0.345948	-0.367432
-57.26	-0.00952	-0.102051	-0.0976563	-0.235107	-0.273682	-0.275635	-0.333496	-0.365234
-57.16	-0.00952	-0.105225	-0.0905762	-0.21875	-0.26294	-0.27417	-0.321778	-0.365234
-57.06	-0.00952	-0.102051	-0.0905762	-0.207031	-0.250244	-0.26709	-0.3125	-0.350342
-56.96	-0.00952	-0.0786139	-0.0913086	-0.19751	-0.2417	-0.25293	-0.288087	-0.326904
-56.86	-0.00635	-0.0708014	-0.0983887	-0.214844	-0.238526	-0.264648	-0.290528	-0.326904
-56.76	-0.00952	-0.0708015	-0.106201	-0.243652	-0.244874	-0.279541	-0.301514	-0.334717
-56.66	-0.0244141	-0.0754403	-0.125732	-0.262451	-0.273682	-0.303711	-0.325684	-0.354248
-56.56	-0.0290527	-0.0778813	-0.132813	-0.265625	-0.292481	-0.32251	-0.342041	-0.362793
-56.46	-0.0532227	-0.090332	-0.145996	-0.281982	-0.304199	-0.32959	-0.356201	-0.373047
-56.36	-0.0603027	-0.090332	-0.136719	-0.286621	-0.315918	-0.334229	-0.35376	-0.365967
-56.26	-0.0603027	-0.0903316	-0.126465	-0.289063	-0.315917	-0.334229	-0.349121	-0.370605
-56.16	-0.048584	-0.0786133	-0.110107	-0.26709	-0.299561	-0.32251	-0.340576	-0.365967
-56.06	-0.048584	-0.0949707	-0.110107	-0.270264	-0.29248	-0.32251	-0.345215	-0.365967
-55.96	-0.0603027	-0.102051	-0.110107	-0.273438	-0.297119	-0.32251	-0.345215	-0.365967
-55.86	-0.0556641	-0.102051	-0.105469	-0.278076	-0.299561	-0.334961	-0.345215	-0.365967
-55.76	-0.0454102	-0.102051	-0.106201	-0.282715	-0.297119	-0.342041	-0.345215	-0.377686
-55.66	-0.0361328	-0.10205	-0.106201	-0.301514	-0.304199	-0.337402	-0.345214	-0.373047
-55.56	-0.0166016	-0.0895997	-0.0983887	-0.293701	-0.296387	-0.32251	-0.334229	-0.358154
-55.46	-0.0219727	-0.0871588	-0.103027	-0.29834	-0.301026	-0.327148	-0.345948	-0.362793
-55.36	-0.0336914	-0.0942383	-0.110107	-0.30542	-0.308105	-0.32959	-0.353027	-0.369873
-55.26	-0.0361328	-0.106689	-0.121826	-0.300781	-0.315185	-0.327148	-0.353027	-0.374512
-55.16	-0.017334	-0.102051	-0.110107	-0.278809	-0.301025	-0.334229	-0.341309	-0.369873
-55.06	-0.017334	-0.102051	-0.110107	-0.277344	-0.308105	-0.334229	-0.341309	-0.369873
-54.96	-0.0219727	-0.11377	-0.105469	-0.281982	-0.308105	-0.334229	-0.344482	-0.381592
-54.86	-0.0244141	-0.11377	-0.0983887	-0.293701	-0.308105	-0.334229	-0.349121	-0.381592
-54.76	-0.017334	-0.109131	-0.0983887	-0.293701	-0.311279	-0.334229	-0.349121	-0.381592
-54.66	-0.0290527	-0.102051	-0.0983887	-0.29834	-0.32373	-0.342041	-0.356934	-0.376953
-54.56	-0.0258789	-0.109863	-0.0983887	-0.30542	-0.32373	-0.342041	-0.356933	-0.369873
-54.46	-0.0134277	-0.102051	-0.102295	-0.297607	-0.315918	-0.334229	-0.345947	-0.362061
-54.36	-0.0134277	-0.102051	-0.102295	-0.297607	-0.315918	-0.334229	-0.341309	-0.369873
-54.26	-0.0166016	-0.102051	-0.102295	-0.30542	-0.312744	-0.334229	-0.341309	-0.374512
-54.16	-0.0212402	-0.113769	-0.106934	-0.30542	-0.311278	-0.334229	-0.341308	-0.381592
-54.06	-0.00952	-0.102051	-0.102295	-0.293701	-0.304199	-0.327148	-0.332764	-0.369873
-53.96	-0.0141602	-0.102051	-0.110107	-0.293701	-0.315918	-0.345947	-0.337402	-0.369873
-53.86	-0.0212402	-0.106689	-0.110107	-0.293701	-0.320557	-0.349121	-0.349121	-0.381592
-53.76	-0.0290527	-0.113769	-0.114746	-0.293701	-0.327637	-0.35376	-0.35376	-0.384766
-53.66	-0.0244141	-0.120848	-0.112549	-0.30542	-0.322997	-0.349121	-0.3562	-0.392578
-53.56	-0.00562	-0.102051	-0.0866699	-0.293701	-0.304199	-0.330322	-0.337402	-0.370605
-53.46	-0.017334	-0.109863	-0.0983887	-0.293701	-0.304199	-0.338135	-0.337402	-0.365967
-53.36	-0.00952	-0.102051	-0.0905762	-0.293701	-0.3042	-0.327148	-0.337403	-0.358154
-53.26	-0.0141602	-0.10669	-0.0998535	-0.29834	-0.308838	-0.327148	-0.342041	-0.362793
-53.16	-0.0212402	-0.11377	-0.114014	-0.30542	-0.315918	-0.345947	-0.356201	-0.369873
-53.06	-0.0212402	-0.11377	-0.121826	-0.300781	-0.315918	-0.341309	-0.349121	-0.381592
-52.96	-0.0212402	-0.125487	-0.121826	-0.293701	-0.322997	-0.334229	-0.34912	-0.381592
-52.86	-0.0141602	-0.113769	-0.110107	-0.281982	-0.304199	-0.32251	-0.337402	-0.365234
-52.76	-0.0244141	-0.116943	-0.105469	-0.277344	-0.29956	-0.317871	-0.332763	-0.353516
-52.66	-0.017334	-0.109863	-0.0983887	-0.270264	-0.29248	-0.310791	-0.322509	-0.346436
-52.56	-0.00952	-0.102051	-0.0905762	-0.27417	-0.284668	-0.310791	-0.310059	-0.338623
-52.46	-0.0141602	-0.10669	-0.0952148	-0.278809	-0.289307	-0.31543	-0.314698	-0.343262
-52.36	-0.0212402	-0.109131	-0.0976563	-0.285889	-0.293213	-0.32251	-0.321777	-0.350342
-52.26	-0.0212402	-0.11377	-0.102295	-0.285889	-0.296387	-0.32251	-0.321777	-0.350342
-52.16	-0.0212402	-0.11377	-0.102295	-0.28125	-0.296387	-0.32959	-0.321777	-0.358154
-52.06	-0.032959	-0.113769	-0.102295	-0.27417	-0.296386	-0.32251	-0.329589	-0.358154
-51.96	-0.0166016	-0.102051	-0.0905762	-0.262451	-0.284668	-0.310791	-0.317871	-0.346436
-51.86	-0.00952	-0.102051	-0.0905762	-0.262451	-0.296387	-0.310791	-0.317871	-0.346436
-51.76	-0.00952	-0.102051	-0.0905762	-0.270264	-0.296387	-0.310791	-0.313232	-0.358154
-51.66	-0.00952	-0.109863	-0.0905762	-0.270264	-0.291748	-0.307617	-0.306152	-0.358154
-51.56	-0.00952	-0.109863	-0.0983887	-0.270264	-0.284668	-0.314697	-0.317871	-0.358154
-51.46	-0.0134277	-0.102051	-0.0905762	-0.262451	-0.276855	-0.306885	-0.310059	-0.347168
-51.36	-0.0134277	-0.11377	-0.0905762	-0.27417	-0.276855	-0.306885	-0.310059	-0.342529
-51.26	-0.0134277	-0.11377	-0.102295	-0.27417	-0.288574	-0.306885	-0.310059	-0.342529
-51.16	-0.0166016	-0.116943	-0.105469	-0.277344	-0.291747	-0.310059	-0.310058	-0.353516
-51.06	-0.017334	-0.109863	-0.0983887	-0.270264	-0.284668	-0.310791	-0.29834	-0.346436
-50.96	-0.017334	-0.109863	-0.0983887	-0.270264	-0.284668	-0.310791	-0.29834	-0.346436
-50.86	-0.017334	-0.105225	-0.0983887	-0.270264	-0.289307	-0.310791	-0.29834	-0.341797
-50.76	-0.017334	-0.105957	-0.0983887	-0.26709	-0.284668	-0.310791	-0.310059	-0.334717
-50.66	-0.017334	-0.105957	-0.106201	-0.262451	-0.284668	-0.310791	-0.310059	-0.334717
-50.56	-0.017334	-0.105957	-0.101563	-0.270264	-0.284668	-0.310791	-0.310058	-0.346436
-50.46	-0.0141602	-0.114503	-0.0913086	-0.26709	-0.281495	-0.319336	-0.306885	-0.3479
-50.36	-0.032959	-0.121582	-0.110107	-0.27417	-0.288574	-0.326416	-0.313965	-0.362061
-50.26	-0.032959	-0.118408	-0.110107	-0.285889	-0.288574	-0.326416	-0.321777	-0.362061
-50.16	-0.0212402	-0.102051	-0.0983887	-0.27417	-0.291748	-0.314697	-0.310059	-0.350342
-50.06	-0.0166016	-0.11377	-0.0983887	-0.27417	-0.296387	-0.314697	-0.310059	-0.350342
-49.96	-0.00952	-0.11377	-0.0983887	-0.27417	-0.296387	-0.314697	-0.310059	-0.362061
-49.86	-0.017334	-0.113769	-0.110107	-0.27417	-0.296386	-0.314697	-0.310058	-0.357422
-49.76	-0.00562	-0.109863	-0.0952148	-0.262451	-0.29248	-0.310791	-0.29834	-0.338623
-49.66	-0.00562	-0.109863	-0.0905762	-0.262451	-0.29248	-0.310791	-0.29834	-0.338623
-49.56	-0.00562	-0.109863	-0.0983887	-0.262451	-0.289307	-0.306152	-0.29834	-0.346436
-49.46	-0.0126953	-0.105225	-0.09375	-0.269531	-0.28003	-0.294434	-0.30542	-0.341797
-49.36	-0.017334	-0.121582	-0.0983887	-0.27417	-0.284668	-0.310791	-0.310059	-0.346436
-49.26	-0.017334	-0.116943	-0.0983887	-0.27417	-0.284668	-0.310791	-0.310059	-0.343262
-49.16	-0.017334	-0.109863	-0.0983887	-0.27417	-0.284668	-0.310791	-0.30542	-0.338623
-49.06	-0.017334	-0.109863	-0.110107	-0.281982	-0.296386	-0.307617	-0.298339	-0.338623
-48.96	-0.00562	-0.0981445	-0.0983887	-0.270264	-0.284668	-0.29126	-0.286621	-0.338623
-48.86	-0.0134277	-0.105957	-0.0983887	-0.265625	-0.28003	-0.299072	-0.286621	-0.333984
-48.76	-0.0180664	-0.110596	-0.103027	-0.263184	-0.277588	-0.299072	-0.299073	-0.331543
-48.66	-0.0251465	-0.117676	-0.11792	-0.270264	-0.284668	-0.299072	-0.306152	-0.338623
-48.56	-0.0251465	-0.117675	-0.11792	-0.26709	-0.29248	-0.299072	-0.306152	-0.346436
-48.46	-0.0336914	-0.121582	-0.110107	-0.266357	-0.284668	-0.29126	-0.29834	-0.338623
-48.36	-0.0407715	-0.121582	-0.110107	-0.266357	-0.284668	-0.302979	-0.295166	-0.338623
-48.26	-0.0407715	-0.121582	-0.110107	-0.266357	-0.281494	-0.302979	-0.302246	-0.338623
-48.16	-0.0290527	-0.109863	-0.0983887	-0.254639	-0.276855	-0.29126	-0.290527	-0.326904
-48.06	-0.0290527	-0.109863	-0.110107	-0.254639	-0.280029	-0.29126	-0.290527	-0.326904
-47.96	-0.0361328	-0.117676	-0.105469	-0.254639	-0.284668	-0.29126	-0.290527	-0.326904
-47.86	-0.0290527	-0.114501	-0.0983887	-0.254639	-0.284667	-0.29126	-0.290527	-0.326904
-47.76	-0.0290527	-0.11377	-0.0905762	-0.254639	-0.276855	-0.283447	-0.282715	-0.330811
-47.66	-0.0290527	-0.11377	-0.0905762	-0.254639	-0.276855	-0.295166	-0.290527	-0.330811
-47.56	-0.0258789	-0.11377	-0.0983887	-0.254639	-0.276855	-0.295166	-0.290527	-0.326172
-47.46	-0.0212402	-0.113769	-0.0983887	-0.254639	-0.276855	-0.291992	-0.290526	-0.319092
-47.36	-0.0212402	-0.102051	-0.0866699	-0.24292	-0.272949	-0.275635	-0.278809	-0.307373
-47.26	-0.0212402	-0.11377	-0.0866699	-0.254639	-0.272949	-0.275635	-0.278809	-0.307373
-47.16	-0.0212402	-0.11377	-0.0952148	-0.254639	-0.272949	-0.283447	-0.290527	-0.315186
-47.06	-0.0290527	-0.10913	-0.0905762	-0.254639	-0.284667	-0.283447	-0.290527	-0.315186
-46.96	-0.017334	-0.0903324	-0.0788574	-0.24292	-0.269776	-0.271729	-0.278809	-0.303467
-46.86	-0.0219727	-0.102784	-0.0866699	-0.24292	-0.269776	-0.276367	-0.283448	-0.304932
-46.76	-0.0290527	-0.109863	-0.0983887	-0.24292	-0.276855	-0.283447	-0.290527	-0.310547
-46.66	-0.032959	-0.102051	-0.0905762	-0.235107	-0.269043	-0.275635	-0.278076	-0.319092
-46.56	-0.032959	-0.102051	-0.0983887	-0.24292	-0.269043	-0.275635	-0.270996	-0.319092
-46.46	-0.032959	-0.102051	-0.0952148	-0.24292	-0.280762	-0.278809	-0.270996	-0.319092
-46.36	-0.032959	-0.11377	-0.0905762	-0.24292	-0.280762	-0.295166	-0.270996	-0.319092
-46.26	-0.0407715	-0.11377	-0.0905762	-0.254639	-0.280762	-0.291992	-0.275635	-0.319092
-46.16	-0.0407715	-0.113769	-0.0905762	-0.254639	-0.280761	-0.287354	-0.282714	-0.319092
-46.06	-0.0322266	-0.105225	-0.09375	-0.246094	-0.272217	-0.278809	-0.27417	-0.310547
-45.96	-0.0454102	-0.114502	-0.0905762	-0.247559	-0.281494	-0.280273	-0.287353	-0.31665
-45.86	-0.0407715	-0.109863	-0.0788574	-0.24292	-0.276855	-0.275635	-0.282715	-0.307373
-45.76	-0.0407715	-0.109863	-0.0788574	-0.24292	-0.276855	-0.275635	-0.282714	-0.307373
-45.66	-0.032959	-0.102051	-0.0710449	-0.239746	-0.269043	-0.263184	-0.274902	-0.299561
-45.56	-0.0283203	-0.102051	-0.0710449	-0.246826	-0.264404	-0.263916	-0.270264	-0.311279
-45.46	-0.0290527	-0.11377	-0.0827637	-0.246826	-0.257324	-0.263916	-0.263184	-0.311279
-45.36	-0.0290527	-0.110595	-0.0827637	-0.258545	-0.257324	-0.263916	-0.263183	-0.311279
-45.26	-0.0205078	-0.0974122	-0.0788574	-0.245361	-0.260498	-0.255371	-0.262451	-0.302734
-45.16	-0.0368652	-0.102051	-0.0905762	-0.24292	-0.265137	-0.26001	-0.26709	-0.302734
-45.06	-0.0368652	-0.102051	-0.0983887	-0.24292	-0.265137	-0.26001	-0.26709	-0.295654
-44.96	-0.0368652	-0.105225	-0.0983887	-0.24292	-0.265137	-0.26001	-0.26709	-0.307373
-44.86	-0.0368652	-0.109863	-0.0983887	-0.24292	-0.272949	-0.26001	-0.267089	-0.312012
-44.76	-0.0407715	-0.102051	-0.0905762	-0.24292	-0.265137	-0.263916	-0.259277	-0.311279
-44.66	-0.0407715	-0.109863	-0.0905762	-0.24292	-0.265137	-0.263916	-0.259277	-0.311279
-44.56	-0.0407715	-0.109863	-0.102295	-0.24292	-0.265136	-0.263916	-0.259277	-0.311279
-44.46	-0.0336914	-0.0981445	-0.0859375	-0.231201	-0.253418	-0.252197	-0.247559	-0.299561
-44.36	-0.0439453	-0.0981445	-0.0788574	-0.231201	-0.265137	-0.247559	-0.252197	-0.307373
-44.26	-0.0368652	-0.109863	-0.0788574	-0.231201	-0.265137	-0.240479	-0.254639	-0.307373
-44.16	-0.0368652	-0.109863	-0.0788574	-0.24292	-0.265137	-0.240479	-0.259277	-0.307373
-44.06	-0.0368652	-0.109863	-0.0788574	-0.24292	-0.265136	-0.240479	-0.259277	-0.302734
-43.96	-0.0290527	-0.102051	-0.0710449	-0.235107	-0.25415	-0.232666	-0.251465	-0.287842
-43.86	-0.0407715	-0.098877	-0.0788574	-0.235107	-0.249512	-0.240479	-0.251465	-0.287842
-43.76	-0.0407715	-0.102051	-0.0788574	-0.235107	-0.249512	-0.240479	-0.251465	-0.304199
-43.66	-0.0375977	-0.10205	-0.0788574	-0.24292	-0.257323	-0.240479	-0.251464	-0.311279
-43.56	-0.0290527	-0.090332	-0.0671387	-0.231201	-0.245605	-0.22876	-0.239746	-0.299561
-43.46	-0.0290527	-0.0856934	-0.0788574	-0.231201	-0.245605	-0.22876	-0.244385	-0.299561
-43.36	-0.0290527	-0.090332	-0.0788574	-0.231201	-0.245605	-0.233398	-0.251465	-0.294922
-43.26	-0.0290527	-0.090332	-0.0788574	-0.231201	-0.245605	-0.252197	-0.259277	-0.287842
-43.16	-0.0290527	-0.0903312	-0.0788574	-0.231201	-0.257323	-0.252197	-0.259277	-0.287842
-43.06	-0.017334	-0.083252	-0.0671387	-0.219482	-0.245605	-0.240479	-0.247559	-0.283936
-42.96	-0.0290527	-0.090332	-0.0671387	-0.219482	-0.245605	-0.240479	-0.247559	-0.283936
-42.86	-0.0290527	-0.0903314	-0.0749512	-0.231201	-0.248779	-0.240479	-0.247558	-0.283936
-42.76	-0.0212402	-0.0825195	-0.0671387	-0.223389	-0.242432	-0.232666	-0.239746	-0.280762
-42.66	-0.0212402	-0.0825195	-0.0671387	-0.223389	-0.237793	-0.232666	-0.239746	-0.287842
-42.56	-0.0212402	-0.0825195	-0.0671387	-0.223389	-0.240967	-0.232666	-0.239746	-0.287842
-42.46	-0.0290527	-0.0895996	-0.0788574	-0.223389	-0.245605	-0.232666	-0.251465	-0.287842
-42.36	-0.0290527	-0.0825187	-0.0788574	-0.223389	-0.245605	-0.232666	-0.251464	-0.287842
-42.26	-0.0290527	-0.0708008	-0.0671387	-0.21167	-0.241699	-0.225586	-0.239746	-0.276123
-42.16	-0.0290527	-0.0708008	-0.0671387	-0.21167	-0.241699	-0.232666	-0.239746	-0.276123
-42.06	-0.0290527	-0.0786129	-0.0671387	-0.21167	-0.241699	-0.232666	-0.24292	-0.276123
-41.96	-0.0212402	-0.0754395	-0.0710449	-0.208496	-0.233887	-0.224854	-0.239746	-0.280029
-41.86	-0.0212402	-0.0825195	-0.0710449	-0.223389	-0.233887	-0.23584	-0.239746	-0.280029
-41.76	-0.0290527	-0.0825195	-0.0710449	-0.223389	-0.233887	-0.240479	-0.239746	-0.280029
-41.66	-0.0290527	-0.0825195	-0.0788574	-0.223389	-0.233887	-0.240479	-0.239746	-0.280029
-41.56	-0.0290527	-0.0942378	-0.0788574	-0.223389	-0.233886	-0.240479	-0.247558	-0.283203
-41.46	-0.0290527	-0.0825195	-0.0671387	-0.21167	-0.222168	-0.22876	-0.23584	-0.276123
-41.36	-0.0290527	-0.0778809	-0.0671387	-0.21167	-0.222168	-0.22876	-0.23584	-0.276123
-41.26	-0.0290527	-0.083252	-0.0671387	-0.226563	-0.222168	-0.22876	-0.23584	-0.276123
-41.16	-0.0290527	-0.090332	-0.0671387	-0.231201	-0.222168	-0.233398	-0.240479	-0.276123
-41.06	-0.0290527	-0.090332	-0.0671387	-0.231201	-0.238525	-0.240479	-0.247559	-0.276123
-40.96	-0.0407715	-0.0903314	-0.0788574	-0.231201	-0.245605	-0.252197	-0.247558	-0.276123
-40.86	-0.032959	-0.0825195	-0.0710449	-0.223389	-0.237793	-0.244385	-0.251465	-0.268311
-40.76	-0.032959	-0.0856934	-0.0710449	-0.228027	-0.237793	-0.244385	-0.251465	-0.272949
-40.66	-0.032959	-0.090332	-0.0710449	-0.235107	-0.237793	-0.244385	-0.251465	-0.275391
-40.56	-0.0407715	-0.090332	-0.0710449	-0.235107	-0.240967	-0.247559	-0.251465	-0.280762
-40.46	-0.0439453	-0.10205	-0.0788574	-0.235107	-0.245605	-0.252197	-0.251464	-0.287842
-40.36	-0.0368652	-0.0903318	-0.0671387	-0.231201	-0.233886	-0.240479	-0.24292	-0.276123
-40.26	-0.0336914	-0.0871581	-0.0639648	-0.228027	-0.230713	-0.237305	-0.244385	-0.272949
-40.16	-0.0407715	-0.0825195	-0.0639648	-0.223389	-0.226074	-0.232666	-0.239746	-0.268311
-40.06	-0.0407715	-0.0825195	-0.0710449	-0.223389	-0.226074	-0.232666	-0.239746	-0.268311
-39.96	-0.0407715	-0.0825195	-0.0710449	-0.235107	-0.230713	-0.232666	-0.239746	-0.268311
-39.86	-0.0407715	-0.0825189	-0.0710449	-0.235107	-0.237792	-0.232666	-0.239745	-0.268311
-39.76	-0.032959	-0.0871582	-0.0749512	-0.227295	-0.22998	-0.229492	-0.244385	-0.260498
-39.66	-0.032959	-0.0942383	-0.0749512	-0.230469	-0.22998	-0.236572	-0.251465	-0.260498
-39.56	-0.0375977	-0.0942383	-0.078125	-0.235107	-0.22998	-0.236572	-0.251465	-0.276855
-39.46	-0.0446777	-0.0942373	-0.0827637	-0.235107	-0.241698	-0.248291	-0.251464	-0.283936
-39.36	-0.0407715	-0.0825192	-0.0710449	-0.223389	-0.22998	-0.236572	-0.239746	-0.272217
-39.26	-0.0361328	-0.0895994	-0.0664063	-0.21875	-0.228515	-0.231934	-0.235107	-0.267578
-39.16	-0.0290527	-0.0825195	-0.0593262	-0.21167	-0.226074	-0.228027	-0.228027	-0.263672
-39.06	-0.0407715	-0.0825195	-0.0671387	-0.228027	-0.226074	-0.232666	-0.231201	-0.268311
-38.96	-0.0407715	-0.0825195	-0.0671387	-0.235107	-0.226074	-0.232666	-0.23584	-0.268311
-38.86	-0.0407715	-0.0856925	-0.0671387	-0.235107	-0.226073	-0.232666	-0.247558	-0.268311
-38.76	-0.0290527	-0.0786133	-0.0554199	-0.223389	-0.214355	-0.225586	-0.23584	-0.256592
-38.66	-0.0290527	-0.0864258	-0.0600586	-0.223389	-0.226807	-0.232666	-0.240479	-0.256592
-38.56	-0.0322266	-0.0864258	-0.0671387	-0.223389	-0.233887	-0.232666	-0.247559	-0.256592
-38.46	-0.0368652	-0.0864258	-0.0788574	-0.223389	-0.233887	-0.232666	-0.247559	-0.256592
-38.36	-0.0446777	-0.0864248	-0.0788574	-0.223389	-0.233886	-0.240479	-0.247558	-0.272949
-38.26	-0.0322266	-0.0739744	-0.0664063	-0.21875	-0.221435	-0.228027	-0.235107	-0.267578
-38.16	-0.0251465	-0.0786133	-0.0593262	-0.216309	-0.214355	-0.225586	-0.228027	-0.260498
-38.06	-0.0251465	-0.083252	-0.0593262	-0.223389	-0.214355	-0.232666	-0.228027	-0.260498
-37.96	-0.0368652	-0.090332	-0.0593262	-0.223389	-0.214355	-0.232666	-0.228027	-0.260498
-37.86	-0.0415039	-0.0903318	-0.0593262	-0.223389	-0.217529	-0.232666	-0.228027	-0.260498
-37.76	-0.0454102	-0.0871581	-0.0593262	-0.223389	-0.218994	-0.232666	-0.229492	-0.260498
-37.66	-0.0407715	-0.0825195	-0.0671387	-0.223389	-0.214355	-0.232666	-0.231934	-0.260498
-37.56	-0.0407715	-0.0825195	-0.0671387	-0.223389	-0.214355	-0.232666	-0.231934	-0.260498
-37.46	-0.0407715	-0.0942373	-0.0671387	-0.223389	-0.214355	-0.232666	-0.231933	-0.260498
-37.36	-0.0407715	-0.0825195	-0.0554199	-0.21167	-0.218994	-0.220947	-0.223389	-0.248779
-37.26	-0.0407715	-0.0825194	-0.0600586	-0.21167	-0.226074	-0.225586	-0.228027	-0.248779
-37.16	-0.0361328	-0.0810541	-0.0742188	-0.21167	-0.221435	-0.228027	-0.223388	-0.248779
-37.06	-0.0368652	-0.0864258	-0.0671387	-0.21167	-0.214355	-0.220947	-0.228027	-0.256592
-36.96	-0.0368652	-0.0864258	-0.0671387	-0.21167	-0.214355	-0.232666	-0.228027	-0.256592
-36.86	-0.0415039	-0.0864258	-0.0671387	-0.214844	-0.214355	-0.23584	-0.232666	-0.256592
-36.76	-0.048584	-0.0864258	-0.0671387	-0.219482	-0.214355	-0.240479	-0.239746	-0.256592
-36.66	-0.048584	-0.0864255	-0.0671387	-0.219482	-0.214355	-0.240479	-0.239746	-0.259766
-36.56	-0.0454102	-0.0878901	-0.0756836	-0.228027	-0.21582	-0.237305	-0.236572	-0.26123
-36.46	-0.0446777	-0.0825195	-0.0632324	-0.215576	-0.210449	-0.232666	-0.227295	-0.248779
-36.36	-0.0446777	-0.0825195	-0.0678711	-0.215576	-0.210449	-0.232666	-0.231934	-0.253418
-36.26	-0.0478516	-0.0825195	-0.0749512	-0.215576	-0.210449	-0.232666	-0.231934	-0.260498
-36.16	-0.0524902	-0.0942383	-0.0749512	-0.215576	-0.210449	-0.232666	-0.239746	-0.260498
-36.06	-0.0603027	-0.0942377	-0.078125	-0.220215	-0.210449	-0.232666	-0.239745	-0.260498
-35.96	-0.0439453	-0.082519	-0.0742188	-0.210938	-0.194091	-0.220947	-0.223388	-0.244141
-35.86	-0.0368652	-0.0825195	-0.0671387	-0.203857	-0.197998	-0.220947	-0.216309	-0.237061
-35.76	-0.0368652	-0.0825195	-0.0671387	-0.21167	-0.202637	-0.220947	-0.220947	-0.237061
-35.66	-0.0368652	-0.0825195	-0.0671387	-0.21167	-0.202637	-0.220947	-0.228027	-0.241699
-35.56	-0.048584	-0.0825195	-0.0671387	-0.21167	-0.202637	-0.232666	-0.228027	-0.248779
-35.46	-0.048584	-0.0825193	-0.0671387	-0.21167	-0.202636	-0.232666	-0.228027	-0.248779
-35.36	-0.0454102	-0.0871572	-0.0639648	-0.21167	-0.199462	-0.229492	-0.224853	-0.257324
-35.26	-0.032959	-0.0778809	-0.0632324	-0.203857	-0.187012	-0.217041	-0.212402	-0.244873
-35.16	-0.0375977	-0.0825195	-0.0678711	-0.203857	-0.187012	-0.220215	-0.212402	-0.248047
-35.06	-0.0446777	-0.0825195	-0.0749512	-0.203857	-0.19873	-0.224854	-0.212402	-0.252686
-34.96	-0.0446777	-0.0825183	-0.0749512	-0.203857	-0.203368	-0.224854	-0.215575	-0.252686
-34.86	-0.0283203	-0.0778803	-0.0664063	-0.1875	-0.194091	-0.208496	-0.203857	-0.236328
-34.76	-0.0290527	-0.0708008	-0.0593262	-0.196777	-0.187012	-0.201416	-0.196777	-0.229248
-34.66	-0.0322266	-0.0708008	-0.0625	-0.203857	-0.187012	-0.201416	-0.208496	-0.229248
-34.56	-0.0368652	-0.0754395	-0.0671387	-0.203857	-0.190186	-0.206055	-0.208496	-0.233887
-34.46	-0.0368652	-0.0825195	-0.0671387	-0.203857	-0.194824	-0.220947	-0.213135	-0.240967
-34.36	-0.048584	-0.0825195	-0.0671387	-0.203857	-0.194824	-0.220947	-0.220215	-0.240967
-34.26	-0.048584	-0.0825191	-0.0671387	-0.203857	-0.194824	-0.220947	-0.220214	-0.240967
-34.16	-0.0368652	-0.078613	-0.0671387	-0.192139	-0.183105	-0.209229	-0.208496	-0.232422
-34.06	-0.0336914	-0.0786131	-0.0639648	-0.188965	-0.179931	-0.217773	-0.205322	-0.233887
-33.96	-0.0290527	-0.0786133	-0.0593262	-0.184326	-0.175293	-0.213135	-0.200684	-0.229248
-33.86	-0.0290527	-0.0786133	-0.0639648	-0.184326	-0.175293	-0.216309	-0.21167	-0.229248
-33.76	-0.0336914	-0.0786128	-0.0710449	-0.184326	-0.183105	-0.220947	-0.216308	-0.229248
-33.66	-0.0361328	-0.0661616	-0.0664063	-0.176514	-0.175292	-0.208496	-0.203857	-0.216797
-33.56	-0.0290527	-0.059082	-0.0593262	-0.176514	-0.175293	-0.201416	-0.196777	-0.209717
-33.46	-0.0290527	-0.0708008	-0.0593262	-0.184326	-0.175293	-0.201416	-0.201416	-0.214355
-33.36	-0.0290527	-0.0708008	-0.0593262	-0.184326	-0.175293	-0.206055	-0.208496	-0.221436
-33.26	-0.0407715	-0.0708008	-0.0593262	-0.1875	-0.175293	-0.213135	-0.208496	-0.229248
-33.16	-0.0407715	-0.0754391	-0.0742188	-0.192139	-0.175293	-0.213135	-0.208496	-0.229248
-33.06	-0.0361328	-0.0778806	-0.0742188	-0.1875	-0.170654	-0.216309	-0.203857	-0.224609
-32.96	-0.0290527	-0.0708008	-0.0671387	-0.18042	-0.163574	-0.209229	-0.208496	-0.217529
-32.86	-0.0322266	-0.0825195	-0.0671387	-0.18042	-0.166748	-0.209229	-0.208496	-0.217529
-32.76	-0.0368652	-0.0825189	-0.0671387	-0.192139	-0.171386	-0.209229	-0.208495	-0.217529
-32.66	-0.0219727	-0.0676266	-0.0568848	-0.177246	-0.156494	-0.194336	-0.193603	-0.205811
-32.56	-0.0290527	-0.0708008	-0.0593262	-0.172607	-0.151855	-0.194336	-0.188965	-0.205811
-32.46	-0.0290527	-0.0708008	-0.0593262	-0.172607	-0.163574	-0.201416	-0.188965	-0.205811
-32.36	-0.0290527	-0.0708002	-0.0671387	-0.172607	-0.168212	-0.201416	-0.193603	-0.205811
-32.26	-0.0258789	-0.0629883	-0.0593262	-0.169434	-0.16748	-0.193604	-0.192871	-0.197998
-32.16	-0.032959	-0.0661621	-0.0593262	-0.176514	-0.16748	-0.193604	-0.192871	-0.197998
-32.06	-0.032959	-0.0708008	-0.0593262	-0.176514	-0.16748	-0.193604	-0.192871	-0.202637
-31.96	-0.0407715	-0.0708008	-0.0593262	-0.176514	-0.16748	-0.196777	-0.192871	-0.209717
-31.86	-0.0407715	-0.0707999	-0.0710449	-0.176514	-0.16748	-0.213135	-0.200683	-0.209717
-31.76	-0.0290527	-0.0637205	-0.0625	-0.172607	-0.155762	-0.201416	-0.192138	-0.197998
-31.66	-0.0244141	-0.0778803	-0.0625	-0.167969	-0.151123	-0.196777	-0.192138	-0.193359
-31.56	-0.017334	-0.0708008	-0.0554199	-0.164063	-0.144043	-0.189697	-0.185059	-0.186279
-31.46	-0.0290527	-0.0708008	-0.0554199	-0.168701	-0.148682	-0.189697	-0.185059	-0.186279
-31.36	-0.0322266	-0.0708002	-0.0554199	-0.168701	-0.155761	-0.189697	-0.196777	-0.186279
-31.26	-0.0290527	-0.0629883	-0.0476074	-0.160889	-0.147949	-0.181885	-0.188965	-0.190186
-31.16	-0.0290527	-0.0708008	-0.0593262	-0.160889	-0.147949	-0.181885	-0.188965	-0.193359
-31.06	-0.0368652	-0.0739745	-0.0593262	-0.160889	-0.159668	-0.186523	-0.188965	-0.197998
-30.96	-0.0336914	-0.0754391	-0.060791	-0.157715	-0.159668	-0.19043	-0.185791	-0.194824
-30.86	-0.0290527	-0.0707999	-0.0632324	-0.153076	-0.159667	-0.185791	-0.181151	-0.190186
-30.76	-0.017334	-0.059082	-0.0515137	-0.153076	-0.147949	-0.174072	-0.174072	-0.178467
-30.66	-0.017334	-0.0708008	-0.0593262	-0.153076	-0.147949	-0.174072	-0.181152	-0.183105
-30.56	-0.0219727	-0.0708008	-0.0593262	-0.153076	-0.147949	-0.185791	-0.181152	-0.190186
-30.46	-0.0290527	-0.0708008	-0.0593262	-0.157715	-0.147949	-0.185791	-0.181152	-0.190186
-30.36	-0.0407715	-0.0754389	-0.0593262	-0.164795	-0.155761	-0.188965	-0.181152	-0.190186
-30.26	-0.032959	-0.074707	-0.0561523	-0.156982	-0.147949	-0.185791	-0.17334	-0.182373
-30.16	-0.032959	-0.0747067	-0.0632324	-0.156982	-0.152588	-0.185791	-0.176513	-0.182373
-30.06	-0.0283203	-0.0778806	-0.0585938	-0.152344	-0.155029	-0.181152	-0.176513	-0.182373
-29.96	-0.0212402	-0.0708002	-0.0632324	-0.145264	-0.147949	-0.174072	-0.169433	-0.182373
-29.86	-0.0141602	-0.0637209	-0.0561523	-0.138184	-0.140869	-0.174805	-0.162354	-0.183105
-29.76	-0.0166016	-0.0661618	-0.0585938	-0.152344	-0.146484	-0.177246	-0.172607	-0.177734
-29.66	-0.017334	-0.059082	-0.0546875	-0.145264	-0.144043	-0.170166	-0.170166	-0.178467
-29.56	-0.017334	-0.0708008	-0.0593262	-0.145264	-0.144043	-0.174805	-0.177246	-0.181641
-29.46	-0.017334	-0.0707999	-0.0593262	-0.145264	-0.144042	-0.181885	-0.177245	-0.186279
-29.36	-0.00562	-0.059082	-0.0476074	-0.133545	-0.132324	-0.170166	-0.165527	-0.174561
-29.26	-0.0219727	-0.059082	-0.0476074	-0.136719	-0.148682	-0.170166	-0.177246	-0.174561
-29.16	-0.0290527	-0.0590814	-0.0476074	-0.141357	-0.155761	-0.170166	-0.177245	-0.174561
-29.06	-0.0212402	-0.0512695	-0.0476074	-0.141357	-0.147949	-0.162354	-0.169434	-0.166748
-28.96	-0.0212402	-0.055908	-0.0476074	-0.141357	-0.147949	-0.162354	-0.172607	-0.171387
-28.86	-0.0180664	-0.0598141	-0.0444336	-0.142822	-0.144775	-0.15918	-0.174072	-0.187012
-28.76	-0.0134277	-0.0629883	-0.0444336	-0.145264	-0.140137	-0.154541	-0.169434	-0.182373
-28.66	-0.0244141	-0.0629883	-0.0515137	-0.145264	-0.143311	-0.157715	-0.169434	-0.182373
-28.56	-0.0290527	-0.0629878	-0.0515137	-0.145264	-0.147949	-0.162354	-0.169433	-0.182373
-28.46	-0.017334	-0.0512695	-0.0546875	-0.133545	-0.144043	-0.150635	-0.162354	-0.173828
-28.36	-0.017334	-0.0544434	-0.0593262	-0.133545	-0.144043	-0.162354	-0.169434	-0.178467
-28.26	-0.017334	-0.0590817	-0.0593262	-0.133545	-0.144043	-0.166992	-0.169433	-0.178467
-28.16	-0.00952	-0.0629879	-0.0515137	-0.125732	-0.13623	-0.16626	-0.173339	-0.170654
-28.06	-0.0166016	-0.0583493	-0.046875	-0.124268	-0.131591	-0.161621	-0.168701	-0.166016
-27.96	-0.00952	-0.0512695	-0.0397949	-0.121826	-0.12915	-0.154541	-0.16626	-0.158936
-27.86	-0.0141602	-0.0512695	-0.0397949	-0.121826	-0.13623	-0.154541	-0.17334	-0.171387
-27.76	-0.0212402	-0.0512695	-0.0397949	-0.121826	-0.13623	-0.154541	-0.17334	-0.178467
-27.66	-0.0212402	-0.0559082	-0.0522461	-0.121826	-0.13623	-0.154541	-0.17334	-0.178467
-27.56	-0.032959	-0.0629878	-0.0593262	-0.138184	-0.13623	-0.154541	-0.184326	-0.178467
-27.46	-0.0244141	-0.0512692	-0.0476074	-0.133545	-0.124511	-0.145996	-0.177246	-0.166748
-27.36	-0.0244141	-0.0583491	-0.0429688	-0.128906	-0.119873	-0.153809	-0.172607	-0.162109
-27.26	-0.017334	-0.0512695	-0.0358887	-0.121826	-0.115967	-0.146729	-0.165527	-0.169922
-27.16	-0.017334	-0.0544428	-0.0358887	-0.121826	-0.132324	-0.146729	-0.165527	-0.162842
-27.06	-0.017334	-0.0512695	-0.0429688	-0.114014	-0.124512	-0.143555	-0.157715	-0.166748
-26.96	-0.017334	-0.0512695	-0.0476074	-0.114014	-0.124512	-0.150635	-0.157715	-0.171387
-26.86	-0.017334	-0.0590818	-0.0476074	-0.118652	-0.124511	-0.150635	-0.162353	-0.178467
-26.76	-0.0141602	-0.0559076	-0.0444336	-0.122559	-0.125976	-0.147461	-0.166259	-0.175293
-26.66	0.0022	-0.0395508	-0.0280762	-0.106201	-0.116699	-0.142822	-0.149902	-0.158936
-26.56	-0.0141602	-0.0395508	-0.0327148	-0.106201	-0.116699	-0.142822	-0.149902	-0.158936
-26.46	-0.0212402	-0.0395508	-0.0397949	-0.109375	-0.116699	-0.142822	-0.164795	-0.158936
-26.36	-0.0212402	-0.0441889	-0.0515137	-0.121826	-0.116699	-0.142822	-0.169433	-0.158936
-26.26	-0.0134277	-0.0551758	-0.0437012	-0.114014	-0.113525	-0.13501	-0.161621	-0.151123
-26.16	-0.0134277	-0.0551758	-0.0437012	-0.114014	-0.120605	-0.13501	-0.161621	-0.151123
-26.06	-0.0134277	-0.0551758	-0.0437012	-0.114014	-0.120605	-0.13501	-0.161621	-0.151123
-25.96	-0.0212402	-0.0551749	-0.0437012	-0.114014	-0.128417	-0.13501	-0.16162	-0.151123
-25.86	-0.00952	-0.043457	-0.0429688	-0.114014	-0.116699	-0.123291	-0.149902	-0.139404
-25.76	-0.0126953	-0.0512694	-0.0476074	-0.114014	-0.116699	-0.123291	-0.149902	-0.139404
-25.66	-0.0126953	-0.0466303	-0.0429688	-0.109375	-0.11206	-0.118652	-0.145263	-0.134766
-25.56	-0.00562	-0.0395508	-0.0358887	-0.102295	-0.10498	-0.119385	-0.138184	-0.127686
-25.46	-0.00562	-0.0395499	-0.0358887	-0.102295	-0.116698	-0.124023	-0.145995	-0.139404
-25.36	-0.00562	-0.0310059	-0.0288086	-0.0905762	-0.10498	-0.119385	-0.134277	-0.127686
-25.26	-0.0102539	-0.0356445	-0.0358887	-0.0983887	-0.10498	-0.119385	-0.134277	-0.127686
-25.16	-0.017334	-0.0356445	-0.0358887	-0.0983887	-0.10498	-0.119385	-0.134277	-0.127686
-25.06	-0.017334	-0.047363	-0.0358887	-0.0983887	-0.10498	-0.119385	-0.134277	-0.130859
-24.96	-0.00952	-0.0395505	-0.0280762	-0.102295	-0.100342	-0.123291	-0.138183	-0.127686
-24.86	-0.0141602	-0.0363766	-0.0366211	-0.0991211	-0.101806	-0.120117	-0.135009	-0.124512
-24.76	-0.00952	-0.0317383	-0.0319824	-0.0944824	-0.097168	-0.118652	-0.130371	-0.127686
-24.66	-0.00952	-0.0317374	-0.0319824	-0.0944824	-0.10498	-0.123291	-0.13037	-0.119873
-24.56	0.0022	-0.0200195	-0.0202637	-0.0827637	-0.0932617	-0.111572	-0.118652	-0.120605
-24.46	-0.00952	-0.0200195	-0.0280762	-0.0827637	-0.0932617	-0.116211	-0.118652	-0.127686
-24.36	-0.00952	-0.027832	-0.0280762	-0.0827637	-0.0932617	-0.123291	-0.118652	-0.127686
-24.26	-0.00952	-0.027832	-0.0280762	-0.0944824	-0.0932617	-0.123291	-0.123291	-0.127686
-24.16	-0.00952	-0.0278314	-0.0280762	-0.0944824	-0.0978998	-0.123291	-0.13037	-0.127686
-24.06	-0.00171	-0.0317383	-0.0319824	-0.0913086	-0.097168	-0.118652	-0.122559	-0.119873
-23.96	-0.00635	-0.0317383	-0.0319824	-0.0983887	-0.112061	-0.123291	-0.122559	-0.124512
-23.86	-0.00879	-0.0317376	-0.0319824	-0.0983887	-0.116699	-0.123291	-0.122558	-0.131592
-23.76	-0.00488	-0.0231934	-0.0234375	-0.0976563	-0.108154	-0.126465	-0.114014	-0.123047
-23.66	-0.0109863	-0.0292965	-0.0249023	-0.102295	-0.109619	-0.116211	-0.126464	-0.124512
-23.56	-0.0134277	-0.0317383	-0.0202637	-0.102295	-0.10498	-0.12793	-0.126465	-0.119873
-23.46	-0.00879	-0.0395502	-0.0202637	-0.102295	-0.10498	-0.123291	-0.126464	-0.123047
-23.36	0.0061	-0.0317383	-0.0202637	-0.0944824	-0.101807	-0.127197	-0.118652	-0.119873
-23.26	-0.00171	-0.0317383	-0.0202637	-0.0944824	-0.108887	-0.127197	-0.123291	-0.119873
-23.16	-0.00171	-0.0317374	-0.0249023	-0.0944824	-0.108886	-0.130371	-0.13037	-0.13623
-23.06	0.0100098	-0.0317383	-0.0202637	-0.0827637	-0.097168	-0.123291	-0.130371	-0.131592
-22.96	0.0100098	-0.0317383	-0.0234375	-0.0827637	-0.097168	-0.12793	-0.130371	-0.134766
-22.86	0.0100098	-0.036377	-0.0397949	-0.0874023	-0.100342	-0.13501	-0.133545	-0.139404
-22.76	0.00537	-0.0434566	-0.0397949	-0.106201	-0.10498	-0.13501	-0.138183	-0.139404
-22.66	-0.00171	-0.0317383	-0.0280762	-0.0944824	-0.10498	-0.135742	-0.131104	-0.127686
-22.56	-0.00171	-0.031738	-0.0280762	-0.0976563	-0.109619	-0.142822	-0.138183	-0.132324
-22.46	0.00293	-0.0356442	-0.0202637	-0.0944824	-0.108886	-0.13501	-0.130371	-0.131592
-22.36	0.00293	-0.0310053	-0.015625	-0.0944824	-0.104248	-0.133545	-0.125732	-0.126953
-22.26	0.0100098	-0.0239258	-0.00854	-0.0944824	-0.097168	-0.131104	-0.123291	-0.130859
-22.16	0.0022	-0.0239249	-0.0209961	-0.0944824	-0.100341	-0.131104	-0.13037	-0.127686
-22.06	0.013916	-0.0231934	-0.0163574	-0.0827637	-0.0932617	-0.124023	-0.121826	-0.128418
-21.96	0.013916	-0.027832	-0.0195313	-0.09375	-0.105713	-0.131104	-0.138184	-0.135498
-21.86	0.013916	-0.0278314	-0.0241699	-0.0983887	-0.112792	-0.134277	-0.138183	-0.135498
-21.76	0.0217285	-0.0200195	-0.0163574	-0.0905762	-0.10498	-0.131104	-0.130371	-0.127686
-21.66	0.0217285	-0.0200195	-0.0280762	-0.0952148	-0.10498	-0.131104	-0.13501	-0.132324
-21.56	0.00537	-0.036377	-0.0280762	-0.102295	-0.109619	-0.135742	-0.14209	-0.139404
-21.46	-0.00171	-0.0434559	-0.0327148	-0.102295	-0.116698	-0.142822	-0.153075	-0.142578
-21.36	0.0131836	-0.0317379	-0.0249023	-0.0874023	-0.101806	-0.12793	-0.142822	-0.132324
-21.26	0.0146484	-0.0317383	-0.0202637	-0.0874023	-0.100342	-0.126465	-0.138184	-0.127686
-21.16	0.0100098	-0.0317383	-0.0202637	-0.0944824	-0.10498	-0.131104	-0.138184	-0.132324
-21.06	0.0100098	-0.0317378	-0.0351563	-0.0976563	-0.10498	-0.135742	-0.142822	-0.151123
-20.96	0.0146484	-0.0239252	-0.0273438	-0.0898438	-0.0971674	-0.130371	-0.137451	-0.141846
-20.86	0.0170898	-0.0317383	-0.0249023	-0.0944824	-0.108887	-0.123291	-0.130371	-0.139404
-20.76	0.0100098	-0.0317378	-0.0319824	-0.0991211	-0.11206	-0.13501	-0.130371	-0.139404
-20.66	0.0100098	-0.0200195	-0.0280762	-0.0944824	-0.10498	-0.126465	-0.121826	-0.132324
-20.56	0.0100098	-0.0200195	-0.0280762	-0.0944824	-0.10498	-0.131104	-0.126465	-0.139404
-20.46	0.00684	-0.0231931	-0.0327148	-0.0976563	-0.10498	-0.135742	-0.126465	-0.139404
-20.36	0.00537	-0.036376	-0.0366211	-0.0991211	-0.106444	-0.139648	-0.139647	-0.13623
-20.26	0.0131836	-0.0239258	-0.0273438	-0.0866699	-0.108887	-0.127197	-0.134277	-0.126953
-20.16	0.0061	-0.0239258	-0.0437012	-0.0866699	-0.108887	-0.139648	-0.134277	-0.131592
-20.06	-0.00171	-0.0285643	-0.0437012	-0.0913086	-0.108887	-0.146729	-0.137451	-0.144043
-19.96	0.00293	-0.0310044	-0.0390625	-0.101563	-0.10742	-0.14209	-0.13745	-0.146484
-19.86	0.0185547	-0.012207	-0.0202637	-0.0827637	-0.0932617	-0.126465	-0.131104	-0.127686
-19.76	0.0022	-0.0200195	-0.0327148	-0.0827637	-0.0979004	-0.131104	-0.138184	-0.127686
-19.66	-0.00244	-0.0200195	-0.0397949	-0.0859375	-0.10498	-0.131104	-0.138184	-0.127686
-19.56	-0.00952	-0.0231932	-0.0397949	-0.0905762	-0.10498	-0.135742	-0.138183	-0.130859
-19.46	-0.00488	-0.0349107	-0.0383301	-0.0905762	-0.112059	-0.138184	-0.138182	-0.130859
-19.36	0.013916	-0.0161133	-0.0241699	-0.0905762	-0.0979004	-0.119385	-0.126465	-0.112061
-19.26	-0.00244	-0.020752	-0.0358887	-0.0905762	-0.10498	-0.122559	-0.126465	-0.116699
-19.16	-0.00952	-0.0278312	-0.0358887	-0.0905762	-0.10498	-0.127197	-0.129638	-0.123779
-19.06	-0.00171	-0.0168455	-0.0249023	-0.0842285	-0.093994	-0.12793	-0.123291	-0.112793
-18.96	-0.00171	-0.0239258	-0.0249023	-0.0866699	-0.0925293	-0.123291	-0.118652	-0.108154
-18.86	-0.00952	-0.0285645	-0.0319824	-0.0866699	-0.097168	-0.123291	-0.118652	-0.119873
-18.76	-0.00952	-0.0356444	-0.0319824	-0.0976563	-0.0971678	-0.123291	-0.118652	-0.119873
-18.66	-0.00488	-0.0310044	-0.0351563	-0.0976563	-0.0925279	-0.123291	-0.118651	-0.119873
-18.56	0.00928	-0.0231934	-0.0163574	-0.0788574	-0.0861816	-0.111572	-0.118652	-0.108154
-18.46	0.0022	-0.027832	-0.0163574	-0.0788574	-0.0932617	-0.111572	-0.118652	-0.108154
-18.36	-0.00952	-0.0278312	-0.0195313	-0.0788574	-0.0932609	-0.111572	-0.118652	-0.108154
-18.26	-0.00171	-0.0168455	-0.0249023	-0.0678711	-0.0822752	-0.100586	-0.11084	-0.100342
-18.16	-0.00171	-0.012207	-0.0202637	-0.0678711	-0.0776367	-0.106934	-0.11084	-0.100342
-18.06	-0.00171	-0.0285645	-0.0249023	-0.0866699	-0.0808105	-0.111572	-0.11084	-0.100342
-17.96	-0.00952	-0.0356445	-0.0319824	-0.0866699	-0.097168	-0.116211	-0.11084	-0.100342
-17.86	-0.00952	-0.0356433	-0.0319824	-0.0866699	-0.0971667	-0.123291	-0.110839	-0.108154
-17.76	0.0022	-0.0270993	-0.015625	-0.0734863	-0.0808103	-0.106934	-0.0991208	-0.0964355
-17.66	0.0022	-0.0200195	-0.00854	-0.0710449	-0.0737305	-0.0998535	-0.0991211	-0.0964355
-17.56	0.0022	-0.0231934	-0.0163574	-0.0710449	-0.0783691	-0.103027	-0.0991211	-0.0964355
-17.46	0.0022	-0.027832	-0.0163574	-0.0710449	-0.0932617	-0.107666	-0.0991211	-0.0996094
-17.36	-0.00952	-0.0278314	-0.0195313	-0.0827637	-0.0932611	-0.119385	-0.102294	-0.104248
-17.26	-0.00488	-0.0317382	-0.0280762	-0.0749512	-0.0886229	-0.111572	-0.099121	-0.0964355
-17.16	-0.00635	-0.0285641	-0.0249023	-0.076416	-0.0900875	-0.113037	-0.0959469	-0.10498
-17.06	-0.00171	-0.0239253	-0.0202637	-0.0788574	-0.0854488	-0.115479	-0.0913081	-0.100342
-16.96	-0.00244	-0.0168457	-0.00854	-0.0749512	-0.0854492	-0.10376	-0.0874023	-0.088623
-16.86	-0.00952	-0.0239254	-0.0131836	-0.0749512	-0.0854489	-0.10376	-0.0920407	-0.0932617
-16.76	-0.00488	-0.0192868	-0.0273438	-0.0703125	-0.085449	-0.0991211	-0.0944822	-0.0957031
-16.66	0.0022	-0.0200189	-0.0202637	-0.0632324	-0.0854486	-0.092041	-0.0874017	-0.088623
-16.56	-0.00171	-0.012207	-0.0124512	-0.0585938	-0.0776367	-0.0888672	-0.0795898	-0.0808105
-16.46	-0.00171	-0.0122061	-0.0202637	-0.0632324	-0.0776358	-0.0959473	-0.0842276	-0.0808105
-16.36	0.00684	-0.012207	-0.00854	-0.0515137	-0.0776367	-0.092041	-0.0795898	-0.0690918
-16.26	0.0022	-0.0153809	-0.00854	-0.0515137	-0.0776367	-0.092041	-0.0795898	-0.0690918
-16.16	-0.00562	-0.0200195	-0.00854	-0.0678711	-0.0776367	-0.092041	-0.0795898	-0.0722656
-16.06	-0.00562	-0.020019	-0.0249023	-0.0749512	-0.08081	-0.092041	-0.0795893	-0.0769043
-15.96	0.00464	-0.00513	-0.0170898	-0.0600586	-0.0783688	-0.0771484	-0.0764157	-0.0783691
-15.86	-0.00952	-0.00513	-0.0124512	-0.0632324	-0.0737305	-0.0874023	-0.0717773	-0.0690918
-15.76	-0.00952	-0.0200195	-0.0124512	-0.0632324	-0.0737305	-0.092041	-0.0749512	-0.0808105
-15.66	-0.00952	-0.0200189	-0.0202637	-0.0632324	-0.0737299	-0.092041	-0.0795892	-0.0839844
-15.56	-0.00171	-0.012207	-0.0124512	-0.0554199	-0.065918	-0.0842285	-0.0717773	-0.0808105
-15.46	-0.00171	-0.0239254	-0.015625	-0.0554199	-0.0659176	-0.0888672	-0.071777	-0.0854492
-15.36	-0.00879	-0.0192866	-0.0273438	-0.0507813	-0.0659174	-0.0913086	-0.0717768	-0.0878906
-15.26	-0.00635	-0.0122066	-0.0202637	-0.046875	-0.0659175	-0.0874023	-0.0717769	-0.0808105
-15.16	-0.00171	-0.00366	-0.00854	-0.0515137	-0.065918	-0.0803223	-0.0632324	-0.0737305
-15.06	-0.00952	-0.0083	-0.00854	-0.0561523	-0.065918	-0.0803223	-0.0678711	-0.0808105
-14.96	-0.00952	-0.0200195	-0.0163574	-0.0632324	-0.065918	-0.092041	-0.0756836	-0.0839844
-14.86	-0.00952	-0.0200189	-0.0209961	-0.0632324	-0.070556	-0.0966797	-0.0803217	-0.088623
-14.76	-0.00171	-0.012207	-0.0202637	-0.0554199	-0.0698242	-0.0959473	-0.0795898	-0.0808105
-14.66	-0.00171	-0.0168448	-0.0319824	-0.0600586	-0.0729972	-0.0959473	-0.0827628	-0.0932617
-14.56	-0.00171	-0.0200195	-0.0202637	-0.0554199	-0.0737305	-0.0874023	-0.0756836	-0.088623
-14.46	-0.00171	-0.0200195	-0.0202637	-0.0664063	-0.0737305	-0.092041	-0.092041	-0.0917969
-14.36	-0.00171	-0.0200192	-0.0202637	-0.0710449	-0.0737301	-0.092041	-0.0991207	-0.0964355
-14.26	0.00293	-0.0153803	-0.015625	-0.0664063	-0.0737299	-0.0874023	-0.0944819	-0.0917969
-14.16	0.00684	-0.000488	-0.015625	-0.0515137	-0.065918	-0.0771484	-0.0827637	-0.0769043
-14.06	0.0022	-0.012207	-0.0202637	-0.0678711	-0.0776367	-0.092041	-0.0874023	-0.0769043
-13.96	0.0022	-0.012207	-0.0202637	-0.0749512	-0.0808105	-0.092041	-0.0874023	-0.0769043
-13.86	0.0022	-0.0168448	-0.0280762	-0.078125	-0.0822745	-0.092041	-0.0874014	-0.0769043
-13.76	0.0022	-0.012207	-0.0209961	-0.0710449	-0.0690918	-0.0803223	-0.0756836	-0.0651855
-13.66	-0.00244	-0.0200195	-0.0280762	-0.0710449	-0.0737305	-0.0803223	-0.0803223	-0.0651855
-13.56	-0.00952	-0.0231928	-0.0280762	-0.0710449	-0.0737299	-0.0803223	-0.0827631	-0.0769043
-13.46	0.00537	-0.0129391	-0.0249023	-0.0561523	-0.0588375	-0.0654297	-0.0725094	-0.0620117
-13.36	-0.000977	-0.0083	-0.0202637	-0.0515137	-0.0541992	-0.060791	-0.0678711	-0.057373
-13.26	-0.00562	-0.0200192	-0.0234375	-0.0515137	-0.0541989	-0.060791	-0.0678708	-0.057373
-13.16	0.0022	-0.0168457	-0.0280762	-0.0515137	-0.0463867	-0.0529785	-0.0600586	-0.0495605
-13.06	-0.0141602	-0.0239256	-0.0280762	-0.0515137	-0.054199	-0.0529785	-0.0600584	-0.0495605
-12.96	-0.0166016	-0.0192866	-0.0234375	-0.046875	-0.04956	-0.0483398	-0.0554194	-0.0449219
-12.86	-0.00952	-0.0153809	-0.0209961	-0.0397949	-0.0424805	-0.0412598	-0.0483398	-0.0378418
-12.76	-0.00952	-0.020019	-0.0280762	-0.0397949	-0.0424799	-0.0529785	-0.0483393	-0.0378418
-12.66	0.0022	-0.0129391	-0.0249023	-0.0249023	-0.0275875	-0.0380859	-0.0412594	-0.0229492
-12.56	-0.00952	-0.0083	-0.0202637	-0.0319824	-0.0229489	-0.0334473	-0.0366208	-0.026123
-12.46	-0.00171	-0.000488	-0.0124512	-0.0241699	-0.0268555	-0.0256348	-0.0288086	-0.0183105
-12.36	-0.00635	-0.012207	-0.0124512	-0.0241699	-0.0268555	-0.0256348	-0.0288086	-0.0183105
-12.26	-0.0212402	-0.0122069	-0.0124512	-0.0241699	-0.0268553	-0.0256348	-0.0288084	-0.0183105
-12.16	-0.0166016	-0.00757	-0.015625	-0.0195313	-0.0222163	-0.0288086	-0.0241694	-0.0136719
-12.06	-0.00952	-0.000488	-0.00854	-0.0124512	-0.0151363	-0.0217285	-0.0170894	-0.00659
-11.96	0.0022	0.0112305	0.00317	-0.000732	-0.00342	-0.00537	-0.00537	-0.00659
-11.86	0.0022	0.0112305	0.00317	-0.0124512	-0.0151367	0.00171	-0.0170898	-0.00659
-11.76	-0.00952	0.00342	0.00317	-0.0124512	-0.0151367	0.00171	-0.0170898	-0.00659
-11.66	-0.00952	0.00342	-0.00854	-0.0124512	-0.0151367	0.00171	-0.0170898	-0.00659
-11.56	-0.00952	0.00342	-0.00854	-0.0124512	-0.0151364	0.00171	-0.0170895	-0.00659
-11.46	-0.00171	-0.00513	-0.000732	-0.00464	-0.00732	-0.0022	-0.0170898	0.00122
-11.36	-0.00952	-0.0122068	-0.000732	-0.00464	-0.0151365	-0.0022	-0.0170896	0.00122
-11.26	-0.00635	-0.00903	-0.00537	-0.00146	-0.0119627	0.000977	-0.0139158	-0.00342
-11.16	-0.00171	-0.00439	-0.000732	-0.00464	-0.00732	0.00562	-0.00928	0.00122
-11.06	0.0100098	0.00732	0.0109863	0.00708	0.00439	0.017334	0.00244	0.0129395
-10.96	-0.00171	0.00732	-0.000732	0.00708	0.00439	0.017334	0.00244	0.0129395
-10.86	-0.00171	-0.00439	-0.000732	0.00708	-0.00732	0.017334	0.00244	0.0129395
-10.76	-0.00171	-0.00439	-0.000732	0.00708	-0.00732	0.017334	0.00244	0.00122
-10.66	-0.00171	-0.00439	-0.000732	0.00708	-0.00732	0.00952	-0.00928	0.00122
-10.56	-0.00171	-0.00439	-0.000732	-0.00464	-0.00732	0.00952	-0.00928	0.00122
-10.46	-0.00171	-0.00439	-0.00464	0.00317	-0.00732	0.017334	-0.00146	0.00903
-10.36	-0.00171	-0.00439	-0.00464	0.00317	-0.00415	0.017334	-0.00146	0.00903
-10.26	-0.00171	-0.00439	-0.00464	0.00317	0.000489	0.00562	-0.00146	0.00903
-10.16	-0.00171	0.00732	0.00708	0.0148926	0.012207	0.017334	0.0102539	0.020752
-10.06	-0.00171	0.00732	-0.000732	0.00708	0.012207	0.017334	0.0102539	0.020752
-9.96001	-0.00171	0.000244	-0.000732	0.00708	0.0122068	0.017334	0.0102537	0.00903
-9.86001	-0.00488	0.00415	-0.00391	0.00391	0.00903	0.0141602	0.00708	0.00586
-9.76001	-0.00562	0.0112305	0.00317	-0.000732	0.00439	0.0212402	0.0141602	0.0129395
-9.66001	-0.00562	0.0112305	-0.00854	-0.000732	0.00439	0.0212402	0.00635	0.0129395
-9.56001	-0.00562	0.00342	-0.00854	-0.000732	0.00439	0.0134277	0.00635	0.0129395
-9.46001	-0.00244	0.00659	-0.00537	0.00244	0.00757	0.0166016	0.00952	0.0161133
-9.36001	-0.00171	0.019043	0.00708	0.0180664	0.0200195	0.0290527	0.0219727	0.020752
-9.26001	-0.00171	0.00732	-0.000732	0.0227051	0.012207	0.0290527	0.0219727	0.020752
-9.16001	-0.00171	0.00732	-0.000732	0.0227051	0.0168457	0.0290527	0.0102539	0.020752
-9.06001	-0.00171	0.00732	-0.000732	0.0148926	0.0239258	0.017334	0.0102539	0.020752
-8.96001	-0.00171	0.00733	0.00391	0.0148926	0.0239267	0.017334	0.0102548	0.020752
-8.86001	-0.00171	0.019043	0.0180664	0.0266113	0.0356445	0.0290527	0.0219727	0.027832
-8.76001	-0.00171	0.00659	0.0109863	0.0234375	0.0192871	0.0290527	0.0219727	0.020752
-8.66001	-0.00171	-0.000488	-0.000732	0.00708	0.0122076	0.0290527	0.0219733	0.020752
-8.56001	0.0061	0.00732	0.00708	0.0148926	0.0200195	0.0322266	0.0297852	0.0285645
-8.46001	-0.00171	-0.00439	0.00708	0.0148926	0.0200199	0.0180664	0.0297855	0.0285645
-8.36001	0.00293	0.000244	0.0117188	0.0195313	0.0246584	0.0251465	0.034424	0.0332031
-8.26001	0.00537	0.00269	0.0141602	0.0219727	0.0270995	0.0205078	0.0368651	0.0356445
-8.16001	0.00293	0.000245	0.0117188	0.0195313	0.0168468	0.0180664	0.0344249	0.0332031
-8.06001	0.0170898	0.014404	0.0180664	0.0336914	0.0310056	0.0322266	0.0485837	0.0356445
-7.96001	-0.00171	-0.00439	0.0109863	0.0266113	0.0239258	0.0251465	0.0415039	0.0285645
-7.86001	-0.00171	-0.00439	0.0109863	0.0266113	0.0239258	0.017334	0.0415039	0.0253906
-7.76001	-0.00171	-0.00439	0.0109863	0.0266113	0.023926	0.017334	0.0415041	0.020752
-7.66001	-0.00171	0.000245	0.015625	0.03125	0.0168462	0.0219727	0.0461431	0.0253906
-7.56001	-0.00171	-0.000488	0.0195313	0.0266113	0.0239261	0.0290527	0.053223	0.027832
-7.46001	-0.00171	0.00415	0.0109863	0.0344238	0.0317383	0.0368652	0.0532227	0.020752
-7.36001	-0.00171	-0.000488	0.0109863	0.0297852	0.0317383	0.0368652	0.048584	0.020752
-7.26001	-0.00171	-0.000488	0.00635	0.0227051	0.0317387	0.0368652	0.0415044	0.020752
-7.16001	0.00684	0.00659	0.0109863	0.0266113	0.0434574	0.048584	0.053223	0.0324707
-7.06001	0.00684	0.00415	0.015625	0.03125	0.048096	0.0368652	0.0461428	0.0324707
-6.96001	0.013916	0.0112307	0.0227051	0.0383301	0.0520022	0.0368652	0.0485842	0.0324707
-6.86001	0.00537	0.0144052	0.0180664	0.0383301	0.0388193	0.0400391	0.0446787	0.0356445
-6.76001	0.0178223	0.0151367	0.0258789	0.0461426	0.0512695	0.0524902	0.0571289	0.0332031
-6.66001	0.0131836	0.00732	0.00708	0.0344238	0.043457	0.0415039	0.0539551	0.0285645
-6.56001	-0.00171	0.00269	0.00708	0.0297852	0.0388188	0.0368652	0.0493169	0.0285645
-6.46001	0.0100098	0.00732	0.0187988	0.0344238	0.0434574	0.048584	0.0493168	0.0402832
-6.36001	0.0146484	0.0119634	0.0234375	0.03125	0.0480962	0.0532227	0.0539556	0.0449219
-6.26001	0.00684	0.019043	0.0273438	0.0383301	0.0551758	0.0603027	0.0610352	0.052002
-6.16001	0.0022	0.01587	0.0109863	0.0383301	0.0551767	0.0439453	0.0563974	0.0473633
-6.06001	0.013916	0.0229492	0.0227051	0.0500488	0.0668945	0.048584	0.0532227	0.052002
-5.96001	0.013916	0.0112305	0.0227051	0.0500488	0.052002	0.048584	0.0532227	0.052002
-5.86001	0.0061	0.0112305	0.0148926	0.0500488	0.0473633	0.048584	0.0532227	0.0441895
-5.76001	0.0061	0.0112313	0.0148926	0.0500488	0.0473641	0.048584	0.0532235	0.0441895
-5.66	0.0170898	0.0222168	0.0258789	0.0610352	0.0583496	0.0595703	0.064209	0.0551758
-5.56001	0.0217285	0.0268555	0.0305176	0.0539551	0.0629883	0.064209	0.0688477	0.0598145
-5.46001	0.0100098	0.019043	0.0305176	0.0539551	0.0629883	0.0532227	0.0688477	0.0598145
-5.36001	0.0100098	0.019043	0.0187988	0.0539551	0.0629883	0.048584	0.0688477	0.0598145
-5.26001	0.00537	0.00732	0.0187988	0.0507813	0.0551758	0.048584	0.0571289	0.0480957
-5.16	-0.00171	0.00732	0.0187988	0.0461426	0.0551758	0.048584	0.0571289	0.0449219
-5.06001	0.0100098	0.019043	0.0305176	0.0578613	0.0668945	0.0603027	0.0688477	0.052002
-4.96001	-0.00171	0.019043	0.0305176	0.0578613	0.0668945	0.048584	0.0656738	0.052002
-4.86001	-0.00171	0.0112308	0.0305176	0.0500488	0.0668949	0.048584	0.0610355	0.052002
-4.76001	0.00293	0.0158697	0.0305176	0.0546875	0.0715337	0.0532227	0.0656744	0.0488281
-4.66	0.00684	0.0183105	0.0305176	0.0617676	0.0739746	0.0603027	0.0727539	0.0559082
-4.56001	-0.00562	0.0112311	0.0305176	0.0617676	0.0715338	0.0603027	0.0727545	0.0559082
-4.46001	0.0022	0.00732	0.0305176	0.0649414	0.0700684	0.0563965	0.0805664	0.052002
-4.36001	0.0022	0.00732	0.0305176	0.0578613	0.0629883	0.0563965	0.0727539	0.0473633
-4.26001	-0.00244	0.00732	0.0273438	0.0461426	0.0629885	0.0563965	0.0727541	0.0402832
-4.16	-0.00635	0.010498	0.0258789	0.0493164	0.0661621	0.0471191	0.0759277	0.043457
-4.06001	-0.00171	0.0236816	0.0422363	0.0656738	0.0793457	0.0563965	0.0876465	0.0598145
-3.96001	-0.00171	0.019043	0.0305176	0.0610352	0.074707	0.0563965	0.0805664	0.0598145
-3.86001	-0.00171	0.00732	0.0258789	0.0539551	0.0668945	0.0532227	0.0805664	0.0566406
-3.76001	-0.00488	0.00732	0.0187988	0.0507813	0.0668945	0.048584	0.0805664	0.0473633
-3.66	-0.00952	-0.000488	0.0187988	0.0461426	0.0622559	0.0368652	0.0773926	0.0402832
-3.56001	-0.00171	0.0119634	0.03125	0.0585938	0.0676275	0.0446777	0.0734869	0.0527344
-3.46001	-0.00171	0.0144043	0.0351563	0.0610352	0.0629883	0.0446777	0.0759277	0.0449219
-3.36001	-0.00171	0.00733	0.0305176	0.0539551	0.0583505	0.0415039	0.0688486	0.0402832
-3.26001	-0.00244	0.0190432	0.0297852	0.0625	0.0629885	0.048584	0.0805666	0.0473633
-3.16	-0.00952	0.019043	0.0258789	0.0532227	0.0629883	0.0393066	0.0805664	0.043457
-3.06001	-0.00488	0.00732	0.0351563	0.0461426	0.0676275	0.0415039	0.0805669	0.0480957
-2.96001	-0.0141602	0.00733	0.0454102	0.0461426	0.0622571	0.048584	0.0805677	0.0480957
-2.86001	-0.00488	0.0126961	0.0437012	0.0593262	0.0683601	0.0603027	0.0891121	0.0612793
-2.76001	0.0022	0.0183119	0.0493164	0.0649414	0.0817884	0.048584	0.0876478	0.0622559
-2.66	0.0146484	0.019043	0.0617676	0.0773926	0.0864258	0.0610352	0.100098	0.0690918
-2.56001	0.0319824	0.0175788	0.0500488	0.0759277	0.0896003	0.0634766	0.100098	0.074707
-2.46001	0.0192871	0.0166027	0.0500488	0.0749512	0.0910656	0.0610352	0.100099	0.0793457
-2.36001	0.0249023	0.0190445	0.0578613	0.0773926	0.0896011	0.0712891	0.104738	0.0839844
-2.26001	0.0412598	0.0222192	0.0695801	0.0805664	0.0871606	0.0805664	0.110354	0.0910645
-2.16	0.0412598	0.0385742	0.0976563	0.0969238	0.105957	0.102539	0.124268	0.105957
-2.06001	0.0412598	0.0549329	0.103271	0.0969238	0.105958	0.107178	0.143068	0.110596
-1.96001	0.0380859	0.0424812	0.0976563	0.09375	0.0981453	0.104004	0.135255	0.107422
-1.86001	0.0366211	0.0339359	0.0930176	0.0876465	0.0896	0.0979004	0.123536	0.0981445
-1.76001	0.0288086	0.0339359	0.0812988	0.0820313	0.0778812	0.095459	0.107178	0.0981445
-1.66	0.0100098	0.0314941	0.0812988	0.0820313	0.0722656	0.0891113	0.100098	0.0957031
-1.56001	0.0146484	0.0463873	0.0891113	0.100098	0.0825201	0.0993652	0.0969244	0.098877
-1.46001	0.0202637	0.0502924	0.0766602	0.100098	0.0771479	0.0947266	0.107177	0.102783
-1.36001	0.00293	0.0612802	0.0578613	0.0734863	0.0708017	0.0830078	0.0883798	0.105957
-1.26001	-0.0166016	0.0791019	0.0429688	0.0898438	0.094971	0.0610352	0.116455	0.100342
-1.16	-0.017334	0.0698242	0.0344238	0.0773926	0.105957	0.0603027	0.0844727	0.0981445
-1.06001	-0.0266113	0.0847178	0.00635	0.0656738	0.0942392	0.0517578	0.0759287	0.0786133
-0.960007	-0.0393066	0.101807	0.00708	0.0656738	0.106689	0.0375977	0.0852051	0.0871582
-0.860008	-0.0446777	0.084718	-0.0195313	0.0539551	0.0825207	0.017334	0.0759289	0.0410156
-0.76001	-0.0681152	0.0385748	-0.0773926	0.0351563	0.0637212	-0.0444336	0.0695806	-0.00659
-0.660004	-0.0791016	-0.0668945	-0.0749512	-0.0319824	0.00684	-0.0529785	0.048584	-0.0332031
-0.560005	0.0256348	-0.0114726	0.0532227	0.0148926	0.0559102	0.0563965	-0.0209941	0.0488281
-0.460007	0.0483398	0.0612793	0.0852051	0.0610352	0.156006	0.121338	0.0336914	0.11377
-0.360008	0	0	0	0	0	0	0	0
-0.26001	0	0	0	0	0	0	0	0
-0.160004	0	0	0	0	0	0	0	0
-0.0600052	0	0	0	0	0	0	0	0
0.0399933	1.842	2.823	3.207	4.422	6.795	10.08	15.48	26.4
0.139992	1.84203	2.82306	3.20712	4.42399	6.79899	10.088	15.4959	26.4319
0.23999	1.84206	2.82312	3.20725	4.42599	6.80297	10.0959	15.5119	26.4636
0.339996	1.84209	2.82319	3.20737	4.42798	6.80696	10.1039	15.5277	26.4952
0.439995	1.84212	2.82325	3.2075	4.42997	6.81094	10.1118	15.5436	26.5268
0.539993	1.84216	2.82331	3.20762	4.43196	6.81491	10.1198	15.5594	26.5582
0.639992	1.84219	2.82337	3.20775	4.43395	6.81889	10.1277	15.5752	26.5895
0.73999	1.84222	2.82344	3.20787	4.43594	6.82286	10.1356	15.591	26.6207
0.839996	1.84225	2.8235	3.208	4.43793	6.82683	10.1436	15.6067	26.6519
0.939995	1.84228	2.82356	3.20812	4.43991	6.8308	10.1515	15.6224	26.6829
1.03999	1.84231	2.82362	3.20824	4.4419	6.83476	10.1594	15.6381	26.7138
1.13999	1.84234	2.82368	3.20837	4.44388	6.83872	10.1673	15.6538	26.7445
1.23999	1.84237	2.82375	3.20849	4.44587	6.84268	10.1751	15.6694	26.7752
1.34	1.8424	2.82381	3.20862	4.44785	6.84664	10.183	15.685	26.8058
1.43999	1.84244	2.82387	3.20874	4.44983	6.85059	10.1909	15.7006	26.8363
1.53999	1.84247	2.82393	3.20887	4.45182	6.85454	10.1987	15.7161	26.8667
1.63999	1.8425	2.824	3.20899	4.4538	6.85849	10.2066	15.7316	26.897
1.73999	1.84253	2.82406	3.20911	4.45578	6.86244	10.2144	15.7471	26.9271
1.84	1.84256	2.82412	3.20924	4.45776	6.86638	10.2223	15.7625	26.9572
1.93999	1.84259	2.82418	3.20936	4.45973	6.87033	10.2301	15.778	26.9872
2.03999	1.84262	2.82424	3.20949	4.46171	6.87427	10.2379	15.7934	27.017
2.13999	1.84265	2.82431	3.20961	4.46369	6.8782	10.2457	15.8087	27.0468
2.23999	1.84268	2.82437	3.20973	4.46566	6.88214	10.2535	15.8241	27.0765
2.34	1.84271	2.82443	3.20986	4.46764	6.88607	10.2613	15.8394	27.106
2.43999	1.84275	2.82449	3.20998	4.46961	6.89	10.2691	15.8547	27.1355
2.53999	1.84278	2.82455	3.21011	4.47158	6.89392	10.2769	15.8699	27.1648
2.63999	1.84281	2.82461	3.21023	4.47355	6.89785	10.2846	15.8852	27.1941
2.73999	1.84284	2.82468	3.21035	4.47552	6.90177	10.2924	15.9004	27.2233
2.84	1.84287	2.82474	3.21048	4.47749	6.90568	10.3002	15.9155	27.2523
2.93999	1.8429	2.8248	3.2106	4.47946	6.9096	10.3079	15.9307	27.2813
3.03999	1.84293	2.82486	3.21072	4.48143	6.91351	10.3156	15.9458	27.3102
3.13999	1.84296	2.82492	3.21085	4.4834	6.91743	10.3234	15.9609	27.3389
3.23999	1.84299	2.82499	3.21097	4.48537	6.92133	10.3311	15.976	27.3676
3.34	1.84302	2.82505	3.2111	4.48733	6.92524	10.3388	15.991	27.3962
3.43999	1.84305	2.82511	3.21122	4.4893	6.92914	10.3465	16.006	27.4247
3.53999	1.84309	2.82517	3.21134	4.49126	6.93304	10.3542	16.021	27.453
3.63999	1.84312	2.82523	3.21147	4.49322	6.93694	10.3619	16.0359	27.4813
3.73999	1.84315	2.82529	3.21159	4.49518	6.94084	10.3696	16.0509	27.5095
3.84	1.84318	2.82536	3.21171	4.49715	6.94473	10.3772	16.0658	27.5376
3.93999	1.84321	2.82542	3.21184	4.49911	6.94862	10.3849	16.0806	27.5656
4.03999	1.84324	2.82548	3.21196	4.50106	6.95251	10.3926	16.0955	27.5935
4.13999	1.84327	2.82554	3.21208	4.50302	6.9564	10.4002	16.1103	27.6213
4.23999	1.8433	2.8256	3.21221	4.50498	6.96028	10.4079	16.1251	27.649
4.34	1.84333	2.82566	3.21233	4.50694	6.96416	10.4155	16.1399	27.6767
4.43999	1.84336	2.82573	3.21245	4.50889	6.96804	10.4231	16.1546	27.7042
4.53999	1.84339	2.82579	3.21258	4.51085	6.97192	10.4307	16.1693	27.7316
4.63999	1.84342	2.82585	3.2127	4.5128	6.97579	10.4383	16.184	27.759
4.73999	1.84346	2.82591	3.21282	4.51476	6.97966	10.4459	16.1986	27.7862
4.84	1.84349	2.82597	3.21294	4.51671	6.98353	10.4535	16.2133	27.8134
4.93999	1.84352	2.82603	3.21307	4.51866	6.98739	10.4611	16.2279	27.8404
5.03999	1.84355	2.8261	3.21319	4.52061	6.99126	10.4687	16.2425	27.8674
5.13999	1.84358	2.82616	3.21331	4.52256	6.99512	10.4763	16.257	27.8943
5.23999	1.84361	2.82622	3.21344	4.52451	6.99898	10.4838	16.2715	27.9211
5.34	1.84364	2.82628	3.21356	4.52646	7.00283	10.4914	16.286	27.9478
5.43999	1.84367	2.82634	3.21368	4.5284	7.00668	10.4989	16.3005	27.9744
5.53999	1.8437	2.8264	3.21381	4.53035	7.01054	10.5065	16.3149	28.0009
5.63999	1.84373	2.82646	3.21393	4.53229	7.01438	10.514	16.3294	28.0273
5.73999	1.84376	2.82653	3.21405	4.53424	7.01823	10.5215	16.3438	28.0537
5.84	1.84379	2.82659	3.21417	4.53618	7.02207	10.529	16.3581	28.0799
5.93999	1.84382	2.82665	3.2143	4.53812	7.02591	10.5365	16.3725	28.1061
6.03999	1.84386	2.82671	3.21442	4.54007	7.02975	10.544	16.3868	28.1321
6.13999	1.84389	2.82677	3.21454	4.54201	7.03359	10.5515	16.4011	28.1581
6.23999	1.84392	2.82683	3.21466	4.54395	7.03742	10.559	16.4153	28.184
6.34	1.84395	2.82689	3.21479	4.54589	7.04125	10.5665	16.4296	28.2098
6.43999	1.84398	2.82696	3.21491	4.54782	7.04508	10.574	16.4438	28.2355
6.53999	1.84401	2.82702	3.21503	4.54976	7.04891	10.5814	16.4579	28.2612
6.63999	1.84404	2.82708	3.21515	4.5517	7.05273	10.5889	16.4721	28.2867
6.73999	1.84407	2.82714	3.21528	4.55363	7.05655	10.5963	16.4862	28.3122
6.84	1.8441	2.8272	3.2154	4.55557	7.06037	10.6038	16.5003	28.3375
6.93999	1.84413	2.82726	3.21552	4.5575	7.06419	10.6112	16.5144	28.3628
7.03999	1.84416	2.82732	3.21564	4.55944	7.068	10.6186	16.5285	28.388
7.13999	1.84419	2.82738	3.21577	4.56137	7.07181	10.626	16.5425	28.4131
7.23999	1.84422	2.82745	3.21589	4.5633	7.07562	10.6334	16.5565	28.4382
7.34	1.84425	2.82751	3.21601	4.56523	7.07942	10.6408	16.5705	28.4631
7.43999	1.84428	2.82757	3.21613	4.56716	7.08323	10.6482	16.5844	28.488
7.53999	1.84431	2.82763	3.21626	4.56909	7.08703	10.6556	16.5984	28.5127
7.63999	1.84435	2.82769	3.21638	4.57102	7.09083	10.663	16.6123	28.5374
7.73999	1.84438	2.82775	3.2165	4.57294	7.09462	10.6703	16.6261	28.562
7.84	1.84441	2.82781	3.21662	4.57487	7.09842	10.6777	16.64	28.5866
7.93999	1.84444	2.82787	3.21674	4.57679	7.10221	10.6851	16.6538	28.611
8.03999	1.84447	2.82793	3.21687	4.57872	7.106	10.6924	16.6676	28.6354
8.13999	1.8445	2.828	3.21699	4.58064	7.10979	10.6997	16.6814	28.6596
8.23999	1.84453	2.82806	3.21711	4.58256	7.11357	10.7071	16.6951	28.6838
8.34	1.84456	2.82812	3.21723	4.58449	7.11735	10.7144	16.7089	28.7079
8.43999	1.84459	2.82818	3.21735	4.58641	7.12113	10.7217	16.7226	28.732
8.53999	1.84462	2.82824	3.21748	4.58833	7.12491	10.729	16.7362	28.7559
8.63999	1.84465	2.8283	3.2176	4.59025	7.12868	10.7363	16.7499	28.7798
8.73999	1.84468	2.82836	3.21772	4.59216	7.13245	10.7436	16.7635	28.8036
8.84	1.84471	2.82842	3.21784	4.59408	7.13622	10.7509	16.7771	28.8273
8.93999	1.84474	2.82848	3.21796	4.596	7.13999	10.7582	16.7907	28.8509
9.03999	1.84477	2.82854	3.21808	4.59791	7.14375	10.7654	16.8042	28.8744
9.13999	1.8448	2.8286	3.21821	4.59983	7.14752	10.7727	16.8178	28.8979
9.23999	1.84483	2.82867	3.21833	4.60174	7.15128	10.78	16.8313	28.9213
9.34	1.84486	2.82873	3.21845	4.60366	7.15503	10.7872	16.8447	28.9446
9.43999	1.84489	2.82879	3.21857	4.60557	7.15879	10.7944	16.8582	28.9678
9.53999	1.84492	2.82885	3.21869	4.60748	7.16254	10.8017	16.8716	28.991
9.63999	1.84495	2.82891	3.21881	4.60939	7.16629	10.8089	16.885	29.014
9.73999	1.84499	2.82897	3.21894	4.6113	7.17004	10.8161	16.8984	29.037
9.84	1.84502	2.82903	3.21906	4.61321	7.17378	10.8233	16.9118	29.0599
9.93999	1.84505	2.82909	3.21918	4.61512	7.17753	10.8305	16.9251	29.0828
10.04	1.84508	2.82915	3.2193	4.61702	7.18127	10.8377	16.9384	29.1055
10.14	1.84511	2.82921	3.21942	4.61893	7.185	10.8449	16.9517	29.1282
10.24	1.84514	2.82927	3.21954	4.62083	7.18874	10.8521	16.9649	29.1508
10.34	1.84517	2.82933	3.21966	4.62274	7.19247	10.8592	16.9782	29.1733
10.44	1.8452	2.82939	3.21979	4.62464	7.1962	10.8664	16.9914	29.1958
10.54	1.84523	2.82946	3.21991	4.62655	7.19993	10.8736	17.0045	29.2182
10.64	1.84526	2.82952	3.22003	4.62845	7.20366	10.8807	17.0177	29.2405
10.74	1.84529	2.82958	3.22015	4.63035	7.20738	10.8879	17.0308	29.2627
10.84	1.84532	2.82964	3.22027	4.63225	7.2111	10.895	17.044	29.2848
10.94	1.84535	2.8297	3.22039	4.63415	7.21482	10.9021	17.057	29.3069
11.04	1.84538	2.82976	3.22051	4.63605	7.21854	10.9092	17.0701	29.3289
11.14	1.84541	2.82982	3.22063	4.63794	7.22225	10.9163	17.0832	29.3508
11.24	1.84544	2.82988	3.22075	4.63984	7.22596	10.9235	17.0962	29.3727
11.34	1.84547	2.82994	3.22088	4.64174	7.22967	10.9306	17.1092	29.3944
11.44	1.8455	2.83	3.221	4.64363	7.23338	10.9376	17.1221	29.4161
11.54	1.84553	2.83006	3.22112	4.64553	7.23708	10.9447	17.1351	29.4378
11.64	1.84556	2.83012	3.22124	4.64742	7.24078	10.9518	17.148	29.4593
11.74	1.84559	2.83018	3.22136	4.64931	7.24448	10.9589	17.1609	29.4808
11.84	1.84562	2.83024	3.22148	4.6512	7.24818	10.9659	17.1738	29.5022
11.94	1.84565	2.8303	3.2216	4.65309	7.25187	10.973	17.1866	29.5235
12.04	1.84568	2.83036	3.22172	4.65498	7.25557	10.98	17.1994	29.5448
12.14	1.84571	2.83042	3.22184	4.65687	7.25926	10.9871	17.2123	29.566
12.24	1.84574	2.83048	3.22196	4.65876	7.26294	10.9941	17.225	29.5871
12.34	1.84577	2.83054	3.22208	4.66065	7.26663	11.0011	17.2378	29.6082
12.44	1.8458	2.8306	3.2222	4.66254	7.27031	11.0081	17.2505	29.6291
12.54	1.84583	2.83067	3.22232	4.66442	7.27399	11.0151	17.2632	29.65
12.64	1.84586	2.83073	3.22245	4.66631	7.27767	11.0221	17.2759	29.6709
12.74	1.84589	2.83079	3.22257	4.66819	7.28134	11.0291	17.2886	29.6916
12.84	1.84592	2.83085	3.22269	4.67007	7.28502	11.0361	17.3012	29.7123
12.94	1.84595	2.83091	3.22281	4.67196	7.28869	11.0431	17.3139	29.7329
13.04	1.84598	2.83097	3.22293	4.67384	7.29236	11.0501	17.3264	29.7535
13.14	1.84601	2.83103	3.22305	4.67572	7.29602	11.057	17.339	29.774
13.24	1.84604	2.83109	3.22317	4.6776	7.29969	11.064	17.3516	29.7944
13.34	1.84607	2.83115	3.22329	4.67948	7.30335	11.071	17.3641	29.8147
13.44	1.8461	2.83121	3.22341	4.68135	7.30701	11.0779	17.3766	29.835
13.54	1.84613	2.83127	3.22353	4.68323	7.31066	11.0848	17.3891	29.8552
13.64	1.84616	2.83133	3.22365	4.68511	7.31432	11.0918	17.4015	29.8753
13.74	1.84619	2.83139	3.22377	4.68698	7.31797	11.0987	17.414	29.8954
13.84	1.84622	2.83145	3.22389	4.68886	7.32162	11.1056	17.4264	29.9154
13.94	1.84626	2.83151	3.22401	4.69073	7.32527	11.1125	17.4388	29.9353
14.04	1.84629	2.83157	3.22413	4.69261	7.32891	11.1194	17.4512	29.9552
14.14	1.84632	2.83163	3.22425	4.69448	7.33255	11.1263	17.4635	29.975
14.24	1.84635	2.83169	3.22437	4.69635	7.33619	11.1332	17.4758	29.9947
14.34	1.84638	2.83175	3.22449	4.69822	7.33983	11.1401	17.4881	30.0144
14.44	1.84641	2.83181	3.22461	4.70009	7.34347	11.1469	17.5004	30.034
14.54	1.84644	2.83187	3.22473	4.70196	7.3471	11.1538	17.5127	30.0535
14.64	1.84647	2.83193	3.22485	4.70383	7.35073	11.1607	17.5249	30.073
14.74	1.8465	2.83199	3.22497	4.70569	7.35436	11.1675	17.5371	30.0924
14.84	1.84653	2.83205	3.22509	4.70756	7.35798	11.1744	17.5493	30.1117
14.94	1.84656	2.83211	3.22521	4.70942	7.36161	11.1812	17.5615	30.131
15.04	1.84659	2.83217	3.22533	4.71129	7.36523	11.188	17.5736	30.1502
15.14	1.84662	2.83223	3.22545	4.71315	7.36885	11.1948	17.5857	30.1693
15.24	1.84665	2.83229	3.22557	4.71502	7.37246	11.2017	17.5978	30.1884
15.34	1.84668	2.83235	3.22569	4.71688	7.37608	11.2085	17.6099	30.2074
15.44	1.84671	2.83241	3.22581	4.71874	7.37969	11.2153	17.622	30.2264
15.54	1.84674	2.83247	3.22593	4.7206	7.3833	11.2221	17.634	30.2452
15.64	1.84677	2.83253	3.22605	4.72246	7.38691	11.2288	17.646	30.264
15.74	1.8468	2.83259	3.22617	4.72432	7.39051	11.2356	17.658	30.2828
15.84	1.84682	2.83265	3.22629	4.72618	7.39411	11.2424	17.67	30.3015
15.94	1.84685	2.83271	3.22641	4.72803	7.39772	11.2492	17.6819	30.3201
16.04	1.84688	2.83277	3.22652	4.72989	7.40131	11.2559	17.6938	30.3387
16.14	1.84691	2.83283	3.22664	4.73174	7.40491	11.2627	17.7057	30.3572
16.24	1.84694	2.83289	3.22676	4.7336	7.4085	11.2694	17.7176	30.3756
16.34	1.84697	2.83295	3.22688	4.73545	7.41209	11.2762	17.7295	30.394
16.44	1.847	2.83301	3.227	4.73731	7.41568	11.2829	17.7413	30.4123
16.54	1.84703	2.83307	3.22712	4.73916	7.41927	11.2896	17.7531	30.4305
16.64	1.84706	2.83313	3.22724	4.74101	7.42285	11.2963	17.7649	30.4487
16.74	1.84709	2.83319	3.22736	4.74286	7.42643	11.303	17.7767	30.4668
16.84	1.84712	2.83324	3.22748	4.74471	7.43001	11.3097	17.7884	30.4849
16.94	1.84715	2.8333	3.2276	4.74656	7.43359	11.3164	17.8002	30.5029
17.04	1.84718	2.83336	3.22772	4.74841	7.43716	11.3231	17.8119	30.5208
17.14	1.84721	2.83342	3.22784	4.75025	7.44074	11.3298	17.8236	30.5387
17.24	1.84724	2.83348	3.22796	4.7521	7.44431	11.3365	17.8352	30.5565
17.34	1.84727	2.83354	3.22807	4.75394	7.44787	11.3431	17.8469	30.5743
17.44	1.8473	2.8336	3.22819	4.75579	7.45144	11.3498	17.8585	30.592
17.54	1.84733	2.83366	3.22831	4.75763	7.455	11.3565	17.8701	30.6096
17.64	1.84736	2.83372	3.22843	4.75947	7.45856	11.3631	17.8817	30.6272
17.74	1.84739	2.83378	3.22855	4.76132	7.46212	11.3698	17.8932	30.6447
17.84	1.84742	2.83384	3.22867	4.76316	7.46568	11.3764	17.9048	30.6622
17.94	1.84745	2.8339	3.22879	4.765	7.46923	11.383	17.9163	30.6796
18.04	1.84748	2.83396	3.22891	4.76684	7.47278	11.3896	17.9278	30.6969
18.14	1.84751	2.83402	3.22903	4.76868	7.47633	11.3962	17.9393	30.7142
18.24	1.84754	2.83408	3.22914	4.77051	7.47988	11.4028	17.9507	30.7314
18.34	1.84757	2.83414	3.22926	4.77235	7.48343	11.4094	17.9622	30.7486
18.44	1.8476	2.8342	3.22938	4.77419	7.48697	11.416	17.9736	30.7657
18.54	1.84763	2.83426	3.2295	4.77602	7.49051	11.4226	17.985	30.7827
18.64	1.84766	2.83432	3.22962	4.77786	7.49405	11.4292	17.9963	30.7997
18.74	1.84769	2.83438	3.22974	4.77969	7.49758	11.4358	18.0077	30.8167
18.84	1.84772	2.83443	3.22986	4.78153	7.50111	11.4423	18.019	30.8335
18.94	1.84775	2.83449	3.22998	4.78336	7.50465	11.4489	18.0303	30.8504
19.04	1.84778	2.83455	3.23009	4.78519	7.50817	11.4554	18.0416	30.8671
19.14	1.84781	2.83461	3.23021	4.78702	7.5117	11.462	18.0529	30.8838
19.24	1.84784	2.83467	3.23033	4.78885	7.51522	11.4685	18.0641	30.9005
19.34	1.84787	2.83473	3.23045	4.79068	7.51875	11.4751	18.0754	30.9171
19.44	1.8479	2.83479	3.23057	4.79251	7.52227	11.4816	18.0866	30.9336
19.54	1.84793	2.83485	3.23069	4.79433	7.52578	11.4881	18.0978	30.9501
19.64	1.84796	2.83491	3.2308	4.79616	7.5293	11.4946	18.1089	30.9665
19.74	1.84799	2.83497	3.23092	4.79798	7.53281	11.5011	18.1201	30.9829
19.84	1.84802	2.83503	3.23104	4.79981	7.53632	11.5076	18.1312	30.9992
19.94	1.84805	2.83509	3.23116	4.80163	7.53983	11.5141	18.1423	31.0154
20.04	1.84807	2.83515	3.23128	4.80346	7.54334	11.5206	18.1534	31.0316
20.14	1.8481	2.83521	3.2314	4.80528	7.54684	11.5271	18.1644	31.0478
20.24	1.84813	2.83526	3.23151	4.8071	7.55034	11.5335	18.1755	31.0639
20.34	1.84816	2.83532	3.23163	4.80892	7.55384	11.54	18.1865	31.0799
20.44	1.84819	2.83538	3.23175	4.81074	7.55734	11.5465	18.1975	31.0959
20.54	1.84822	2.83544	3.23187	4.81256	7.56083	11.5529	18.2085	31.1118
20.64	1.84825	2.8355	3.23199	4.81438	7.56432	11.5593	18.2195	31.1277
20.74	1.84828	2.83556	3.2321	4.81619	7.56781	11.5658	18.2304	31.1435
20.84	1.84831	2.83562	3.23222	4.81801	7.5713	11.5722	18.2413	31.1593
20.94	1.84834	2.83568	3.23234	4.81983	7.57479	11.5786	18.2522	31.175
21.04	1.84837	2.83574	3.23246	4.82164	7.57827	11.585	18.2631	31.1907
21.14	1.8484	2.8358	3.23258	4.82346	7.58175	11.5915	18.274	31.2063
21.24	1.84843	2.83585	3.23269	4.82527	7.58523	11.5979	18.2848	31.2218
21.34	1.84846	2.83591	3.23281	4.82708	7.58871	11.6043	18.2957	31.2373
21.44	1.84849	2.83597	3.23293	4.82889	7.59218	11.6106	18.3065	31.2528
21.54	1.84852	2.83603	3.23305	4.8307	7.59566	11.617	18.3172	31.2682
21.64	1.84855	2.83609	3.23316	4.83251	7.59912	11.6234	18.328	31.2835
21.74	1.84858	2.83615	3.23328	4.83432	7.60259	11.6298	18.3388	31.2988
21.84	1.84861	2.83621	3.2334	4.83613	7.60606	11.6361	18.3495	31.314
21.94	1.84864	2.83627	3.23352	4.83794	7.60952	11.6425	18.3602	31.3292
22.04	1.84867	2.83633	3.23363	4.83975	7.61298	11.6488	18.3709	31.3444
22.14	1.84869	2.83639	3.23375	4.84155	7.61644	11.6552	18.3815	31.3595
22.24	1.84872	2.83644	3.23387	4.84336	7.6199	11.6615	18.3922	31.3745
22.34	1.84875	2.8365	3.23399	4.84516	7.62335	11.6679	18.4028	31.3895
22.44	1.84878	2.83656	3.2341	4.84696	7.6268	11.6742	18.4134	31.4044
22.54	1.84881	2.83662	3.23422	4.84877	7.63025	11.6805	18.424	31.4193
22.64	1.84884	2.83668	3.23434	4.85057	7.6337	11.6868	18.4346	31.4341
22.74	1.84887	2.83674	3.23446	4.85237	7.63715	11.6931	18.4451	31.4489
22.84	1.8489	2.8368	3.23457	4.85417	7.64059	11.6994	18.4557	31.4636
22.94	1.84893	2.83686	3.23469	4.85597	7.64403	11.7057	18.4662	31.4783
23.04	1.84896	2.83691	3.23481	4.85777	7.64747	11.712	18.4767	31.4929
23.14	1.84899	2.83697	3.23493	4.85957	7.6509	11.7183	18.4872	31.5075
23.24	1.84902	2.83703	3.23504	4.86136	7.65434	11.7245	18.4976	31.5221
23.34	1.84905	2.83709	3.23516	4.86316	7.65777	11.7308	18.508	31.5365
23.44	1.84908	2.83715	3.23528	4.86495	7.6612	11.737	18.5185	31.551
23.54	1.84911	2.83721	3.23539	4.86675	7.66463	11.7433	18.5289	31.5654
23.64	1.84914	2.83727	3.23551	4.86854	7.66805	11.7495	18.5392	31.5797
23.74	1.84916	2.83732	3.23563	4.87034	7.67148	11.7558	18.5496	31.594
23.84	1.84919	2.83738	3.23575	4.87213	7.6749	11.762	18.5599	31.6082
23.94	1.84922	2.83744	3.23586	4.87392	7.67832	11.7682	18.5703	31.6224
24.04	1.84925	2.8375	3.23598	4.87571	7.68173	11.7745	18.5806	31.6366
24.14	1.84928	2.83756	3.2361	4.8775	7.68515	11.7807	18.5909	31.6506
24.24	1.84931	2.83762	3.23621	4.87929	7.68856	11.7869	18.6011	31.6647
24.34	1.84934	2.83768	3.23633	4.88108	7.69197	11.7931	18.6114	31.6787
24.44	1.84937	2.83773	3.23645	4.88286	7.69538	11.7993	18.6216	31.6926
24.54	1.8494	2.83779	3.23656	4.88465	7.69878	11.8055	18.6318	31.7065
24.64	1.84943	2.83785	3.23668	4.88644	7.70218	11.8116	18.642	31.7204
24.74	1.84946	2.83791	3.2368	4.88822	7.70559	11.8178	18.6522	31.7342
24.84	1.84949	2.83797	3.23691	4.89001	7.70898	11.824	18.6623	31.748
24.94	1.84952	2.83803	3.23703	4.89179	7.71238	11.8301	18.6725	31.7617
25.04	1.84955	2.83809	3.23715	4.89357	7.71578	11.8363	18.6826	31.7754
25.14	1.84957	2.83814	3.23726	4.89535	7.71917	11.8424	18.6927	31.789
25.24	1.8496	2.8382	3.23738	4.89713	7.72256	11.8486	18.7028	31.8026
25.34	1.84963	2.83826	3.2375	4.89891	7.72595	11.8547	18.7128	31.8161
25.44	1.84966	2.83832	3.23761	4.90069	7.72933	11.8609	18.7229	31.8296
25.54	1.84969	2.83838	3.23773	4.90247	7.73271	11.867	18.7329	31.843
25.64	1.84972	2.83844	3.23785	4.90425	7.7361	11.8731	18.7429	31.8564
25.74	1.84975	2.83849	3.23796	4.90603	7.73947	11.8792	18.7529	31.8698
25.84	1.84978	2.83855	3.23808	4.9078	7.74285	11.8853	18.7629	31.8831
25.94	1.84981	2.83861	3.2382	4.90958	7.74623	11.8914	18.7728	31.8963
26.04	1.84984	2.83867	3.23831	4.91135	7.7496	11.8975	18.7827	31.9095
26.14	1.84987	2.83873	3.23843	4.91313	7.75297	11.9036	18.7927	31.9227
26.24	1.8499	2.83878	3.23854	4.9149	7.75634	11.9097	18.8026	31.9358
26.34	1.84992	2.83884	3.23866	4.91667	7.7597	11.9157	18.8124	31.9489
26.44	1.84995	2.8389	3.23878	4.91844	7.76307	11.9218	18.8223	31.9619
26.54	1.84998	2.83896	3.23889	4.92021	7.76643	11.9279	18.8321	31.9749
26.64	1.85001	2.83902	3.23901	4.92198	7.76979	11.9339	18.842	31.9879
26.74	1.85004	2.83908	3.23913	4.92375	7.77315	11.94	18.8518	32.0008
26.84	1.85007	2.83913	3.23924	4.92552	7.7765	11.946	18.8616	32.0136
26.94	1.8501	2.83919	3.23936	4.92729	7.77985	11.952	18.8713	32.0265
27.04	1.85013	2.83925	3.23947	4.92905	7.7832	11.9581	18.8811	32.0392
27.14	1.85016	2.83931	3.23959	4.93082	7.78655	11.9641	18.8908	32.052
27.24	1.85019	2.83937	3.23971	4.93258	7.7899	11.9701	18.9006	32.0646
27.34	1.85022	2.83942	3.23982	4.93435	7.79324	11.9761	18.9103	32.0773
27.44	1.85024	2.83948	3.23994	4.93611	7.79659	11.9821	18.9199	32.0899
27.54	1.85027	2.83954	3.24005	4.93787	7.79993	11.9881	18.9296	32.1024
27.64	1.8503	2.8396	3.24017	4.93963	7.80326	11.9941	18.9393	32.115
27.74	1.85033	2.83966	3.24028	4.9414	7.8066	12.0001	18.9489	32.1274
27.84	1.85036	2.83971	3.2404	4.94316	7.80993	12.0061	18.9585	32.1399
27.94	1.85039	2.83977	3.24052	4.94492	7.81326	12.012	18.9681	32.1522
28.04	1.85042	2.83983	3.24063	4.94667	7.81659	12.018	18.9777	32.1646
28.14	1.85045	2.83989	3.24075	4.94843	7.81992	12.024	18.9872	32.1769
28.24	1.85048	2.83995	3.24086	4.95019	7.82324	12.0299	18.9968	32.1892
28.34	1.85051	2.84	3.24098	4.95194	7.82657	12.0359	19.0063	32.2014
28.44	1.85053	2.84006	3.24109	4.9537	7.82989	12.0418	19.0158	32.2135
28.54	1.85056	2.84012	3.24121	4.95545	7.83321	12.0477	19.0253	32.2257
28.64	1.85059	2.84018	3.24133	4.95721	7.83652	12.0537	19.0348	32.2378
28.74	1.85062	2.84024	3.24144	4.95896	7.83984	12.0596	19.0442	32.2498
28.84	1.85065	2.84029	3.24156	4.96071	7.84315	12.0655	19.0537	32.2619
28.94	1.85068	2.84035	3.24167	4.96247	7.84646	12.0714	19.0631	32.2738
29.04	1.85071	2.84041	3.24179	4.96422	7.84977	12.0773	19.0725	32.2858
29.14	1.85074	2.84047	3.2419	4.96597	7.85307	12.0832	19.0819	32.2976
29.24	1.85077	2.84052	3.24202	4.96771	7.85638	12.0891	19.0913	32.3095
29.34	1.8508	2.84058	3.24213	4.96946	7.85968	12.095	19.1006	32.3213
29.44	1.85082	2.84064	3.24225	4.97121	7.86298	12.1009	19.1099	32.3331
29.54	1.85085	2.8407	3.24236	4.97296	7.86627	12.1067	19.1193	32.3448
29.64	1.85088	2.84076	3.24248	4.9747	7.86957	12.1126	19.1286	32.3565
29.74	1.85091	2.84081	3.24259	4.97645	7.87286	12.1185	19.1379	32.3682
29.84	1.85094	2.84087	3.24271	4.97819	7.87615	12.1243	19.1471	32.3798
29.94	1.85097	2.84093	3.24282	4.97994	7.87944	12.1302	19.1564	32.3913
30.04	1.851	2.84099	3.24294	4.98168	7.88273	12.136	19.1656	32.4029
30.14	1.85103	2.84104	3.24306	4.98342	7.88601	12.1419	19.1748	32.4144
30.24	1.85105	2.8411	3.24317	4.98516	7.88929	12.1477	19.184	32.4258
30.34	1.85108	2.84116	3.24329	4.9869	7.89257	12.1535	19.1932	32.4372
30.44	1.85111	2.84122	3.2434	4.98864	7.89585	12.1593	19.2024	32.4486
30.54	1.85114	2.84127	3.24351	4.99038	7.89913	12.1651	19.2115	32.46
30.64	1.85117	2.84133	3.24363	4.99212	7.9024	12.1709	19.2207	32.4713
30.74	1.8512	2.84139	3.24374	4.99386	7.90567	12.1767	19.2298	32.4825
30.84	1.85123	2.84145	3.24386	4.99559	7.90894	12.1825	19.2389	32.4938
30.94	1.85126	2.8415	3.24397	4.99733	7.91221	12.1883	19.248	32.5049
31.04	1.85129	2.84156	3.24409	4.99906	7.91547	12.1941	19.257	32.5161
31.14	1.85131	2.84162	3.2442	5.0008	7.91874	12.1999	19.2661	32.5272
31.24	1.85134	2.84168	3.24432	5.00253	7.922	12.2057	19.2751	32.5383
31.34	1.85137	2.84173	3.24443	5.00426	7.92526	12.2114	19.2841	32.5493
31.44	1.8514	2.84179	3.24455	5.006	7.92851	12.2172	19.2931	32.5603
31.54	1.85143	2.84185	3.24466	5.00773	7.93177	12.2229	19.3021	32.5713
31.64	1.85146	2.84191	3.24478	5.00946	7.93502	12.2287	19.3111	32.5822
31.74	1.85149	2.84196	3.24489	5.01119	7.93827	12.2344	19.32	32.5931
31.84	1.85152	2.84202	3.24501	5.01292	7.94152	12.2402	19.329	32.6039
31.94	1.85154	2.84208	3.24512	5.01464	7.94476	12.2459	19.3379	32.6147
32.04	1.85157	2.84214	3.24524	5.01637	7.94801	12.2516	19.3468	32.6255
32.14	1.8516	2.84219	3.24535	5.0181	7.95125	12.2573	19.3557	32.6363
32.24	1.85163	2.84225	3.24546	5.01982	7.95449	12.263	19.3646	32.647
32.34	1.85166	2.84231	3.24558	5.02155	7.95773	12.2687	19.3734	32.6576
32.44	1.85169	2.84237	3.24569	5.02327	7.96096	12.2744	19.3823	32.6683
32.54	1.85172	2.84242	3.24581	5.02499	7.9642	12.2801	19.3911	32.6789
32.64	1.85174	2.84248	3.24592	5.02672	7.96743	12.2858	19.3999	32.6894
32.74	1.85177	2.84254	3.24604	5.02844	7.97066	12.2915	19.4087	32.6999
32.84	1.8518	2.84259	3.24615	5.03016	7.97389	12.2972	19.4175	32.7104
32.94	1.85183	2.84265	3.24626	5.03188	7.97711	12.3028	19.4262	32.7209
33.04	1.85186	2.84271	3.24638	5.0336	7.98033	12.3085	19.435	32.7313
33.14	1.85189	2.84277	3.24649	5.03532	7.98356	12.3142	19.4437	32.7417
33.24	1.85192	2.84282	3.24661	5.03704	7.98677	12.3198	19.4524	32.752
33.34	1.85195	2.84288	3.24672	5.03875	7.98999	12.3255	19.4611	32.7623
33.44	1.85197	2.84294	3.24684	5.04047	7.99321	12.3311	19.4698	32.7726
33.54	1.852	2.84299	3.24695	5.04218	7.99642	12.3367	19.4784	32.7828
33.64	1.85203	2.84305	3.24706	5.0439	7.99963	12.3424	19.4871	32.793
33.74	1.85206	2.84311	3.24718	5.04561	8.00284	12.348	19.4957	32.8032
33.84	1.85209	2.84317	3.24729	5.04733	8.00605	12.3536	19.5043	32.8134
33.94	1.85212	2.84322	3.2474	5.04904	8.00925	12.3592	19.5129	32.8235
34.04	1.85215	2.84328	3.24752	5.05075	8.01245	12.3648	19.5215	32.8335
34.14	1.85217	2.84334	3.24763	5.05246	8.01565	12.3704	19.5301	32.8436
34.24	1.8522	2.84339	3.24775	5.05417	8.01885	12.376	19.5386	32.8536
34.34	1.85223	2.84345	3.24786	5.05588	8.02205	12.3816	19.5472	32.8635
34.44	1.85226	2.84351	3.24797	5.05759	8.02524	12.3872	19.5557	32.8735
34.54	1.85229	2.84357	3.24809	5.0593	8.02843	12.3928	19.5642	32.8834
34.64	1.85232	2.84362	3.2482	5.061	8.03162	12.3983	19.5727	32.8932
34.74	1.85235	2.84368	3.24832	5.06271	8.03481	12.4039	19.5812	32.9031
34.84	1.85237	2.84374	3.24843	5.06442	8.038	12.4094	19.5896	32.9129
34.94	1.8524	2.84379	3.24854	5.06612	8.04118	12.415	19.5981	32.9226
35.04	1.85243	2.84385	3.24866	5.06783	8.04436	12.4205	19.6065	32.9324
35.14	1.85246	2.84391	3.24877	5.06953	8.04754	12.4261	19.6149	32.942
35.24	1.85249	2.84396	3.24888	5.07123	8.05072	12.4316	19.6233	32.9517
35.34	1.85252	2.84402	3.249	5.07293	8.0539	12.4372	19.6317	32.9613
35.44	1.85254	2.84408	3.24911	5.07463	8.05707	12.4427	19.6401	32.9709
35.54	1.85257	2.84413	3.24922	5.07633	8.06024	12.4482	19.6484	32.9805
35.64	1.8526	2.84419	3.24934	5.07803	8.06341	12.4537	19.6567	32.9901
35.74	1.85263	2.84425	3.24945	5.07973	8.06658	12.4592	19.6651	32.9996
35.84	1.85266	2.8443	3.24956	5.08143	8.06974	12.4647	19.6734	33.009
35.94	1.85269	2.84436	3.24968	5.08313	8.07291	12.4702	19.6817	33.0185
36.04	1.85271	2.84442	3.24979	5.08482	8.07607	12.4757	19.6899	33.0279
36.14	1.85274	2.84447	3.2499	5.08652	8.07923	12.4812	19.6982	33.0372
36.24	1.85277	2.84453	3.25002	5.08821	8.08238	12.4867	19.7064	33.0466
36.34	1.8528	2.84459	3.25013	5.08991	8.08554	12.4921	19.7147	33.0559
36.44	1.85283	2.84465	3.25024	5.0916	8.08869	12.4976	19.7229	33.0652
36.54	1.85286	2.8447	3.25036	5.09329	8.09184	12.5031	19.7311	33.0744
36.64	1.85289	2.84476	3.25047	5.09498	8.09499	12.5085	19.7393	33.0836
36.74	1.85291	2.84482	3.25058	5.09668	8.09814	12.514	19.7475	33.0928
36.84	1.85294	2.84487	3.2507	5.09837	8.10128	12.5194	19.7556	33.102
36.94	1.85297	2.84493	3.25081	5.10006	8.10443	12.5248	19.7637	33.1111
37.04	1.853	2.84499	3.25092	5.10174	8.10757	12.5303	19.7719	33.1202
37.14	1.85303	2.84504	3.25103	5.10343	8.11071	12.5357	19.78	33.1293
37.24	1.85306	2.8451	3.25115	5.10512	8.11384	12.5411	19.7881	33.1383
37.34	1.85308	2.84515	3.25126	5.10681	8.11698	12.5465	19.7962	33.1473
37.44	1.85311	2.84521	3.25137	5.10849	8.12011	12.552	19.8042	33.1563
37.54	1.85314	2.84527	3.25149	5.11018	8.12324	12.5574	19.8123	33.1652
37.64	1.85317	2.84532	3.2516	5.11186	8.12637	12.5628	19.8203	33.1741
37.74	1.8532	2.84538	3.25171	5.11354	8.1295	12.5682	19.8283	33.183
37.84	1.85323	2.84544	3.25182	5.11523	8.13262	12.5735	19.8364	33.1918
37.94	1.85325	2.84549	3.25194	5.11691	8.13574	12.5789	19.8444	33.2007
38.04	1.85328	2.84555	3.25205	5.11859	8.13886	12.5843	19.8523	33.2094
38.14	1.85331	2.84561	3.25216	5.12027	8.14198	12.5897	19.8603	33.2182
38.24	1.85334	2.84566	3.25227	5.12195	8.1451	12.595	19.8682	33.2269
38.34	1.85337	2.84572	3.25239	5.12363	8.14821	12.6004	19.8762	33.2356
38.44	1.85339	2.84578	3.2525	5.12531	8.15133	12.6057	19.8841	33.2443
38.54	1.85342	2.84583	3.25261	5.12698	8.15444	12.6111	19.892	33.2529
38.64	1.85345	2.84589	3.25272	5.12866	8.15755	12.6164	19.8999	33.2616
38.74	1.85348	2.84595	3.25284	5.13034	8.16065	12.6218	19.9078	33.2701
38.84	1.85351	2.846	3.25295	5.13201	8.16376	12.6271	19.9156	33.2787
38.94	1.85354	2.84606	3.25306	5.13369	8.16686	12.6324	19.9235	33.2872
39.04	1.85356	2.84611	3.25317	5.13536	8.16996	12.6378	19.9313	33.2957
39.14	1.85359	2.84617	3.25329	5.13703	8.17306	12.6431	19.9392	33.3042
39.24	1.85362	2.84623	3.2534	5.1387	8.17616	12.6484	19.947	33.3126
39.34	1.85365	2.84628	3.25351	5.14038	8.17925	12.6537	19.9548	33.321
39.44	1.85368	2.84634	3.25362	5.14205	8.18234	12.659	19.9625	33.3294
39.54	1.8537	2.8464	3.25374	5.14372	8.18543	12.6643	19.9703	33.3378
39.64	1.85373	2.84645	3.25385	5.14538	8.18852	12.6696	19.978	33.3461
39.74	1.85376	2.84651	3.25396	5.14705	8.19161	12.6748	19.9858	33.3544
39.84	1.85379	2.84656	3.25407	5.14872	8.19469	12.6801	19.9935	33.3626
39.94	1.85382	2.84662	3.25418	5.15039	8.19777	12.6854	20.0012	33.3709
40.04	1.85385	2.84668	3.2543	5.15205	8.20086	12.6907	20.0089	33.3791
40.14	1.85387	2.84673	3.25441	5.15372	8.20393	12.6959	20.0166	33.3873
40.24	1.8539	2.84679	3.25452	5.15538	8.20701	12.7012	20.0242	33.3954
40.34	1.85393	2.84685	3.25463	5.15705	8.21008	12.7064	20.0319	33.4036
40.44	1.85396	2.8469	3.25474	5.15871	8.21316	12.7117	20.0395	33.4117
40.54	1.85399	2.84696	3.25486	5.16037	8.21623	12.7169	20.0472	33.4197
40.64	1.85401	2.84701	3.25497	5.16203	8.2193	12.7221	20.0548	33.4278
40.74	1.85404	2.84707	3.25508	5.16369	8.22236	12.7274	20.0624	33.4358
40.84	1.85407	2.84713	3.25519	5.16535	8.22543	12.7326	20.0699	33.4438
40.94	1.8541	2.84718	3.2553	5.16701	8.22849	12.7378	20.0775	33.4518
41.04	1.85413	2.84724	3.25542	5.16867	8.23155	12.743	20.0851	33.4597
41.14	1.85415	2.84729	3.25553	5.17033	8.23461	12.7482	20.0926	33.4676
41.24	1.85418	2.84735	3.25564	5.17199	8.23767	12.7534	20.1001	33.4755
41.34	1.85421	2.84741	3.25575	5.17364	8.24072	12.7586	20.1076	33.4833
41.44	1.85424	2.84746	3.25586	5.1753	8.24377	12.7638	20.1151	33.4912
41.54	1.85427	2.84752	3.25597	5.17695	8.24682	12.769	20.1226	33.499
41.64	1.85429	2.84757	3.25609	5.17861	8.24987	12.7742	20.1301	33.5067
41.74	1.85432	2.84763	3.2562	5.18026	8.25292	12.7793	20.1376	33.5145
41.84	1.85435	2.84769	3.25631	5.18191	8.25596	12.7845	20.145	33.5222
41.94	1.85438	2.84774	3.25642	5.18357	8.25901	12.7897	20.1524	33.5299
42.04	1.85441	2.8478	3.25653	5.18522	8.26205	12.7948	20.1599	33.5376
42.14	1.85443	2.84785	3.25664	5.18687	8.26509	12.8	20.1673	33.5452
42.24	1.85446	2.84791	3.25675	5.18852	8.26812	12.8051	20.1747	33.5529
42.34	1.85449	2.84796	3.25687	5.19017	8.27116	12.8103	20.182	33.5605
42.44	1.85452	2.84802	3.25698	5.19181	8.27419	12.8154	20.1894	33.568
42.54	1.85455	2.84808	3.25709	5.19346	8.27722	12.8205	20.1967	33.5756
42.64	1.85457	2.84813	3.2572	5.19511	8.28025	12.8257	20.2041	33.5831
42.74	1.8546	2.84819	3.25731	5.19675	8.28328	12.8308	20.2114	33.5906
42.84	1.85463	2.84824	3.25742	5.1984	8.2863	12.8359	20.2187	33.598
42.94	1.85466	2.8483	3.25753	5.20004	8.28933	12.841	20.226	33.6055
43.04	1.85469	2.84836	3.25764	5.20169	8.29235	12.8461	20.2333	33.6129
43.14	1.85471	2.84841	3.25776	5.20333	8.29537	12.8512	20.2406	33.6203
43.24	1.85474	2.84847	3.25787	5.20497	8.29839	12.8563	20.2478	33.6276
43.34	1.85477	2.84852	3.25798	5.20661	8.3014	12.8614	20.2551	33.635
43.44	1.8548	2.84858	3.25809	5.20825	8.30442	12.8665	20.2623	33.6423
43.54	1.85483	2.84863	3.2582	5.20989	8.30743	12.8716	20.2695	33.6496
43.64	1.85485	2.84869	3.25831	5.21153	8.31044	12.8766	20.2767	33.6569
43.74	1.85488	2.84874	3.25842	5.21317	8.31344	12.8817	20.2839	33.6641
43.84	1.85491	2.8488	3.25853	5.21481	8.31645	12.8868	20.2911	33.6713
43.94	1.85494	2.84886	3.25864	5.21645	8.31945	12.8918	20.2983	33.6785
44.04	1.85496	2.84891	3.25875	5.21808	8.32246	12.8969	20.3054	33.6857
44.14	1.85499	2.84897	3.25887	5.21972	8.32545	12.9019	20.3125	33.6928
44.24	1.85502	2.84902	3.25898	5.22135	8.32845	12.907	20.3197	33.6999
44.34	1.85505	2.84908	3.25909	5.22299	8.33145	12.912	20.3268	33.707
44.44	1.85508	2.84913	3.2592	5.22462	8.33444	12.917	20.3339	33.7141
44.54	1.8551	2.84919	3.25931	5.22625	8.33744	12.922	20.341	33.7212
44.64	1.85513	2.84924	3.25942	5.22789	8.34043	12.9271	20.348	33.7282
44.74	1.85516	2.8493	3.25953	5.22952	8.34341	12.9321	20.3551	33.7352
44.84	1.85519	2.84936	3.25964	5.23115	8.3464	12.9371	20.3621	33.7422
44.94	1.85521	2.84941	3.25975	5.23278	8.34938	12.9421	20.3692	33.7491
45.04	1.85524	2.84947	3.25986	5.23441	8.35237	12.9471	20.3762	33.756
45.14	1.85527	2.84952	3.25997	5.23603	8.35535	12.9521	20.3832	33.7629
45.24	1.8553	2.84958	3.26008	5.23766	8.35833	12.9571	20.3902	33.7698
45.34	1.85533	2.84963	3.26019	5.23929	8.3613	12.9621	20.3972	33.7767
45.44	1.85535	2.84969	3.2603	5.24091	8.36428	12.967	20.4042	33.7835
45.54	1.85538	2.84974	3.26041	5.24254	8.36725	12.972	20.4111	33.7903
45.64	1.85541	2.8498	3.26052	5.24416	8.37022	12.977	20.4181	33.7971
45.74	1.85544	2.84985	3.26064	5.24579	8.37319	12.9819	20.425	33.8039
45.84	1.85546	2.84991	3.26075	5.24741	8.37616	12.9869	20.4319	33.8106
45.94	1.85549	2.84997	3.26086	5.24903	8.37912	12.9918	20.4388	33.8173
46.04	1.85552	2.85002	3.26097	5.25065	8.38209	12.9968	20.4457	33.824
46.14	1.85555	2.85008	3.26108	5.25228	8.38505	13.0017	20.4526	33.8307
46.24	1.85557	2.85013	3.26119	5.2539	8.38801	13.0067	20.4595	33.8374
46.34	1.8556	2.85019	3.2613	5.25551	8.39096	13.0116	20.4663	33.844
46.44	1.85563	2.85024	3.26141	5.25713	8.39392	13.0165	20.4732	33.8506
46.54	1.85566	2.8503	3.26152	5.25875	8.39687	13.0215	20.48	33.8572
46.64	1.85569	2.85035	3.26163	5.26037	8.39982	13.0264	20.4868	33.8637
46.74	1.85571	2.85041	3.26174	5.26199	8.40277	13.0313	20.4936	33.8703
46.84	1.85574	2.85046	3.26185	5.2636	8.40572	13.0362	20.5004	33.8768
46.94	1.85577	2.85052	3.26196	5.26522	8.40867	13.0411	20.5072	33.8833
47.04	1.8558	2.85057	3.26207	5.26683	8.41161	13.046	20.514	33.8898
47.14	1.85582	2.85063	3.26218	5.26844	8.41455	13.0509	20.5207	33.8962
47.24	1.85585	2.85068	3.26229	5.27006	8.41749	13.0558	20.5275	33.9026
47.34	1.85588	2.85074	3.2624	5.27167	8.42043	13.0606	20.5342	33.9091
47.44	1.85591	2.85079	3.26251	5.27328	8.42337	13.0655	20.5409	33.9154
47.54	1.85593	2.85085	3.26262	5.27489	8.4263	13.0704	20.5477	33.9218
47.64	1.85596	2.8509	3.26273	5.2765	8.42924	13.0753	20.5544	33.9281
47.74	1.85599	2.85096	3.26284	5.27811	8.43217	13.0801	20.561	33.9345
47.84	1.85602	2.85101	3.26295	5.27972	8.4351	13.085	20.5677	33.9408
47.94	1.85604	2.85107	3.26306	5.28133	8.43802	13.0898	20.5744	33.947
48.04	1.85607	2.85112	3.26317	5.28293	8.44095	13.0947	20.581	33.9533
48.14	1.8561	2.85118	3.26328	5.28454	8.44387	13.0995	20.5877	33.9595
48.24	1.85613	2.85123	3.26339	5.28615	8.44679	13.1043	20.5943	33.9658
48.34	1.85615	2.85129	3.26349	5.28775	8.44971	13.1092	20.6009	33.9719
48.44	1.85618	2.85134	3.2636	5.28935	8.45263	13.114	20.6075	33.9781
48.54	1.85621	2.8514	3.26371	5.29096	8.45555	13.1188	20.6141	33.9843
48.64	1.85624	2.85145	3.26382	5.29256	8.45846	13.1236	20.6207	33.9904
48.74	1.85626	2.85151	3.26393	5.29416	8.46137	13.1284	20.6272	33.9965
48.84	1.85629	2.85156	3.26404	5.29576	8.46428	13.1333	20.6338	34.0026
48.94	1.85632	2.85162	3.26415	5.29736	8.46719	13.1381	20.6403	34.0087
49.04	1.85635	2.85167	3.26426	5.29896	8.4701	13.1428	20.6468	34.0147
49.14	1.85637	2.85173	3.26437	5.30056	8.473	13.1476	20.6534	34.0207
49.24	1.8564	2.85178	3.26448	5.30216	8.4759	13.1524	20.6599	34.0268
49.34	1.85643	2.85184	3.26459	5.30376	8.4788	13.1572	20.6663	34.0327
49.44	1.85646	2.85189	3.2647	5.30536	8.4817	13.162	20.6728	34.0387
49.54	1.85648	2.85195	3.26481	5.30695	8.4846	13.1667	20.6793	34.0447
49.64	1.85651	2.852	3.26492	5.30855	8.48749	13.1715	20.6858	34.0506
49.74	1.85654	2.85206	3.26503	5.31014	8.49039	13.1763	20.6922	34.0565
49.84	1.85657	2.85211	3.26514	5.31174	8.49328	13.181	20.6986	34.0624
49.94	1.85659	2.85217	3.26524	5.31333	8.49617	13.1858	20.7051	34.0682
50.04	1.85662	2.85222	3.26535	5.31492	8.49906	13.1905	20.7115	34.0741
50.14	1.85665	2.85228	3.26546	5.31652	8.50194	13.1953	20.7179	34.0799
50.24	1.85668	2.85233	3.26557	5.31811	8.50483	13.2	20.7242	34.0857
50.34	1.8567	2.85238	3.26568	5.3197	8.50771	13.2047	20.7306	34.0915
50.44	1.85673	2.85244	3.26579	5.32129	8.51059	13.2095	20.737	34.0973
50.54	1.85676	2.85249	3.2659	5.32288	8.51347	13.2142	20.7433	34.103
50.64	1.85679	2.85255	3.26601	5.32446	8.51634	13.2189	20.7497	34.1087
50.74	1.85681	2.8526	3.26612	5.32605	8.51922	13.2236	20.756	34.1144
50.84	1.85684	2.85266	3.26623	5.32764	8.52209	13.2283	20.7623	34.1201
50.94	1.85687	2.85271	3.26633	5.32923	8.52496	13.233	20.7686	34.1258
51.04	1.8569	2.85277	3.26644	5.33081	8.52783	13.2377	20.7749	34.1315
51.14	1.85692	2.85282	3.26655	5.3324	8.5307	13.2424	20.7812	34.1371
51.24	1.85695	2.85288	3.26666	5.33398	8.53356	13.2471	20.7875	34.1427
51.34	1.85698	2.85293	3.26677	5.33556	8.53642	13.2518	20.7937	34.1483
51.44	1.857	2.85299	3.26688	5.33715	8.53929	13.2565	20.8	34.1539
51.54	1.85703	2.85304	3.26699	5.33873	8.54215	13.2611	20.8062	34.1594
51.64	1.85706	2.85309	3.2671	5.34031	8.545	13.2658	20.8124	34.165
51.74	1.85709	2.85315	3.2672	5.34189	8.54786	13.2705	20.8186	34.1705
51.84	1.85711	2.8532	3.26731	5.34347	8.55071	13.2751	20.8249	34.176
51.94	1.85714	2.85326	3.26742	5.34505	8.55357	13.2798	20.831	34.1815
52.04	1.85717	2.85331	3.26753	5.34663	8.55642	13.2844	20.8372	34.1869
52.14	1.8572	2.85337	3.26764	5.3482	8.55926	13.2891	20.8434	34.1924
52.24	1.85722	2.85342	3.26775	5.34978	8.56211	13.2937	20.8495	34.1978
52.34	1.85725	2.85348	3.26786	5.35136	8.56496	13.2983	20.8557	34.2032
52.44	1.85728	2.85353	3.26796	5.35293	8.5678	13.303	20.8618	34.2086
52.54	1.8573	2.85358	3.26807	5.35451	8.57064	13.3076	20.868	34.2139
52.64	1.85733	2.85364	3.26818	5.35608	8.57348	13.3122	20.8741	34.2193
52.74	1.85736	2.85369	3.26829	5.35766	8.57632	13.3168	20.8802	34.2246
52.84	1.85739	2.85375	3.2684	5.35923	8.57915	13.3214	20.8863	34.23
52.94	1.85741	2.8538	3.26851	5.3608	8.58199	13.326	20.8923	34.2352
53.04	1.85744	2.85386	3.26861	5.36237	8.58482	13.3306	20.8984	34.2405
53.14	1.85747	2.85391	3.26872	5.36394	8.58765	13.3352	20.9045	34.2458
53.24	1.85749	2.85396	3.26883	5.36551	8.59048	13.3398	20.9105	34.251
53.34	1.85752	2.85402	3.26894	5.36708	8.5933	13.3444	20.9165	34.2563
53.44	1.85755	2.85407	3.26905	5.36865	8.59613	13.349	20.9226	34.2615
53.54	1.85758	2.85413	3.26916	5.37022	8.59895	13.3536	20.9286	34.2667
53.64	1.8576	2.85418	3.26926	5.37178	8.60177	13.3581	20.9346	34.2718
53.74	1.85763	2.85424	3.26937	5.37335	8.60459	13.3627	20.9406	34.277
53.84	1.85766	2.85429	3.26948	5.37492	8.60741	13.3673	20.9465	34.2821
53.94	1.85768	2.85434	3.26959	5.37648	8.61022	13.3718	20.9525	34.2872
54.04	1.85771	2.8544	3.2697	5.37805	8.61304	13.3764	20.9585	34.2923
54.14	1.85774	2.85445	3.2698	5.37961	8.61585	13.3809	20.9644	34.2974
54.24	1.85777	2.85451	3.26991	5.38117	8.61866	13.3855	20.9704	34.3025
54.34	1.85779	2.85456	3.27002	5.38273	8.62147	13.39	20.9763	34.3075
54.44	1.85782	2.85462	3.27013	5.3843	8.62428	13.3945	20.9822	34.3126
54.54	1.85785	2.85467	3.27023	5.38586	8.62708	13.3991	20.9881	34.3176
54.64	1.85787	2.85472	3.27034	5.38742	8.62988	13.4036	20.994	34.3226
54.74	1.8579	2.85478	3.27045	5.38898	8.63268	13.4081	20.9999	34.3276
54.84	1.85793	2.85483	3.27056	5.39053	8.63548	13.4126	21.0058	34.3325
54.94	1.85796	2.85489	3.27067	5.39209	8.63828	13.4171	21.0116	34.3375
55.04	1.85798	2.85494	3.27077	5.39365	8.64108	13.4216	21.0175	34.3424
55.14	1.85801	2.85499	3.27088	5.39521	8.64387	13.4261	21.0233	34.3473
55.24	1.85804	2.85505	3.27099	5.39676	8.64666	13.4306	21.0291	34.3522
55.34	1.85806	2.8551	3.2711	5.39832	8.64945	13.4351	21.0349	34.3571
55.44	1.85809	2.85516	3.2712	5.39987	8.65224	13.4396	21.0408	34.362
55.54	1.85812	2.85521	3.27131	5.40142	8.65503	13.4441	21.0466	34.3668
55.64	1.85815	2.85526	3.27142	5.40298	8.65781	13.4486	21.0523	34.3717
55.74	1.85817	2.85532	3.27153	5.40453	8.6606	13.453	21.0581	34.3765
55.84	1.8582	2.85537	3.27163	5.40608	8.66338	13.4575	21.0639	34.3813
55.94	1.85823	2.85542	3.27174	5.40763	8.66616	13.462	21.0696	34.3861
56.04	1.85825	2.85548	3.27185	5.40918	8.66893	13.4664	21.0754	34.3908
56.14	1.85828	2.85553	3.27196	5.41073	8.67171	13.4709	21.0811	34.3956
56.24	1.85831	2.85559	3.27206	5.41228	8.67448	13.4753	21.0868	34.4003
56.34	1.85833	2.85564	3.27217	5.41383	8.67726	13.4798	21.0926	34.405
56.44	1.85836	2.85569	3.27228	5.41538	8.68003	13.4842	21.0983	34.4098
56.54	1.85839	2.85575	3.27239	5.41692	8.68279	13.4887	21.1039	34.4144
56.64	1.85841	2.8558	3.27249	5.41847	8.68556	13.4931	21.1096	34.4191
56.74	1.85844	2.85586	3.2726	5.42001	8.68833	13.4975	21.1153	34.4238
56.84	1.85847	2.85591	3.27271	5.42156	8.69109	13.5019	21.121	34.4284
56.94	1.8585	2.85596	3.27281	5.4231	8.69385	13.5063	21.1266	34.433
57.04	1.85852	2.85602	3.27292	5.42465	8.69661	13.5108	21.1323	34.4376
57.14	1.85855	2.85607	3.27303	5.42619	8.69937	13.5152	21.1379	34.4422
57.24	1.85858	2.85612	3.27314	5.42773	8.70212	13.5196	21.1435	34.4468
57.34	1.8586	2.85618	3.27324	5.42927	8.70488	13.524	21.1491	34.4514
57.44	1.85863	2.85623	3.27335	5.43081	8.70763	13.5284	21.1547	34.4559
57.54	1.85866	2.85629	3.27346	5.43235	8.71038	13.5328	21.1603	34.4604
57.64	1.85868	2.85634	3.27356	5.43389	8.71313	13.5371	21.1659	34.465
57.74	1.85871	2.85639	3.27367	5.43543	8.71588	13.5415	21.1714	34.4695
57.84	1.85874	2.85645	3.27378	5.43697	8.71862	13.5459	21.177	34.4739
57.94	1.85876	2.8565	3.27388	5.4385	8.72137	13.5503	21.1826	34.4784
58.04	1.85879	2.85655	3.27399	5.44004	8.72411	13.5546	21.1881	34.4829
58.14	1.85882	2.85661	3.2741	5.44158	8.72685	13.559	21.1936	34.4873
58.24	1.85885	2.85666	3.2742	5.44311	8.72959	13.5634	21.1991	34.4917
58.34	1.85887	2.85671	3.27431	5.44465	8.73232	13.5677	21.2046	34.4961
58.44	1.8589	2.85677	3.27442	5.44618	8.73506	13.5721	21.2101	34.5005
58.54	1.85893	2.85682	3.27452	5.44771	8.73779	13.5764	21.2156	34.5049
58.64	1.85895	2.85687	3.27463	5.44924	8.74052	13.5807	21.2211	34.5093
58.74	1.85898	2.85693	3.27474	5.45077	8.74325	13.5851	21.2266	34.5136
58.84	1.85901	2.85698	3.27484	5.45231	8.74598	13.5894	21.232	34.518
58.94	1.85903	2.85704	3.27495	5.45384	8.74871	13.5937	21.2375	34.5223
59.04	1.85906	2.85709	3.27506	5.45537	8.75143	13.5981	21.2429	34.5266
59.14	1.85909	2.85714	3.27516	5.45689	8.75415	13.6024	21.2484	34.5309
59.24	1.85911	2.8572	3.27527	5.45842	8.75687	13.6067	21.2538	34.5352
59.34	1.85914	2.85725	3.27538	5.45995	8.75959	13.611	21.2592	34.5394
59.44	1.85917	2.8573	3.27548	5.46148	8.76231	13.6153	21.2646	34.5437
59.54	1.85919	2.85736	3.27559	5.463	8.76503	13.6196	21.27	34.5479
59.64	1.85922	2.85741	3.2757	5.46453	8.76774	13.6239	21.2753	34.5521
59.74	1.85925	2.85746	3.2758	5.46605	8.77045	13.6282	21.2807	34.5563
59.84	1.85927	2.85752	3.27591	5.46758	8.77316	13.6325	21.2861	34.5605
59.94	1.8593	2.85757	3.27602	5.4691	8.77587	13.6367	21.2914	34.5647
60.04	1.85933	2.85762	3.27612	5.47062	8.77858	13.641	21.2968	34.5689
60.14	1.85935	2.85768	3.27623	5.47214	8.78128	13.6453	21.3021	34.573
60.24	1.85938	2.85773	3.27633	5.47366	8.78399	13.6496	21.3074	34.5771
60.34	1.85941	2.85778	3.27644	5.47518	8.78669	13.6538	21.3127	34.5813
60.44	1.85943	2.85784	3.27655	5.4767	8.78939	13.6581	21.318	34.5854
60.54	1.85946	2.85789	3.27665	5.47822	8.79208	13.6623	21.3233	34.5895
60.64	1.85949	2.85794	3.27676	5.47974	8.79478	13.6666	21.3286	34.5935
60.74	1.85951	2.858	3.27686	5.48126	8.79747	13.6708	21.3339	34.5976
60.84	1.85954	2.85805	3.27697	5.48278	8.80017	13.6751	21.3391	34.6016
60.94	1.85957	2.8581	3.27708	5.48429	8.80286	13.6793	21.3444	34.6057
61.04	1.85959	2.85816	3.27718	5.48581	8.80555	13.6836	21.3496	34.6097
61.14	1.85962	2.85821	3.27729	5.48732	8.80823	13.6878	21.3549	34.6137
61.24	1.85965	2.85826	3.27739	5.48884	8.81092	13.692	21.3601	34.6177
61.34	1.85967	2.85831	3.2775	5.49035	8.8136	13.6962	21.3653	34.6217
61.44	1.8597	2.85837	3.27761	5.49186	8.81629	13.7004	21.3705	34.6257
61.54	1.85973	2.85842	3.27771	5.49338	8.81897	13.7046	21.3757	34.6296
61.64	1.85975	2.85847	3.27782	5.49489	8.82165	13.7089	21.3809	34.6336
61.74	1.85978	2.85853	3.27792	5.4964	8.82432	13.7131	21.3861	34.6375
61.84	1.85981	2.85858	3.27803	5.49791	8.827	13.7173	21.3912	34.6414
61.94	1.85983	2.85863	3.27814	5.49942	8.82967	13.7214	21.3964	34.6453
62.04	1.85986	2.85869	3.27824	5.50093	8.83234	13.7256	21.4015	34.6492
62.14	1.85989	2.85874	3.27835	5.50244	8.83501	13.7298	21.4067	34.6531
62.24	1.85991	2.85879	3.27845	5.50394	8.83768	13.734	21.4118	34.6569
62.34	1.85994	2.85885	3.27856	5.50545	8.84035	13.7382	21.4169	34.6608
62.44	1.85997	2.8589	3.27866	5.50696	8.84301	13.7423	21.422	34.6646
62.54	1.85999	2.85895	3.27877	5.50846	8.84568	13.7465	21.4271	34.6684
62.64	1.86002	2.859	3.27887	5.50997	8.84834	13.7507	21.4322	34.6722
62.74	1.86005	2.85906	3.27898	5.51147	8.851	13.7548	21.4373	34.676
62.84	1.86007	2.85911	3.27909	5.51297	8.85366	13.759	21.4424	34.6798
62.94	1.8601	2.85916	3.27919	5.51448	8.85631	13.7631	21.4475	34.6836
63.04	1.86013	2.85922	3.2793	5.51598	8.85897	13.7673	21.4525	34.6873
63.14	1.86015	2.85927	3.2794	5.51748	8.86162	13.7714	21.4576	34.6911
63.24	1.86018	2.85932	3.27951	5.51898	8.86427	13.7756	21.4626	34.6948
63.34	1.8602	2.85937	3.27961	5.52048	8.86692	13.7797	21.4676	34.6985
63.44	1.86023	2.85943	3.27972	5.52198	8.86957	13.7838	21.4726	34.7023
63.54	1.86026	2.85948	3.27982	5.52348	8.87221	13.788	21.4776	34.706
63.64	1.86028	2.85953	3.27993	5.52498	8.87486	13.7921	21.4826	34.7096
63.74	1.86031	2.85959	3.28003	5.52648	8.8775	13.7962	21.4876	34.7133
63.84	1.86034	2.85964	3.28014	5.52797	8.88014	13.8003	21.4926	34.717
63.94	1.86036	2.85969	3.28024	5.52947	8.88278	13.8044	21.4976	34.7206
64.04	1.86039	2.85974	3.28035	5.53096	8.88542	13.8085	21.5026	34.7242
64.14	1.86042	2.8598	3.28045	5.53246	8.88806	13.8126	21.5075	34.7279
64.24	1.86044	2.85985	3.28056	5.53395	8.89069	13.8167	21.5125	34.7315
64.34	1.86047	2.8599	3.28066	5.53545	8.89332	13.8208	21.5174	34.7351
64.44	1.8605	2.85996	3.28077	5.53694	8.89595	13.8249	21.5223	34.7386
64.54	1.86052	2.86001	3.28087	5.53843	8.89858	13.829	21.5272	34.7422
64.64	1.86055	2.86006	3.28098	5.53992	8.90121	13.833	21.5322	34.7458
64.74	1.86057	2.86011	3.28108	5.54141	8.90383	13.8371	21.5371	34.7493
64.84	1.8606	2.86017	3.28119	5.5429	8.90646	13.8412	21.5419	34.7529
64.94	1.86063	2.86022	3.28129	5.54439	8.90908	13.8452	21.5468	34.7564
65.04	1.86065	2.86027	3.2814	5.54588	8.9117	13.8493	21.5517	34.7599
65.14	1.86068	2.86032	3.2815	5.54737	8.91432	13.8534	21.5566	34.7634
65.24	1.86071	2.86038	3.28161	5.54885	8.91694	13.8574	21.5614	34.7669
65.34	1.86073	2.86043	3.28171	5.55034	8.91955	13.8615	21.5663	34.7704
65.44	1.86076	2.86048	3.28182	5.55183	8.92217	13.8655	21.5711	34.7738
65.54	1.86079	2.86053	3.28192	5.55331	8.92478	13.8695	21.5759	34.7773
65.64	1.86081	2.86059	3.28203	5.5548	8.92739	13.8736	21.5808	34.7807
65.74	1.86084	2.86064	3.28213	5.55628	8.93	13.8776	21.5856	34.7841
65.84	1.86086	2.86069	3.28224	5.55776	8.9326	13.8816	21.5904	34.7876
65.94	1.86089	2.86074	3.28234	5.55925	8.93521	13.8857	21.5952	34.791
66.04	1.86092	2.8608	3.28245	5.56073	8.93781	13.8897	21.6	34.7944
66.14	1.86094	2.86085	3.28255	5.56221	8.94042	13.8937	21.6047	34.7977
66.24	1.86097	2.8609	3.28265	5.56369	8.94302	13.8977	21.6095	34.8011
66.34	1.861	2.86095	3.28276	5.56517	8.94561	13.9017	21.6143	34.8045
66.44	1.86102	2.86101	3.28286	5.56665	8.94821	13.9057	21.619	34.8078
66.54	1.86105	2.86106	3.28297	5.56813	8.95081	13.9097	21.6238	34.8112
66.64	1.86107	2.86111	3.28307	5.56961	8.9534	13.9137	21.6285	34.8145
66.74	1.8611	2.86116	3.28318	5.57108	8.95599	13.9177	21.6332	34.8178
66.84	1.86113	2.86122	3.28328	5.57256	8.95858	13.9217	21.6379	34.8211
66.94	1.86115	2.86127	3.28339	5.57404	8.96117	13.9257	21.6426	34.8244
67.04	1.86118	2.86132	3.28349	5.57551	8.96376	13.9296	21.6473	34.8277
67.14	1.86121	2.86137	3.28359	5.57699	8.96634	13.9336	21.652	34.8309
67.24	1.86123	2.86143	3.2837	5.57846	8.96893	13.9376	21.6567	34.8342
67.34	1.86126	2.86148	3.2838	5.57993	8.97151	13.9415	21.6614	34.8375
67.44	1.86128	2.86153	3.28391	5.58141	8.97409	13.9455	21.666	34.8407
67.54	1.86131	2.86158	3.28401	5.58288	8.97667	13.9494	21.6707	34.8439
67.64	1.86134	2.86164	3.28412	5.58435	8.97924	13.9534	21.6753	34.8471
67.74	1.86136	2.86169	3.28422	5.58582	8.98182	13.9573	21.68	34.8503
67.84	1.86139	2.86174	3.28432	5.58729	8.98439	13.9613	21.6846	34.8535
67.94	1.86142	2.86179	3.28443	5.58876	8.98696	13.9652	21.6892	34.8567
68.04	1.86144	2.86184	3.28453	5.59023	8.98953	13.9692	21.6939	34.8599
68.14	1.86147	2.8619	3.28464	5.5917	8.9921	13.9731	21.6985	34.863
68.24	1.86149	2.86195	3.28474	5.59316	8.99467	13.977	21.7031	34.8662
68.34	1.86152	2.862	3.28484	5.59463	8.99723	13.981	21.7076	34.8693
68.44	1.86155	2.86205	3.28495	5.5961	8.9998	13.9849	21.7122	34.8725
68.54	1.86157	2.86211	3.28505	5.59756	9.00236	13.9888	21.7168	34.8756
68.64	1.8616	2.86216	3.28516	5.59903	9.00492	13.9927	21.7214	34.8787
68.74	1.86162	2.86221	3.28526	5.60049	9.00748	13.9966	21.7259	34.8818
68.84	1.86165	2.86226	3.28536	5.60195	9.01003	14.0005	21.7305	34.8849
68.94	1.86168	2.86231	3.28547	5.60342	9.01259	14.0044	21.735	34.8879
69.04	1.8617	2.86237	3.28557	5.60488	9.01514	14.0083	21.7395	34.891
69.14	1.86173	2.86242	3.28567	5.60634	9.0177	14.0122	21.7441	34.8941
69.24	1.86176	2.86247	3.28578	5.6078	9.02025	14.0161	21.7486	34.8971
69.34	1.86178	2.86252	3.28588	5.60926	9.02279	14.02	21.7531	34.9001
69.44	1.86181	2.86257	3.28598	5.61072	9.02534	14.0238	21.7576	34.9032
69.54	1.86183	2.86263	3.28609	5.61218	9.02789	14.0277	21.7621	34.9062
69.64	1.86186	2.86268	3.28619	5.61364	9.03043	14.0316	21.7665	34.9092
69.74	1.86189	2.86273	3.2863	5.61509	9.03297	14.0355	21.771	34.9122
69.84	1.86191	2.86278	3.2864	5.61655	9.03551	14.0393	21.7755	34.9152
69.94	1.86194	2.86283	3.2865	5.61801	9.03805	14.0432	21.7799	34.9181
70.04	1.86196	2.86289	3.28661	5.61946	9.04059	14.047	21.7844	34.9211
70.14	1.86199	2.86294	3.28671	5.62092	9.04312	14.0509	21.7888	34.924
70.24	1.86202	2.86299	3.28681	5.62237	9.04566	14.0547	21.7933	34.927
70.34	1.86204	2.86304	3.28692	5.62382	9.04819	14.0586	21.7977	34.9299
70.44	1.86207	2.86309	3.28702	5.62528	9.05072	14.0624	21.8021	34.9328
70.54	1.86209	2.86315	3.28712	5.62673	9.05325	14.0662	21.8065	34.9358
70.64	1.86212	2.8632	3.28723	5.62818	9.05578	14.0701	21.8109	34.9387
70.74	1.86215	2.86325	3.28733	5.62963	9.0583	14.0739	21.8153	34.9416
70.84	1.86217	2.8633	3.28743	5.63108	9.06083	14.0777	21.8197	34.9444
70.94	1.8622	2.86335	3.28754	5.63253	9.06335	14.0815	21.8241	34.9473
71.04	1.86222	2.8634	3.28764	5.63398	9.06587	14.0854	21.8284	34.9502
71.14	1.86225	2.86346	3.28774	5.63543	9.06839	14.0892	21.8328	34.953
71.24	1.86228	2.86351	3.28785	5.63688	9.07091	14.093	21.8371	34.9559
71.34	1.8623	2.86356	3.28795	5.63832	9.07342	14.0968	21.8415	34.9587
71.44	1.86233	2.86361	3.28805	5.63977	9.07594	14.1006	21.8458	34.9615
71.54	1.86235	2.86366	3.28815	5.64122	9.07845	14.1044	21.8502	34.9643
71.64	1.86238	2.86372	3.28826	5.64266	9.08096	14.1082	21.8545	34.9672
71.74	1.86241	2.86377	3.28836	5.6441	9.08347	14.1119	21.8588	34.9699
71.84	1.86243	2.86382	3.28846	5.64555	9.08598	14.1157	21.8631	34.9727
71.94	1.86246	2.86387	3.28857	5.64699	9.08848	14.1195	21.8674	34.9755
72.04	1.86248	2.86392	3.28867	5.64843	9.09099	14.1233	21.8717	34.9783
72.14	1.86251	2.86397	3.28877	5.64988	9.09349	14.1271	21.876	34.981
72.24	1.86253	2.86403	3.28888	5.65132	9.09599	14.1308	21.8802	34.9838
72.34	1.86256	2.86408	3.28898	5.65276	9.09849	14.1346	21.8845	34.9865
72.44	1.86259	2.86413	3.28908	5.6542	9.10099	14.1383	21.8888	34.9893
72.54	1.86261	2.86418	3.28918	5.65564	9.10349	14.1421	21.893	34.992
72.64	1.86264	2.86423	3.28929	5.65707	9.10598	14.1459	21.8973	34.9947
72.74	1.86266	2.86428	3.28939	5.65851	9.10847	14.1496	21.9015	34.9974
72.84	1.86269	2.86434	3.28949	5.65995	9.11096	14.1533	21.9057	35.0001
72.94	1.86272	2.86439	3.28959	5.66139	9.11345	14.1571	21.9099	35.0028
73.04	1.86274	2.86444	3.2897	5.66282	9.11594	14.1608	21.9141	35.0055
73.14	1.86277	2.86449	3.2898	5.66426	9.11843	14.1646	21.9183	35.0081
73.24	1.86279	2.86454	3.2899	5.66569	9.12092	14.1683	21.9225	35.0108
73.34	1.86282	2.86459	3.29001	5.66713	9.1234	14.172	21.9267	35.0134
73.44	1.86285	2.86464	3.29011	5.66856	9.12588	14.1757	21.9309	35.0161
73.54	1.86287	2.8647	3.29021	5.66999	9.12836	14.1794	21.9351	35.0187
73.64	1.8629	2.86475	3.29031	5.67142	9.13084	14.1832	21.9393	35.0213
73.74	1.86292	2.8648	3.29042	5.67286	9.13332	14.1869	21.9434	35.0239
73.84	1.86295	2.86485	3.29052	5.67429	9.13579	14.1906	21.9476	35.0265
73.94	1.86297	2.8649	3.29062	5.67572	9.13827	14.1943	21.9517	35.0291
74.04	1.863	2.86495	3.29072	5.67715	9.14074	14.198	21.9558	35.0317
74.14	1.86303	2.865	3.29082	5.67858	9.14321	14.2017	21.96	35.0343
74.24	1.86305	2.86506	3.29093	5.68	9.14568	14.2054	21.9641	35.0369
74.34	1.86308	2.86511	3.29103	5.68143	9.14815	14.209	21.9682	35.0394
74.44	1.8631	2.86516	3.29113	5.68286	9.15061	14.2127	21.9723	35.042
74.54	1.86313	2.86521	3.29123	5.68428	9.15308	14.2164	21.9764	35.0445
74.64	1.86315	2.86526	3.29134	5.68571	9.15554	14.2201	21.9805	35.047
74.74	1.86318	2.86531	3.29144	5.68713	9.158	14.2237	21.9846	35.0496
74.84	1.86321	2.86536	3.29154	5.68856	9.16046	14.2274	21.9887	35.0521
74.94	1.86323	2.86542	3.29164	5.68998	9.16292	14.2311	21.9927	35.0546
75.04	1.86326	2.86547	3.29174	5.69141	9.16537	14.2347	21.9968	35.0571
75.14	1.86328	2.86552	3.29185	5.69283	9.16783	14.2384	22.0008	35.0596
75.24	1.86331	2.86557	3.29195	5.69425	9.17028	14.242	22.0049	35.0621
75.34	1.86333	2.86562	3.29205	5.69567	9.17273	14.2457	22.0089	35.0645
75.44	1.86336	2.86567	3.29215	5.69709	9.17518	14.2493	22.0129	35.067
75.54	1.86339	2.86572	3.29225	5.69851	9.17763	14.253	22.017	35.0695
75.64	1.86341	2.86577	3.29236	5.69993	9.18008	14.2566	22.021	35.0719
75.74	1.86344	2.86583	3.29246	5.70135	9.18252	14.2602	22.025	35.0744
75.84	1.86346	2.86588	3.29256	5.70277	9.18497	14.2639	22.029	35.0768
75.94	1.86349	2.86593	3.29266	5.70418	9.18741	14.2675	22.033	35.0792
76.04	1.86351	2.86598	3.29276	5.7056	9.18985	14.2711	22.037	35.0816
76.14	1.86354	2.86603	3.29287	5.70702	9.19229	14.2747	22.041	35.084
76.24	1.86357	2.86608	3.29297	5.70843	9.19473	14.2784	22.0449	35.0864
76.34	1.86359	2.86613	3.29307	5.70985	9.19716	14.282	22.0489	35.0888
76.44	1.86362	2.86618	3.29317	5.71126	9.1996	14.2856	22.0529	35.0912
76.54	1.86364	2.86623	3.29327	5.71267	9.20203	14.2892	22.0568	35.0936
76.64	1.86367	2.86629	3.29337	5.71409	9.20446	14.2928	22.0607	35.096
76.74	1.86369	2.86634	3.29348	5.7155	9.20689	14.2964	22.0647	35.0983
76.84	1.86372	2.86639	3.29358	5.71691	9.20932	14.3	22.0686	35.1007
76.94	1.86374	2.86644	3.29368	5.71832	9.21174	14.3035	22.0725	35.103
77.04	1.86377	2.86649	3.29378	5.71973	9.21417	14.3071	22.0765	35.1054
77.14	1.8638	2.86654	3.29388	5.72114	9.21659	14.3107	22.0804	35.1077
77.24	1.86382	2.86659	3.29398	5.72255	9.21901	14.3143	22.0843	35.11
77.34	1.86385	2.86664	3.29409	5.72396	9.22143	14.3179	22.0882	35.1123
77.44	1.86387	2.86669	3.29419	5.72537	9.22385	14.3214	22.092	35.1146
77.54	1.8639	2.86674	3.29429	5.72677	9.22627	14.325	22.0959	35.1169
77.64	1.86392	2.8668	3.29439	5.72818	9.22868	14.3286	22.0998	35.1192
77.74	1.86395	2.86685	3.29449	5.72959	9.2311	14.3321	22.1037	35.1215
77.84	1.86397	2.8669	3.29459	5.73099	9.23351	14.3357	22.1075	35.1238
77.94	1.864	2.86695	3.29469	5.7324	9.23592	14.3392	22.1114	35.126
78.04	1.86403	2.867	3.2948	5.7338	9.23833	14.3428	22.1152	35.1283
78.14	1.86405	2.86705	3.2949	5.7352	9.24074	14.3463	22.119	35.1305
78.24	1.86408	2.8671	3.295	5.73661	9.24314	14.3498	22.1229	35.1328
78.34	1.8641	2.86715	3.2951	5.73801	9.24555	14.3534	22.1267	35.135
78.44	1.86413	2.8672	3.2952	5.73941	9.24795	14.3569	22.1305	35.1372
78.54	1.86415	2.86725	3.2953	5.74081	9.25035	14.3604	22.1343	35.1395
78.64	1.86418	2.8673	3.2954	5.74221	9.25275	14.364	22.1381	35.1417
78.74	1.8642	2.86736	3.2955	5.74361	9.25515	14.3675	22.1419	35.1439
78.84	1.86423	2.86741	3.2956	5.74501	9.25755	14.371	22.1457	35.1461
78.94	1.86425	2.86746	3.29571	5.74641	9.25994	14.3745	22.1495	35.1483
79.04	1.86428	2.86751	3.29581	5.74781	9.26234	14.378	22.1533	35.1504
79.14	1.86431	2.86756	3.29591	5.7492	9.26473	14.3815	22.157	35.1526
79.24	1.86433	2.86761	3.29601	5.7506	9.26712	14.385	22.1608	35.1548
79.34	1.86436	2.86766	3.29611	5.75199	9.26951	14.3885	22.1645	35.1569
79.44	1.86438	2.86771	3.29621	5.75339	9.27189	14.392	22.1683	35.1591
79.54	1.86441	2.86776	3.29631	5.75478	9.27428	14.3955	22.172	35.1612
79.64	1.86443	2.86781	3.29641	5.75618	9.27666	14.399	22.1758	35.1634
79.74	1.86446	2.86786	3.29651	5.75757	9.27905	14.4025	22.1795	35.1655
79.84	1.86448	2.86791	3.29661	5.75896	9.28143	14.406	22.1832	35.1676
79.94	1.86451	2.86796	3.29671	5.76036	9.28381	14.4095	22.1869	35.1697
80.04	1.86453	2.86801	3.29682	5.76175	9.28619	14.4129	22.1906	35.1719
80.14	1.86456	2.86806	3.29692	5.76314	9.28856	14.4164	22.1943	35.174
80.24	1.86458	2.86812	3.29702	5.76453	9.29094	14.4199	22.198	35.1761
80.34	1.86461	2.86817	3.29712	5.76592	9.29331	14.4233	22.2017	35.1781
80.44	1.86464	2.86822	3.29722	5.76731	9.29568	14.4268	22.2054	35.1802
80.54	1.86466	2.86827	3.29732	5.76869	9.29805	14.4302	22.2091	35.1823
80.64	1.86469	2.86832	3.29742	5.77008	9.30042	14.4337	22.2127	35.1844
80.74	1.86471	2.86837	3.29752	5.77147	9.30279	14.4371	22.2164	35.1864
80.84	1.86474	2.86842	3.29762	5.77286	9.30516	14.4406	22.22	35.1885
80.94	1.86476	2.86847	3.29772	5.77424	9.30752	14.444	22.2237	35.1905
81.04	1.86479	2.86852	3.29782	5.77563	9.30988	14.4475	22.2273	35.1926
81.14	1.86481	2.86857	3.29792	5.77701	9.31225	14.4509	22.231	35.1946
81.24	1.86484	2.86862	3.29802	5.77839	9.31461	14.4543	22.2346	35.1966
81.34	1.86486	2.86867	3.29812	5.77978	9.31696	14.4578	22.2382	35.1986
81.44	1.86489	2.86872	3.29822	5.78116	9.31932	14.4612	22.2418	35.2006
81.54	1.86491	2.86877	3.29832	5.78254	9.32168	14.4646	22.2454	35.2027
81.64	1.86494	2.86882	3.29842	5.78392	9.32403	14.468	22.249	35.2046
81.74	1.86496	2.86887	3.29852	5.7853	9.32638	14.4714	22.2526	35.2066
81.84	1.86499	2.86892	3.29862	5.78669	9.32873	14.4748	22.2562	35.2086
81.94	1.86501	2.86897	3.29872	5.78806	9.33108	14.4783	22.2598	35.2106
82.04	1.86504	2.86902	3.29882	5.78944	9.33343	14.4817	22.2634	35.2126
82.14	1.86507	2.86907	3.29893	5.79082	9.33577	14.4851	22.2669	35.2145
82.24	1.86509	2.86912	3.29903	5.7922	9.33812	14.4884	22.2705	35.2165
82.34	1.86512	2.86917	3.29913	5.79358	9.34046	14.4918	22.274	35.2184
82.44	1.86514	2.86923	3.29923	5.79495	9.3428	14.4952	22.2776	35.2204
82.54	1.86517	2.86928	3.29933	5.79633	9.34514	14.4986	22.2811	35.2223
82.64	1.86519	2.86933	3.29943	5.7977	9.34748	14.502	22.2847	35.2243
82.74	1.86522	2.86938	3.29953	5.79908	9.34982	14.5054	22.2882	35.2262
82.84	1.86524	2.86943	3.29963	5.80045	9.35215	14.5087	22.2917	35.2281
82.94	1.86527	2.86948	3.29973	5.80183	9.35449	14.5121	22.2952	35.23
83.04	1.86529	2.86953	3.29983	5.8032	9.35682	14.5155	22.2987	35.2319
83.14	1.86532	2.86958	3.29993	5.80457	9.35915	14.5188	22.3022	35.2338
83.24	1.86534	2.86963	3.30003	5.80594	9.36148	14.5222	22.3057	35.2357
83.34	1.86537	2.86968	3.30013	5.80731	9.36381	14.5256	22.3092	35.2376
83.44	1.86539	2.86973	3.30023	5.80868	9.36614	14.5289	22.3127	35.2395
83.54	1.86542	2.86978	3.30032	5.81005	9.36846	14.5323	22.3162	35.2413
83.64	1.86544	2.86983	3.30042	5.81142	9.37078	14.5356	22.3197	35.2432
83.74	1.86547	2.86988	3.30052	5.81279	9.37311	14.539	22.3231	35.2451
83.84	1.86549	2.86993	3.30062	5.81416	9.37543	14.5423	22.3266	35.2469
83.94	1.86552	2.86998	3.30072	5.81552	9.37775	14.5456	22.33	35.2488
84.04	1.86554	2.87003	3.30082	5.81689	9.38006	14.549	22.3335	35.2506
84.14	1.86557	2.87008	3.30092	5.81826	9.38238	14.5523	22.3369	35.2524
84.24	1.86559	2.87013	3.30102	5.81962	9.38469	14.5556	22.3403	35.2543
84.34	1.86562	2.87018	3.30112	5.82099	9.38701	14.5589	22.3438	35.2561
84.44	1.86564	2.87023	3.30122	5.82235	9.38932	14.5623	22.3472	35.2579
84.54	1.86567	2.87028	3.30132	5.82371	9.39163	14.5656	22.3506	35.2597
84.64	1.86569	2.87033	3.30142	5.82508	9.39394	14.5689	22.354	35.2615
84.74	1.86572	2.87038	3.30152	5.82644	9.39624	14.5722	22.3574	35.2633
84.84	1.86574	2.87043	3.30162	5.8278	9.39855	14.5755	22.3608	35.2651
84.94	1.86577	2.87048	3.30172	5.82916	9.40085	14.5788	22.3642	35.2669
85.04	1.86579	2.87053	3.30182	5.83052	9.40315	14.5821	22.3676	35.2687
85.14	1.86582	2.87058	3.30192	5.83188	9.40546	14.5854	22.371	35.2705
85.24	1.86584	2.87063	3.30202	5.83324	9.40776	14.5887	22.3743	35.2722
85.34	1.86587	2.87068	3.30212	5.8346	9.41005	14.592	22.3777	35.274
85.44	1.86589	2.87073	3.30222	5.83596	9.41235	14.5953	22.381	35.2757
85.54	1.86592	2.87078	3.30232	5.83732	9.41464	14.5985	22.3844	35.2775
85.64	1.86594	2.87083	3.30241	5.83867	9.41694	14.6018	22.3877	35.2792
85.74	1.86597	2.87088	3.30251	5.84003	9.41923	14.6051	22.3911	35.281
85.84	1.86599	2.87093	3.30261	5.84138	9.42152	14.6084	22.3944	35.2827
85.94	1.86602	2.87098	3.30271	5.84274	9.42381	14.6116	22.3977	35.2844
86.04	1.86604	2.87103	3.30281	5.84409	9.4261	14.6149	22.4011	35.2862
86.14	1.86607	2.87108	3.30291	5.84545	9.42838	14.6182	22.4044	35.2879
86.24	1.86609	2.87113	3.30301	5.8468	9.43067	14.6214	22.4077	35.2896
86.34	1.86612	2.87118	3.30311	5.84815	9.43295	14.6247	22.411	35.2913
86.44	1.86614	2.87123	3.30321	5.8495	9.43523	14.6279	22.4143	35.293
86.54	1.86617	2.87128	3.30331	5.85086	9.43751	14.6312	22.4176	35.2947
86.64	1.86619	2.87133	3.30341	5.85221	9.43979	14.6344	22.4209	35.2964
86.74	1.86622	2.87138	3.30351	5.85356	9.44207	14.6376	22.4242	35.298
86.84	1.86624	2.87143	3.3036	5.85491	9.44435	14.6409	22.4274	35.2997
86.94	1.86627	2.87148	3.3037	5.85625	9.44662	14.6441	22.4307	35.3014
87.04	1.86629	2.87153	3.3038	5.8576	9.44889	14.6473	22.434	35.303
87.14	1.86632	2.87158	3.3039	5.85895	9.45116	14.6506	22.4372	35.3047
87.24	1.86634	2.87162	3.304	5.8603	9.45343	14.6538	22.4405	35.3063
87.34	1.86637	2.87167	3.3041	5.86164	9.4557	14.657	22.4437	35.308
87.44	1.86639	2.87172	3.3042	5.86299	9.45797	14.6602	22.4469	35.3096
87.54	1.86642	2.87177	3.3043	5.86433	9.46024	14.6634	22.4502	35.3113
87.64	1.86644	2.87182	3.30439	5.86568	9.4625	14.6667	22.4534	35.3129
87.74	1.86647	2.87187	3.30449	5.86702	9.46476	14.6699	22.4566	35.3145
87.84	1.86649	2.87192	3.30459	5.86837	9.46702	14.6731	22.4598	35.3161
87.94	1.86652	2.87197	3.30469	5.86971	9.46928	14.6763	22.463	35.3178
88.04	1.86654	2.87202	3.30479	5.87105	9.47154	14.6795	22.4662	35.3194
88.14	1.86657	2.87207	3.30489	5.87239	9.4738	14.6827	22.4694	35.321
88.24	1.86659	2.87212	3.30499	5.87373	9.47605	14.6858	22.4726	35.3226
88.34	1.86662	2.87217	3.30509	5.87507	9.47831	14.689	22.4758	35.3241
88.44	1.86664	2.87222	3.30518	5.87641	9.48056	14.6922	22.479	35.3257
88.54	1.86667	2.87227	3.30528	5.87775	9.48281	14.6954	22.4822	35.3273
88.64	1.86669	2.87232	3.30538	5.87909	9.48506	14.6986	22.4853	35.3289
88.74	1.86672	2.87237	3.30548	5.88043	9.48731	14.7017	22.4885	35.3305
88.84	1.86674	2.87242	3.30558	5.88177	9.48955	14.7049	22.4917	35.332
88.94	1.86677	2.87247	3.30568	5.8831	9.4918	14.7081	22.4948	35.3336
89.04	1.86679	2.87252	3.30577	5.88444	9.49404	14.7112	22.498	35.3351
89.14	1.86682	2.87257	3.30587	5.88577	9.49629	14.7144	22.5011	35.3367
89.24	1.86684	2.87262	3.30597	5.88711	9.49853	14.7176	22.5042	35.3382
89.34	1.86687	2.87267	3.30607	5.88844	9.50077	14.7207	22.5073	35.3398
89.44	1.86689	2.87271	3.30617	5.88978	9.503	14.7239	22.5105	35.3413
89.54	1.86691	2.87276	3.30627	5.89111	9.50524	14.727	22.5136	35.3428
89.64	1.86694	2.87281	3.30636	5.89244	9.50747	14.7302	22.5167	35.3443
89.74	1.86696	2.87286	3.30646	5.89377	9.50971	14.7333	22.5198	35.3459
89.84	1.86699	2.87291	3.30656	5.89511	9.51194	14.7364	22.5229	35.3474
89.94	1.86701	2.87296	3.30666	5.89644	9.51417	14.7396	22.526	35.3489
90.04	1.86704	2.87301	3.30676	5.89777	9.5164	14.7427	22.5291	35.3504
90.14	1.86706	2.87306	3.30685	5.8991	9.51863	14.7458	22.5322	35.3519
90.24	1.86709	2.87311	3.30695	5.90042	9.52085	14.7489	22.5352	35.3534
90.34	1.86711	2.87316	3.30705	5.90175	9.52308	14.7521	22.5383	35.3549
90.44	1.86714	2.87321	3.30715	5.90308	9.5253	14.7552	22.5414	35.3563
90.54	1.86716	2.87326	3.30725	5.90441	9.52752	14.7583	22.5444	35.3578
90.64	1.86719	2.87331	3.30734	5.90573	9.52975	14.7614	22.5475	35.3593
90.74	1.86721	2.87336	3.30744	5.90706	9.53196	14.7645	22.5505	35.3608
90.84	1.86724	2.8734	3.30754	5.90839	9.53418	14.7676	22.5536	35.3622
90.94	1.86726	2.87345	3.30764	5.90971	9.5364	14.7707	22.5566	35.3637
91.04	1.86729	2.8735	3.30774	5.91103	9.53861	14.7738	22.5597	35.3651
91.14	1.86731	2.87355	3.30783	5.91236	9.54083	14.7769	22.5627	35.3666
91.24	1.86733	2.8736	3.30793	5.91368	9.54304	14.78	22.5657	35.368
91.34	1.86736	2.87365	3.30803	5.915	9.54525	14.7831	22.5687	35.3694
91.44	1.86738	2.8737	3.30813	5.91632	9.54746	14.7862	22.5717	35.3709
91.54	1.86741	2.87375	3.30822	5.91765	9.54967	14.7893	22.5747	35.3723
91.64	1.86743	2.8738	3.30832	5.91897	9.55187	14.7923	22.5777	35.3737
91.74	1.86746	2.87385	3.30842	5.92029	9.55408	14.7954	22.5807	35.3751
91.84	1.86748	2.8739	3.30852	5.92161	9.55628	14.7985	22.5837	35.3766
91.94	1.86751	2.87395	3.30862	5.92292	9.55848	14.8016	22.5867	35.378
92.04	1.86753	2.87399	3.30871	5.92424	9.56068	14.8046	22.5897	35.3794
92.14	1.86756	2.87404	3.30881	5.92556	9.56288	14.8077	22.5926	35.3808
92.24	1.86758	2.87409	3.30891	5.92688	9.56508	14.8108	22.5956	35.3822
92.34	1.86761	2.87414	3.30901	5.92819	9.56728	14.8138	22.5986	35.3835
92.44	1.86763	2.87419	3.3091	5.92951	9.56947	14.8169	22.6015	35.3849
92.54	1.86765	2.87424	3.3092	5.93082	9.57166	14.8199	22.6045	35.3863
92.64	1.86768	2.87429	3.3093	5.93214	9.57386	14.823	22.6074	35.3877
92.74	1.8677	2.87434	3.3094	5.93345	9.57605	14.826	22.6104	35.3891
92.84	1.86773	2.87439	3.30949	5.93477	9.57824	14.829	22.6133	35.3904
92.94	1.86775	2.87444	3.30959	5.93608	9.58042	14.8321	22.6162	35.3918
93.04	1.86778	2.87448	3.30969	5.93739	9.58261	14.8351	22.6191	35.3931
93.14	1.8678	2.87453	3.30978	5.9387	9.58479	14.8382	22.6221	35.3945
93.24	1.86783	2.87458	3.30988	5.94001	9.58698	14.8412	22.625	35.3958
93.34	1.86785	2.87463	3.30998	5.94133	9.58916	14.8442	22.6279	35.3972
93.44	1.86788	2.87468	3.31008	5.94263	9.59134	14.8472	22.6308	35.3985
93.54	1.8679	2.87473	3.31017	5.94394	9.59352	14.8502	22.6337	35.3999
93.64	1.86792	2.87478	3.31027	5.94525	9.5957	14.8533	22.6366	35.4012
93.74	1.86795	2.87483	3.31037	5.94656	9.59788	14.8563	22.6395	35.4025
93.84	1.86797	2.87488	3.31047	5.94787	9.60005	14.8593	22.6423	35.4038
93.94	1.868	2.87492	3.31056	5.94918	9.60222	14.8623	22.6452	35.4051
94.04	1.86802	2.87497	3.31066	5.95048	9.6044	14.8653	22.6481	35.4065
94.14	1.86805	2.87502	3.31076	5.95179	9.60657	14.8683	22.6509	35.4078
94.24	1.86807	2.87507	3.31085	5.95309	9.60874	14.8713	22.6538	35.4091
94.34	1.8681	2.87512	3.31095	5.9544	9.6109	14.8743	22.6567	35.4104
94.44	1.86812	2.87517	3.31105	5.9557	9.61307	14.8773	22.6595	35.4116
94.54	1.86814	2.87522	3.31114	5.957	9.61524	14.8803	22.6624	35.4129
94.64	1.86817	2.87527	3.31124	5.95831	9.6174	14.8832	22.6652	35.4142
94.74	1.86819	2.87531	3.31134	5.95961	9.61956	14.8862	22.668	35.4155
94.84	1.86822	2.87536	3.31144	5.96091	9.62172	14.8892	22.6709	35.4168
94.94	1.86824	2.87541	3.31153	5.96221	9.62388	14.8922	22.6737	35.418
95.04	1.86827	2.87546	3.31163	5.96351	9.62604	14.8952	22.6765	35.4193
95.14	1.86829	2.87551	3.31173	5.96481	9.6282	14.8981	22.6793	35.4206
95.24	1.86832	2.87556	3.31182	5.96611	9.63035	14.9011	22.6821	35.4218
95.34	1.86834	2.87561	3.31192	5.96741	9.63251	14.9041	22.6849	35.4231
95.44	1.86836	2.87566	3.31202	5.96871	9.63466	14.907	22.6877	35.4243
95.54	1.86839	2.8757	3.31211	5.97001	9.63681	14.91	22.6905	35.4256
95.64	1.86841	2.87575	3.31221	5.9713	9.63896	14.9129	22.6933	35.4268
95.74	1.86844	2.8758	3.31231	5.9726	9.64111	14.9159	22.6961	35.4281
95.84	1.86846	2.87585	3.3124	5.9739	9.64326	14.9188	22.6989	35.4293
95.94	1.86849	2.8759	3.3125	5.97519	9.6454	14.9218	22.7016	35.4305
96.04	1.86851	2.87595	3.3126	5.97649	9.64755	14.9247	22.7044	35.4318
96.14	1.86854	2.876	3.31269	5.97778	9.64969	14.9276	22.7072	35.433
96.24	1.86856	2.87604	3.31279	5.97907	9.65183	14.9306	22.7099	35.4342
96.34	1.86858	2.87609	3.31288	5.98037	9.65397	14.9335	22.7127	35.4354
96.44	1.86861	2.87614	3.31298	5.98166	9.65611	14.9364	22.7154	35.4366
96.54	1.86863	2.87619	3.31308	5.98295	9.65825	14.9394	22.7182	35.4378
96.64	1.86866	2.87624	3.31317	5.98424	9.66038	14.9423	22.7209	35.439
96.74	1.86868	2.87629	3.31327	5.98553	9.66252	14.9452	22.7236	35.4402
96.84	1.86871	2.87633	3.31337	5.98682	9.66465	14.9481	22.7264	35.4414
96.94	1.86873	2.87638	3.31346	5.98811	9.66678	14.951	22.7291	35.4426
97.04	1.86875	2.87643	3.31356	5.9894	9.66891	14.954	22.7318	35.4438
97.14	1.86878	2.87648	3.31366	5.99069	9.67104	14.9569	22.7345	35.445
97.24	1.8688	2.87653	3.31375	5.99198	9.67317	14.9598	22.7372	35.4461
97.34	1.86883	2.87658	3.31385	5.99326	9.6753	14.9627	22.7399	35.4473
97.44	1.86885	2.87663	3.31394	5.99455	9.67742	14.9656	22.7426	35.4485
97.54	1.86888	2.87667	3.31404	5.99584	9.67955	14.9685	22.7453	35.4496
97.64	1.8689	2.87672	3.31414	5.99712	9.68167	14.9714	22.748	35.4508
97.74	1.86892	2.87677	3.31423	5.99841	9.68379	14.9742	22.7507	35.4519
97.84	1.86895	2.87682	3.31433	5.99969	9.68591	14.9771	22.7534	35.4531
97.94	1.86897	2.87687	3.31442	6.00097	9.68803	14.98	22.756	35.4542
98.04	1.869	2.87692	3.31452	6.00226	9.69014	14.9829	22.7587	35.4554
98.14	1.86902	2.87696	3.31462	6.00354	9.69226	14.9858	22.7614	35.4565
98.24	1.86905	2.87701	3.31471	6.00482	9.69437	14.9887	22.764	35.4577
98.34	1.86907	2.87706	3.31481	6.0061	9.69649	14.9915	22.7667	35.4588
98.44	1.86909	2.87711	3.3149	6.00738	9.6986	14.9944	22.7693	35.4599
98.54	1.86912	2.87716	3.315	6.00866	9.70071	14.9973	22.772	35.4611
98.64	1.86914	2.87721	3.3151	6.00994	9.70282	15.0001	22.7746	35.4622
98.74	1.86917	2.87725	3.31519	6.01122	9.70492	15.003	22.7772	35.4633
98.84	1.86919	2.8773	3.31529	6.0125	9.70703	15.0058	22.7799	35.4644
98.94	1.86921	2.87735	3.31538	6.01378	9.70913	15.0087	22.7825	35.4655
99.04	1.86924	2.8774	3.31548	6.01505	9.71124	15.0115	22.7851	35.4666
99.14	1.86926	2.87745	3.31558	6.01633	9.71334	15.0144	22.7877	35.4677
99.24	1.86929	2.87749	3.31567	6.01761	9.71544	15.0172	22.7903	35.4688
99.34	1.86931	2.87754	3.31577	6.01888	9.71754	15.0201	22.7929	35.4699
99.44	1.86934	2.87759	3.31586	6.02016	9.71964	15.0229	22.7955	35.471
99.54	1.86936	2.87764	3.31596	6.02143	9.72173	15.0258	22.7981	35.4721
99.64	1.86938	2.87769	3.31605	6.02271	9.72383	15.0286	22.8007	35.4732
99.74	1.86941	2.87773	3.31615	6.02398	9.72592	15.0314	22.8033	35.4743
99.84	1.86943	2.87778	3.31625	6.02525	9.72801	15.0342	22.8059	35.4753
99.94	1.86946	2.87783	3.31634	6.02652	9.7301	15.0371	22.8085	35.4764
100.04	1.86948	2.87788	3.31644	6.0278	9.73219	15.0399	22.811	35.4775
100.14	1.8695	2.87793	3.31653	6.02907	9.73428	15.0427	22.8136	35.4785
100.24	1.86953	2.87798	3.31663	6.03034	9.73637	15.0455	22.8162	35.4796
100.34	1.86955	2.87802	3.31672	6.03161	9.73845	15.0483	22.8187	35.4807
100.44	1.86958	2.87807	3.31682	6.03288	9.74054	15.0511	22.8213	35.4817
100.54	1.8696	2.87812	3.31691	6.03414	9.74262	15.054	22.8238	35.4828
100.64	1.86962	2.87817	3.31701	6.03541	9.7447	15.0568	22.8264	35.4838
100.74	1.86965	2.87822	3.3171	6.03668	9.74678	15.0596	22.8289	35.4849
100.84	1.86967	2.87826	3.3172	6.03795	9.74886	15.0624	22.8315	35.4859
100.94	1.8697	2.87831	3.3173	6.03921	9.75094	15.0652	22.834	35.4869
101.04	1.86972	2.87836	3.31739	6.04048	9.75301	15.0679	22.8365	35.488
101.14	1.86974	2.87841	3.31749	6.04174	9.75509	15.0707	22.839	35.489
101.24	1.86977	2.87845	3.31758	6.04301	9.75716	15.0735	22.8416	35.49
101.34	1.86979	2.8785	3.31768	6.04427	9.75923	15.0763	22.8441	35.4911
101.44	1.86982	2.87855	3.31777	6.04554	9.76131	15.0791	22.8466	35.4921
101.54	1.86984	2.8786	3.31787	6.0468	9.76337	15.0819	22.8491	35.4931
101.64	1.86986	2.87865	3.31796	6.04806	9.76544	15.0846	22.8516	35.4941
101.74	1.86989	2.87869	3.31806	6.04932	9.76751	15.0874	22.8541	35.4951
101.84	1.86991	2.87874	3.31815	6.05058	9.76957	15.0902	22.8566	35.4961
101.94	1.86994	2.87879	3.31825	6.05185	9.77164	15.0929	22.859	35.4971
102.04	1.86996	2.87884	3.31834	6.05311	9.7737	15.0957	22.8615	35.4981
102.14	1.86998	2.87889	3.31844	6.05437	9.77576	15.0985	22.864	35.4991
102.24	1.87001	2.87893	3.31853	6.05562	9.77782	15.1012	22.8665	35.5001
102.34	1.87003	2.87898	3.31863	6.05688	9.77988	15.104	22.8689	35.5011
102.44	1.87006	2.87903	3.31872	6.05814	9.78194	15.1067	22.8714	35.5021
102.54	1.87008	2.87908	3.31882	6.0594	9.78399	15.1095	22.8739	35.5031
102.64	1.8701	2.87912	3.31891	6.06065	9.78605	15.1122	22.8763	35.504
102.74	1.87013	2.87917	3.31901	6.06191	9.7881	15.115	22.8788	35.505
102.84	1.87015	2.87922	3.3191	6.06317	9.79015	15.1177	22.8812	35.506
102.94	1.87018	2.87927	3.3192	6.06442	9.79221	15.1205	22.8836	35.507
103.04	1.8702	2.87932	3.31929	6.06568	9.79425	15.1232	22.8861	35.5079
103.14	1.87022	2.87936	3.31939	6.06693	9.7963	15.1259	22.8885	35.5089
103.24	1.87025	2.87941	3.31948	6.06818	9.79835	15.1287	22.8909	35.5098
103.34	1.87027	2.87946	3.31957	6.06944	9.8004	15.1314	22.8934	35.5108
103.44	1.8703	2.87951	3.31967	6.07069	9.80244	15.1341	22.8958	35.5117
103.54	1.87032	2.87955	3.31976	6.07194	9.80448	15.1368	22.8982	35.5127
103.64	1.87034	2.8796	3.31986	6.07319	9.80652	15.1395	22.9006	35.5136
103.74	1.87037	2.87965	3.31995	6.07444	9.80856	15.1423	22.903	35.5146
103.84	1.87039	2.8797	3.32005	6.07569	9.8106	15.145	22.9054	35.5155
103.94	1.87042	2.87974	3.32014	6.07694	9.81264	15.1477	22.9078	35.5165
104.04	1.87044	2.87979	3.32024	6.07819	9.81468	15.1504	22.9102	35.5174
104.14	1.87046	2.87984	3.32033	6.07944	9.81671	15.1531	22.9126	35.5183
104.24	1.87049	2.87989	3.32043	6.08068	9.81874	15.1558	22.915	35.5193
104.34	1.87051	2.87993	3.32052	6.08193	9.82078	15.1585	22.9173	35.5202
104.44	1.87053	2.87998	3.32061	6.08318	9.82281	15.1612	22.9197	35.5211
104.54	1.87056	2.88003	3.32071	6.08442	9.82484	15.1639	22.9221	35.522
104.64	1.87058	2.88008	3.3208	6.08567	9.82687	15.1666	22.9244	35.5229
104.74	1.87061	2.88012	3.3209	6.08691	9.82889	15.1693	22.9268	35.5238
104.84	1.87063	2.88017	3.32099	6.08816	9.83092	15.1719	22.9292	35.5247
104.94	1.87065	2.88022	3.32109	6.0894	9.83294	15.1746	22.9315	35.5257
105.04	1.87068	2.88027	3.32118	6.09065	9.83497	15.1773	22.9339	35.5266
105.14	1.8707	2.88031	3.32127	6.09189	9.83699	15.18	22.9362	35.5275
105.24	1.87072	2.88036	3.32137	6.09313	9.83901	15.1826	22.9385	35.5283
105.34	1.87075	2.88041	3.32146	6.09437	9.84103	15.1853	22.9409	35.5292
105.44	1.87077	2.88046	3.32156	6.09561	9.84304	15.188	22.9432	35.5301
105.54	1.8708	2.8805	3.32165	6.09685	9.84506	15.1906	22.9455	35.531
105.64	1.87082	2.88055	3.32175	6.09809	9.84708	15.1933	22.9479	35.5319
105.74	1.87084	2.8806	3.32184	6.09933	9.84909	15.196	22.9502	35.5328
105.84	1.87087	2.88065	3.32193	6.10057	9.8511	15.1986	22.9525	35.5337
105.94	1.87089	2.88069	3.32203	6.10181	9.85311	15.2013	22.9548	35.5345
106.04	1.87091	2.88074	3.32212	6.10305	9.85512	15.2039	22.9571	35.5354
106.14	1.87094	2.88079	3.32222	6.10428	9.85713	15.2066	22.9594	35.5363
106.24	1.87096	2.88083	3.32231	6.10552	9.85914	15.2092	22.9617	35.5371
106.34	1.87099	2.88088	3.3224	6.10676	9.86115	15.2119	22.964	35.538
106.44	1.87101	2.88093	3.3225	6.10799	9.86315	15.2145	22.9663	35.5389
106.54	1.87103	2.88098	3.32259	6.10923	9.86515	15.2171	22.9686	35.5397
106.64	1.87106	2.88102	3.32269	6.11046	9.86716	15.2198	22.9708	35.5406
106.74	1.87108	2.88107	3.32278	6.11169	9.86916	15.2224	22.9731	35.5414
106.84	1.8711	2.88112	3.32287	6.11293	9.87116	15.225	22.9754	35.5423
106.94	1.87113	2.88117	3.32297	6.11416	9.87316	15.2277	22.9777	35.5431
107.04	1.87115	2.88121	3.32306	6.11539	9.87515	15.2303	22.9799	35.544
107.14	1.87118	2.88126	3.32315	6.11662	9.87715	15.2329	22.9822	35.5448
107.24	1.8712	2.88131	3.32325	6.11786	9.87914	15.2355	22.9844	35.5456
107.34	1.87122	2.88135	3.32334	6.11909	9.88114	15.2381	22.9867	35.5465
107.44	1.87125	2.8814	3.32344	6.12032	9.88313	15.2408	22.9889	35.5473
107.54	1.87127	2.88145	3.32353	6.12154	9.88512	15.2434	22.9912	35.5481
107.64	1.87129	2.8815	3.32362	6.12277	9.88711	15.246	22.9934	35.549
107.74	1.87132	2.88154	3.32372	6.124	9.8891	15.2486	22.9957	35.5498
107.84	1.87134	2.88159	3.32381	6.12523	9.89108	15.2512	22.9979	35.5506
107.94	1.87136	2.88164	3.3239	6.12646	9.89307	15.2538	23.0001	35.5514
108.04	1.87139	2.88168	3.324	6.12768	9.89505	15.2564	23.0023	35.5522
108.14	1.87141	2.88173	3.32409	6.12891	9.89704	15.259	23.0046	35.553
108.24	1.87144	2.88178	3.32418	6.13013	9.89902	15.2616	23.0068	35.5539
108.34	1.87146	2.88182	3.32428	6.13136	9.901	15.2641	23.009	35.5547
108.44	1.87148	2.88187	3.32437	6.13258	9.90298	15.2667	23.0112	35.5555
108.54	1.87151	2.88192	3.32446	6.13381	9.90495	15.2693	23.0134	35.5563
108.64	1.87153	2.88197	3.32456	6.13503	9.90693	15.2719	23.0156	35.5571
108.74	1.87155	2.88201	3.32465	6.13625	9.90891	15.2745	23.0178	35.5579
108.84	1.87158	2.88206	3.32474	6.13748	9.91088	15.277	23.02	35.5587
108.94	1.8716	2.88211	3.32484	6.1387	9.91285	15.2796	23.0222	35.5594
109.04	1.87162	2.88215	3.32493	6.13992	9.91482	15.2822	23.0243	35.5602
109.14	1.87165	2.8822	3.32502	6.14114	9.91679	15.2848	23.0265	35.561
109.24	1.87167	2.88225	3.32512	6.14236	9.91876	15.2873	23.0287	35.5618
109.34	1.87169	2.88229	3.32521	6.14358	9.92073	15.2899	23.0309	35.5626
109.44	1.87172	2.88234	3.3253	6.1448	9.9227	15.2924	23.033	35.5634
109.54	1.87174	2.88239	3.3254	6.14601	9.92466	15.295	23.0352	35.5641
109.64	1.87177	2.88244	3.32549	6.14723	9.92663	15.2975	23.0374	35.5649
109.74	1.87179	2.88248	3.32558	6.14845	9.92859	15.3001	23.0395	35.5657
109.84	1.87181	2.88253	3.32568	6.14967	9.93055	15.3026	23.0417	35.5664
109.94	1.87184	2.88258	3.32577	6.15088	9.93251	15.3052	23.0438	35.5672
110.04	1.87186	2.88262	3.32586	6.1521	9.93447	15.3077	23.046	35.568
110.14	1.87188	2.88267	3.32596	6.15331	9.93643	15.3103	23.0481	35.5687
110.24	1.87191	2.88272	3.32605	6.15453	9.93838	15.3128	23.0502	35.5695
110.34	1.87193	2.88276	3.32614	6.15574	9.94034	15.3153	23.0524	35.5702
110.44	1.87195	2.88281	3.32623	6.15695	9.94229	15.3179	23.0545	35.571
110.54	1.87198	2.88286	3.32633	6.15817	9.94424	15.3204	23.0566	35.5717
110.64	1.872	2.8829	3.32642	6.15938	9.94619	15.3229	23.0587	35.5725
110.74	1.87202	2.88295	3.32651	6.16059	9.94814	15.3255	23.0608	35.5732
110.84	1.87205	2.883	3.32661	6.1618	9.95009	15.328	23.063	35.574
110.94	1.87207	2.88304	3.3267	6.16301	9.95204	15.3305	23.0651	35.5747
111.04	1.87209	2.88309	3.32679	6.16422	9.95398	15.333	23.0672	35.5754
111.14	1.87212	2.88314	3.32688	6.16543	9.95593	15.3355	23.0693	35.5762
111.24	1.87214	2.88318	3.32698	6.16664	9.95787	15.338	23.0714	35.5769
111.34	1.87216	2.88323	3.32707	6.16785	9.95982	15.3406	23.0735	35.5776
111.44	1.87219	2.88328	3.32716	6.16906	9.96176	15.3431	23.0755	35.5783
111.54	1.87221	2.88332	3.32725	6.17026	9.9637	15.3456	23.0776	35.5791
111.64	1.87223	2.88337	3.32735	6.17147	9.96563	15.3481	23.0797	35.5798
111.74	1.87226	2.88342	3.32744	6.17268	9.96757	15.3506	23.0818	35.5805
111.84	1.87228	2.88346	3.32753	6.17388	9.96951	15.3531	23.0839	35.5812
111.94	1.8723	2.88351	3.32762	6.17509	9.97144	15.3556	23.0859	35.5819
112.04	1.87233	2.88356	3.32772	6.17629	9.97338	15.358	23.088	35.5827
112.14	1.87235	2.8836	3.32781	6.1775	9.97531	15.3605	23.0901	35.5834
112.24	1.87237	2.88365	3.3279	6.1787	9.97724	15.363	23.0921	35.5841
112.34	1.8724	2.8837	3.32799	6.1799	9.97917	15.3655	23.0942	35.5848
112.44	1.87242	2.88374	3.32809	6.18111	9.9811	15.368	23.0962	35.5855
112.54	1.87244	2.88379	3.32818	6.18231	9.98302	15.3705	23.0983	35.5862
112.64	1.87247	2.88384	3.32827	6.18351	9.98495	15.3729	23.1003	35.5869
112.74	1.87249	2.88388	3.32836	6.18471	9.98688	15.3754	23.1024	35.5876
112.84	1.87251	2.88393	3.32846	6.18591	9.9888	15.3779	23.1044	35.5883
112.94	1.87254	2.88398	3.32855	6.18711	9.99072	15.3803	23.1064	35.5889
113.04	1.87256	2.88402	3.32864	6.18831	9.99264	15.3828	23.1085	35.5896
113.14	1.87258	2.88407	3.32873	6.18951	9.99456	15.3853	23.1105	35.5903
113.24	1.87261	2.88411	3.32883	6.19071	9.99648	15.3877	23.1125	35.591
113.34	1.87263	2.88416	3.32892	6.1919	9.9984	15.3902	23.1145	35.5917
113.44	1.87265	2.88421	3.32901	6.1931	10.0003	15.3926	23.1165	35.5924
113.54	1.87268	2.88425	3.3291	6.1943	10.0022	15.3951	23.1185	35.593
113.64	1.8727	2.8843	3.32919	6.19549	10.0041	15.3975	23.1206	35.5937
113.74	1.87272	2.88435	3.32929	6.19669	10.0061	15.4	23.1226	35.5944
113.84	1.87275	2.88439	3.32938	6.19788	10.008	15.4024	23.1246	35.595
113.94	1.87277	2.88444	3.32947	6.19908	10.0099	15.4049	23.1266	35.5957
114.04	1.87279	2.88449	3.32956	6.20027	10.0118	15.4073	23.1285	35.5964
114.14	1.87282	2.88453	3.32965	6.20147	10.0137	15.4097	23.1305	35.597
114.24	1.87284	2.88458	3.32975	6.20266	10.0156	15.4122	23.1325	35.5977
114.34	1.87286	2.88462	3.32984	6.20385	10.0175	15.4146	23.1345	35.5984
114.44	1.87289	2.88467	3.32993	6.20504	10.0194	15.417	23.1365	35.599
114.54	1.87291	2.88472	3.33002	6.20623	10.0213	15.4195	23.1385	35.5997
114.64	1.87293	2.88476	3.33011	6.20742	10.0232	15.4219	23.1404	35.6003
114.74	1.87296	2.88481	3.33021	6.20861	10.0251	15.4243	23.1424	35.601
114.84	1.87298	2.88486	3.3303	6.2098	10.027	15.4267	23.1444	35.6016
114.94	1.873	2.8849	3.33039	6.21099	10.0289	15.4292	23.1463	35.6023
115.04	1.87303	2.88495	3.33048	6.21218	10.0308	15.4316	23.1483	35.6029
115.14	1.87305	2.88499	3.33057	6.21337	10.0327	15.434	23.1502	35.6035
115.24	1.87307	2.88504	3.33067	6.21456	10.0346	15.4364	23.1522	35.6042
115.34	1.8731	2.88509	3.33076	6.21574	10.0365	15.4388	23.1541	35.6048
115.44	1.87312	2.88513	3.33085	6.21693	10.0384	15.4412	23.1561	35.6054
115.54	1.87314	2.88518	3.33094	6.21811	10.0403	15.4436	23.158	35.6061
115.64	1.87317	2.88523	3.33103	6.2193	10.0422	15.446	23.1599	35.6067
115.74	1.87319	2.88527	3.33112	6.22048	10.044	15.4484	23.1619	35.6073
115.84	1.87321	2.88532	3.33122	6.22167	10.0459	15.4508	23.1638	35.608
115.94	1.87323	2.88536	3.33131	6.22285	10.0478	15.4532	23.1657	35.6086
116.04	1.87326	2.88541	3.3314	6.22404	10.0497	15.4556	23.1676	35.6092
116.14	1.87328	2.88546	3.33149	6.22522	10.0516	15.458	23.1696	35.6098
116.24	1.8733	2.8855	3.33158	6.2264	10.0535	15.4603	23.1715	35.6104
116.34	1.87333	2.88555	3.33167	6.22758	10.0553	15.4627	23.1734	35.6111
116.44	1.87335	2.88559	3.33176	6.22876	10.0572	15.4651	23.1753	35.6117
116.54	1.87337	2.88564	3.33186	6.22994	10.0591	15.4675	23.1772	35.6123
116.64	1.8734	2.88569	3.33195	6.23112	10.061	15.4699	23.1791	35.6129
116.74	1.87342	2.88573	3.33204	6.2323	10.0629	15.4722	23.181	35.6135
116.84	1.87344	2.88578	3.33213	6.23348	10.0647	15.4746	23.1829	35.6141
116.94	1.87347	2.88582	3.33222	6.23466	10.0666	15.477	23.1848	35.6147
117.04	1.87349	2.88587	3.33231	6.23584	10.0685	15.4793	23.1866	35.6153
117.14	1.87351	2.88592	3.3324	6.23701	10.0703	15.4817	23.1885	35.6159
117.24	1.87353	2.88596	3.33249	6.23819	10.0722	15.484	23.1904	35.6165
117.34	1.87356	2.88601	3.33259	6.23937	10.0741	15.4864	23.1923	35.6171
117.44	1.87358	2.88605	3.33268	6.24054	10.0759	15.4888	23.1942	35.6177
117.54	1.8736	2.8861	3.33277	6.24172	10.0778	15.4911	23.196	35.6183
117.64	1.87363	2.88615	3.33286	6.24289	10.0797	15.4935	23.1979	35.6189
117.74	1.87365	2.88619	3.33295	6.24407	10.0815	15.4958	23.1998	35.6194
117.84	1.87367	2.88624	3.33304	6.24524	10.0834	15.4982	23.2016	35.62
117.94	1.8737	2.88628	3.33313	6.24641	10.0853	15.5005	23.2035	35.6206
118.04	1.87372	2.88633	3.33322	6.24759	10.0871	15.5028	23.2053	35.6212
118.14	1.87374	2.88638	3.33332	6.24876	10.089	15.5052	23.2072	35.6218
118.24	1.87377	2.88642	3.33341	6.24993	10.0908	15.5075	23.209	35.6223
118.34	1.87379	2.88647	3.3335	6.2511	10.0927	15.5098	23.2109	35.6229
118.44	1.87381	2.88651	3.33359	6.25227	10.0946	15.5122	23.2127	35.6235
118.54	1.87383	2.88656	3.33368	6.25344	10.0964	15.5145	23.2145	35.6241
118.64	1.87386	2.8866	3.33377	6.25461	10.0983	15.5168	23.2164	35.6246
118.74	1.87388	2.88665	3.33386	6.25578	10.1001	15.5191	23.2182	35.6252
118.84	1.8739	2.8867	3.33395	6.25695	10.102	15.5215	23.22	35.6258
118.94	1.87393	2.88674	3.33404	6.25811	10.1038	15.5238	23.2218	35.6263
119.04	1.87395	2.88679	3.33413	6.25928	10.1057	15.5261	23.2237	35.6269
119.14	1.87397	2.88683	3.33422	6.26045	10.1075	15.5284	23.2255	35.6274
119.24	1.87399	2.88688	3.33431	6.26161	10.1094	15.5307	23.2273	35.628
119.34	1.87402	2.88692	3.33441	6.26278	10.1112	15.533	23.2291	35.6285
119.44	1.87404	2.88697	3.3345	6.26395	10.113	15.5353	23.2309	35.6291
119.54	1.87406	2.88702	3.33459	6.26511	10.1149	15.5376	23.2327	35.6296
119.64	1.87409	2.88706	3.33468	6.26627	10.1167	15.5399	23.2345	35.6302
119.74	1.87411	2.88711	3.33477	6.26744	10.1186	15.5422	23.2363	35.6307
119.84	1.87413	2.88715	3.33486	6.2686	10.1204	15.5445	23.2381	35.6313
119.94	1.87416	2.8872	3.33495	6.26976	10.1222	15.5468	23.2399	35.6318
120.04	1.87418	2.88724	3.33504	6.27093	10.1241	15.5491	23.2417	35.6324
120.14	1.8742	2.88729	3.33513	6.27209	10.1259	15.5514	23.2434	35.6329
120.24	1.87422	2.88734	3.33522	6.27325	10.1277	15.5537	23.2452	35.6335
120.34	1.87425	2.88738	3.33531	6.27441	10.1296	15.556	23.247	35.634
120.44	1.87427	2.88743	3.3354	6.27557	10.1314	15.5583	23.2488	35.6345
120.54	1.87429	2.88747	3.33549	6.27673	10.1332	15.5605	23.2505	35.6351
120.64	1.87432	2.88752	3.33558	6.27789	10.1351	15.5628	23.2523	35.6356
120.74	1.87434	2.88756	3.33567	6.27904	10.1369	15.5651	23.2541	35.6361
120.84	1.87436	2.88761	3.33576	6.2802	10.1387	15.5674	23.2558	35.6366
120.94	1.87438	2.88765	3.33585	6.28136	10.1405	15.5696	23.2576	35.6372
121.04	1.87441	2.8877	3.33594	6.28252	10.1424	15.5719	23.2593	35.6377
121.14	1.87443	2.88775	3.33603	6.28367	10.1442	15.5742	23.2611	35.6382
121.24	1.87445	2.88779	3.33613	6.28483	10.146	15.5764	23.2628	35.6387
121.34	1.87448	2.88784	3.33622	6.28598	10.1478	15.5787	23.2646	35.6393
121.44	1.8745	2.88788	3.33631	6.28714	10.1497	15.581	23.2663	35.6398
121.54	1.87452	2.88793	3.3364	6.28829	10.1515	15.5832	23.268	35.6403
121.64	1.87454	2.88797	3.33649	6.28945	10.1533	15.5855	23.2698	35.6408
121.74	1.87457	2.88802	3.33658	6.2906	10.1551	15.5877	23.2715	35.6413
121.84	1.87459	2.88806	3.33667	6.29175	10.1569	15.59	23.2732	35.6418
121.94	1.87461	2.88811	3.33676	6.2929	10.1587	15.5922	23.275	35.6423
122.04	1.87463	2.88815	3.33685	6.29406	10.1605	15.5945	23.2767	35.6428
122.14	1.87466	2.8882	3.33694	6.29521	10.1624	15.5967	23.2784	35.6433
122.24	1.87468	2.88824	3.33703	6.29636	10.1642	15.5989	23.2801	35.6438
122.34	1.8747	2.88829	3.33712	6.29751	10.166	15.6012	23.2818	35.6443
122.44	1.87473	2.88834	3.33721	6.29866	10.1678	15.6034	23.2835	35.6448
122.54	1.87475	2.88838	3.3373	6.29981	10.1696	15.6057	23.2852	35.6453
122.64	1.87477	2.88843	3.33739	6.30095	10.1714	15.6079	23.2869	35.6458
122.74	1.87479	2.88847	3.33748	6.3021	10.1732	15.6101	23.2886	35.6463
122.84	1.87482	2.88852	3.33757	6.30325	10.175	15.6123	23.2903	35.6468
122.94	1.87484	2.88856	3.33766	6.3044	10.1768	15.6146	23.292	35.6473
123.04	1.87486	2.88861	3.33775	6.30554	10.1786	15.6168	23.2937	35.6478
123.14	1.87489	2.88865	3.33784	6.30669	10.1804	15.619	23.2954	35.6483
123.24	1.87491	2.8887	3.33793	6.30783	10.1822	15.6212	23.2971	35.6488
123.34	1.87493	2.88874	3.33802	6.30898	10.184	15.6234	23.2988	35.6493
123.44	1.87495	2.88879	3.33811	6.31012	10.1858	15.6256	23.3005	35.6497
123.54	1.87498	2.88883	3.3382	6.31127	10.1876	15.6279	23.3021	35.6502
123.64	1.875	2.88888	3.33828	6.31241	10.1894	15.6301	23.3038	35.6507
123.74	1.87502	2.88892	3.33837	6.31355	10.1912	15.6323	23.3055	35.6512
123.84	1.87504	2.88897	3.33846	6.31469	10.193	15.6345	23.3071	35.6517
123.94	1.87507	2.88901	3.33855	6.31584	10.1948	15.6367	23.3088	35.6521
124.04	1.87509	2.88906	3.33864	6.31698	10.1965	15.6389	23.3105	35.6526
124.14	1.87511	2.8891	3.33873	6.31812	10.1983	15.6411	23.3121	35.6531
124.24	1.87513	2.88915	3.33882	6.31926	10.2001	15.6433	23.3138	35.6535
124.34	1.87516	2.88919	3.33891	6.3204	10.2019	15.6454	23.3154	35.654
124.44	1.87518	2.88924	3.339	6.32154	10.2037	15.6476	23.3171	35.6545
124.54	1.8752	2.88928	3.33909	6.32268	10.2055	15.6498	23.3187	35.6549
124.64	1.87523	2.88933	3.33918	6.32381	10.2073	15.652	23.3204	35.6554
124.74	1.87525	2.88937	3.33927	6.32495	10.209	15.6542	23.322	35.6559
124.84	1.87527	2.88942	3.33936	6.32609	10.2108	15.6564	23.3236	35.6563
124.94	1.87529	2.88947	3.33945	6.32723	10.2126	15.6585	23.3253	35.6568
125.04	1.87532	2.88951	3.33954	6.32836	10.2144	15.6607	23.3269	35.6572
125.14	1.87534	2.88956	3.33963	6.3295	10.2161	15.6629	23.3285	35.6577
125.24	1.87536	2.8896	3.33972	6.33063	10.2179	15.6651	23.3301	35.6582
125.34	1.87538	2.88965	3.33981	6.33177	10.2197	15.6672	23.3318	35.6586
125.44	1.87541	2.88969	3.3399	6.3329	10.2215	15.6694	23.3334	35.6591
125.54	1.87543	2.88974	3.33998	6.33403	10.2232	15.6716	23.335	35.6595
125.64	1.87545	2.88978	3.34007	6.33517	10.225	15.6737	23.3366	35.66
125.74	1.87547	2.88982	3.34016	6.3363	10.2268	15.6759	23.3382	35.6604
125.84	1.8755	2.88987	3.34025	6.33743	10.2286	15.678	23.3398	35.6609
125.94	1.87552	2.88991	3.34034	6.33856	10.2303	15.6802	23.3414	35.6613
126.04	1.87554	2.88996	3.34043	6.33969	10.2321	15.6824	23.343	35.6617
126.14	1.87556	2.89	3.34052	6.34083	10.2338	15.6845	23.3446	35.6622
126.24	1.87559	2.89005	3.34061	6.34196	10.2356	15.6867	23.3462	35.6626
126.34	1.87561	2.89009	3.3407	6.34308	10.2374	15.6888	23.3478	35.6631
126.44	1.87563	2.89014	3.34079	6.34421	10.2391	15.6909	23.3494	35.6635
126.54	1.87565	2.89018	3.34088	6.34534	10.2409	15.6931	23.351	35.6639
126.64	1.87568	2.89023	3.34097	6.34647	10.2427	15.6952	23.3526	35.6644
126.74	1.8757	2.89027	3.34105	6.3476	10.2444	15.6974	23.3541	35.6648
126.84	1.87572	2.89032	3.34114	6.34872	10.2462	15.6995	23.3557	35.6652
126.94	1.87574	2.89036	3.34123	6.34985	10.2479	15.7016	23.3573	35.6656
127.04	1.87577	2.89041	3.34132	6.35098	10.2497	15.7038	23.3589	35.6661
127.14	1.87579	2.89045	3.34141	6.3521	10.2514	15.7059	23.3604	35.6665
127.24	1.87581	2.8905	3.3415	6.35323	10.2532	15.708	23.362	35.6669
127.34	1.87583	2.89054	3.34159	6.35435	10.2549	15.7101	23.3636	35.6673
127.44	1.87586	2.89059	3.34168	6.35548	10.2567	15.7123	23.3651	35.6678
127.54	1.87588	2.89063	3.34177	6.3566	10.2584	15.7144	23.3667	35.6682
127.64	1.8759	2.89068	3.34185	6.35772	10.2602	15.7165	23.3682	35.6686
127.74	1.87592	2.89072	3.34194	6.35884	10.2619	15.7186	23.3698	35.669
127.84	1.87595	2.89077	3.34203	6.35997	10.2637	15.7207	23.3713	35.6694
127.94	1.87597	2.89081	3.34212	6.36109	10.2654	15.7228	23.3729	35.6699
128.04	1.87599	2.89086	3.34221	6.36221	10.2672	15.725	23.3744	35.6703
128.14	1.87601	2.8909	3.3423	6.36333	10.2689	15.7271	23.376	35.6707
128.24	1.87604	2.89094	3.34239	6.36445	10.2707	15.7292	23.3775	35.6711
128.34	1.87606	2.89099	3.34247	6.36557	10.2724	15.7313	23.379	35.6715
128.44	1.87608	2.89103	3.34256	6.36669	10.2741	15.7334	23.3806	35.6719
128.54	1.8761	2.89108	3.34265	6.3678	10.2759	15.7355	23.3821	35.6723
128.64	1.87613	2.89112	3.34274	6.36892	10.2776	15.7376	23.3836	35.6727
128.74	1.87615	2.89117	3.34283	6.37004	10.2793	15.7397	23.3851	35.6731
128.84	1.87617	2.89121	3.34292	6.37116	10.2811	15.7417	23.3867	35.6735
128.94	1.87619	2.89126	3.34301	6.37227	10.2828	15.7438	23.3882	35.6739
129.04	1.87621	2.8913	3.34309	6.37339	10.2845	15.7459	23.3897	35.6743
129.14	1.87624	2.89135	3.34318	6.3745	10.2863	15.748	23.3912	35.6747
129.24	1.87626	2.89139	3.34327	6.37562	10.288	15.7501	23.3927	35.6751
129.34	1.87628	2.89144	3.34336	6.37673	10.2897	15.7522	23.3942	35.6755
129.44	1.8763	2.89148	3.34345	6.37785	10.2915	15.7542	23.3957	35.6759
129.54	1.87633	2.89152	3.34354	6.37896	10.2932	15.7563	23.3972	35.6763
129.64	1.87635	2.89157	3.34362	6.38007	10.2949	15.7584	23.3987	35.6767
129.74	1.87637	2.89161	3.34371	6.38119	10.2966	15.7605	23.4002	35.6771
129.84	1.87639	2.89166	3.3438	6.3823	10.2984	15.7625	23.4017	35.6775
129.94	1.87642	2.8917	3.34389	6.38341	10.3001	15.7646	23.4032	35.6779
130.04	1.87644	2.89175	3.34398	6.38452	10.3018	15.7667	23.4047	35.6782
130.14	1.87646	2.89179	3.34407	6.38563	10.3035	15.7687	23.4062	35.6786
130.24	1.87648	2.89184	3.34415	6.38674	10.3052	15.7708	23.4077	35.679
130.34	1.87651	2.89188	3.34424	6.38785	10.307	15.7729	23.4091	35.6794
130.44	1.87653	2.89192	3.34433	6.38896	10.3087	15.7749	23.4106	35.6798
130.54	1.87655	2.89197	3.34442	6.39007	10.3104	15.777	23.4121	35.6801
130.64	1.87657	2.89201	3.34451	6.39117	10.3121	15.779	23.4136	35.6805
130.74	1.87659	2.89206	3.34459	6.39228	10.3138	15.7811	23.415	35.6809
130.84	1.87662	2.8921	3.34468	6.39339	10.3155	15.7831	23.4165	35.6813
130.94	1.87664	2.89215	3.34477	6.39449	10.3172	15.7852	23.418	35.6816
131.04	1.87666	2.89219	3.34486	6.3956	10.3189	15.7872	23.4194	35.682
131.14	1.87668	2.89224	3.34495	6.39671	10.3207	15.7893	23.4209	35.6824
131.24	1.87671	2.89228	3.34503	6.39781	10.3224	15.7913	23.4223	35.6828
131.34	1.87673	2.89232	3.34512	6.39891	10.3241	15.7933	23.4238	35.6831
131.44	1.87675	2.89237	3.34521	6.40002	10.3258	15.7954	23.4252	35.6835
131.54	1.87677	2.89241	3.3453	6.40112	10.3275	15.7974	23.4267	35.6839
131.64	1.87679	2.89246	3.34539	6.40222	10.3292	15.7994	23.4281	35.6842
131.74	1.87682	2.8925	3.34547	6.40333	10.3309	15.8015	23.4296	35.6846
131.84	1.87684	2.89255	3.34556	6.40443	10.3326	15.8035	23.431	35.685
131.94	1.87686	2.89259	3.34565	6.40553	10.3343	15.8055	23.4324	35.6853
132.04	1.87688	2.89263	3.34574	6.40663	10.336	15.8075	23.4339	35.6857
132.14	1.87691	2.89268	3.34582	6.40773	10.3377	15.8096	23.4353	35.686
132.24	1.87693	2.89272	3.34591	6.40883	10.3394	15.8116	23.4367	35.6864
132.34	1.87695	2.89277	3.346	6.40993	10.3411	15.8136	23.4382	35.6868
132.44	1.87697	2.89281	3.34609	6.41103	10.3428	15.8156	23.4396	35.6871
132.54	1.87699	2.89285	3.34617	6.41213	10.3445	15.8176	23.441	35.6875
132.64	1.87702	2.8929	3.34626	6.41323	10.3462	15.8196	23.4424	35.6878
132.74	1.87704	2.89294	3.34635	6.41432	10.3478	15.8216	23.4438	35.6882
132.84	1.87706	2.89299	3.34644	6.41542	10.3495	15.8236	23.4453	35.6885
132.94	1.87708	2.89303	3.34652	6.41652	10.3512	15.8256	23.4467	35.6889
133.04	1.87711	2.89308	3.34661	6.41761	10.3529	15.8276	23.4481	35.6892
133.14	1.87713	2.89312	3.3467	6.41871	10.3546	15.8296	23.4495	35.6896
133.24	1.87715	2.89316	3.34679	6.4198	10.3563	15.8316	23.4509	35.6899
133.34	1.87717	2.89321	3.34687	6.4209	10.358	15.8336	23.4523	35.6903
133.44	1.87719	2.89325	3.34696	6.42199	10.3597	15.8356	23.4537	35.6906
133.54	1.87722	2.8933	3.34705	6.42308	10.3613	15.8376	23.4551	35.6909
133.64	1.87724	2.89334	3.34714	6.42418	10.363	15.8396	23.4565	35.6913
133.74	1.87726	2.89338	3.34722	6.42527	10.3647	15.8416	23.4579	35.6916
133.84	1.87728	2.89343	3.34731	6.42636	10.3664	15.8436	23.4593	35.692
133.94	1.8773	2.89347	3.3474	6.42745	10.3681	15.8456	23.4606	35.6923
134.04	1.87733	2.89352	3.34749	6.42854	10.3697	15.8476	23.462	35.6926
134.14	1.87735	2.89356	3.34757	6.42963	10.3714	15.8495	23.4634	35.693
134.24	1.87737	2.8936	3.34766	6.43072	10.3731	15.8515	23.4648	35.6933
134.34	1.87739	2.89365	3.34775	6.43181	10.3748	15.8535	23.4662	35.6936
134.44	1.87741	2.89369	3.34783	6.4329	10.3764	15.8555	23.4675	35.694
134.54	1.87744	2.89374	3.34792	6.43399	10.3781	15.8574	23.4689	35.6943
134.64	1.87746	2.89378	3.34801	6.43508	10.3798	15.8594	23.4703	35.6946
134.74	1.87748	2.89382	3.3481	6.43617	10.3814	15.8614	23.4716	35.695
134.84	1.8775	2.89387	3.34818	6.43725	10.3831	15.8633	23.473	35.6953
134.94	1.87752	2.89391	3.34827	6.43834	10.3848	15.8653	23.4744	35.6956
135.04	1.87755	2.89395	3.34836	6.43943	10.3864	15.8673	23.4757	35.6959
135.14	1.87757	2.894	3.34844	6.44051	10.3881	15.8692	23.4771	35.6963
135.24	1.87759	2.89404	3.34853	6.4416	10.3898	15.8712	23.4784	35.6966
135.34	1.87761	2.89409	3.34862	6.44268	10.3914	15.8731	23.4798	35.6969
135.44	1.87763	2.89413	3.34871	6.44377	10.3931	15.8751	23.4811	35.6972
135.54	1.87766	2.89417	3.34879	6.44485	10.3948	15.877	23.4825	35.6976
135.64	1.87768	2.89422	3.34888	6.44593	10.3964	15.879	23.4838	35.6979
135.74	1.8777	2.89426	3.34897	6.44702	10.3981	15.8809	23.4851	35.6982
135.84	1.87772	2.89431	3.34905	6.4481	10.3997	15.8829	23.4865	35.6985
135.94	1.87774	2.89435	3.34914	6.44918	10.4014	15.8848	23.4878	35.6988
136.04	1.87777	2.89439	3.34923	6.45026	10.403	15.8867	23.4892	35.6991
136.14	1.87779	2.89444	3.34931	6.45134	10.4047	15.8887	23.4905	35.6995
136.24	1.87781	2.89448	3.3494	6.45242	10.4064	15.8906	23.4918	35.6998
136.34	1.87783	2.89452	3.34949	6.4535	10.408	15.8926	23.4931	35.7001
136.44	1.87785	2.89457	3.34957	6.45458	10.4097	15.8945	23.4945	35.7004
136.54	1.87788	2.89461	3.34966	6.45566	10.4113	15.8964	23.4958	35.7007
136.64	1.8779	2.89466	3.34975	6.45674	10.413	15.8983	23.4971	35.701
136.74	1.87792	2.8947	3.34983	6.45782	10.4146	15.9003	23.4984	35.7013
136.84	1.87794	2.89474	3.34992	6.45889	10.4162	15.9022	23.4997	35.7016
136.94	1.87796	2.89479	3.35001	6.45997	10.4179	15.9041	23.501	35.7019
137.04	1.87799	2.89483	3.35009	6.46105	10.4195	15.906	23.5023	35.7022
137.14	1.87801	2.89487	3.35018	6.46212	10.4212	15.908	23.5037	35.7025
137.24	1.87803	2.89492	3.35027	6.4632	10.4228	15.9099	23.505	35.7028
137.34	1.87805	2.89496	3.35035	6.46427	10.4245	15.9118	23.5063	35.7031
137.44	1.87807	2.895	3.35044	6.46535	10.4261	15.9137	23.5076	35.7034
137.54	1.8781	2.89505	3.35053	6.46642	10.4277	15.9156	23.5089	35.7037
137.64	1.87812	2.89509	3.35061	6.46749	10.4294	15.9175	23.5102	35.704
137.74	1.87814	2.89514	3.3507	6.46857	10.431	15.9194	23.5114	35.7043
137.84	1.87816	2.89518	3.35078	6.46964	10.4327	15.9213	23.5127	35.7046
137.94	1.87818	2.89522	3.35087	6.47071	10.4343	15.9232	23.514	35.7049
138.04	1.87821	2.89527	3.35096	6.47178	10.4359	15.9251	23.5153	35.7052
138.14	1.87823	2.89531	3.35104	6.47285	10.4376	15.927	23.5166	35.7055
138.24	1.87825	2.89535	3.35113	6.47392	10.4392	15.9289	23.5179	35.7058
138.34	1.87827	2.8954	3.35122	6.47499	10.4408	15.9308	23.5192	35.7061
138.44	1.87829	2.89544	3.3513	6.47606	10.4425	15.9327	23.5204	35.7064
138.54	1.87831	2.89548	3.35139	6.47713	10.4441	15.9346	23.5217	35.7067
138.64	1.87834	2.89553	3.35148	6.4782	10.4457	15.9365	23.523	35.707
138.74	1.87836	2.89557	3.35156	6.47927	10.4473	15.9384	23.5242	35.7072
138.84	1.87838	2.89561	3.35165	6.48034	10.449	15.9403	23.5255	35.7075
138.94	1.8784	2.89566	3.35173	6.4814	10.4506	15.9422	23.5268	35.7078
139.04	1.87842	2.8957	3.35182	6.48247	10.4522	15.944	23.528	35.7081
139.14	1.87845	2.89574	3.35191	6.48354	10.4538	15.9459	23.5293	35.7084
139.24	1.87847	2.89579	3.35199	6.4846	10.4555	15.9478	23.5306	35.7087
139.34	1.87849	2.89583	3.35208	6.48567	10.4571	15.9497	23.5318	35.7089
139.44	1.87851	2.89587	3.35216	6.48673	10.4587	15.9515	23.5331	35.7092
139.54	1.87853	2.89592	3.35225	6.4878	10.4603	15.9534	23.5343	35.7095
139.64	1.87855	2.89596	3.35234	6.48886	10.4619	15.9553	23.5356	35.7098
139.74	1.87858	2.896	3.35242	6.48992	10.4635	15.9571	23.5368	35.7101
[truncated: 2,203 more rows]

## Sheet: Figure 2F
time s	80 nM	625 nM	1250 nM	2500 nM	5000 nM
-60.06	-0.0939941	-0.209717	-0.253662	-0.349854	-0.349853
-59.96	-0.0893555	-0.248779	-0.244385	-0.356934	-0.340576
-59.86	-0.0847168	-0.303467	-0.249023	-0.361572	-0.341309
-59.76	-0.0776367	-0.322266	-0.241211	-0.380371	-0.341309
-59.66	-0.0861816	-0.322266	-0.229492	-0.375732	-0.338134
-59.56	-0.0698242	-0.313721	-0.220947	-0.356934	-0.317139
-59.46	-0.072998	-0.346436	-0.22876	-0.360107	-0.321778
-59.36	-0.0854492	-0.404297	-0.241211	-0.372559	-0.329591
-59.26	-0.097168	-0.423828	-0.265381	-0.385742	-0.345947
-59.16	-0.0783691	-0.391846	-0.249023	-0.36792	-0.329588
-59.06	-0.0769043	-0.317627	-0.22876	-0.360107	-0.309326
-58.96	-0.081543	-0.271484	-0.233398	-0.373291	-0.313965
-58.86	-0.0925293	-0.251221	-0.24585	-0.371826	-0.324952
-58.76	-0.113525	-0.264404	-0.285645	-0.385742	-0.366211
-58.66	-0.140869	-0.26123	-0.307617	-0.388184	-0.396728
-58.56	-0.151123	-0.250488	-0.31543	-0.376465	-0.395264
-58.46	-0.1604	-0.252686	-0.327148	-0.376465	-0.408448
-58.36	-0.170654	-0.262939	-0.330322	-0.375	-0.39917
-58.26	-0.183838	-0.255859	-0.34668	-0.381104	-0.39209
-58.16	-0.179199	-0.255859	-0.351318	-0.381104	-0.39209
-58.06	-0.171387	-0.248047	-0.347412	-0.380371	-0.384277
-57.96	-0.168213	-0.256592	-0.345947	-0.375732	-0.381103
-57.86	-0.159668	-0.235596	-0.327148	-0.356934	-0.376465
-57.76	-0.159668	-0.228516	-0.327148	-0.35376	-0.371826
-57.66	-0.159668	-0.228516	-0.32251	-0.344482	-0.356934
-57.56	-0.162842	-0.228516	-0.31543	-0.349121	-0.351563
-57.46	-0.162842	-0.223877	-0.307617	-0.341309	-0.345947
-57.36	-0.147949	-0.205811	-0.299805	-0.321777	-0.333496
-57.26	-0.159668	-0.196533	-0.299805	-0.324951	-0.333496
-57.16	-0.159668	-0.197266	-0.299805	-0.32959	-0.333496
-57.06	-0.151855	-0.197266	-0.307617	-0.32959	-0.333496
-56.96	-0.133057	-0.190186	-0.300537	-0.330322	-0.326417
-56.86	-0.140137	-0.197266	-0.307617	-0.337402	-0.345215
-56.76	-0.140137	-0.197266	-0.307617	-0.337402	-0.345215
-56.66	-0.147949	-0.208984	-0.307617	-0.342041	-0.345215
-56.56	-0.147949	-0.204346	-0.307617	-0.349121	-0.340576
-56.46	-0.13623	-0.182373	-0.29126	-0.332764	-0.321777
-56.36	-0.143311	-0.173096	-0.28418	-0.325684	-0.321777
-56.26	-0.13623	-0.162842	-0.295898	-0.325684	-0.318603
-56.16	-0.128418	-0.150391	-0.288086	-0.32959	-0.313965
-56.06	-0.133057	-0.145752	-0.288086	-0.32959	-0.313965
-55.96	-0.135498	-0.146484	-0.288086	-0.32959	-0.313965
-55.86	-0.125244	-0.146484	-0.288086	-0.32959	-0.313964
-55.76	-0.104248	-0.134766	-0.273193	-0.317871	-0.302246
-55.66	-0.10498	-0.134766	-0.276367	-0.314697	-0.297608
-55.56	-0.10498	-0.142578	-0.274902	-0.321045	-0.30542
-55.46	-0.100342	-0.166016	-0.269287	-0.321045	-0.310059
-55.36	-0.0932617	-0.161377	-0.26001	-0.318604	-0.306884
-55.26	-0.101807	-0.146484	-0.256836	-0.32959	-0.289795
-55.16	-0.113525	-0.147949	-0.256836	-0.334229	-0.287354
-55.06	-0.120605	-0.150391	-0.253662	-0.341309	-0.29126
-54.96	-0.125244	-0.155029	-0.253662	-0.341309	-0.286622
-54.86	-0.130859	-0.177002	-0.263916	-0.344482	-0.289794
-54.76	-0.116699	-0.173096	-0.256836	-0.332764	-0.290527
-54.66	-0.116699	-0.185547	-0.267822	-0.32251	-0.290528
-54.56	-0.133057	-0.190186	-0.2771	-0.32251	-0.295166
-54.46	-0.140137	-0.197266	-0.281006	-0.337402	-0.302245
-54.36	-0.132324	-0.189453	-0.268555	-0.32959	-0.294434
-54.26	-0.132324	-0.189453	-0.280273	-0.32959	-0.306152
-54.16	-0.140137	-0.189453	-0.280273	-0.32959	-0.306152
-54.06	-0.140137	-0.201172	-0.280273	-0.32959	-0.306152
-53.96	-0.123779	-0.184814	-0.263916	-0.324951	-0.289794
-53.86	-0.116699	-0.177734	-0.256836	-0.317871	-0.282715
-53.76	-0.128418	-0.177734	-0.256836	-0.317871	-0.290527
-53.66	-0.128418	-0.177734	-0.268555	-0.317871	-0.295165
-53.56	-0.117432	-0.177734	-0.260742	-0.310059	-0.294434
-53.46	-0.115967	-0.177734	-0.260742	-0.310059	-0.294434
-53.36	-0.120605	-0.177734	-0.260742	-0.310059	-0.306152
-53.26	-0.125244	-0.189453	-0.260742	-0.321777	-0.306152
-53.16	-0.112061	-0.177734	-0.256836	-0.310059	-0.294434
-53.06	-0.116699	-0.174561	-0.256836	-0.310059	-0.289795
-52.96	-0.116699	-0.169922	-0.252197	-0.310059	-0.282715
-52.86	-0.128418	-0.169922	-0.245117	-0.310059	-0.282715
-52.76	-0.125244	-0.165283	-0.245117	-0.310059	-0.294434
-52.66	-0.120605	-0.170654	-0.249756	-0.317871	-0.294433
-52.56	-0.108887	-0.166016	-0.245117	-0.306152	-0.282715
-52.46	-0.108887	-0.161377	-0.245117	-0.306152	-0.282715
-52.36	-0.108887	-0.166016	-0.252197	-0.306152	-0.282715
-52.26	-0.116699	-0.166016	-0.245117	-0.306152	-0.290527
-52.16	-0.108887	-0.158203	-0.237305	-0.29834	-0.282715
-52.06	-0.108887	-0.158203	-0.237305	-0.29834	-0.282715
-51.96	-0.108887	-0.158203	-0.245117	-0.293701	-0.282715
-51.86	-0.115967	-0.169922	-0.245117	-0.29834	-0.282715
-51.76	-0.108887	-0.169922	-0.245117	-0.29834	-0.282714
-51.66	-0.097168	-0.155029	-0.233398	-0.286621	-0.266357
-51.56	-0.097168	-0.158203	-0.233398	-0.286621	-0.259277
-51.46	-0.097168	-0.158203	-0.230225	-0.286621	-0.270996
-51.36	-0.108887	-0.158203	-0.237305	-0.286621	-0.270996
-51.26	-0.108887	-0.158203	-0.237305	-0.286621	-0.270996
-51.16	-0.108887	-0.153564	-0.237305	-0.294434	-0.278808
-51.06	-0.108887	-0.138672	-0.229492	-0.286621	-0.270996
-50.96	-0.113525	-0.155029	-0.229492	-0.29126	-0.275635
-50.86	-0.120605	-0.162109	-0.237305	-0.29834	-0.282714
-50.76	-0.104248	-0.150391	-0.225586	-0.286621	-0.267822
-50.66	-0.097168	-0.150391	-0.225586	-0.286621	-0.263184
-50.56	-0.108887	-0.158203	-0.237305	-0.29834	-0.274902
-50.46	-0.101074	-0.150391	-0.229492	-0.287354	-0.26709
-50.36	-0.101074	-0.150391	-0.229492	-0.282715	-0.26709
-50.26	-0.101074	-0.150391	-0.229492	-0.282715	-0.26709
-50.16	-0.108887	-0.145752	-0.229492	-0.282715	-0.267089
-50.06	-0.0939941	-0.138672	-0.222412	-0.270996	-0.255371
-49.96	-0.0893555	-0.138672	-0.217773	-0.278809	-0.255371
-49.86	-0.0925293	-0.141846	-0.220947	-0.281982	-0.266358
-49.76	-0.097168	-0.146484	-0.225586	-0.286621	-0.270996
-49.66	-0.097168	-0.134766	-0.225586	-0.274902	-0.259277
-49.56	-0.097168	-0.134766	-0.225586	-0.289795	-0.270996
-49.46	-0.097168	-0.142578	-0.225586	-0.294434	-0.270995
-49.36	-0.0893555	-0.134766	-0.217773	-0.286621	-0.263184
-49.26	-0.0893555	-0.139404	-0.234131	-0.29126	-0.267823
-49.16	-0.097168	-0.146484	-0.241211	-0.295166	-0.274902
-49.06	-0.0854492	-0.146484	-0.237305	-0.278809	-0.270996
-48.96	-0.0854492	-0.146484	-0.237305	-0.286621	-0.270996
-48.86	-0.097168	-0.143311	-0.237305	-0.286621	-0.266357
-48.76	-0.0893555	-0.130859	-0.224854	-0.278809	-0.263184
-48.66	-0.0893555	-0.138672	-0.217773	-0.27417	-0.263184
-48.56	-0.0893555	-0.138672	-0.229492	-0.26709	-0.263184
-48.46	-0.0893555	-0.138672	-0.229492	-0.278809	-0.263184
-48.36	-0.097168	-0.150391	-0.229492	-0.278809	-0.263183
-48.26	-0.0854492	-0.138672	-0.213135	-0.26709	-0.251465
-48.16	-0.0854492	-0.134033	-0.206055	-0.26709	-0.263184
-48.06	-0.0854492	-0.126953	-0.213867	-0.26709	-0.263184
-47.96	-0.097168	-0.126953	-0.213867	-0.275635	-0.263183
-47.86	-0.0893555	-0.119141	-0.206055	-0.263184	-0.255371
-47.76	-0.0925293	-0.134033	-0.209229	-0.266357	-0.266357
-47.66	-0.0854492	-0.126953	-0.198975	-0.259277	-0.259277
-47.56	-0.0822754	-0.126953	-0.206055	-0.259277	-0.259277
-47.46	-0.0893555	-0.131592	-0.206055	-0.262451	-0.259278
-47.36	-0.0939941	-0.131592	-0.210693	-0.264648	-0.263916
-47.26	-0.0932617	-0.130859	-0.209961	-0.266357	-0.271729
-47.16	-0.088623	-0.130859	-0.209961	-0.263916	-0.26709
-47.06	-0.0893555	-0.130859	-0.209961	-0.278076	-0.26709
-46.96	-0.0822754	-0.135498	-0.210693	-0.263916	-0.26001
-46.86	-0.0893555	-0.142578	-0.217773	-0.270996	-0.26709
-46.76	-0.0893555	-0.142578	-0.217773	-0.270996	-0.274902
-46.66	-0.0893555	-0.145752	-0.217773	-0.278809	-0.274902
-46.56	-0.0893555	-0.126953	-0.217773	-0.26709	-0.263184
-46.46	-0.0893555	-0.126953	-0.217773	-0.26709	-0.263183
-46.36	-0.0847168	-0.122314	-0.213135	-0.262451	-0.258545
-46.26	-0.0893555	-0.138672	-0.217773	-0.26709	-0.263184
-46.16	-0.097168	-0.138672	-0.217773	-0.26709	-0.274902
-46.06	-0.097168	-0.135498	-0.217773	-0.26709	-0.274902
-45.96	-0.097168	-0.130859	-0.217773	-0.278809	-0.274901
-45.86	-0.0854492	-0.126953	-0.213135	-0.26709	-0.263184
-45.76	-0.0854492	-0.126953	-0.210693	-0.26709	-0.263184
-45.66	-0.0822754	-0.126953	-0.217773	-0.26709	-0.270995
-45.56	-0.081543	-0.119141	-0.209961	-0.259277	-0.263184
-45.46	-0.081543	-0.130859	-0.209961	-0.259277	-0.263184
-45.36	-0.081543	-0.130859	-0.217773	-0.259277	-0.263184
-45.26	-0.0861816	-0.135498	-0.222412	-0.271729	-0.267822
-45.16	-0.081543	-0.130859	-0.217773	-0.26709	-0.274902
-45.06	-0.0769043	-0.138672	-0.217773	-0.262451	-0.274902
-44.96	-0.0776367	-0.138672	-0.217773	-0.26709	-0.270264
-44.86	-0.0808105	-0.137207	-0.216309	-0.270264	-0.266357
-44.76	-0.0822754	-0.138672	-0.217773	-0.26709	-0.274902
-44.66	-0.0893555	-0.138672	-0.217773	-0.263916	-0.274902
-44.56	-0.101074	-0.138672	-0.217773	-0.259277	-0.274902
-44.46	-0.0893555	-0.126953	-0.213867	-0.255371	-0.263184
-44.36	-0.0847168	-0.122314	-0.213867	-0.255371	-0.270996
-44.26	-0.0776367	-0.126953	-0.213867	-0.255371	-0.270996
-44.16	-0.0776367	-0.126953	-0.210693	-0.255371	-0.270996
-44.06	-0.0776367	-0.126953	-0.206055	-0.26709	-0.270996
-43.96	-0.0776367	-0.123779	-0.209961	-0.259277	-0.263184
-43.86	-0.0776367	-0.119141	-0.209961	-0.259277	-0.263183
-43.76	-0.065918	-0.107422	-0.201416	-0.247559	-0.251465
-43.66	-0.0776367	-0.107422	-0.206055	-0.247559	-0.251465
-43.56	-0.072998	-0.107422	-0.206055	-0.259277	-0.263184
-43.46	-0.0705566	-0.123779	-0.215332	-0.263916	-0.267822
-43.36	-0.065918	-0.119141	-0.206055	-0.259277	-0.263184
-43.26	-0.065918	-0.119141	-0.206055	-0.259277	-0.263184
-43.16	-0.065918	-0.119141	-0.206055	-0.26709	-0.263183
-43.06	-0.0698242	-0.111328	-0.209961	-0.259277	-0.263184
-42.96	-0.0698242	-0.111328	-0.209961	-0.259277	-0.263184
-42.86	-0.0698242	-0.119141	-0.209961	-0.254639	-0.26001
-42.76	-0.0808105	-0.122314	-0.213135	-0.250732	-0.258545
-42.66	-0.0705566	-0.112061	-0.202881	-0.252197	-0.248291
-42.56	-0.065918	-0.107422	-0.198242	-0.247559	-0.243652
-42.46	-0.0627441	-0.119141	-0.206055	-0.247559	-0.255371
-42.36	-0.0612793	-0.122314	-0.209229	-0.250732	-0.258545
-42.26	-0.0698242	-0.119141	-0.206055	-0.247559	-0.255371
-42.16	-0.0698242	-0.119141	-0.217773	-0.247559	-0.255371
-42.06	-0.0698242	-0.119141	-0.217773	-0.247559	-0.255371
-41.96	-0.0581055	-0.107422	-0.206055	-0.243652	-0.243652
-41.86	-0.0581055	-0.107422	-0.206055	-0.243652	-0.243653
-41.76	-0.0627441	-0.119873	-0.210693	-0.248291	-0.248291
-41.66	-0.0698242	-0.126953	-0.217773	-0.26709	-0.263183
-41.56	-0.0698242	-0.119141	-0.22168	-0.259277	-0.255371
-41.46	-0.0698242	-0.119141	-0.22168	-0.259277	-0.25537
-41.36	-0.0581055	-0.119141	-0.209961	-0.247559	-0.243652
-41.26	-0.0698242	-0.119141	-0.209961	-0.247559	-0.255371
-41.16	-0.0698242	-0.119141	-0.217773	-0.247559	-0.255371
-41.06	-0.0698242	-0.119141	-0.217773	-0.255371	-0.255371
-40.96	-0.0581055	-0.107422	-0.206055	-0.243652	-0.243652
-40.86	-0.0581055	-0.119141	-0.206055	-0.243652	-0.243652
-40.76	-0.0581055	-0.119141	-0.206055	-0.243652	-0.246826
-40.66	-0.0581055	-0.111328	-0.198242	-0.247559	-0.243652
-40.56	-0.0581055	-0.111328	-0.209961	-0.247559	-0.243652
-40.46	-0.0581055	-0.119141	-0.209961	-0.247559	-0.24829
-40.36	-0.0581055	-0.107422	-0.198242	-0.23584	-0.235107
-40.26	-0.0581055	-0.107422	-0.198242	-0.23584	-0.239746
-40.16	-0.0581055	-0.107422	-0.198242	-0.23584	-0.239745
-40.06	-0.050293	-0.0996094	-0.198242	-0.239746	-0.231934
-39.96	-0.050293	-0.0996094	-0.198242	-0.239746	-0.243652
-39.86	-0.050293	-0.111328	-0.198242	-0.239746	-0.243652
-39.76	-0.0620117	-0.111328	-0.198242	-0.239746	-0.243652
-39.66	-0.050293	-0.0996094	-0.186523	-0.240479	-0.231934
-39.56	-0.050293	-0.0996094	-0.186523	-0.24292	-0.231934
-39.46	-0.0581055	-0.107422	-0.186523	-0.23584	-0.231934
-39.36	-0.0581055	-0.110596	-0.201416	-0.23584	-0.231934
-39.26	-0.0581055	-0.112061	-0.206055	-0.23584	-0.243652
-39.16	-0.050293	-0.102783	-0.198242	-0.239746	-0.23584
-39.06	-0.050293	-0.104248	-0.198242	-0.244385	-0.23584
-38.96	-0.050293	-0.111328	-0.198242	-0.251465	-0.235839
-38.86	-0.050293	-0.0996094	-0.186523	-0.239746	-0.224121
-38.76	-0.050293	-0.0996094	-0.186523	-0.239746	-0.22876
-38.66	-0.050293	-0.0996094	-0.194336	-0.239746	-0.23584
-38.56	-0.0581055	-0.102783	-0.194336	-0.247559	-0.243652
-38.46	-0.0581055	-0.115234	-0.194336	-0.247559	-0.243652
-38.36	-0.050293	-0.107422	-0.186523	-0.239746	-0.23584
-38.26	-0.050293	-0.107422	-0.198242	-0.239746	-0.235839
-38.16	-0.0385742	-0.107422	-0.186523	-0.228027	-0.227295
-38.06	-0.0385742	-0.107422	-0.191162	-0.228027	-0.231934
-37.96	-0.050293	-0.107422	-0.198242	-0.228027	-0.231934
-37.86	-0.0534668	-0.107422	-0.198242	-0.228027	-0.231933
-37.76	-0.0463867	-0.0957031	-0.186523	-0.228027	-0.220215
-37.66	-0.0463867	-0.0957031	-0.186523	-0.228027	-0.220215
-37.56	-0.0463867	-0.103516	-0.186523	-0.228027	-0.220215
-37.46	-0.0463867	-0.103516	-0.186523	-0.228027	-0.220214
-37.36	-0.041748	-0.0910645	-0.174072	-0.215576	-0.207763
-37.26	-0.0393066	-0.088623	-0.179443	-0.213135	-0.217041
-37.16	-0.041748	-0.0910645	-0.181885	-0.215576	-0.219482
-37.06	-0.0463867	-0.100342	-0.174805	-0.21167	-0.217041
-36.96	-0.034668	-0.0957031	-0.163086	-0.212402	-0.212402
-36.86	-0.034668	-0.0957031	-0.16626	-0.212402	-0.212402
-36.76	-0.034668	-0.0957031	-0.170898	-0.212402	-0.212402
-36.66	-0.0268555	-0.0878906	-0.174805	-0.20459	-0.20459
-36.56	-0.0393066	-0.0925293	-0.179443	-0.209229	-0.217041
-36.46	-0.041748	-0.0949707	-0.181885	-0.21167	-0.219481
-36.36	-0.0275879	-0.0925293	-0.167725	-0.202148	-0.205322
-36.26	-0.0300293	-0.0949707	-0.174805	-0.223389	-0.207763
-36.16	-0.034668	-0.0878906	-0.174805	-0.216309	-0.200684
-36.06	-0.034668	-0.0957031	-0.174805	-0.216309	-0.203857
-35.96	-0.034668	-0.0957031	-0.186523	-0.216309	-0.208495
-35.86	-0.0268555	-0.0878906	-0.178711	-0.208496	-0.200684
-35.76	-0.0314941	-0.0878906	-0.178711	-0.208496	-0.200684
-35.66	-0.0456543	-0.0878906	-0.178711	-0.208496	-0.212401
-35.56	-0.0314941	-0.0761719	-0.174805	-0.20459	-0.200684
-35.46	-0.0385742	-0.0925293	-0.174805	-0.20459	-0.200684
-35.36	-0.0385742	-0.0996094	-0.174805	-0.20459	-0.205322
-35.26	-0.0463867	-0.0996094	-0.174805	-0.20459	-0.212402
-35.16	-0.0432129	-0.0964355	-0.171631	-0.213135	-0.209228
-35.06	-0.0307617	-0.0917969	-0.15918	-0.200684	-0.196777
-34.96	-0.0307617	-0.0917969	-0.170898	-0.200684	-0.196776
-34.86	-0.019043	-0.0800781	-0.15918	-0.188965	-0.192871
-34.76	-0.0307617	-0.0800781	-0.15918	-0.188965	-0.192871
-34.66	-0.0307617	-0.0800781	-0.15918	-0.200684	-0.192871
-34.56	-0.0307617	-0.0800781	-0.15918	-0.200684	-0.192871
-34.46	-0.0307617	-0.0800781	-0.15918	-0.200684	-0.19287
-34.36	-0.0268555	-0.0800781	-0.1521	-0.188965	-0.181152
-34.26	-0.0268555	-0.0800781	-0.15918	-0.188965	-0.181152
-34.16	-0.0268555	-0.0800781	-0.166992	-0.196777	-0.19287
-34.06	-0.019043	-0.0722656	-0.15918	-0.188965	-0.189697
-33.96	-0.0307617	-0.0754395	-0.15918	-0.188965	-0.196777
-33.86	-0.0307617	-0.0800781	-0.15918	-0.188965	-0.196777
-33.76	-0.0307617	-0.0800781	-0.15918	-0.188965	-0.196777
-33.66	-0.026123	-0.083252	-0.16626	-0.200684	-0.192137
-33.56	-0.00732	-0.0644531	-0.150635	-0.188965	-0.17334
-33.46	-0.0151367	-0.0644531	-0.155273	-0.188965	-0.176514
-33.36	-0.0151367	-0.0644531	-0.155273	-0.188965	-0.188965
-33.26	-0.0151367	-0.0761719	-0.155273	-0.188965	-0.188965
-33.16	-0.0268555	-0.0761719	-0.155273	-0.196777	-0.188964
-33.06	-0.019043	-0.0683594	-0.147461	-0.188965	-0.181152
-32.96	-0.019043	-0.0683594	-0.147461	-0.188965	-0.181152
-32.86	-0.019043	-0.072998	-0.147461	-0.188965	-0.181151
-32.76	-0.0119629	-0.0683594	-0.143555	-0.177246	-0.181152
-32.66	-0.0268555	-0.0683594	-0.143555	-0.18042	-0.181152
-32.56	-0.0268555	-0.0761719	-0.143555	-0.196777	-0.181152
-32.46	-0.0236816	-0.072998	-0.140381	-0.193604	-0.177978
-32.36	-0.0222168	-0.074707	-0.138916	-0.192139	-0.176513
-32.26	-0.0275879	-0.072998	-0.148926	-0.185791	-0.170166
-32.16	-0.0229492	-0.0683594	-0.151367	-0.181152	-0.165527
-32.06	-0.0229492	-0.0800781	-0.151367	-0.181152	-0.170166
-31.96	-0.0112305	-0.0683594	-0.139648	-0.169434	-0.177246
-31.86	-0.0144043	-0.0683594	-0.139648	-0.177246	-0.177246
-31.76	-0.0307617	-0.0683594	-0.139648	-0.177246	-0.177246
-31.66	-0.0307617	-0.0683594	-0.139648	-0.177246	-0.185058
-31.56	-0.026123	-0.0637207	-0.13501	-0.172607	-0.180419
-31.46	-0.00732	-0.0566406	-0.116211	-0.153809	-0.161621
-31.36	-0.0151367	-0.0566406	-0.131104	-0.165527	-0.161621
-31.26	-0.0151367	-0.0612793	-0.135742	-0.165527	-0.161621
-31.16	-0.00732	-0.0605469	-0.12793	-0.157715	-0.156982
-31.06	-0.00732	-0.0683594	-0.12793	-0.157715	-0.161621
-30.96	-0.00732	-0.0683594	-0.135742	-0.157715	-0.173339
-30.86	0.00439	-0.0566406	-0.124023	-0.145996	-0.161621
-30.76	-0.0119629	-0.0566406	-0.124023	-0.150635	-0.161621
-30.66	-0.019043	-0.0566406	-0.124023	-0.157715	-0.16162
-30.56	-0.0112305	-0.0488281	-0.116211	-0.157715	-0.153809
-30.46	-0.0112305	-0.0605469	-0.116211	-0.157715	-0.153809
-30.36	-0.0112305	-0.0605469	-0.116211	-0.157715	-0.153809
-30.26	-0.0112305	-0.0605469	-0.116211	-0.157715	-0.153809
-30.16	-0.0222168	-0.0605469	-0.132568	-0.157715	-0.166259
-30.06	-0.0151367	-0.0488281	-0.12793	-0.157715	-0.161621
-29.96	-0.0119629	-0.0456543	-0.124756	-0.157715	-0.158447
-29.86	-0.00732	-0.0441895	-0.120117	-0.157715	-0.153809
-29.76	-0.019043	-0.0566406	-0.120117	-0.157715	-0.153809
-29.66	-0.019043	-0.0566406	-0.120117	-0.157715	-0.153808
-29.56	-0.0112305	-0.0488281	-0.120117	-0.149902	-0.157715
-29.46	-0.0112305	-0.0488281	-0.120117	-0.149902	-0.160889
-29.36	-0.0112305	-0.0488281	-0.120117	-0.149902	-0.165527
-29.26	-0.019043	-0.0605469	-0.120117	-0.161621	-0.165527
-29.16	-0.00732	-0.0488281	-0.111572	-0.149902	-0.153808
-29.06	-0.00269	-0.0441895	-0.111572	-0.149902	-0.153808
-28.96	-0.00732	-0.0371094	-0.116211	-0.149902	-0.153809
-28.86	-0.00732	-0.041748	-0.116211	-0.149902	-0.153809
-28.76	-0.0119629	-0.0488281	-0.12085	-0.149902	-0.161621
-28.66	-0.0112305	-0.0410156	-0.120117	-0.149902	-0.153809
-28.56	-0.0112305	-0.0488281	-0.120117	-0.149902	-0.153809
-28.46	-0.0229492	-0.0488281	-0.12793	-0.149902	-0.156982
-28.36	-0.0229492	-0.0488281	-0.12793	-0.149902	-0.16162
-28.26	-0.0112305	-0.0371094	-0.116211	-0.138184	-0.149902
-28.16	-0.0144043	-0.0371094	-0.116211	-0.141357	-0.161621
-28.06	-0.0268555	-0.0488281	-0.132568	-0.145996	-0.161621
-27.96	-0.0222168	-0.0488281	-0.13501	-0.153076	-0.161621
-27.86	-0.0151367	-0.0488281	-0.12793	-0.145996	-0.161621
-27.76	-0.0151367	-0.0488281	-0.12793	-0.145996	-0.161621
-27.66	-0.00806	-0.0371094	-0.119385	-0.138916	-0.149902
-27.56	-0.0151367	-0.0371094	-0.124023	-0.145996	-0.149902
-27.46	-0.0151367	-0.0402832	-0.124023	-0.145996	-0.149902
-27.36	-0.0236816	-0.041748	-0.128662	-0.142822	-0.151366
-27.26	-0.0112305	-0.0410156	-0.116211	-0.130371	-0.145996
-27.16	-0.0112305	-0.0410156	-0.116211	-0.138184	-0.157715
-27.06	-0.0112305	-0.0410156	-0.116211	-0.138184	-0.157715
-26.96	-0.0112305	-0.0410156	-0.116211	-0.138184	-0.160889
-26.86	-0.0236816	-0.0456543	-0.116211	-0.138184	-0.165527
-26.76	-0.0307617	-0.0527344	-0.132568	-0.154541	-0.165527
-26.66	-0.0307617	-0.0605469	-0.139648	-0.161621	-0.165526
-26.56	-0.0144043	-0.0441895	-0.123291	-0.145264	-0.14917
-26.46	-0.00732	-0.0371094	-0.119385	-0.138184	-0.149902
-26.36	-0.010498	-0.0402832	-0.124023	-0.141357	-0.149902
-26.26	-0.0151367	-0.0449219	-0.124023	-0.145996	-0.154541
-26.16	-0.0268555	-0.0449219	-0.124023	-0.145996	-0.16162
-26.06	-0.0158691	-0.0339355	-0.113037	-0.13501	-0.150635
-25.96	-0.0112305	-0.0292969	-0.108398	-0.138184	-0.145996
-25.86	-0.0112305	-0.0410156	-0.120117	-0.138184	-0.145996
-25.76	-0.0158691	-0.0456543	-0.120117	-0.138184	-0.157715
-25.66	-0.0307617	-0.0527344	-0.120117	-0.138184	-0.157714
-25.56	-0.019043	-0.0410156	-0.116211	-0.126465	-0.145996
-25.46	-0.019043	-0.0488281	-0.116211	-0.126465	-0.145996
-25.36	-0.0222168	-0.0488281	-0.116211	-0.138184	-0.145996
-25.26	-0.0268555	-0.0488281	-0.12085	-0.138184	-0.153808
-25.16	-0.026123	-0.036377	-0.115479	-0.125732	-0.144531
-25.06	-0.019043	-0.0292969	-0.108398	-0.118652	-0.14209
-24.96	-0.019043	-0.0292969	-0.108398	-0.118652	-0.142089
-24.86	-0.00732	-0.0292969	-0.0966797	-0.106934	-0.130371
-24.76	-0.0119629	-0.0292969	-0.108398	-0.118652	-0.130371
-24.66	-0.019043	-0.0292969	-0.108398	-0.118652	-0.130371
-24.56	-0.019043	-0.0292969	-0.108398	-0.118652	-0.14209
-24.46	-0.0268555	-0.0292969	-0.108398	-0.126465	-0.14209
-24.36	-0.0268555	-0.0371094	-0.108398	-0.126465	-0.142089
-24.26	-0.019043	-0.0292969	-0.100586	-0.118652	-0.134277
-24.16	-0.019043	-0.0292969	-0.100586	-0.123291	-0.134277
-24.06	-0.0307617	-0.0292969	-0.111572	-0.130371	-0.138916
-23.96	-0.019043	-0.0324707	-0.104492	-0.118652	-0.134277
-23.86	-0.0222168	-0.0371094	-0.104492	-0.121826	-0.134277
-23.76	-0.0268555	-0.0371094	-0.109131	-0.138184	-0.134277
-23.66	-0.0385742	-0.0371094	-0.116211	-0.138184	-0.134277
-23.56	-0.0354004	-0.0385742	-0.113037	-0.13501	-0.138915
-23.46	-0.0268555	-0.0292969	-0.108398	-0.118652	-0.125732
-23.36	-0.0268555	-0.0371094	-0.108398	-0.123291	-0.130371
-23.26	-0.0268555	-0.0371094	-0.108398	-0.130371	-0.130371
-23.16	-0.0236816	-0.0324707	-0.100586	-0.122559	-0.122559
-23.06	-0.0307617	-0.0488281	-0.10376	-0.130371	-0.127197
-22.96	-0.0424805	-0.0488281	-0.108398	-0.130371	-0.134277
-22.86	-0.0424805	-0.0488281	-0.108398	-0.130371	-0.145996
-22.76	-0.0378418	-0.0488281	-0.116211	-0.128906	-0.141357
-22.66	-0.0222168	-0.0371094	-0.104492	-0.114746	-0.125732
-22.56	-0.034668	-0.0371094	-0.104492	-0.119385	-0.130371
-22.46	-0.034668	-0.0371094	-0.104492	-0.126465	-0.13501
-22.36	-0.0393066	-0.0488281	-0.116211	-0.126465	-0.14209
-22.26	-0.0463867	-0.0488281	-0.12085	-0.126465	-0.14209
-22.16	-0.0385742	-0.0456543	-0.120117	-0.133545	-0.134277
-22.06	-0.050293	-0.0527344	-0.123291	-0.138184	-0.138916
-21.96	-0.050293	-0.0605469	-0.12793	-0.138184	-0.153808
-21.86	-0.0432129	-0.052002	-0.116211	-0.131104	-0.142089
-21.76	-0.0456543	-0.052002	-0.119385	-0.133545	-0.140625
-21.66	-0.041748	-0.0449219	-0.112305	-0.126465	-0.138184
-21.56	-0.0463867	-0.0449219	-0.116943	-0.126465	-0.138183
-21.46	-0.0463867	-0.041748	-0.116211	-0.123291	-0.130371
-21.36	-0.0432129	-0.057373	-0.124756	-0.127197	-0.131836
-21.26	-0.0432129	-0.0527344	-0.120117	-0.122559	-0.134277
-21.16	-0.0385742	-0.0441895	-0.111572	-0.114014	-0.137451
-21.06	-0.050293	-0.0566406	-0.116211	-0.126465	-0.14209
-20.96	-0.0534668	-0.0566406	-0.116211	-0.126465	-0.142089
-20.86	-0.0534668	-0.052002	-0.111572	-0.121826	-0.13745
-20.76	-0.034668	-0.0332031	-0.0927734	-0.107666	-0.118652
-20.66	-0.0393066	-0.0378418	-0.0974121	-0.114746	-0.118652
-20.56	-0.0463867	-0.0371094	-0.0966797	-0.110107	-0.115478
-20.46	-0.0432129	-0.0456543	-0.105225	-0.111572	-0.119384
-20.36	-0.0385742	-0.0410156	-0.100586	-0.106934	-0.114746
-20.26	-0.0385742	-0.0410156	-0.100586	-0.106934	-0.126464
-20.16	-0.041748	-0.0324707	-0.092041	-0.111572	-0.11792
-20.06	-0.0463867	-0.0371094	-0.0966797	-0.118652	-0.122558
-19.96	-0.041748	-0.0371094	-0.092041	-0.114014	-0.117919
-19.86	-0.0268555	-0.0292969	-0.0849609	-0.102295	-0.115479
-19.76	-0.0314941	-0.0371094	-0.0895996	-0.106934	-0.122559
-19.66	-0.0385742	-0.0371094	-0.0966797	-0.106934	-0.122559
-19.56	-0.050293	-0.0402832	-0.0966797	-0.111572	-0.122558
-19.46	-0.0354004	-0.0300293	-0.0817871	-0.10376	-0.112304
-19.36	-0.0307617	-0.0253906	-0.0803223	-0.0991211	-0.114746
-19.26	-0.041748	-0.0300293	-0.0849609	-0.0991211	-0.114746
-19.16	-0.041748	-0.0441895	-0.0803223	-0.102295	-0.110107
-19.06	-0.034668	-0.0371094	-0.0732422	-0.0983887	-0.106201
-18.96	-0.0393066	-0.0371094	-0.0849609	-0.103027	-0.110839
-18.86	-0.0385742	-0.0339355	-0.0817871	-0.0952148	-0.103027
-18.76	-0.050293	-0.0410156	-0.0888672	-0.0998535	-0.114746
-18.66	-0.050293	-0.0410156	-0.0888672	-0.106934	-0.114745
-18.56	-0.0354004	-0.0339355	-0.0739746	-0.092041	-0.104492
-18.46	-0.0354004	-0.0324707	-0.0693359	-0.0991211	-0.106934
-18.36	-0.0424805	-0.0371094	-0.0739746	-0.10376	-0.106934
-18.26	-0.0424805	-0.0371094	-0.0888672	-0.11084	-0.110107
-18.16	-0.034668	-0.0292969	-0.0810547	-0.103027	-0.106933
-18.06	-0.0410156	-0.0410156	-0.0795898	-0.0983887	-0.102295
-17.96	-0.0385742	-0.0410156	-0.0771484	-0.0944824	-0.103026
-17.86	-0.0268555	-0.0292969	-0.0654297	-0.0874023	-0.0913086
-17.76	-0.0268555	-0.0324707	-0.0771484	-0.0874023	-0.0913086
-17.66	-0.0432129	-0.0371094	-0.0771484	-0.0991211	-0.0959464
-17.56	-0.0385742	-0.0253906	-0.0654297	-0.092041	-0.0913084
-17.46	-0.0339355	-0.020752	-0.060791	-0.0944824	-0.0866694
-17.36	-0.0268555	-0.0253906	-0.0537109	-0.0874023	-0.0795892
-17.26	-0.0222168	-0.0175781	-0.0505371	-0.0795898	-0.0717773
-17.16	-0.0268555	-0.0222168	-0.0576172	-0.0795898	-0.0834959
-17.06	-0.0236816	-0.026123	-0.0544434	-0.0795898	-0.0834959
-16.96	-0.019043	-0.0214844	-0.0498047	-0.0795898	-0.0834952
-16.86	-0.0151367	-0.0175781	-0.0412598	-0.0756836	-0.0717773
-16.76	-0.0151367	-0.0175781	-0.0458984	-0.0756836	-0.0717773
-16.66	-0.0151367	-0.020752	-0.0458984	-0.0756836	-0.0717767
-16.56	-0.0119629	-0.0175781	-0.0380859	-0.0678711	-0.0686035
-16.46	-0.0307617	-0.0175781	-0.0458984	-0.0725098	-0.0756832
-16.36	-0.026123	-0.0175781	-0.0412598	-0.0749512	-0.0710444
-16.26	-0.019043	-0.0292969	-0.0341797	-0.0678711	-0.0717773
-16.16	-0.019043	-0.0292969	-0.0388184	-0.0795898	-0.0717764
-16.06	-0.00732	-0.0175781	-0.0341797	-0.0678711	-0.0600586
-15.96	-0.00732	-0.0175781	-0.0341797	-0.0678711	-0.0600586
-15.86	-0.019043	-0.0222168	-0.0341797	-0.0678711	-0.0717773
-15.76	-0.0222168	-0.0292969	-0.0458984	-0.0710449	-0.0717769
-15.66	-0.0158691	-0.026123	-0.0349121	-0.0646973	-0.0607907
-15.56	-0.019043	-0.0214844	-0.0334473	-0.0600586	-0.0593262
-15.46	-0.019043	-0.0246582	-0.0380859	-0.0678711	-0.0639639
-15.36	-0.0119629	-0.0175781	-0.0263672	-0.0561523	-0.0522461
-15.26	-0.019043	-0.0292969	-0.0263672	-0.0561523	-0.0522461
-15.16	-0.019043	-0.0292969	-0.0263672	-0.060791	-0.0522461
-15.06	-0.019043	-0.0339355	-0.0263672	-0.0632324	-0.0522458
-14.96	-0.0229492	-0.0332031	-0.0302734	-0.0529785	-0.0568848
-14.86	-0.0229492	-0.0332031	-0.0349121	-0.0600586	-0.0639648
-14.76	-0.0307617	-0.0332031	-0.0419922	-0.0600586	-0.0639642
-14.66	-0.0144043	-0.0246582	-0.0256348	-0.0437012	-0.0476069
-14.56	-0.0119629	-0.020752	-0.0263672	-0.0366211	-0.0405273
-14.46	-0.019043	-0.0253906	-0.0310059	-0.0412598	-0.0568848
-14.36	-0.019043	-0.0253906	-0.0380859	-0.0483398	-0.0639639
-14.26	-0.019043	-0.0136719	-0.029541	-0.0515137	-0.0522461
-14.16	-0.0222168	-0.0183105	-0.0341797	-0.0444336	-0.0554193
-14.06	-0.019043	-0.0292969	-0.0263672	-0.0483398	-0.0522461
-13.96	-0.019043	-0.0292969	-0.0263672	-0.0483398	-0.0522461
-13.86	-0.019043	-0.0292969	-0.0263672	-0.0529785	-0.0522461
-13.76	-0.0268555	-0.0324707	-0.0263672	-0.0600586	-0.0639644
-13.66	-0.0151367	-0.0253906	-0.0310059	-0.0483398	-0.0568845
-13.56	-0.0119629	-0.0268555	-0.0349121	-0.0483398	-0.0607908
-13.46	-0.019043	-0.0292969	-0.0302734	-0.0483398	-0.0561523
-13.36	-0.019043	-0.0410156	-0.0334473	-0.0483398	-0.0561523
-13.26	-0.019043	-0.0410156	-0.0380859	-0.0561523	-0.056152
-13.16	-0.0158691	-0.036377	-0.0302734	-0.0483398	-0.0561523
-13.06	-0.0229492	-0.0410156	-0.0380859	-0.0483398	-0.0561522
-12.96	-0.026123	-0.036377	-0.0334473	-0.0437012	-0.0515122
-12.86	-0.00732	-0.0253906	-0.0146484	-0.0249023	-0.0327148
-12.76	-0.010498	-0.0300293	-0.0146484	-0.0249023	-0.0327148
-12.66	-0.0268555	-0.0371094	-0.0146484	-0.0366211	-0.0327148
-12.56	-0.0268555	-0.0371094	-0.0192871	-0.0366211	-0.0327144
-12.46	-0.0158691	-0.026123	-0.0153809	-0.0256348	-0.0217282
-12.36	-0.0112305	-0.0214844	-0.0107422	-0.0209961	-0.0202637
-12.26	-0.0112305	-0.0214844	-0.0224609	-0.0256348	-0.0249019
-12.16	0.000488	-0.00977	-0.0107422	-0.0209961	-0.0249023
-12.06	-0.0112305	-0.00977	-0.0107422	-0.0209961	-0.0249023
-11.96	-0.0112305	-0.00977	-0.0107422	-0.0209961	-0.024902
-11.86	-0.00659	-0.0168457	-0.0061	-0.0163574	-0.0202631
-11.76	-0.00732	-0.00977	0.000977	-0.00928	-0.0131831
-11.66	0.00439	0.00195	0.0126953	0.00244	-0.00146
-11.56	0.00439	0.00195	0.00488	0.00244	-0.00146
-11.46	0.00439	0.00195	0.00488	-0.00537	-0.00146
-11.36	0.012207	0.00977	0.0126953	0.00244	0.00635
-11.26	0.012207	0.00195	0.0126953	0.00244	-0.00146
-11.16	0.012207	0.00195	0.0126953	0.00244	-0.00146
-11.06	0.000488	0.00195	0.0126953	0.00244	-0.00146
-10.96	0.000488	0.00195	0.000977	0.00244	-0.00146
-10.86	0.012207	0.0136719	0.0126953	0.00244	0.0102539
-10.76	0.012207	0.0136719	0.0126953	0.00244	0.0102539
-10.66	0.012207	0.0136719	0.0126953	0.00244	-0.00146
-10.56	0.00439	0.0136719	0.0126953	0.00244	-0.00146
-10.46	0.0168457	0.0214844	0.0251465	0.0148926	0.0109869
-10.36	0.0239258	0.00977	0.0322266	0.0187988	0.0180664
-10.26	0.0239258	0.00977	0.0322266	0.0141602	0.0180664
-10.16	0.0239258	0.00977	0.0212402	0.017334	0.0180664
-10.06	0.0239258	0.00977	0.0166016	0.0187988	0.0180669
-9.96001	0.0239258	0.0214844	0.0283203	0.0141602	0.0219727
-9.86001	0.0239258	0.0214844	0.0283203	0.0141602	0.0219727
-9.76001	0.0239258	0.0214844	0.0283203	0.0141602	0.0219727
-9.66001	0.0239258	0.0136719	0.0166016	0.0141602	0.0219727
-9.56001	0.0161133	0.0136719	0.0166016	0.0141602	0.021973
-9.46001	0.0239258	0.0214844	0.0244141	0.0219727	0.0297852
-9.36001	0.0239258	0.0214844	0.0244141	0.0141602	0.0297852
-9.26001	0.0239258	0.0214844	0.0197754	0.0141602	0.0180664
-9.16001	0.012207	0.0214844	0.0126953	0.0141602	0.0180673
-9.06001	0.0239258	0.0214844	0.0244141	0.0258789	0.0297852
-8.96001	0.0239258	0.0214844	0.0244141	0.0258789	0.0297852
-8.86001	0.0239258	0.0214844	0.0126953	0.0258789	0.0251465
-8.76001	0.0161133	0.0183105	0.0126953	0.0258789	0.0180664
-8.66001	0.0114746	0.0136719	0.0126953	0.0258789	0.0180664
-8.56001	0.00439	0.0136719	0.0126953	0.0141602	0.0180664
-8.46001	0.00439	0.0136719	0.0126953	0.0141602	0.0180664
-8.36001	0.00439	0.00586	0.00171	0.0141602	0.0180672
-8.26001	0.00366	0.0168457	0.00806	0.0205078	0.0290529
-8.16001	0.0083	0.0214844	0.0126953	0.0180664	0.0305176
-8.06001	0.0083	0.0214844	0.0126953	0.0180664	0.0141602
-7.96001	0.0083	0.0168457	0.0126953	0.0180664	0.0141611
-7.86001	0.0200195	0.0214844	0.0244141	0.0297852	0.0258789
-7.76001	0.0200195	0.00977	0.0197754	0.0297852	0.0258789
-7.66001	0.0083	0.00977	0.0126953	0.0297852	0.0258789
-7.56001	0.0083	0.00977	0.000977	0.0219727	0.0258789
-7.46001	0.00513	0.00977	0.000977	0.0219727	0.0258789
-7.36001	0.000488	0.00659	0.000977	0.0219727	0.0212411
-7.26001	0.00439	0.0136719	0.0126953	0.0336914	0.0258789
-7.16001	0.00439	0.0136719	0.00488	0.0336914	0.0180668
-7.06001	0.00439	0.00659	0.00488	0.0383301	0.0227053
-6.96001	0.00439	0.0136719	0.00488	0.0422363	0.0297858
-6.86001	0.000488	0.0168457	0.0126953	0.0336914	0.0375977
-6.76001	0.000488	0.00977	0.0126953	0.0290527	0.0344238
-6.66001	0.000488	0.00195	-0.0022	0.0219727	0.0297852
-6.56001	-0.00732	0.00195	-0.00684	0.0219727	0.0297856
-6.46001	0.00439	0.0136719	0.00488	0.0336914	0.0297852
-6.36001	0.00122	0.0136719	0.00488	0.0258789	0.0297854
-6.26001	-0.000244	0.0136719	0.00806	0.0290527	0.0329592
-6.16001	-0.00732	0.0136719	0.0126953	0.0336914	0.0375977
-6.06001	-0.00732	0.0136719	0.0126953	0.0290527	0.0297855
-5.96001	0.000488	0.00977	0.0205078	0.0297852	0.0407715
-5.86001	0.000488	0.00977	0.0126953	0.0297852	0.0258789
-5.76001	-0.00732	0.00977	0.00806	0.0297852	0.0258789
-5.66	-0.00732	0.00977	0.000977	0.0180664	0.0258789
-5.56001	0.00439	0.0136719	0.000977	0.0266113	0.0375977
-5.46001	-0.00732	0.0136719	0.000977	0.0219727	0.0375977
-5.36001	-0.00732	0.0136719	0.000977	0.0219727	0.0375977
-5.26001	-0.00732	0.0136719	0.000977	0.0219727	0.0375983
-5.16	0.000488	0.0214844	0.00879	0.0297852	0.0454102
-5.06001	0.000488	0.0214844	0.000977	0.0297852	0.0407715
-4.96001	-0.0112305	0.0214844	0.000977	0.0297852	0.0336914
-4.86001	-0.0112305	0.0214844	-0.0022	0.0251465	0.0336923
-4.76001	0.000488	0.0285645	0.00488	0.0180664	0.0336914
-4.66	-0.0119629	0.00977	0.00488	0.0180664	0.0336914
-4.56001	-0.019043	0.00977	-0.00684	0.0180664	0.0305176
-4.46001	-0.019043	0.00977	-0.00684	0.0180664	0.0258795
-4.36001	-0.0112305	0.0175781	0.000977	0.0180664	0.0336918
-4.26001	-0.00659	0.0222168	0.00562	0.0195313	0.0383306
-4.16	0.000488	0.0214844	0.0126953	0.0219727	0.0454102
-4.06001	-0.0112305	0.0214844	0.0126953	0.0219727	0.0407715
-3.96001	-0.0112305	0.0214844	0.000977	0.017334	0.0336914
-3.86001	-0.0112305	0.0183105	-0.00366	0.0102539	0.0305185
-3.76001	-0.0119629	0.0136719	0.000977	0.0219727	0.0375979
-3.66	-0.0158691	0.012207	-0.00366	0.0251465	0.0407715
-3.56001	-0.0144043	0.00977	-0.0022	0.0266113	0.0407715
-3.46001	-0.019043	0.00977	-0.00684	0.0219727	0.0336914
-3.36001	-0.0236816	0.00977	-0.0114746	0.017334	0.0258802
-3.26001	-0.0175781	0.0214844	-0.0022	0.0266113	0.0422369
-3.16	-0.0268555	0.0214844	0.00488	0.0336914	0.0461426
-3.06001	-0.0222168	0.0229492	0.00635	0.0266113	0.0415044
-2.96001	-0.0151367	0.0253906	0.00879	0.0305176	0.0415039
-2.86001	-0.0275879	0.0129395	-0.00757	0.0258789	0.0415047
-2.76001	-0.0268555	0.0136719	-0.00366	0.0244141	0.0478519
-2.66	-0.0432129	0.0136719	-0.00366	0.0219727	0.0422363
-2.56001	-0.0488281	0.0136719	-0.00928	0.0187988	0.0422371
-2.46001	-0.0556641	0.0168457	-0.0083	0.017334	0.0478528
-2.36001	-0.0510254	0.0300293	0.000977	0.0290527	0.0539554
-2.26001	-0.0683594	0.020752	0.00244	0.0234375	0.0493175
-2.16	-0.0581055	0.00659	0.00806	0.0290527	0.0539551
-2.06001	-0.0510254	0.00903	0.0126953	0.0244141	0.059571
-1.96001	-0.0581055	0.00195	0.00806	0.00708	0.053956
-1.86001	-0.0566406	0.00659	0.00562	-0.00781	0.0344252
-1.76001	-0.0478516	0.0214844	0.000977	0.00562	0.0407727
-1.66	-0.0339355	0.0285645	0.0126953	0.017334	0.0571289
-1.56001	-0.0385742	0.0292969	0.0126953	0.0180664	0.0649418
-1.46001	-0.050293	0.00659	0.0126953	0.0148926	0.0649434
-1.36001	-0.0432129	-0.010498	0.0166016	0.0258789	0.0759292
-1.26001	-0.0307617	-0.00977	-0.00366	0.00879	0.0524904
-1.16	0	0	0	0	0
-1.06001	0	0	0	0	0
-0.960007	0	0	0	0	0
-0.860008	0	0	0	0	0
-0.76001	0	0	0	0	0
-0.660004	0	0	0	0	0
-0.560005	0	0	0	0	0
-0.460007	0	0	0	0	0
-0.360008	0	0	0	0	0
-0.26001	0	0	0	0	0
-0.160004	0	0	0	0	0
-0.0600052	0	0	0	0	0
0.0399933	5.896	4.586	4.247	4.948	7.874
0.139992	5.89684	4.59274	4.26048	4.97495	7.92783
0.23999	5.89769	4.59948	4.27395	5.00182	7.98134
0.339996	5.89853	4.60621	4.28738	5.0286	8.03454
0.439995	5.89937	4.61293	4.30079	5.0553	8.08744
0.539993	5.90021	4.61965	4.31418	5.08191	8.14001
0.639992	5.90105	4.62635	4.32754	5.10844	8.19228
0.73999	5.90189	4.63305	4.34088	5.13488	8.24425
0.839996	5.90273	4.63974	4.3542	5.16124	8.2959
0.939995	5.90357	4.64643	4.36749	5.18752	8.34726
1.03999	5.90441	4.6531	4.38076	5.21371	8.39832
1.13999	5.90525	4.65977	4.394	5.23982	8.44907
1.23999	5.90609	4.66643	4.40722	5.26585	8.49952
1.34	5.90693	4.67309	4.42041	5.29179	8.54968
1.43999	5.90777	4.67973	4.43358	5.31766	8.59955
1.53999	5.9086	4.68637	4.44673	5.34344	8.64913
1.63999	5.90944	4.693	4.45985	5.36914	8.69841
1.73999	5.91028	4.69962	4.47295	5.39475	8.7474
1.84	5.91111	4.70624	4.48602	5.42029	8.7961
1.93999	5.91195	4.71285	4.49908	5.44575	8.84453
2.03999	5.91278	4.71945	4.5121	5.47112	8.89266
2.13999	5.91362	4.72604	4.52511	5.49642	8.94052
2.23999	5.91445	4.73263	4.53809	5.52163	8.98809
2.34	5.91528	4.73921	4.55104	5.54677	9.03538
2.43999	5.91612	4.74578	4.56398	5.57182	9.0824
2.53999	5.91695	4.75234	4.57689	5.5968	9.12914
2.63999	5.91778	4.75889	4.58977	5.62169	9.1756
2.73999	5.91861	4.76544	4.60264	5.64651	9.22179
2.84	5.91944	4.77198	4.61548	5.67125	9.26772
2.93999	5.92027	4.77852	4.62829	5.69591	9.31337
3.03999	5.9211	4.78504	4.64109	5.72049	9.35875
3.13999	5.92193	4.79156	4.65385	5.745	9.40387
3.23999	5.92276	4.79807	4.6666	5.76943	9.44873
3.34	5.92359	4.80458	4.67933	5.79378	9.49331
3.43999	5.92442	4.81107	4.69203	5.81805	9.53765
3.53999	5.92525	4.81756	4.7047	5.84224	9.58171
3.63999	5.92607	4.82404	4.71736	5.86636	9.62552
3.73999	5.9269	4.83051	4.72999	5.8904	9.66907
3.84	5.92773	4.83698	4.7426	5.91437	9.71237
3.93999	5.92855	4.84344	4.75518	5.93826	9.75542
4.03999	5.92938	4.84989	4.76775	5.96208	9.79821
4.13999	5.93021	4.85634	4.78029	5.98582	9.84075
4.23999	5.93103	4.86277	4.7928	6.00948	9.88303
4.34	5.93185	4.8692	4.8053	6.03307	9.92508
4.43999	5.93268	4.87563	4.81777	6.05659	9.96687
4.53999	5.9335	4.88204	4.83022	6.08003	10.0084
4.63999	5.93432	4.88845	4.84264	6.10339	10.0497
4.73999	5.93515	4.89485	4.85505	6.12668	10.0908
4.84	5.93597	4.90124	4.86743	6.1499	10.1316
4.93999	5.93679	4.90763	4.87979	6.17305	10.1722
5.03999	5.93761	4.91401	4.89213	6.19612	10.2125
5.13999	5.93843	4.92038	4.90444	6.21911	10.2526
5.23999	5.93925	4.92675	4.91673	6.24204	10.2925
5.34	5.94007	4.9331	4.929	6.26489	10.3322
5.43999	5.94089	4.93945	4.94125	6.28767	10.3716
5.53999	5.94171	4.94579	4.95347	6.31038	10.4107
5.63999	5.94253	4.95213	4.96568	6.33302	10.4497
5.73999	5.94335	4.95846	4.97786	6.35558	10.4884
5.84	5.94417	4.96478	4.99002	6.37807	10.5269
5.93999	5.94498	4.97109	5.00215	6.4005	10.5652
6.03999	5.9458	4.9774	5.01427	6.42285	10.6032
6.13999	5.94662	4.9837	5.02636	6.44512	10.641
6.23999	5.94743	4.98999	5.03843	6.46733	10.6786
6.34	5.94825	4.99628	5.05048	6.48947	10.716
6.43999	5.94906	5.00255	5.06251	6.51154	10.7531
6.53999	5.94988	5.00883	5.07451	6.53354	10.7901
6.63999	5.95069	5.01509	5.08649	6.55547	10.8268
6.73999	5.9515	5.02135	5.09845	6.57733	10.8633
6.84	5.95232	5.0276	5.11039	6.59912	10.8996
6.93999	5.95313	5.03384	5.12231	6.62084	10.9357
7.03999	5.95394	5.04007	5.13421	6.64249	10.9715
7.13999	5.95475	5.0463	5.14608	6.66408	11.0072
7.23999	5.95557	5.05252	5.15794	6.68559	11.0426
7.34	5.95638	5.05874	5.16977	6.70704	11.0779
7.43999	5.95719	5.06494	5.18158	6.72842	11.1129
7.53999	5.958	5.07114	5.19337	6.74973	11.1477
7.63999	5.95881	5.07734	5.20513	6.77098	11.1823
7.73999	5.95962	5.08352	5.21688	6.79215	11.2167
7.84	5.96042	5.0897	5.22861	6.81326	11.251
7.93999	5.96123	5.09587	5.24031	6.83431	11.285
8.03999	5.96204	5.10204	5.25199	6.85528	11.3188
8.13999	5.96285	5.10819	5.26365	6.87619	11.3524
8.23999	5.96365	5.11434	5.27529	6.89703	11.3858
8.34	5.96446	5.12049	5.28691	6.91781	11.419
8.43999	5.96527	5.12662	5.29851	6.93852	11.4521
8.53999	5.96607	5.13275	5.31008	6.95917	11.4849
8.63999	5.96688	5.13888	5.32164	6.97975	11.5176
8.73999	5.96768	5.14499	5.33317	7.00027	11.55
8.84	5.96849	5.1511	5.34469	7.02072	11.5823
8.93999	5.96929	5.1572	5.35618	7.0411	11.6143
9.03999	5.97009	5.1633	5.36765	7.06142	11.6462
9.13999	5.9709	5.16939	5.3791	7.08168	11.6779
9.23999	5.9717	5.17547	5.39053	7.10187	11.7094
9.34	5.9725	5.18154	5.40194	7.122	11.7407
9.43999	5.9733	5.18761	5.41333	7.14207	11.7719
9.53999	5.97411	5.19367	5.4247	7.16207	11.8028
9.63999	5.97491	5.19972	5.43605	7.18201	11.8336
9.73999	5.97571	5.20577	5.44737	7.20188	11.8642
9.84	5.97651	5.21181	5.45868	7.22169	11.8946
9.93999	5.97731	5.21784	5.46997	7.24144	11.9249
10.04	5.97811	5.22387	5.48123	7.26113	11.9549
10.14	5.9789	5.22989	5.49248	7.28075	11.9848
10.24	5.9797	5.2359	5.5037	7.30031	12.0145
10.34	5.9805	5.2419	5.51491	7.31981	12.044
10.44	5.9813	5.2479	5.52609	7.33925	12.0734
10.54	5.98209	5.25389	5.53725	7.35863	12.1026
10.64	5.98289	5.25988	5.5484	7.37794	12.1316
10.74	5.98369	5.26586	5.55952	7.3972	12.1605
10.84	5.98448	5.27183	5.57062	7.41639	12.1891
10.94	5.98528	5.27779	5.5817	7.43552	12.2176
11.04	5.98607	5.28375	5.59277	7.45459	12.246
11.14	5.98687	5.2897	5.60381	7.47361	12.2742
11.24	5.98766	5.29564	5.61483	7.49256	12.3022
11.34	5.98845	5.30158	5.62583	7.51145	12.33
11.44	5.98925	5.30751	5.63682	7.53028	12.3577
11.54	5.99004	5.31344	5.64778	7.54905	12.3852
11.64	5.99083	5.31935	5.65872	7.56776	12.4126
11.74	5.99162	5.32526	5.66964	7.58641	12.4398
11.84	5.99241	5.33117	5.68055	7.60501	12.4668
11.94	5.99321	5.33706	5.69143	7.62354	12.4937
12.04	5.994	5.34295	5.70229	7.64202	12.5204
12.14	5.99479	5.34884	5.71314	7.66044	12.547
12.24	5.99558	5.35471	5.72396	7.6788	12.5734
12.34	5.99636	5.36058	5.73477	7.6971	12.5996
12.44	5.99715	5.36645	5.74555	7.71534	12.6257
12.54	5.99794	5.3723	5.75632	7.73352	12.6517
12.64	5.99873	5.37815	5.76706	7.75165	12.6775
12.74	5.99952	5.384	5.77779	7.76972	12.7031
12.84	6.0003	5.38983	5.78849	7.78774	12.7286
12.94	6.00109	5.39566	5.79918	7.80569	12.754
13.04	6.00188	5.40149	5.80985	7.82359	12.7792
13.14	6.00266	5.4073	5.8205	7.84143	12.8042
13.24	6.00345	5.41311	5.83113	7.85922	12.8291
13.34	6.00423	5.41892	5.84174	7.87695	12.8539
13.44	6.00502	5.42472	5.85233	7.89462	12.8785
13.54	6.0058	5.43051	5.8629	7.91224	12.9029
13.64	6.00658	5.43629	5.87345	7.9298	12.9272
13.74	6.00737	5.44207	5.88398	7.9473	12.9514
13.84	6.00815	5.44784	5.8945	7.96476	12.9755
13.94	6.00893	5.4536	5.90499	7.98215	12.9994
14.04	6.00971	5.45936	5.91547	7.99949	13.0231
14.14	6.0105	5.46511	5.92592	8.01677	13.0467
14.24	6.01128	5.47085	5.93636	8.034	13.0702
14.34	6.01206	5.47659	5.94678	8.05118	13.0935
14.44	6.01284	5.48232	5.95718	8.0683	13.1167
14.54	6.01362	5.48805	5.96756	8.08537	13.1398
14.64	6.0144	5.49377	5.97792	8.10238	13.1627
14.74	6.01518	5.49948	5.98827	8.11934	13.1855
14.84	6.01595	5.50518	5.99859	8.13625	13.2082
14.94	6.01673	5.51088	6.0089	8.1531	13.2307
15.04	6.01751	5.51658	6.01918	8.1699	13.2531
15.14	6.01829	5.52226	6.02945	8.18664	13.2754
15.24	6.01906	5.52794	6.0397	8.20333	13.2975
15.34	6.01984	5.53361	6.04993	8.21997	13.3195
15.44	6.02062	5.53928	6.06015	8.23656	13.3414
15.54	6.02139	5.54494	6.07034	8.25309	13.3631
15.64	6.02217	5.55059	6.08052	8.26957	13.3848
15.74	6.02294	5.55624	6.09067	8.286	13.4063
15.84	6.02371	5.56188	6.10081	8.30238	13.4276
15.94	6.02449	5.56752	6.11093	8.31871	13.4489
16.04	6.02526	5.57314	6.12103	8.33498	13.47
16.14	6.02603	5.57877	6.13112	8.3512	13.491
16.24	6.02681	5.58438	6.14118	8.36737	13.5118
16.34	6.02758	5.58999	6.15123	8.38349	13.5326
16.44	6.02835	5.59559	6.16126	8.39956	13.5532
16.54	6.02912	5.60119	6.17127	8.41558	13.5737
16.64	6.02989	5.60678	6.18126	8.43155	13.5941
16.74	6.03066	5.61236	6.19124	8.44746	13.6144
16.84	6.03143	5.61794	6.20119	8.46333	13.6345
16.94	6.0322	5.62351	6.21113	8.47914	13.6545
17.04	6.03297	5.62907	6.22105	8.49491	13.6745
17.14	6.03374	5.63463	6.23095	8.51062	13.6942
17.24	6.03451	5.64018	6.24084	8.52629	13.7139
17.34	6.03528	5.64573	6.2507	8.54191	13.7335
17.44	6.03605	5.65127	6.26055	8.55747	13.7529
17.54	6.03681	5.6568	6.27038	8.57299	13.7723
17.64	6.03758	5.66232	6.28019	8.58846	13.7915
17.74	6.03834	5.66784	6.28999	8.60388	13.8106
17.84	6.03911	5.67336	6.29977	8.61925	13.8296
17.94	6.03988	5.67887	6.30953	8.63457	13.8485
18.04	6.04064	5.68437	6.31927	8.64984	13.8672
18.14	6.04141	5.68986	6.32899	8.66507	13.8859
18.24	6.04217	5.69535	6.3387	8.68024	13.9044
18.34	6.04293	5.70083	6.34839	8.69537	13.9229
18.44	6.0437	5.70631	6.35806	8.71045	13.9412
18.54	6.04446	5.71178	6.36771	8.72549	13.9595
18.64	6.04522	5.71724	6.37734	8.74047	13.9776
18.74	6.04598	5.7227	6.38696	8.75541	13.9956
18.84	6.04675	5.72815	6.39656	8.7703	14.0135
18.94	6.04751	5.7336	6.40615	8.78514	14.0313
19.04	6.04827	5.73904	6.41571	8.79994	14.049
19.14	6.04903	5.74447	6.42526	8.81469	14.0666
19.24	6.04979	5.7499	6.43479	8.82939	14.0841
19.34	6.05055	5.75532	6.44431	8.84405	14.1015
19.44	6.05131	5.76073	6.4538	8.85865	14.1188
19.54	6.05207	5.76614	6.46328	8.87322	14.1359
19.64	6.05282	5.77154	6.47275	8.88773	14.153
19.74	6.05358	5.77694	6.48219	8.90221	14.17
19.84	6.05434	5.78233	6.49162	8.91663	14.1869
19.94	6.0551	5.78771	6.50103	8.93101	14.2037
20.04	6.05585	5.79309	6.51042	8.94534	14.2204
20.14	6.05661	5.79846	6.5198	8.95963	14.237
20.24	6.05737	5.80382	6.52916	8.97388	14.2535
20.34	6.05812	5.80918	6.5385	8.98807	14.2698
20.44	6.05888	5.81453	6.54783	9.00223	14.2861
20.54	6.05963	5.81988	6.55714	9.01634	14.3023
20.64	6.06038	5.82522	6.56643	9.0304	14.3185
20.74	6.06114	5.83056	6.57571	9.04442	14.3345
20.84	6.06189	5.83589	6.58496	9.05839	14.3504
20.94	6.06265	5.84121	6.59421	9.07232	14.3662
21.04	6.0634	5.84652	6.60343	9.08621	14.3819
21.14	6.06415	5.85183	6.61264	9.10005	14.3976
21.24	6.0649	5.85714	6.62183	9.11385	14.4131
21.34	6.06565	5.86244	6.631	9.12761	14.4286
21.44	6.0664	5.86773	6.64016	9.14132	14.444
21.54	6.06715	5.87302	6.6493	9.15498	14.4592
21.64	6.0679	5.8783	6.65843	9.16861	14.4744
21.74	6.06865	5.88357	6.66754	9.18219	14.4895
21.84	6.0694	5.88884	6.67663	9.19573	14.5045
21.94	6.07015	5.8941	6.6857	9.20922	14.5195
22.04	6.0709	5.89936	6.69476	9.22268	14.5343
22.14	6.07165	5.90461	6.7038	9.23609	14.549
22.24	6.0724	5.90985	6.71283	9.24945	14.5637
22.34	6.07314	5.91509	6.72184	9.26278	14.5783
22.44	6.07389	5.92032	6.73083	9.27606	14.5928
22.54	6.07464	5.92555	6.73981	9.2893	14.6072
22.64	6.07538	5.93077	6.74877	9.3025	14.6215
22.74	6.07613	5.93598	6.75771	9.31566	14.6357
22.84	6.07687	5.94119	6.76664	9.32877	14.6499
22.94	6.07762	5.9464	6.77555	9.34185	14.6639
23.04	6.07836	5.95159	6.78445	9.35488	14.6779
23.14	6.07911	5.95678	6.79333	9.36787	14.6918
23.24	6.07985	5.96197	6.80219	9.38082	14.7057
23.34	6.08059	5.96715	6.81104	9.39373	14.7194
23.44	6.08134	5.97232	6.81987	9.4066	14.7331
23.54	6.08208	5.97749	6.82869	9.41943	14.7466
23.64	6.08282	5.98265	6.83748	9.43221	14.7601
23.74	6.08356	5.9878	6.84627	9.44496	14.7736
23.84	6.0843	5.99295	6.85504	9.45766	14.7869
23.94	6.08504	5.9981	6.86379	9.47033	14.8002
24.04	6.08579	6.00324	6.87252	9.48296	14.8134
24.14	6.08653	6.00837	6.88124	9.49554	14.8265
24.24	6.08726	6.01349	6.88994	9.50809	14.8395
24.34	6.088	6.01861	6.89863	9.52059	14.8525
24.44	6.08874	6.02373	6.90731	9.53306	14.8653
24.54	6.08948	6.02884	6.91596	9.54548	14.8781
24.64	6.09022	6.03394	6.9246	9.55787	14.8909
24.74	6.09096	6.03904	6.93323	9.57022	14.9035
24.84	6.09169	6.04413	6.94184	9.58253	14.9161
24.94	6.09243	6.04921	6.95043	9.5948	14.9286
25.04	6.09317	6.05429	6.95901	9.60703	14.941
25.14	6.0939	6.05937	6.96757	9.61922	14.9534
25.24	6.09464	6.06444	6.97612	9.63138	14.9657
25.34	6.09537	6.0695	6.98465	9.64349	14.9779
25.44	6.09611	6.07456	6.99317	9.65557	14.99
25.54	6.09684	6.07961	7.00167	9.66761	15.0021
25.64	6.09758	6.08465	7.01015	9.67961	15.0141
25.74	6.09831	6.08969	7.01862	9.69157	15.0261
25.84	6.09904	6.09472	7.02708	9.70349	15.0379
25.94	6.09978	6.09975	7.03551	9.71538	15.0497
26.04	6.10051	6.10478	7.04394	9.72723	15.0614
26.14	6.10124	6.10979	7.05235	9.73904	15.0731
26.24	6.10197	6.1148	7.06074	9.75082	15.0847
26.34	6.1027	6.11981	7.06912	9.76255	15.0962
26.44	6.10343	6.12481	7.07748	9.77425	15.1076
26.54	6.10416	6.1298	7.08583	9.78591	15.119
26.64	6.10489	6.13479	7.09416	9.79754	15.1303
26.74	6.10562	6.13977	7.10248	9.80913	15.1416
26.84	6.10635	6.14475	7.11078	9.82068	15.1528
26.94	6.10708	6.14972	7.11907	9.8322	15.1639
27.04	6.10781	6.15468	7.12734	9.84368	15.1749
27.14	6.10854	6.15964	7.1356	9.85512	15.1859
27.24	6.10926	6.1646	7.14384	9.86652	15.1968
27.34	6.10999	6.16955	7.15207	9.8779	15.2077
27.44	6.11072	6.17449	7.16028	9.88923	15.2185
27.54	6.11144	6.17943	7.16847	9.90053	15.2292
27.64	6.11217	6.18436	7.17666	9.91179	15.2399
27.74	6.1129	6.18928	7.18482	9.92302	15.2505
27.84	6.11362	6.1942	7.19298	9.93421	15.2611
27.94	6.11435	6.19912	7.20112	9.94536	15.2715
28.04	6.11507	6.20403	7.20924	9.95648	15.282
28.14	6.11579	6.20893	7.21735	9.96757	15.2923
28.24	6.11652	6.21383	7.22544	9.97862	15.3026
28.34	6.11724	6.21872	7.23352	9.98964	15.3129
28.44	6.11796	6.22361	7.24158	10.0006	15.323
28.54	6.11869	6.22849	7.24963	10.0116	15.3331
28.64	6.11941	6.23337	7.25767	10.0225	15.3432
28.74	6.12013	6.23824	7.26569	10.0333	15.3532
28.84	6.12085	6.2431	7.27369	10.0442	15.3631
28.94	6.12157	6.24796	7.28169	10.055	15.373
29.04	6.12229	6.25281	7.28966	10.0658	15.3829
29.14	6.12301	6.25766	7.29763	10.0765	15.3926
29.24	6.12373	6.2625	7.30557	10.0872	15.4023
29.34	6.12445	6.26734	7.31351	10.0979	15.412
29.44	6.12517	6.27217	7.32143	10.1085	15.4216
29.54	6.12589	6.277	7.32933	10.1191	15.4311
29.64	6.12661	6.28182	7.33722	10.1297	15.4406
29.74	6.12733	6.28663	7.3451	10.1402	15.45
29.84	6.12804	6.29144	7.35296	10.1507	15.4594
29.94	6.12876	6.29625	7.36081	10.1612	15.4687
30.04	6.12948	6.30105	7.36864	10.1716	15.478
30.14	6.13019	6.30584	7.37646	10.182	15.4872
30.24	6.13091	6.31063	7.38426	10.1924	15.4964
30.34	6.13162	6.31541	7.39205	10.2028	15.5055
30.44	6.13234	6.32019	7.39983	10.2131	15.5145
30.54	6.13305	6.32496	7.40759	10.2233	15.5235
30.64	6.13377	6.32972	7.41534	10.2336	15.5324
30.74	6.13448	6.33448	7.42308	10.2438	15.5413
30.84	6.13519	6.33924	7.4308	10.254	15.5502
30.94	6.13591	6.34399	7.4385	10.2641	15.559
31.04	6.13662	6.34873	7.44619	10.2742	15.5677
31.14	6.13733	6.35347	7.45387	10.2843	15.5764
31.24	6.13804	6.35821	7.46154	10.2943	15.585
31.34	6.13876	6.36293	7.46919	10.3044	15.5936
31.44	6.13947	6.36766	7.47682	10.3143	15.6021
31.54	6.14018	6.37237	7.48445	10.3243	15.6106
31.64	6.14089	6.37709	7.49206	10.3342	15.619
31.74	6.1416	6.38179	7.49965	10.3441	15.6274
31.84	6.14231	6.38649	7.50723	10.354	15.6357
31.94	6.14302	6.39119	7.5148	10.3638	15.644
32.04	6.14372	6.39588	7.52235	10.3736	15.6523
32.14	6.14443	6.40057	7.52989	10.3833	15.6604
32.24	6.14514	6.40525	7.53742	10.3931	15.6686
32.34	6.14585	6.40992	7.54493	10.4028	15.6767
32.44	6.14656	6.41459	7.55243	10.4124	15.6847
32.54	6.14726	6.41925	7.55992	10.4221	15.6927
32.64	6.14797	6.42391	7.56739	10.4317	15.7007
32.74	6.14868	6.42857	7.57485	10.4413	15.7086
32.84	6.14938	6.43321	7.58229	10.4508	15.7164
32.94	6.15009	6.43786	7.58972	10.4603	15.7242
33.04	6.15079	6.44249	7.59714	10.4698	15.732
33.14	6.1515	6.44713	7.60455	10.4793	15.7397
33.24	6.1522	6.45175	7.61194	10.4887	15.7474
33.34	6.1529	6.45638	7.61931	10.4981	15.755
33.44	6.15361	6.46099	7.62668	10.5075	15.7626
33.54	6.15431	6.4656	7.63403	10.5168	15.7701
33.64	6.15501	6.47021	7.64137	10.5261	15.7776
33.74	6.15571	6.47481	7.64869	10.5354	15.7851
33.84	6.15642	6.47941	7.656	10.5447	15.7925
33.94	6.15712	6.484	7.6633	10.5539	15.7999
34.04	6.15782	6.48858	7.67058	10.5631	15.8072
34.14	6.15852	6.49316	7.67785	10.5722	15.8145
34.24	6.15922	6.49773	7.68511	10.5814	15.8217
34.34	6.15992	6.5023	7.69236	10.5905	15.8289
34.44	6.16062	6.50687	7.69959	10.5996	15.836
34.54	6.16132	6.51143	7.70681	10.6086	15.8431
34.64	6.16202	6.51598	7.71401	10.6176	15.8502
34.74	6.16272	6.52053	7.7212	10.6266	15.8572
34.84	6.16341	6.52507	7.72838	10.6356	15.8642
34.94	6.16411	6.52961	7.73555	10.6445	15.8712
35.04	6.16481	6.53414	7.7427	10.6534	15.8781
35.14	6.16551	6.53867	7.74984	10.6623	15.8849
35.24	6.1662	6.54319	7.75697	10.6712	15.8917
35.34	6.1669	6.54771	7.76408	10.68	15.8985
35.44	6.16759	6.55222	7.77118	10.6888	15.9053
35.54	6.16829	6.55673	7.77827	10.6975	15.912
35.64	6.16898	6.56123	7.78535	10.7063	15.9186
35.74	6.16968	6.56573	7.79241	10.715	15.9253
35.84	6.17037	6.57022	7.79946	10.7237	15.9318
35.94	6.17107	6.57471	7.8065	10.7323	15.9384
36.04	6.17176	6.57919	7.81352	10.7409	15.9449
36.14	6.17245	6.58367	7.82053	10.7495	15.9514
36.24	6.17315	6.58814	7.82753	10.7581	15.9578
36.34	6.17384	6.59261	7.83452	10.7667	15.9642
36.44	6.17453	6.59707	7.84149	10.7752	15.9705
36.54	6.17522	6.60152	7.84845	10.7837	15.9769
36.64	6.17591	6.60598	7.8554	10.7921	15.9831
36.74	6.1766	6.61042	7.86234	10.8006	15.9894
36.84	6.17729	6.61486	7.86926	10.809	15.9956
36.94	6.17798	6.6193	7.87617	10.8174	16.0018
37.04	6.17867	6.62373	7.88307	10.8257	16.0079
37.14	6.17936	6.62816	7.88995	10.8341	16.014
37.24	6.18005	6.63258	7.89683	10.8424	16.0201
37.34	6.18074	6.63699	7.90369	10.8506	16.0261
37.44	6.18143	6.6414	7.91053	10.8589	16.0321
37.54	6.18212	6.64581	7.91737	10.8671	16.038
37.64	6.1828	6.65021	7.92419	10.8753	16.044
37.74	6.18349	6.65461	7.931	10.8835	16.0499
37.84	6.18418	6.659	7.9378	10.8916	16.0557
37.94	6.18486	6.66338	7.94459	10.8998	16.0615
38.04	6.18555	6.66776	7.95136	10.9079	16.0673
38.14	6.18624	6.67214	7.95812	10.9159	16.0731
38.24	6.18692	6.67651	7.96487	10.924	16.0788
38.34	6.18761	6.68088	7.97161	10.932	16.0845
38.44	6.18829	6.68524	7.97833	10.94	16.0901
38.54	6.18897	6.68959	7.98505	10.948	16.0957
38.64	6.18966	6.69394	7.99175	10.9559	16.1013
38.74	6.19034	6.69829	7.99843	10.9638	16.1069
38.84	6.19102	6.70263	8.00511	10.9717	16.1124
38.94	6.19171	6.70697	8.01177	10.9796	16.1179
39.04	6.19239	6.7113	8.01842	10.9874	16.1233
39.14	6.19307	6.71563	8.02506	10.9953	16.1287
39.24	6.19375	6.71995	8.03169	11.0031	16.1341
39.34	6.19443	6.72426	8.03831	11.0108	16.1395
39.44	6.19511	6.72857	8.04491	11.0186	16.1448
39.54	6.1958	6.73288	8.0515	11.0263	16.1501
39.64	6.19648	6.73718	8.05808	11.034	16.1554
39.74	6.19715	6.74148	8.06465	11.0417	16.1606
39.84	6.19783	6.74577	8.07121	11.0493	16.1658
39.94	6.19851	6.75006	8.07775	11.0569	16.171
40.04	6.19919	6.75434	8.08428	11.0645	16.1761
40.14	6.19987	6.75862	8.0908	11.0721	16.1813
40.24	6.20055	6.76289	8.09731	11.0797	16.1863
40.34	6.20122	6.76716	8.10381	11.0872	16.1914
40.44	6.2019	6.77142	8.11029	11.0947	16.1964
40.54	6.20258	6.77568	8.11676	11.1022	16.2014
40.64	6.20325	6.77993	8.12322	11.1096	16.2064
40.74	6.20393	6.78418	8.12967	11.1171	16.2113
40.84	6.20461	6.78842	8.13611	11.1245	16.2162
40.94	6.20528	6.79266	8.14254	11.1318	16.2211
41.04	6.20596	6.7969	8.14895	11.1392	16.2259
41.14	6.20663	6.80112	8.15536	11.1465	16.2308
41.24	6.2073	6.80535	8.16175	11.1539	16.2355
41.34	6.20798	6.80957	8.16813	11.1612	16.2403
41.44	6.20865	6.81378	8.17449	11.1684	16.245
41.54	6.20932	6.81799	8.18085	11.1757	16.2498
41.64	6.21	6.8222	8.18719	11.1829	16.2544
41.74	6.21067	6.8264	8.19353	11.1901	16.2591
41.84	6.21134	6.83059	8.19985	11.1973	16.2637
41.94	6.21201	6.83478	8.20616	11.2044	16.2683
42.04	6.21268	6.83897	8.21246	11.2116	16.2729
42.14	6.21335	6.84315	8.21875	11.2187	16.2774
42.24	6.21403	6.84733	8.22502	11.2257	16.2819
42.34	6.2147	6.8515	8.23129	11.2328	16.2864
42.44	6.21536	6.85567	8.23754	11.2399	16.2909
42.54	6.21603	6.85983	8.24378	11.2469	16.2953
42.64	6.2167	6.86398	8.25001	11.2539	16.2998
42.74	6.21737	6.86814	8.25623	11.2608	16.3041
42.84	6.21804	6.87228	8.26244	11.2678	16.3085
42.94	6.21871	6.87643	8.26864	11.2747	16.3128
43.04	6.21938	6.88057	8.27482	11.2816	16.3171
43.14	6.22004	6.8847	8.281	11.2885	16.3214
43.24	6.22071	6.88883	8.28716	11.2954	16.3257
43.34	6.22138	6.89295	8.29331	11.3022	16.3299
43.44	6.22204	6.89707	8.29945	11.3091	16.3341
43.54	6.22271	6.90119	8.30558	11.3159	16.3383
43.64	6.22337	6.9053	8.3117	11.3226	16.3425
43.74	6.22404	6.9094	8.31781	11.3294	16.3466
43.84	6.2247	6.9135	8.3239	11.3361	16.3507
43.94	6.22537	6.9176	8.32999	11.3428	16.3548
44.04	6.22603	6.92169	8.33606	11.3495	16.3589
44.14	6.22669	6.92578	8.34213	11.3562	16.3629
44.24	6.22736	6.92986	8.34818	11.3629	16.3669
44.34	6.22802	6.93394	8.35422	11.3695	16.3709
44.44	6.22868	6.93801	8.36025	11.3761	16.3749
44.54	6.22934	6.94208	8.36627	11.3827	16.3788
44.64	6.23001	6.94614	8.37228	11.3893	16.3828
44.74	6.23067	6.9502	8.37827	11.3958	16.3867
44.84	6.23133	6.95426	8.38426	11.4023	16.3905
44.94	6.23199	6.95831	8.39024	11.4088	16.3944
45.04	6.23265	6.96235	8.3962	11.4153	16.3982
45.14	6.23331	6.96639	8.40215	11.4218	16.402
45.24	6.23397	6.97043	8.4081	11.4282	16.4058
45.34	6.23463	6.97446	8.41403	11.4346	16.4096
45.44	6.23529	6.97849	8.41995	11.4411	16.4133
45.54	6.23595	6.98251	8.42586	11.4474	16.4171
45.64	6.2366	6.98653	8.43176	11.4538	16.4208
45.74	6.23726	6.99054	8.43765	11.4601	16.4244
45.84	6.23792	6.99455	8.44353	11.4665	16.4281
45.94	6.23858	6.99855	8.4494	11.4728	16.4317
46.04	6.23923	7.00255	8.45526	11.479	16.4353
46.14	6.23989	7.00655	8.4611	11.4853	16.4389
46.24	6.24054	7.01054	8.46694	11.4915	16.4425
46.34	6.2412	7.01452	8.47276	11.4978	16.446
46.44	6.24186	7.0185	8.47858	11.504	16.4496
46.54	6.24251	7.02248	8.48438	11.5102	16.4531
46.64	6.24316	7.02645	8.49018	11.5163	16.4566
46.74	6.24382	7.03042	8.49596	11.5225	16.46
46.84	6.24447	7.03438	8.50173	11.5286	16.4635
46.94	6.24513	7.03834	8.5075	11.5347	16.4669
47.04	6.24578	7.0423	8.51325	11.5408	16.4703
47.14	6.24643	7.04625	8.51899	11.5468	16.4737
47.24	6.24708	7.05019	8.52472	11.5529	16.4771
47.34	6.24774	7.05413	8.53044	11.5589	16.4804
47.44	6.24839	7.05807	8.53615	11.5649	16.4837
47.54	6.24904	7.062	8.54185	11.5709	16.487
47.64	6.24969	7.06593	8.54754	11.5769	16.4903
47.74	6.25034	7.06985	8.55322	11.5828	16.4936
47.84	6.25099	7.07377	8.55889	11.5888	16.4968
47.94	6.25164	7.07768	8.56455	11.5947	16.5001
48.04	6.25229	7.08159	8.5702	11.6006	16.5033
48.14	6.25294	7.0855	8.57583	11.6065	16.5065
48.24	6.25359	7.0894	8.58146	11.6123	16.5097
48.34	6.25424	7.09329	8.58708	11.6182	16.5128
48.44	6.25489	7.09719	8.59269	11.624	16.5159
48.54	6.25553	7.10107	8.59828	11.6298	16.5191
48.64	6.25618	7.10496	8.60387	11.6356	16.5222
48.74	6.25683	7.10883	8.60945	11.6413	16.5252
48.84	6.25747	7.11271	8.61502	11.6471	16.5283
48.94	6.25812	7.11658	8.62057	11.6528	16.5314
49.04	6.25877	7.12044	8.62612	11.6585	16.5344
49.14	6.25941	7.1243	8.63166	11.6642	16.5374
49.24	6.26006	7.12816	8.63718	11.6699	16.5404
49.34	6.2607	7.13201	8.6427	11.6755	16.5434
49.44	6.26135	7.13586	8.64821	11.6812	16.5463
49.54	6.26199	7.1397	8.6537	11.6868	16.5493
49.64	6.26264	7.14354	8.65919	11.6924	16.5522
49.74	6.26328	7.14737	8.66466	11.698	16.5551
49.84	6.26392	7.15121	8.67013	11.7036	16.558
49.94	6.26456	7.15503	8.67559	11.7091	16.5608
50.04	6.26521	7.15885	8.68104	11.7146	16.5637
50.14	6.26585	7.16267	8.68647	11.7202	16.5665
50.24	6.26649	7.16648	8.6919	11.7257	16.5694
50.34	6.26713	7.17029	8.69732	11.7311	16.5722
50.44	6.26777	7.17409	8.70272	11.7366	16.575
50.54	6.26841	7.17789	8.70812	11.742	16.5777
50.64	6.26905	7.18169	8.71351	11.7475	16.5805
50.74	6.26969	7.18548	8.71889	11.7529	16.5832
50.84	6.27033	7.18927	8.72426	11.7583	16.5859
50.94	6.27097	7.19305	8.72961	11.7637	16.5887
51.04	6.27161	7.19683	8.73496	11.769	16.5913
51.14	6.27225	7.2006	8.7403	11.7744	16.594
51.24	6.27289	7.20437	8.74563	11.7797	16.5967
51.34	6.27353	7.20814	8.75095	11.785	16.5993
51.44	6.27417	7.2119	8.75626	11.7903	16.602
51.54	6.2748	7.21565	8.76156	11.7956	16.6046
51.64	6.27544	7.21941	8.76685	11.8008	16.6072
51.74	6.27608	7.22315	8.77213	11.8061	16.6097
51.84	6.27671	7.2269	8.7774	11.8113	16.6123
51.94	6.27735	7.23064	8.78267	11.8165	16.6149
52.04	6.27798	7.23437	8.78792	11.8217	16.6174
52.14	6.27862	7.2381	8.79316	11.8269	16.6199
52.24	6.27925	7.24183	8.7984	11.832	16.6224
52.34	6.27989	7.24555	8.80362	11.8372	16.6249
52.44	6.28052	7.24927	8.80883	11.8423	16.6274
52.54	6.28116	7.25299	8.81404	11.8474	16.6299
52.64	6.28179	7.2567	8.81923	11.8525	16.6323
52.74	6.28242	7.2604	8.82442	11.8576	16.6348
52.84	6.28306	7.2641	8.8296	11.8627	16.6372
52.94	6.28369	7.2678	8.83476	11.8677	16.6396
53.04	6.28432	7.27149	8.83992	11.8727	16.642
53.14	6.28495	7.27518	8.84507	11.8777	16.6444
53.24	6.28558	7.27887	8.85021	11.8827	16.6467
53.34	6.28621	7.28255	8.85534	11.8877	16.6491
53.44	6.28684	7.28622	8.86046	11.8927	16.6514
53.54	6.28748	7.2899	8.86557	11.8976	16.6537
53.64	6.28811	7.29356	8.87067	11.9026	16.656
53.74	6.28873	7.29723	8.87577	11.9075	16.6583
53.84	6.28936	7.30089	8.88085	11.9124	16.6606
53.94	6.28999	7.30454	8.88592	11.9173	16.6629
54.04	6.29062	7.30819	8.89099	11.9222	16.6651
54.14	6.29125	7.31184	8.89604	11.927	16.6674
54.24	6.29188	7.31548	8.90109	11.9319	16.6696
54.34	6.29251	7.31912	8.90613	11.9367	16.6718
54.44	6.29313	7.32276	8.91116	11.9415	16.674
54.54	6.29376	7.32639	8.91618	11.9463	16.6762
54.64	6.29439	7.33001	8.92119	11.9511	16.6784
54.74	6.29501	7.33364	8.92619	11.9559	16.6806
54.84	6.29564	7.33725	8.93118	11.9606	16.6827
54.94	6.29626	7.34087	8.93616	11.9653	16.6849
55.04	6.29689	7.34448	8.94114	11.9701	16.687
55.14	6.29751	7.34808	8.9461	11.9748	16.6891
55.24	6.29814	7.35168	8.95106	11.9795	16.6912
55.34	6.29876	7.35528	8.956	11.9841	16.6933
55.44	6.29939	7.35888	8.96094	11.9888	16.6954
55.54	6.30001	7.36247	8.96587	11.9934	16.6974
55.64	6.30063	7.36605	8.97079	11.9981	16.6995
55.74	6.30126	7.36963	8.9757	12.0027	16.7015
55.84	6.30188	7.37321	8.9806	12.0073	16.7036
55.94	6.3025	7.37678	8.9855	12.0119	16.7056
56.04	6.30312	7.38035	8.99038	12.0165	16.7076
56.14	6.30374	7.38392	8.99526	12.021	16.7096
56.24	6.30437	7.38748	9.00012	12.0256	16.7116
56.34	6.30499	7.39103	9.00498	12.0301	16.7135
56.44	6.30561	7.39459	9.00983	12.0346	16.7155
56.54	6.30623	7.39814	9.01467	12.0391	16.7174
56.64	6.30685	7.40168	9.0195	12.0436	16.7194
56.74	6.30747	7.40522	9.02432	12.0481	16.7213
56.84	6.30809	7.40876	9.02914	12.0525	16.7232
56.94	6.3087	7.41229	9.03394	12.057	16.7251
57.04	6.30932	7.41582	9.03874	12.0614	16.727
57.14	6.30994	7.41934	9.04353	12.0658	16.7289
57.24	6.31056	7.42286	9.04831	12.0702	16.7308
57.34	6.31118	7.42638	9.05308	12.0746	16.7326
57.44	6.31179	7.42989	9.05784	12.079	16.7345
57.54	6.31241	7.4334	9.06259	12.0834	16.7363
57.64	6.31303	7.43691	9.06733	12.0877	16.7381
57.74	6.31364	7.44041	9.07207	12.092	16.7399
57.84	6.31426	7.4439	9.0768	12.0964	16.7417
57.94	6.31487	7.4474	9.08152	12.1007	16.7435
58.04	6.31549	7.45088	9.08623	12.105	16.7453
58.14	6.3161	7.45437	9.09093	12.1092	16.7471
58.24	6.31672	7.45785	9.09562	12.1135	16.7488
58.34	6.31733	7.46133	9.10031	12.1177	16.7506
58.44	6.31795	7.4648	9.10498	12.122	16.7523
58.54	6.31856	7.46827	9.10965	12.1262	16.7541
58.64	6.31917	7.47173	9.11431	12.1304	16.7558
58.74	6.31978	7.47519	9.11896	12.1346	16.7575
58.84	6.3204	7.47865	9.1236	12.1388	16.7592
58.94	6.32101	7.4821	9.12823	12.143	16.7609
59.04	6.32162	7.48555	9.13286	12.1471	16.7626
59.14	6.32223	7.489	9.13748	12.1513	16.7642
59.24	6.32284	7.49244	9.14208	12.1554	16.7659
59.34	6.32345	7.49588	9.14668	12.1595	16.7676
59.44	6.32406	7.49931	9.15128	12.1636	16.7692
59.54	6.32467	7.50274	9.15586	12.1677	16.7708
59.64	6.32528	7.50617	9.16043	12.1718	16.7725
59.74	6.32589	7.50959	9.165	12.1759	16.7741
59.84	6.3265	7.51301	9.16956	12.1799	16.7757
59.94	6.32711	7.51642	9.17411	12.184	16.7773
60.04	6.32772	7.51983	9.17865	12.188	16.7788
60.14	6.32833	7.52324	9.18319	12.192	16.7804
60.24	6.32894	7.52664	9.18771	12.196	16.782
60.34	6.32954	7.53004	9.19223	12.2	16.7835
60.44	6.33015	7.53343	9.19674	12.204	16.7851
60.54	6.33076	7.53682	9.20124	12.208	16.7866
60.64	6.33136	7.54021	9.20573	12.2119	16.7882
60.74	6.33197	7.54359	9.21022	12.2159	16.7897
60.84	6.33258	7.54697	9.21469	12.2198	16.7912
60.94	6.33318	7.55035	9.21916	12.2237	16.7927
61.04	6.33379	7.55372	9.22362	12.2276	16.7942
61.14	6.33439	7.55709	9.22807	12.2315	16.7957
61.24	6.33499	7.56045	9.23252	12.2354	16.7972
61.34	6.3356	7.56381	9.23695	12.2392	16.7986
61.44	6.3362	7.56717	9.24138	12.2431	16.8001
61.54	6.33681	7.57052	9.2458	12.2469	16.8015
61.64	6.33741	7.57387	9.25021	12.2508	16.803
61.74	6.33801	7.57721	9.25462	12.2546	16.8044
61.84	6.33861	7.58055	9.25901	12.2584	16.8058
61.94	6.33922	7.58389	9.2634	12.2622	16.8073
62.04	6.33982	7.58722	9.26778	12.266	16.8087
62.14	6.34042	7.59055	9.27215	12.2697	16.8101
62.24	6.34102	7.59388	9.27651	12.2735	16.8115
62.34	6.34162	7.5972	9.28087	12.2772	16.8128
62.44	6.34222	7.60052	9.28522	12.281	16.8142
62.54	6.34282	7.60383	9.28956	12.2847	16.8156
62.64	6.34342	7.60714	9.29389	12.2884	16.8169
62.74	6.34402	7.61045	9.29822	12.2921	16.8183
62.84	6.34462	7.61375	9.30253	12.2958	16.8196
62.94	6.34522	7.61705	9.30684	12.2994	16.821
63.04	6.34582	7.62035	9.31114	12.3031	16.8223
63.14	6.34642	7.62364	9.31544	12.3068	16.8236
63.24	6.34701	7.62693	9.31972	12.3104	16.8249
63.34	6.34761	7.63021	9.324	12.314	16.8262
63.44	6.34821	7.63349	9.32827	12.3176	16.8275
63.54	6.34881	7.63677	9.33253	12.3212	16.8288
63.64	6.3494	7.64004	9.33679	12.3248	16.8301
63.74	6.35	7.64331	9.34103	12.3284	16.8314
63.84	6.35059	7.64658	9.34527	12.332	16.8327
63.94	6.35119	7.64984	9.3495	12.3356	16.8339
64.04	6.35179	7.6531	9.35373	12.3391	16.8352
64.14	6.35238	7.65635	9.35794	12.3426	16.8364
64.24	6.35298	7.6596	9.36215	12.3462	16.8376
64.34	6.35357	7.66285	9.36635	12.3497	16.8389
64.44	6.35416	7.66609	9.37054	12.3532	16.8401
64.54	6.35476	7.66933	9.37473	12.3567	16.8413
64.64	6.35535	7.67257	9.37891	12.3602	16.8425
64.74	6.35594	7.6758	9.38308	12.3636	16.8437
64.84	6.35654	7.67903	9.38724	12.3671	16.8449
64.94	6.35713	7.68226	9.39139	12.3705	16.8461
65.04	6.35772	7.68548	9.39554	12.374	16.8473
65.14	6.35831	7.6887	9.39968	12.3774	16.8485
65.24	6.3589	7.69191	9.40382	12.3808	16.8496
65.34	6.35949	7.69512	9.40794	12.3842	16.8508
65.44	6.36009	7.69833	9.41206	12.3876	16.8519
65.54	6.36068	7.70153	9.41617	12.391	16.8531
65.64	6.36127	7.70473	9.42027	12.3944	16.8542
65.74	6.36186	7.70793	9.42437	12.3977	16.8554
65.84	6.36245	7.71112	9.42845	12.4011	16.8565
65.94	6.36303	7.71431	9.43253	12.4044	16.8576
66.04	6.36362	7.71749	9.43661	12.4078	16.8587
66.14	6.36421	7.72067	9.44067	12.4111	16.8598
66.24	6.3648	7.72385	9.44473	12.4144	16.8609
66.34	6.36539	7.72702	9.44878	12.4177	16.862
66.44	6.36598	7.73019	9.45282	12.421	16.8631
66.54	6.36656	7.73336	9.45686	12.4243	16.8642
66.64	6.36715	7.73652	9.46089	12.4275	16.8653
66.74	6.36774	7.73968	9.46491	12.4308	16.8663
66.84	6.36832	7.74284	9.46892	12.434	16.8674
66.94	6.36891	7.74599	9.47293	12.4373	16.8685
67.04	6.36949	7.74914	9.47693	12.4405	16.8695
67.14	6.37008	7.75229	9.48092	12.4437	16.8705
67.24	6.37066	7.75543	9.48491	12.4469	16.8716
67.34	6.37125	7.75857	9.48889	12.4501	16.8726
67.44	6.37183	7.7617	9.49286	12.4533	16.8736
67.54	6.37242	7.76483	9.49682	12.4565	16.8747
67.64	6.373	7.76796	9.50078	12.4596	16.8757
67.74	6.37358	7.77108	9.50473	12.4628	16.8767
67.84	6.37417	7.7742	9.50867	12.4659	16.8777
67.94	6.37475	7.77732	9.5126	12.4691	16.8787
68.04	6.37533	7.78043	9.51653	12.4722	16.8797
68.14	6.37591	7.78354	9.52045	12.4753	16.8807
68.24	6.3765	7.78665	9.52436	12.4784	16.8816
68.34	6.37708	7.78975	9.52827	12.4815	16.8826
68.44	6.37766	7.79285	9.53217	12.4846	16.8836
68.54	6.37824	7.79595	9.53606	12.4877	16.8845
68.64	6.37882	7.79904	9.53995	12.4907	16.8855
68.74	6.3794	7.80213	9.54382	12.4938	16.8864
68.84	6.37998	7.80521	9.54769	12.4968	16.8874
68.94	6.38056	7.80829	9.55156	12.4999	16.8883
69.04	6.38114	7.81137	9.55541	12.5029	16.8893
69.14	6.38172	7.81445	9.55926	12.5059	16.8902
69.24	6.3823	7.81752	9.56311	12.5089	16.8911
69.34	6.38288	7.82058	9.56694	12.5119	16.892
69.44	6.38345	7.82365	9.57077	12.5149	16.8929
69.54	6.38403	7.82671	9.57459	12.5179	16.8938
69.64	6.38461	7.82977	9.57841	12.5209	16.8947
69.74	6.38519	7.83282	9.58222	12.5238	16.8956
69.84	6.38576	7.83587	9.58602	12.5268	16.8965
69.94	6.38634	7.83892	9.58981	12.5297	16.8974
70.04	6.38691	7.84196	9.5936	12.5327	16.8983
70.14	6.38749	7.845	9.59738	12.5356	16.8992
70.24	6.38807	7.84804	9.60115	12.5385	16.9
70.34	6.38864	7.85107	9.60492	12.5414	16.9009
70.44	6.38922	7.8541	9.60868	12.5443	16.9018
70.54	6.38979	7.85712	9.61243	12.5472	16.9026
70.64	6.39037	7.86015	9.61618	12.5501	16.9035
70.74	6.39094	7.86316	9.61992	12.5529	16.9043
70.84	6.39151	7.86618	9.62365	12.5558	16.9051
70.94	6.39209	7.86919	9.62738	12.5586	16.906
71.04	6.39266	7.8722	9.6311	12.5615	16.9068
71.14	6.39323	7.87521	9.63481	12.5643	16.9076
71.24	6.3938	7.87821	9.63852	12.5671	16.9084
71.34	6.39438	7.88121	9.64222	12.57	16.9093
71.44	6.39495	7.8842	9.64591	12.5728	16.9101
71.54	6.39552	7.88719	9.64959	12.5756	16.9109
71.64	6.39609	7.89018	9.65327	12.5784	16.9117
71.74	6.39666	7.89317	9.65694	12.5811	16.9125
71.84	6.39723	7.89615	9.66061	12.5839	16.9133
71.94	6.3978	7.89912	9.66427	12.5867	16.9141
72.04	6.39837	7.9021	9.66792	12.5894	16.9148
72.14	6.39894	7.90507	9.67157	12.5922	16.9156
72.24	6.39951	7.90804	9.67521	12.5949	16.9164
72.34	6.40008	7.911	9.67884	12.5976	16.9172
72.44	6.40065	7.91396	9.68246	12.6003	16.9179
72.54	6.40122	7.91692	9.68608	12.6031	16.9187
72.64	6.40178	7.91988	9.6897	12.6058	16.9194
72.74	6.40235	7.92283	9.6933	12.6084	16.9202
72.84	6.40292	7.92577	9.6969	12.6111	16.9209
72.94	6.40349	7.92872	9.70049	12.6138	16.9217
73.04	6.40405	7.93166	9.70408	12.6165	16.9224
73.14	6.40462	7.9346	9.70766	12.6191	16.9231
73.24	6.40519	7.93753	9.71123	12.6218	16.9239
73.34	6.40575	7.94046	9.7148	12.6244	16.9246
73.44	6.40632	7.94339	9.71836	12.6271	16.9253
73.54	6.40688	7.94631	9.72192	12.6297	16.926
73.64	6.40745	7.94924	9.72546	12.6323	16.9267
73.74	6.40801	7.95215	9.729	12.6349	16.9275
73.84	6.40858	7.95507	9.73254	12.6375	16.9282
73.94	6.40914	7.95798	9.73607	12.6401	16.9289
74.04	6.4097	7.96089	9.73959	12.6427	16.9295
74.14	6.41027	7.96379	9.74311	12.6453	16.9302
74.24	6.41083	7.96669	9.74661	12.6478	16.9309
74.34	6.41139	7.96959	9.75012	12.6504	16.9316
74.44	6.41196	7.97248	9.75361	12.6529	16.9323
74.54	6.41252	7.97537	9.7571	12.6555	16.933
74.64	6.41308	7.97826	9.76059	12.658	16.9336
74.74	6.41364	7.98115	9.76407	12.6605	16.9343
74.84	6.4142	7.98403	9.76754	12.6631	16.935
74.94	6.41476	7.98691	9.771	12.6656	16.9356
75.04	6.41532	7.98978	9.77446	12.6681	16.9363
75.14	6.41588	7.99265	9.77791	12.6706	16.9369
75.24	6.41644	7.99552	9.78136	12.6731	16.9376
75.34	6.417	7.99839	9.7848	12.6755	16.9382
75.44	6.41756	8.00125	9.78823	12.678	16.9389
75.54	6.41812	8.00411	9.79166	12.6805	16.9395
75.64	6.41868	8.00696	9.79508	12.6829	16.9401
75.74	6.41924	8.00981	9.79849	12.6854	16.9408
75.84	6.4198	8.01266	9.8019	12.6878	16.9414
75.94	6.42036	8.01551	9.80531	12.6902	16.942
76.04	6.42091	8.01835	9.8087	12.6927	16.9426
76.14	6.42147	8.02119	9.81209	12.6951	16.9432
76.24	6.42203	8.02402	9.81548	12.6975	16.9439
76.34	6.42258	8.02686	9.81885	12.6999	16.9445
76.44	6.42314	8.02968	9.82222	12.7023	16.9451
76.54	6.4237	8.03251	9.82559	12.7047	16.9457
76.64	6.42425	8.03533	9.82895	12.7071	16.9463
76.74	6.42481	8.03815	9.8323	12.7094	16.9469
76.84	6.42536	8.04097	9.83565	12.7118	16.9474
76.94	6.42592	8.04378	9.83899	12.7142	16.948
77.04	6.42647	8.04659	9.84233	12.7165	16.9486
77.14	6.42703	8.0494	9.84566	12.7188	16.9492
77.24	6.42758	8.0522	9.84898	12.7212	16.9498
77.34	6.42813	8.055	9.8523	12.7235	16.9503
77.44	6.42869	8.0578	9.85561	12.7258	16.9509
77.54	6.42924	8.06059	9.85891	12.7281	16.9515
77.64	6.42979	8.06339	9.86221	12.7304	16.952
77.74	6.43035	8.06617	9.8655	12.7327	16.9526
77.84	6.4309	8.06896	9.86879	12.735	16.9532
77.94	6.43145	8.07174	9.87207	12.7373	16.9537
78.04	6.432	8.07452	9.87535	12.7396	16.9543
78.14	6.43255	8.07729	9.87862	12.7419	16.9548
78.24	6.4331	8.08006	9.88188	12.7441	16.9553
78.34	6.43365	8.08283	9.88514	12.7464	16.9559
78.44	6.4342	8.0856	9.88839	12.7486	16.9564
78.54	6.43475	8.08836	9.89163	12.7509	16.957
78.64	6.4353	8.09112	9.89487	12.7531	16.9575
78.74	6.43585	8.09388	9.89811	12.7553	16.958
78.84	6.4364	8.09663	9.90133	12.7575	16.9585
78.94	6.43695	8.09938	9.90456	12.7597	16.9591
79.04	6.4375	8.10213	9.90777	12.7619	16.9596
79.14	6.43805	8.10487	9.91098	12.7641	16.9601
79.24	6.4386	8.10761	9.91419	12.7663	16.9606
79.34	6.43914	8.11035	9.91739	12.7685	16.9611
79.44	6.43969	8.11308	9.92058	12.7707	16.9616
79.54	6.44024	8.11581	9.92377	12.7729	16.9621
79.64	6.44078	8.11854	9.92695	12.775	16.9626
79.74	6.44133	8.12127	9.93012	12.7772	16.9631
79.84	6.44188	8.12399	9.93329	12.7793	16.9636
79.94	6.44242	8.12671	9.93646	12.7815	16.9641
80.04	6.44297	8.12942	9.93961	12.7836	16.9646
80.14	6.44351	8.13213	9.94277	12.7857	16.9651
80.24	6.44406	8.13484	9.94591	12.7879	16.9656
80.34	6.4446	8.13755	9.94905	12.79	16.966
80.44	6.44515	8.14025	9.95219	12.7921	16.9665
80.54	6.44569	8.14295	9.95532	12.7942	16.967
80.64	6.44624	8.14565	9.95844	12.7963	16.9675
80.74	6.44678	8.14834	9.96156	12.7984	16.9679
80.84	6.44732	8.15104	9.96467	12.8005	16.9684
80.94	6.44787	8.15372	9.96778	12.8025	16.9689
81.04	6.44841	8.15641	9.97088	12.8046	16.9693
81.14	6.44895	8.15909	9.97398	12.8067	16.9698
81.24	6.44949	8.16177	9.97707	12.8087	16.9702
81.34	6.45003	8.16444	9.98015	12.8108	16.9707
81.44	6.45058	8.16712	9.98323	12.8128	16.9711
81.54	6.45112	8.16979	9.98631	12.8149	16.9716
81.64	6.45166	8.17245	9.98937	12.8169	16.972
81.74	6.4522	8.17512	9.99244	12.8189	16.9725
81.84	6.45274	8.17778	9.99549	12.8209	16.9729
81.94	6.45328	8.18043	9.99854	12.8229	16.9733
82.04	6.45382	8.18309	10.0016	12.8249	16.9738
82.14	6.45436	8.18574	10.0046	12.8269	16.9742
82.24	6.4549	8.18839	10.0077	12.8289	16.9746
82.34	6.45543	8.19103	10.0107	12.8309	16.9751
82.44	6.45597	8.19368	10.0137	12.8329	16.9755
82.54	6.45651	8.19632	10.0167	12.8349	16.9759
82.64	6.45705	8.19895	10.0197	12.8368	16.9763
82.74	6.45759	8.20159	10.0228	12.8388	16.9767
82.84	6.45812	8.20422	10.0258	12.8407	16.9772
82.94	6.45866	8.20684	10.0288	12.8427	16.9776
83.04	6.4592	8.20947	10.0317	12.8446	16.978
83.14	6.45973	8.21209	10.0347	12.8466	16.9784
83.24	6.46027	8.21471	10.0377	12.8485	16.9788
83.34	6.46081	8.21732	10.0407	12.8504	16.9792
83.44	6.46134	8.21994	10.0436	12.8523	16.9796
83.54	6.46188	8.22255	10.0466	12.8543	16.98
83.64	6.46241	8.22515	10.0496	12.8562	16.9804
83.74	6.46295	8.22776	10.0525	12.8581	16.9808
83.84	6.46348	8.23036	10.0555	12.86	16.9812
83.94	6.46401	8.23295	10.0584	12.8618	16.9816
84.04	6.46455	8.23555	10.0614	12.8637	16.9819
84.14	6.46508	8.23814	10.0643	12.8656	16.9823
84.24	6.46562	8.24073	10.0672	12.8675	16.9827
84.34	6.46615	8.24332	10.0701	12.8693	16.9831
84.44	6.46668	8.2459	10.073	12.8712	16.9835
84.54	6.46721	8.24848	10.076	12.873	16.9838
84.64	6.46774	8.25106	10.0789	12.8749	16.9842
84.74	6.46828	8.25363	10.0818	12.8767	16.9846
84.84	6.46881	8.2562	10.0847	12.8786	16.985
84.94	6.46934	8.25877	10.0875	12.8804	16.9853
85.04	6.46987	8.26133	10.0904	12.8822	16.9857
85.14	6.4704	8.2639	10.0933	12.884	16.986
85.24	6.47093	8.26646	10.0962	12.8858	16.9864
85.34	6.47146	8.26901	10.099	12.8876	16.9868
85.44	6.47199	8.27157	10.1019	12.8894	16.9871
85.54	6.47252	8.27412	10.1048	12.8912	16.9875
85.64	6.47305	8.27667	10.1076	12.893	16.9878
85.74	6.47358	8.27921	10.1105	12.8948	16.9882
85.84	6.47411	8.28175	10.1133	12.8966	16.9885
85.94	6.47463	8.28429	10.1161	12.8984	16.9889
86.04	6.47516	8.28683	10.119	12.9001	16.9892
86.14	6.47569	8.28936	10.1218	12.9019	16.9895
86.24	6.47622	8.29189	10.1246	12.9036	16.9899
86.34	6.47675	8.29442	10.1274	12.9054	16.9902
86.44	6.47727	8.29694	10.1303	12.9071	16.9906
86.54	6.4778	8.29947	10.1331	12.9089	16.9909
86.64	6.47832	8.30199	10.1359	12.9106	16.9912
86.74	6.47885	8.3045	10.1387	12.9123	16.9915
86.84	6.47938	8.30701	10.1415	12.914	16.9919
86.94	6.4799	8.30952	10.1442	12.9158	16.9922
87.04	6.48043	8.31203	10.147	12.9175	16.9925
87.14	6.48095	8.31454	10.1498	12.9192	16.9928
87.24	6.48148	8.31704	10.1526	12.9209	16.9932
87.34	6.482	8.31954	10.1553	12.9226	16.9935
87.44	6.48252	8.32203	10.1581	12.9243	16.9938
87.54	6.48305	8.32453	10.1609	12.9259	16.9941
87.64	6.48357	8.32702	10.1636	12.9276	16.9944
87.74	6.48409	8.32951	10.1663	12.9293	16.9947
87.84	6.48462	8.33199	10.1691	12.931	16.995
87.94	6.48514	8.33447	10.1718	12.9326	16.9954
88.04	6.48566	8.33695	10.1746	12.9343	16.9957
88.14	6.48618	8.33943	10.1773	12.9359	16.996
88.24	6.48671	8.3419	10.18	12.9376	16.9963
88.34	6.48723	8.34437	10.1827	12.9392	16.9966
88.44	6.48775	8.34684	10.1854	12.9409	16.9969
88.54	6.48827	8.34931	10.1881	12.9425	16.9972
88.64	6.48879	8.35177	10.1908	12.9441	16.9975
88.74	6.48931	8.35423	10.1935	12.9457	16.9977
88.84	6.48983	8.35668	10.1962	12.9473	16.998
88.94	6.49035	8.35914	10.1989	12.949	16.9983
89.04	6.49087	8.36159	10.2016	12.9506	16.9986
89.14	6.49139	8.36404	10.2043	12.9522	16.9989
89.24	6.49191	8.36648	10.2069	12.9538	16.9992
89.34	6.49243	8.36893	10.2096	12.9553	16.9995
89.44	6.49294	8.37137	10.2123	12.9569	16.9997
89.54	6.49346	8.3738	10.2149	12.9585	17
89.64	6.49398	8.37624	10.2176	12.9601	17.0003
89.74	6.4945	8.37867	10.2202	12.9617	17.0006
89.84	6.49501	8.3811	10.2229	12.9632	17.0009
89.94	6.49553	8.38352	10.2255	12.9648	17.0011
90.04	6.49605	8.38595	10.2281	12.9663	17.0014
90.14	6.49656	8.38837	10.2308	12.9679	17.0017
90.24	6.49708	8.39079	10.2334	12.9694	17.0019
90.34	6.4976	8.3932	10.236	12.971	17.0022
90.44	6.49811	8.39561	10.2386	12.9725	17.0025
90.54	6.49863	8.39802	10.2412	12.974	17.0027
90.64	6.49914	8.40043	10.2438	12.9756	17.003
90.74	6.49966	8.40283	10.2464	12.9771	17.0032
90.84	6.50017	8.40524	10.249	12.9786	17.0035
90.94	6.50068	8.40763	10.2516	12.9801	17.0038
91.04	6.5012	8.41003	10.2542	12.9816	17.004
91.14	6.50171	8.41242	10.2568	12.9831	17.0043
91.24	6.50223	8.41481	10.2594	12.9846	17.0045
91.34	6.50274	8.4172	10.262	12.9861	17.0048
91.44	6.50325	8.41959	10.2645	12.9876	17.005
91.54	6.50376	8.42197	10.2671	12.9891	17.0053
91.64	6.50428	8.42435	10.2696	12.9906	17.0055
91.74	6.50479	8.42672	10.2722	12.992	17.0058
91.84	6.5053	8.4291	10.2747	12.9935	17.006
91.94	6.50581	8.43147	10.2773	12.995	17.0063
92.04	6.50632	8.43384	10.2798	12.9964	17.0065
92.14	6.50683	8.43621	10.2824	12.9979	17.0067
92.24	6.50734	8.43857	10.2849	12.9993	17.007
92.34	6.50785	8.44093	10.2874	13.0008	17.0072
92.44	6.50836	8.44329	10.2899	13.0022	17.0074
92.54	6.50887	8.44564	10.2925	13.0037	17.0077
92.64	6.50938	8.448	10.295	13.0051	17.0079
92.74	6.50989	8.45035	10.2975	13.0065	17.0081
92.84	6.5104	8.45269	10.3	13.0079	17.0084
92.94	6.51091	8.45504	10.3025	13.0094	17.0086
93.04	6.51142	8.45738	10.305	13.0108	17.0088
93.14	6.51192	8.45972	10.3075	13.0122	17.0091
93.24	6.51243	8.46206	10.3099	13.0136	17.0093
93.34	6.51294	8.46439	10.3124	13.015	17.0095
93.44	6.51345	8.46672	10.3149	13.0164	17.0097
93.54	6.51395	8.46905	10.3174	13.0178	17.0099
93.64	6.51446	8.47138	10.3198	13.0192	17.0102
93.74	6.51497	8.4737	10.3223	13.0205	17.0104
93.84	6.51547	8.47602	10.3248	13.0219	17.0106
93.94	6.51598	8.47834	10.3272	13.0233	17.0108
94.04	6.51648	8.48065	10.3297	13.0247	17.011
94.14	6.51699	8.48297	10.3321	13.026	17.0112
94.24	6.51749	8.48528	10.3345	13.0274	17.0115
94.34	6.518	8.48758	10.337	13.0287	17.0117
94.44	6.5185	8.48989	10.3394	13.0301	17.0119
94.54	6.51901	8.49219	10.3418	13.0314	17.0121
94.64	6.51951	8.49449	10.3443	13.0328	17.0123
94.74	6.52001	8.49679	10.3467	13.0341	17.0125
94.84	6.52052	8.49908	10.3491	13.0355	17.0127
94.94	6.52102	8.50137	10.3515	13.0368	17.0129
95.04	6.52152	8.50366	10.3539	13.0381	17.0131
95.14	6.52202	8.50595	10.3563	13.0394	17.0133
95.24	6.52253	8.50823	10.3587	13.0408	17.0135
95.34	6.52303	8.51052	10.3611	13.0421	17.0137
95.44	6.52353	8.51279	10.3635	13.0434	17.0139
95.54	6.52403	8.51507	10.3659	13.0447	17.0141
95.64	6.52453	8.51734	10.3682	13.046	17.0143
95.74	6.52503	8.51962	10.3706	13.0473	17.0145
95.84	6.52553	8.52188	10.373	13.0486	17.0147
95.94	6.52603	8.52415	10.3754	13.0499	17.0149
96.04	6.52653	8.52641	10.3777	13.0512	17.0151
96.14	6.52703	8.52867	10.3801	13.0524	17.0152
96.24	6.52753	8.53093	10.3824	13.0537	17.0154
96.34	6.52803	8.53319	10.3848	13.055	17.0156
96.44	6.52853	8.53544	10.3871	13.0563	17.0158
96.54	6.52903	8.53769	10.3895	13.0575	17.016
96.64	6.52953	8.53994	10.3918	13.0588	17.0162
96.74	6.53003	8.54218	10.3941	13.06	17.0164
96.84	6.53052	8.54443	10.3965	13.0613	17.0165
96.94	6.53102	8.54667	10.3988	13.0625	17.0167
97.04	6.53152	8.54891	10.4011	13.0638	17.0169
97.14	6.53202	8.55114	10.4034	13.065	17.0171
97.24	6.53251	8.55337	10.4057	13.0663	17.0173
97.34	6.53301	8.5556	10.408	13.0675	17.0174
97.44	6.5335	8.55783	10.4103	13.0687	17.0176
97.54	6.534	8.56006	10.4126	13.07	17.0178
97.64	6.5345	8.56228	10.4149	13.0712	17.018
97.74	6.53499	8.5645	10.4172	13.0724	17.0181
97.84	6.53549	8.56672	10.4195	13.0736	17.0183
97.94	6.53598	8.56893	10.4218	13.0748	17.0185
98.04	6.53648	8.57114	10.4241	13.076	17.0186
98.14	6.53697	8.57335	10.4263	13.0772	17.0188
98.24	6.53746	8.57556	10.4286	13.0784	17.019
98.34	6.53796	8.57777	10.4309	13.0796	17.0191
98.44	6.53845	8.57997	10.4331	13.0808	17.0193
98.54	6.53894	8.58217	10.4354	13.082	17.0195
98.64	6.53944	8.58436	10.4376	13.0832	17.0196
98.74	6.53993	8.58656	10.4399	13.0844	17.0198
98.84	6.54042	8.58875	10.4421	13.0855	17.02
98.94	6.54091	8.59094	10.4444	13.0867	17.0201
99.04	6.54141	8.59313	10.4466	13.0879	17.0203
99.14	6.5419	8.59531	10.4488	13.0891	17.0204
99.24	6.54239	8.5975	10.4511	13.0902	17.0206
99.34	6.54288	8.59968	10.4533	13.0914	17.0208
99.44	6.54337	8.60185	10.4555	13.0925	17.0209
99.54	6.54386	8.60403	10.4577	13.0937	17.0211
99.64	6.54435	8.6062	10.4599	13.0948	17.0212
99.74	6.54484	8.60837	10.4621	13.096	17.0214
99.84	6.54533	8.61054	10.4643	13.0971	17.0215
99.94	6.54582	8.6127	10.4665	13.0982	17.0217
100.04	6.54631	8.61487	10.4687	13.0994	17.0218
100.14	6.5468	8.61703	10.4709	13.1005	17.022
100.24	6.54729	8.61918	10.4731	13.1016	17.0221
100.34	6.54778	8.62134	10.4753	13.1028	17.0223
100.44	6.54826	8.62349	10.4775	13.1039	17.0224
100.54	6.54875	8.62564	10.4797	13.105	17.0226
100.64	6.54924	8.62779	10.4818	13.1061	17.0227
100.74	6.54973	8.62993	10.484	13.1072	17.0229
100.84	6.55021	8.63208	10.4862	13.1083	17.023
100.94	6.5507	8.63422	10.4883	13.1094	17.0231
101.04	6.55119	8.63636	10.4905	13.1105	17.0233
101.14	6.55167	8.63849	10.4926	13.1116	17.0234
101.24	6.55216	8.64063	10.4948	13.1127	17.0236
101.34	6.55265	8.64276	10.4969	13.1138	17.0237
101.44	6.55313	8.64488	10.4991	13.1149	17.0238
101.54	6.55362	8.64701	10.5012	13.1159	17.024
101.64	6.5541	8.64913	10.5033	13.117	17.0241
101.74	6.55459	8.65125	10.5055	13.1181	17.0243
101.84	6.55507	8.65337	10.5076	13.1192	17.0244
101.94	6.55555	8.65549	10.5097	13.1202	17.0245
102.04	6.55604	8.6576	10.5118	13.1213	17.0247
102.14	6.55652	8.65972	10.514	13.1223	17.0248
102.24	6.55701	8.66182	10.5161	13.1234	17.0249
102.34	6.55749	8.66393	10.5182	13.1245	17.0251
102.44	6.55797	8.66604	10.5203	13.1255	17.0252
102.54	6.55845	8.66814	10.5224	13.1265	17.0253
102.64	6.55894	8.67024	10.5245	13.1276	17.0254
102.74	6.55942	8.67233	10.5266	13.1286	17.0256
102.84	6.5599	8.67443	10.5286	13.1297	17.0257
102.94	6.56038	8.67652	10.5307	13.1307	17.0258
103.04	6.56086	8.67861	10.5328	13.1317	17.026
103.14	6.56134	8.6807	10.5349	13.1328	17.0261
103.24	6.56182	8.68278	10.537	13.1338	17.0262
103.34	6.5623	8.68487	10.539	13.1348	17.0263
103.44	6.56278	8.68695	10.5411	13.1358	17.0265
103.54	6.56326	8.68902	10.5431	13.1368	17.0266
103.64	6.56374	8.6911	10.5452	13.1378	17.0267
103.74	6.56422	8.69317	10.5473	13.1388	17.0268
103.84	6.5647	8.69524	10.5493	13.1398	17.0269
103.94	6.56518	8.69731	10.5514	13.1408	17.0271
104.04	6.56566	8.69938	10.5534	13.1418	17.0272
104.14	6.56614	8.70144	10.5554	13.1428	17.0273
104.24	6.56662	8.70351	10.5575	13.1438	17.0274
104.34	6.56709	8.70556	10.5595	13.1448	17.0275
104.44	6.56757	8.70762	10.5615	13.1458	17.0276
104.54	6.56805	8.70968	10.5635	13.1468	17.0278
104.64	6.56853	8.71173	10.5656	13.1478	17.0279
104.74	6.569	8.71378	10.5676	13.1487	17.028
104.84	6.56948	8.71583	10.5696	13.1497	17.0281
104.94	6.56996	8.71787	10.5716	13.1507	17.0282
105.04	6.57043	8.71991	10.5736	13.1516	17.0283
105.14	6.57091	8.72195	10.5756	13.1526	17.0284
105.24	6.57138	8.72399	10.5776	13.1536	17.0285
105.34	6.57186	8.72603	10.5796	13.1545	17.0287
105.44	6.57233	8.72806	10.5816	13.1555	17.0288
105.54	6.57281	8.73009	10.5836	13.1564	17.0289
105.64	6.57328	8.73212	10.5856	13.1574	17.029
105.74	6.57376	8.73415	10.5875	13.1583	17.0291
105.84	6.57423	8.73617	10.5895	13.1593	17.0292
105.94	6.5747	8.7382	10.5915	13.1602	17.0293
106.04	6.57518	8.74022	10.5935	13.1611	17.0294
106.14	6.57565	8.74223	10.5954	13.1621	17.0295
106.24	6.57612	8.74425	10.5974	13.163	17.0296
106.34	6.5766	8.74626	10.5994	13.1639	17.0297
106.44	6.57707	8.74827	10.6013	13.1649	17.0298
106.54	6.57754	8.75028	10.6033	13.1658	17.0299
106.64	6.57801	8.75229	10.6052	13.1667	17.03
106.74	6.57849	8.75429	10.6072	13.1676	17.0301
106.84	6.57896	8.75629	10.6091	13.1685	17.0302
106.94	6.57943	8.75829	10.611	13.1694	17.0303
107.04	6.5799	8.76029	10.613	13.1703	17.0304
107.14	6.58037	8.76228	10.6149	13.1712	17.0305
107.24	6.58084	8.76427	10.6168	13.1721	17.0306
107.34	6.58131	8.76626	10.6187	13.173	17.0307
107.44	6.58178	8.76825	10.6207	13.1739	17.0308
107.54	6.58225	8.77024	10.6226	13.1748	17.0309
107.64	6.58272	8.77222	10.6245	13.1757	17.031
107.74	6.58319	8.7742	10.6264	13.1766	17.0311
107.84	6.58366	8.77618	10.6283	13.1775	17.0312
107.94	6.58412	8.77816	10.6302	13.1784	17.0313
108.04	6.58459	8.78013	10.6321	13.1792	17.0314
108.14	6.58506	8.7821	10.634	13.1801	17.0315
108.24	6.58553	8.78407	10.6359	13.181	17.0316
108.34	6.586	8.78604	10.6378	13.1819	17.0317
108.44	6.58646	8.78801	10.6397	13.1827	17.0318
108.54	6.58693	8.78997	10.6416	13.1836	17.0319
108.64	6.5874	8.79193	10.6434	13.1845	17.032
108.74	6.58786	8.79389	10.6453	13.1853	17.032
108.84	6.58833	8.79584	10.6472	13.1862	17.0321
108.94	6.5888	8.7978	10.649	13.187	17.0322
109.04	6.58926	8.79975	10.6509	13.1879	17.0323
109.14	6.58973	8.8017	10.6528	13.1887	17.0324
109.24	6.59019	8.80365	10.6546	13.1896	17.0325
109.34	6.59066	8.80559	10.6565	13.1904	17.0326
109.44	6.59112	8.80754	10.6583	13.1913	17.0327
109.54	6.59159	8.80948	10.6602	13.1921	17.0327
109.64	6.59205	8.81142	10.662	13.1929	17.0328
109.74	6.59252	8.81335	10.6639	13.1938	17.0329
109.84	6.59298	8.81529	10.6657	13.1946	17.033
109.94	6.59344	8.81722	10.6675	13.1954	17.0331
110.04	6.59391	8.81915	10.6694	13.1962	17.0332
110.14	6.59437	8.82108	10.6712	13.1971	17.0333
110.24	6.59483	8.823	10.673	13.1979	17.0333
110.34	6.59529	8.82492	10.6748	13.1987	17.0334
110.44	6.59576	8.82685	10.6767	13.1995	17.0335
110.54	6.59622	8.82876	10.6785	13.2003	17.0336
110.64	6.59668	8.83068	10.6803	13.2011	17.0337
110.74	6.59714	8.8326	10.6821	13.2019	17.0337
110.84	6.5976	8.83451	10.6839	13.2027	17.0338
110.94	6.59806	8.83642	10.6857	13.2035	17.0339
111.04	6.59852	8.83833	10.6875	13.2043	17.034
111.14	6.59898	8.84023	10.6893	13.2051	17.0341
111.24	6.59944	8.84214	10.6911	13.2059	17.0341
111.34	6.5999	8.84404	10.6929	13.2067	17.0342
111.44	6.60036	8.84594	10.6947	13.2075	17.0343
111.54	6.60082	8.84783	10.6964	13.2083	17.0344
111.64	6.60128	8.84973	10.6982	13.2091	17.0344
111.74	6.60174	8.85162	10.7	13.2099	17.0345
111.84	6.6022	8.85351	10.7018	13.2106	17.0346
111.94	6.60266	8.8554	10.7035	13.2114	17.0347
112.04	6.60312	8.85729	10.7053	13.2122	17.0347
112.14	6.60358	8.85917	10.7071	13.213	17.0348
112.24	6.60403	8.86105	10.7088	13.2137	17.0349
112.34	6.60449	8.86293	10.7106	13.2145	17.035
112.44	6.60495	8.86481	10.7123	13.2153	17.035
112.54	6.6054	8.86669	10.7141	13.216	17.0351
112.64	6.60586	8.86856	10.7158	13.2168	17.0352
112.74	6.60632	8.87043	10.7176	13.2175	17.0352
112.84	6.60677	8.8723	10.7193	13.2183	17.0353
112.94	6.60723	8.87417	10.7211	13.2191	17.0354
113.04	6.60769	8.87603	10.7228	13.2198	17.0355
113.14	6.60814	8.8779	10.7245	13.2205	17.0355
113.24	6.6086	8.87976	10.7262	13.2213	17.0356
113.34	6.60905	8.88162	10.728	13.222	17.0357
113.44	6.60951	8.88347	10.7297	13.2228	17.0357
113.54	6.60996	8.88533	10.7314	13.2235	17.0358
113.64	6.61041	8.88718	10.7331	13.2242	17.0359
113.74	6.61087	8.88903	10.7348	13.225	17.0359
113.84	6.61132	8.89088	10.7366	13.2257	17.036
113.94	6.61178	8.89272	10.7383	13.2264	17.0361
114.04	6.61223	8.89457	10.74	13.2272	17.0361
114.14	6.61268	8.89641	10.7417	13.2279	17.0362
114.24	6.61313	8.89825	10.7434	13.2286	17.0363
114.34	6.61359	8.90009	10.745	13.2293	17.0363
114.44	6.61404	8.90192	10.7467	13.23	17.0364
114.54	6.61449	8.90376	10.7484	13.2308	17.0365
114.64	6.61494	8.90559	10.7501	13.2315	17.0365
114.74	6.61539	8.90742	10.7518	13.2322	17.0366
114.84	6.61585	8.90924	10.7535	13.2329	17.0367
114.94	6.6163	8.91107	10.7551	13.2336	17.0367
115.04	6.61675	8.91289	10.7568	13.2343	17.0368
115.14	6.6172	8.91471	10.7585	13.235	17.0368
115.24	6.61765	8.91653	10.7602	13.2357	17.0369
115.34	6.6181	8.91835	10.7618	13.2364	17.037
115.44	6.61855	8.92016	10.7635	13.2371	17.037
115.54	6.619	8.92198	10.7651	13.2378	17.0371
115.64	6.61945	8.92379	10.7668	13.2385	17.0371
115.74	6.6199	8.92559	10.7684	13.2392	17.0372
115.84	6.62034	8.9274	10.7701	13.2399	17.0373
115.94	6.62079	8.92921	10.7717	13.2405	17.0373
116.04	6.62124	8.93101	10.7734	13.2412	17.0374
116.14	6.62169	8.93281	10.775	13.2419	17.0374
116.24	6.62214	8.93461	10.7767	13.2426	17.0375
116.34	6.62259	8.9364	10.7783	13.2432	17.0376
116.44	6.62303	8.9382	10.7799	13.2439	17.0376
116.54	6.62348	8.93999	10.7815	13.2446	17.0377
116.64	6.62393	8.94178	10.7832	13.2453	17.0377
116.74	6.62437	8.94357	10.7848	13.2459	17.0378
116.84	6.62482	8.94535	10.7864	13.2466	17.0378
116.94	6.62527	8.94714	10.788	13.2473	17.0379
117.04	6.62571	8.94892	10.7896	13.2479	17.0379
117.14	6.62616	8.9507	10.7912	13.2486	17.038
117.24	6.6266	8.95248	10.7928	13.2492	17.0381
117.34	6.62705	8.95425	10.7945	13.2499	17.0381
117.44	6.62749	8.95603	10.7961	13.2505	17.0382
117.54	6.62794	8.9578	10.7977	13.2512	17.0382
117.64	6.62838	8.95957	10.7992	13.2518	17.0383
117.74	6.62883	8.96134	10.8008	13.2525	17.0383
117.84	6.62927	8.9631	10.8024	13.2531	17.0384
117.94	6.62971	8.96487	10.804	13.2538	17.0384
118.04	6.63016	8.96663	10.8056	13.2544	17.0385
118.14	6.6306	8.96839	10.8072	13.255	17.0385
118.24	6.63104	8.97015	10.8088	13.2557	17.0386
118.34	6.63149	8.9719	10.8103	13.2563	17.0386
118.44	6.63193	8.97365	10.8119	13.2569	17.0387
118.54	6.63237	8.97541	10.8135	13.2576	17.0387
118.64	6.63281	8.97716	10.815	13.2582	17.0388
118.74	6.63325	8.9789	10.8166	13.2588	17.0388
118.84	6.6337	8.98065	10.8182	13.2594	17.0389
118.94	6.63414	8.98239	10.8197	13.2601	17.0389
119.04	6.63458	8.98414	10.8213	13.2607	17.039
119.14	6.63502	8.98588	10.8228	13.2613	17.039
119.24	6.63546	8.98761	10.8244	13.2619	17.0391
119.34	6.6359	8.98935	10.8259	13.2625	17.0391
119.44	6.63634	8.99108	10.8275	13.2631	17.0392
119.54	6.63678	8.99282	10.829	13.2638	17.0392
119.64	6.63722	8.99455	10.8305	13.2644	17.0393
119.74	6.63766	8.99627	10.8321	13.265	17.0393
119.84	6.6381	8.998	10.8336	13.2656	17.0394
119.94	6.63854	8.99972	10.8351	13.2662	17.0394
120.04	6.63898	9.00145	10.8367	13.2668	17.0395
120.14	6.63941	9.00317	10.8382	13.2674	17.0395
120.24	6.63985	9.00488	10.8397	13.268	17.0396
120.34	6.64029	9.0066	10.8412	13.2686	17.0396
120.44	6.64073	9.00831	10.8428	13.2692	17.0396
120.54	6.64116	9.01003	10.8443	13.2697	17.0397
120.64	6.6416	9.01174	10.8458	13.2703	17.0397
120.74	6.64204	9.01345	10.8473	13.2709	17.0398
120.84	6.64248	9.01515	10.8488	13.2715	17.0398
120.94	6.64291	9.01686	10.8503	13.2721	17.0399
121.04	6.64335	9.01856	10.8518	13.2727	17.0399
121.14	6.64378	9.02026	10.8533	13.2733	17.04
121.24	6.64422	9.02196	10.8548	13.2738	17.04
121.34	6.64466	9.02366	10.8563	13.2744	17.04
121.44	6.64509	9.02535	10.8578	13.275	17.0401
121.54	6.64553	9.02704	10.8592	13.2756	17.0401
121.64	6.64596	9.02874	10.8607	13.2761	17.0402
121.74	6.6464	9.03042	10.8622	13.2767	17.0402
121.84	6.64683	9.03211	10.8637	13.2773	17.0403
121.94	6.64726	9.0338	10.8652	13.2778	17.0403
122.04	6.6477	9.03548	10.8666	13.2784	17.0403
122.14	6.64813	9.03716	10.8681	13.279	17.0404
122.24	6.64856	9.03884	10.8696	13.2795	17.0404
122.34	6.649	9.04052	10.871	13.2801	17.0405
122.44	6.64943	9.04219	10.8725	13.2806	17.0405
122.54	6.64986	9.04387	10.874	13.2812	17.0405
122.64	6.6503	9.04554	10.8754	13.2817	17.0406
122.74	6.65073	9.04721	10.8769	13.2823	17.0406
122.84	6.65116	9.04888	10.8783	13.2828	17.0407
122.94	6.65159	9.05054	10.8798	13.2834	17.0407
123.04	6.65202	9.05221	10.8812	13.2839	17.0407
123.14	6.65245	9.05387	10.8827	13.2845	17.0408
123.24	6.65289	9.05553	10.8841	13.285	17.0408
123.34	6.65332	9.05719	10.8855	13.2856	17.0409
123.44	6.65375	9.05885	10.887	13.2861	17.0409
123.54	6.65418	9.0605	10.8884	13.2866	17.0409
123.64	6.65461	9.06216	10.8898	13.2872	17.041
123.74	6.65504	9.06381	10.8913	13.2877	17.041
123.84	6.65547	9.06546	10.8927	13.2882	17.041
123.94	6.6559	9.0671	10.8941	13.2888	17.0411
124.04	6.65633	9.06875	10.8955	13.2893	17.0411
124.14	6.65675	9.07039	10.8969	13.2898	17.0412
124.24	6.65718	9.07203	10.8984	13.2903	17.0412
124.34	6.65761	9.07367	10.8998	13.2909	17.0412
124.44	6.65804	9.07531	10.9012	13.2914	17.0413
124.54	6.65847	9.07695	10.9026	13.2919	17.0413
124.64	6.6589	9.07858	10.904	13.2924	17.0413
124.74	6.65932	9.08021	10.9054	13.2929	17.0414
124.84	6.65975	9.08184	10.9068	13.2935	17.0414
124.94	6.66018	9.08347	10.9082	13.294	17.0414
125.04	6.6606	9.0851	10.9096	13.2945	17.0415
125.14	6.66103	9.08673	10.911	13.295	17.0415
125.24	6.66146	9.08835	10.9124	13.2955	17.0415
125.34	6.66188	9.08997	10.9138	13.296	17.0416
125.44	6.66231	9.09159	10.9151	13.2965	17.0416
125.54	6.66274	9.09321	10.9165	13.297	17.0416
125.64	6.66316	9.09482	10.9179	13.2975	17.0417
125.74	6.66359	9.09644	10.9193	13.298	17.0417
125.84	6.66401	9.09805	10.9207	13.2985	17.0417
125.94	6.66444	9.09966	10.922	13.299	17.0418
126.04	6.66486	9.10127	10.9234	13.2995	17.0418
126.14	6.66528	9.10287	10.9248	13.3	17.0418
126.24	6.66571	9.10448	10.9261	13.3005	17.0419
126.34	6.66613	9.10608	10.9275	13.301	17.0419
126.44	6.66656	9.10768	10.9288	13.3015	17.0419
126.54	6.66698	9.10928	10.9302	13.302	17.042
126.64	6.6674	9.11088	10.9316	13.3025	17.042
126.74	6.66783	9.11247	10.9329	13.3029	17.042
126.84	6.66825	9.11407	10.9343	13.3034	17.0421
126.94	6.66867	9.11566	10.9356	13.3039	17.0421
127.04	6.66909	9.11725	10.937	13.3044	17.0421
127.14	6.66951	9.11884	10.9383	13.3049	17.0422
127.24	6.66994	9.12043	10.9396	13.3054	17.0422
127.34	6.67036	9.12201	10.941	13.3058	17.0422
127.44	6.67078	9.12359	10.9423	13.3063	17.0422
127.54	6.6712	9.12517	10.9436	13.3068	17.0423
127.64	6.67162	9.12675	10.945	13.3072	17.0423
127.74	6.67204	9.12833	10.9463	13.3077	17.0423
127.84	6.67246	9.12991	10.9476	13.3082	17.0424
127.94	6.67288	9.13148	10.9489	13.3087	17.0424
128.04	6.6733	9.13305	10.9503	13.3091	17.0424
128.14	6.67372	9.13462	10.9516	13.3096	17.0424
128.24	6.67414	9.13619	10.9529	13.31	17.0425
128.34	6.67456	9.13776	10.9542	13.3105	17.0425
128.44	6.67498	9.13932	10.9555	13.311	17.0425
128.54	6.6754	9.14089	10.9568	13.3114	17.0426
128.64	6.67582	9.14245	10.9581	13.3119	17.0426
128.74	6.67624	9.14401	10.9594	13.3123	17.0426
128.84	6.67665	9.14557	10.9607	13.3128	17.0426
128.94	6.67707	9.14712	10.962	13.3132	17.0427
129.04	6.67749	9.14868	10.9633	13.3137	17.0427
129.14	6.67791	9.15023	10.9646	13.3141	17.0427
129.24	6.67832	9.15178	10.9659	13.3146	17.0428
129.34	6.67874	9.15333	10.9672	13.315	17.0428
129.44	6.67916	9.15488	10.9685	13.3155	17.0428
129.54	6.67957	9.15642	10.9698	13.3159	17.0428
129.64	6.67999	9.15797	10.9711	13.3164	17.0429
129.74	6.68041	9.15951	10.9724	13.3168	17.0429
129.84	6.68082	9.16105	10.9736	13.3173	17.0429
129.94	6.68124	9.16259	10.9749	13.3177	17.0429
130.04	6.68165	9.16413	10.9762	13.3181	17.043
130.14	6.68207	9.16566	10.9774	13.3186	17.043
130.24	6.68248	9.16719	10.9787	13.319	17.043
130.34	6.6829	9.16872	10.98	13.3194	17.043
130.44	6.68331	9.17025	10.9812	13.3199	17.0431
130.54	6.68373	9.17178	10.9825	13.3203	17.0431
130.64	6.68414	9.17331	10.9838	13.3207	17.0431
130.74	6.68455	9.17483	10.985	13.3212	17.0431
130.84	6.68497	9.17636	10.9863	13.3216	17.0432
130.94	6.68538	9.17788	10.9875	13.322	17.0432
131.04	6.68579	9.1794	10.9888	13.3224	17.0432
131.14	6.68621	9.18091	10.99	13.3228	17.0432
131.24	6.68662	9.18243	10.9913	13.3233	17.0433
131.34	6.68703	9.18395	10.9925	13.3237	17.0433
131.44	6.68744	9.18546	10.9938	13.3241	17.0433
131.54	6.68786	9.18697	10.995	13.3245	17.0433
131.64	6.68827	9.18848	10.9962	13.3249	17.0434
131.74	6.68868	9.18998	10.9975	13.3254	17.0434
131.84	6.68909	9.19149	10.9987	13.3258	17.0434
131.94	6.6895	9.19299	10.9999	13.3262	17.0434
132.04	6.68991	9.1945	11.0012	13.3266	17.0434
132.14	6.69032	9.196	11.0024	13.327	17.0435
132.24	6.69073	9.1975	11.0036	13.3274	17.0435
132.34	6.69114	9.19899	11.0048	13.3278	17.0435
132.44	6.69155	9.20049	11.0061	13.3282	17.0435
132.54	6.69196	9.20198	11.0073	13.3286	17.0436
132.64	6.69237	9.20347	11.0085	13.329	17.0436
132.74	6.69278	9.20496	11.0097	13.3294	17.0436
132.84	6.69319	9.20645	11.0109	13.3298	17.0436
132.94	6.6936	9.20794	11.0121	13.3302	17.0436
133.04	6.69401	9.20942	11.0133	13.3306	17.0437
133.14	6.69442	9.21091	11.0145	13.331	17.0437
133.24	6.69483	9.21239	11.0157	13.3314	17.0437
133.34	6.69523	9.21387	11.0169	13.3318	17.0437
133.44	6.69564	9.21535	11.0181	13.3322	17.0438
133.54	6.69605	9.21683	11.0193	13.3326	17.0438
133.64	6.69646	9.2183	11.0205	13.333	17.0438
133.74	6.69686	9.21977	11.0217	13.3334	17.0438
133.84	6.69727	9.22125	11.0229	13.3338	17.0438
133.94	6.69768	9.22272	11.0241	13.3341	17.0439
134.04	6.69808	9.22418	11.0253	13.3345	17.0439
134.14	6.69849	9.22565	11.0264	13.3349	17.0439
134.24	6.6989	9.22712	11.0276	13.3353	17.0439
134.34	6.6993	9.22858	11.0288	13.3357	17.0439
134.44	6.69971	9.23004	11.03	13.3361	17.044
134.54	6.70011	9.2315	11.0311	13.3364	17.044
134.64	6.70052	9.23296	11.0323	13.3368	17.044
134.74	6.70092	9.23442	11.0335	13.3372	17.044
134.84	6.70133	9.23587	11.0347	13.3376	17.044
134.94	6.70173	9.23732	11.0358	13.3379	17.0441
135.04	6.70213	9.23878	11.037	13.3383	17.0441
135.14	6.70254	9.24023	11.0381	13.3387	17.0441
135.24	6.70294	9.24167	11.0393	13.339	17.0441
135.34	6.70335	9.24312	11.0405	13.3394	17.0441
135.44	6.70375	9.24457	11.0416	13.3398	17.0441
135.54	6.70415	9.24601	11.0428	13.3402	17.0442
135.64	6.70456	9.24745	11.0439	13.3405	17.0442
135.74	6.70496	9.24889	11.0451	13.3409	17.0442
135.84	6.70536	9.25033	11.0462	13.3412	17.0442
135.94	6.70576	9.25177	11.0474	13.3416	17.0442
136.04	6.70616	9.2532	11.0485	13.342	17.0443
136.14	6.70657	9.25464	11.0496	13.3423	17.0443
136.24	6.70697	9.25607	11.0508	13.3427	17.0443
136.34	6.70737	9.2575	11.0519	13.343	17.0443
136.44	6.70777	9.25893	11.053	13.3434	17.0443
136.54	6.70817	9.26036	11.0542	13.3438	17.0443
136.64	6.70857	9.26178	11.0553	13.3441	17.0444
136.74	6.70897	9.26321	11.0564	13.3445	17.0444
136.84	6.70937	9.26463	11.0576	13.3448	17.0444
136.94	6.70977	9.26605	11.0587	13.3452	17.0444
137.04	6.71017	9.26747	11.0598	13.3455	17.0444
137.14	6.71057	9.26888	11.0609	13.3459	17.0445
137.24	6.71097	9.2703	11.062	13.3462	17.0445
137.34	6.71137	9.27171	11.0632	13.3466	17.0445
137.44	6.71177	9.27313	11.0643	13.3469	17.0445
137.54	6.71217	9.27454	11.0654	13.3473	17.0445
137.64	6.71257	9.27595	11.0665	13.3476	17.0445
137.74	6.71296	9.27736	11.0676	13.3479	17.0446
137.84	6.71336	9.27876	11.0687	13.3483	17.0446
137.94	6.71376	9.28017	11.0698	13.3486	17.0446
138.04	6.71416	9.28157	11.0709	13.349	17.0446
138.14	6.71456	9.28297	11.072	13.3493	17.0446
138.24	6.71495	9.28437	11.0731	13.3496	17.0446
138.34	6.71535	9.28577	11.0742	13.35	17.0446
138.44	6.71575	9.28717	11.0753	13.3503	17.0447
138.54	6.71614	9.28856	11.0764	13.3506	17.0447
138.64	6.71654	9.28995	11.0775	13.351	17.0447
138.74	6.71694	9.29135	11.0786	13.3513	17.0447
138.84	6.71733	9.29274	11.0796	13.3516	17.0447
138.94	6.71773	9.29412	11.0807	13.352	17.0447
139.04	6.71812	9.29551	11.0818	13.3523	17.0448
139.14	6.71852	9.2969	11.0829	13.3526	17.0448
139.24	6.71891	9.29828	11.084	13.3529	17.0448
139.34	6.71931	9.29966	11.085	13.3533	17.0448
139.44	6.7197	9.30104	11.0861	13.3536	17.0448
139.54	6.7201	9.30242	11.0872	13.3539	17.0448
139.64	6.72049	9.3038	11.0882	13.3542	17.0448
139.74	6.72089	9.30518	11.0893	13.3546	17.0449
[truncated: 2,203 more rows]
