# Supplementary material for: Targeted protein degradation by KLHDC2 ligands identified by high-throughput screening
Source: eLife. 2025 Jun 16;14:RP106844. doi: 10.7554/eLife.106844 (PMC12169847; doi:10.7554/eLife.106844)
Supplement: Figure 3—source data 1. [file elife-106844-fig3-data1.xlsx]

## Sheet: Figure 3A
compound ID	20,000	10,000	5,000	2,500	1,250	625	313	156	78	39	20
8017-2796	2.174	45.3333	87.7333	92.2333	101.4	98.1667	99	97.9667	100.2	95.8667	101
8017-2967	4.03767	38.0667	69.1333	101	98.8333	99.7	107.533	104.233	103.167	101.3	98.9
8017-2971	31.4667	79.4	90.3	87.8	100	95.1667	107.633	97.8333	100	91.6	100.5
8017-3007	41.4333	66.1667	100.867	91	98.0667	103.167	100.433	97.5333	96.6	97.8333	100
8009-7340	48.1667	68.4667	95.6	99.5333	100	100	98.7	100.667	104.067	100	94
8017-2968	55.7667	79.5	89.0667	95.4333	99.5333	103.667	104.333	96.1333	91.3667	91.4667	103.3
8017-3014	39.5667	84.0333	92.2	108.233	93.9333	104.667	98.6	94.7667	101.7	100.1	97.2333
8017-2790	33.8333	91.5333	93.8667	90.4667	100.867	108.667	98.4	95.6333	105.333	101.667	96.4333
Y021-8423	71.8	79.6333	88.6333	87.2333	95.2	106	101.6	94.8	104.333	94.9667	94.6333
8017-2969	44.4333	79.4333	97.3333	100	104.867	103.467	103.6	103.667	93.5333	106	103.667
8017-2793	92.2667	76.3333	91.8333	94.3667	99.6	95.4	99.1667	103.3	92.8333	98.6333	99.4667
8017-5348	92.8667	100.133	83.2	97.2667	100.367	99.5333	95.5333	93.9667	97.5667	90.8	99.5333
8017-2977	50.8	89.4	97.5667	109.333	100.733	100.3	101.3	108.933	97.9667	96.0667	102.567
8017-2856	81.9667	88.2333	96.5667	96.8333	95.9	100.3	99.8	102.233	100.333	94.3	107.333
8017-2983	100.933	95.9	95.8333	95.6667	98.7333	91.5667	99.5333	103.867	97.8667	96.1	91.6333
4597-0013	92.0667	96.3	96.8667	96.9667	99.5	103.867	94.8333	97.7333	92.4333	100.433	99.9
8017-2858	71.2	93.7	100.867	103.333	100.167	100.433	102.7	103.167	97.6	106.367	96.0667
1959-0158	82.5	96.8333	96.4	90.5667	94.7333	101.933	106	97.8333	108.667	100.867	100.1
8017-2960	89.1	96.4667	89.3667	105.667	103.7	98.9333	100.1	97.9	102.5	95.7667	100.7
8017-2976	67.4	94.5	102	102.8	100.1	105.6	101.533	101.667	108.667	100.7	99.9333
8017-2975	89.2	98	99.0667	97.4667	103.667	102.933	97.5333	100.667	97.7333	95.0667	105.667
8017-2401	98.1333	101.933	96.1667	105.333	99.8	94.9	100.467	102.133	95.6333	99.3	93.2667
8010-3215	94.8	91.3333	107.667	99.1333	101.133	98.6333	99.3667	100.633	99.7	98.3667	98.1333
8017-2857	91.2333	102.067	97.6333	96.8	101.133	102.067	95.3667	100.933	96.5667	108.533	96.9333
D034-0029	92.4333	95.3	100	97.4333	107.333	98.0667	99.5	99.9667	100	94.6667	104.567
Y021-0770	100.3	95.7	100.967	102.733	105.433	91.3333	94.6667	99.5	98.5667	100.967	99.3667
D034-0038	94.6333	107.667	100	105.6	103.333	96.0667	98.6	104.067	98.0333	93.6667	88.2
8017-5347	106.333	103.7	93.4667	98.3	94.2	109.333	98.2667	100.667	97.3333	91.2333	98.2333
8017-2958	94.0333	95.6	101.7	107	95.7667	93.3333	102.3	103.333	104.333	99.0667	96.5667
8017-2972	79.6	98.7667	94.1333	105.333	98.0333	105.167	106.2	100.2	100.033	101.9	107
8017-2859	88.8667	104.667	101.067	98.3667	99.3333	95.8667	101.233	104.467	98.8667	100	104.7
8017-2973	100	100	100	100	104.833	102.533	100	104.933	96.7	92.1	97.4667
4597-0011	97.1333	93.6	95.8333	104.867	99.2333	94.6333	101.7	105.967	104.333	103	99.7
Y021-2351	99.9	98.8333	97.9333	97.4667	103.3	107.033	99.1333	98.1333	100.733	98.1333	99.6667
8017-2797	95.5333	108.733	100.867	104.7	98.4667	106.3	94.7	100.733	97.1	103	90.5333
8017-2959	101.5	95.6667	96.2333	96.4333	105.667	97.6667	100	99	103.767	102.8	103.8
D034-0013	105.6	102.867	103.467	95.4333	95.2	104.667	100.933	100	93.9333	94.2	106.333
6177-0424	90.6	102.7	98.8333	95.6667	105.467	95.8	109	99.0333	104.933	101.233	100.267
Y021-8425	100	100	100	106.367	102.667	104.967	103.733	104	92.5	96.0667	95.2667
D034-0055	103.667	100	104	94.7333	97.2333	102.667	104.2	103.467	103.933	96.7667	94.9333
6177-0422	93.6333	101.033	98.2	106.333	90.0667	100	106.333	109.667	102.867	100	98.3
D034-0010	98.0667	100.467	98.8667	97.3	104.833	105	100	104.433	97.8333	107.667	98.8333
8010-3219	103.2	99.6667	103.567	105.6	96.0667	95.5333	106.333	98.5667	99.8667	100	100
8017-2860	78.7333	92.1333	108	104.6	105.233	107	107	101.867	106	103.333	104.867
Y021-0902	100.733	100.367	99.7667	96.9333	104.167	96	101	109	103.267	105	104
8017-2974	93.1333	95.2	102.667	100	103.967	109	103.9	105.667	109	99.9	102.933
D034-0002	108.633	103.167	100.033	96.2333	100	103.5	105.7	101.933	103.2	103.467	100.567
D034-0008	100	103.767	100	105.3	104.467	102.933	101.967	108.333	101.667	96.1667	102.2
Y021-0769	100.633	97.8667	102.967	107.667	101	105.467	101.967	104.467	104.067	100.567	101.833
Y021-7166	105.233	98.1	103.567	106.3	103.4	100.467	105.933	100	98.2667	98.4333	109.667
6177-0419	102.233	105	105.333	101.933	100.967	109	107.2	94.4333	101.1	100.833	101.4
D034-0015	94.6333	105.5	108	102.767	102.867	104.167	100	103.267	104.633	101.067	108
8010-3210	104.333	106	96.3333	106	105.333	103.667	108.333	105.667	96.2	108	95.0667
D034-0063	97.5333	104.2	108.067	97.5333	104.233	105.667	105.9	108.033	108	105.167	102.533

## Sheet: Figure 3D
nM	KLHDC2			KEAP1
10000	-84.4	-101.233	-107.845	31	14	27
3333.33	-93.4	-88.4	-82.2	15	26	34
1111.11	-67.8	-66.2	-52.8	25	23	18
370.37	-30.6	-31	-24.7	31	22	25
123.457	0	-2.6	-8.8	20	35	31
41.1523	1	-1.4	-5.1	20	18	26
13.7174	1	-4	0	24	24	27
4.57247	1	1	-8.1	16	24	43
1.52416	-1.4	2	0	29	21	41
0.508053	-11.1	-2.3	1	22	20	32
0.169351	-4	1	6	20	24	25

## Sheet: Figure 3E
nM	KLHDC2			KEAP1
10000	-35.8	-29.2	-28.4	23	26	17
3333.33	-35	-31	-24.9	15	23	32
1111.11	-27.6	-23.4	-22.7	21	16	26
370.37	-3	-4	-3.2	25	12	20
123.457	3	-0.6	-1.9	18	24	30
41.1523	-3.9	9	-3.8	29	24	17
13.7174	5	7	-3.9	20	23	18
4.57247	-7.5	2	15	22	15	21
1.52416	-2.3	-0.9	-4	13	22	29
0.508053	-1.9	5	16	18	23	21
0.169351	-1.9	-3.9	4	16	15	25

## Sheet: Figure 3F
time s	313 nM	625 nM	1250 nM	2500 nM	5000 nM	10000 nM
-60.06	-0.280029	-0.552734	-0.196533	-0.504639	-0.616461	-0.64234
-59.96	-0.279297	-0.52002	-0.152832	-0.52832	-0.604744	-0.635261
-59.86	-0.283936	-0.469238	-0.172363	-0.530518	-0.607914	-0.64307
-59.76	-0.289551	-0.398193	-0.338867	-0.532959	-0.63282	-0.659431
-59.66	-0.283936	-0.317627	-0.541016	-0.518066	-0.639163	-0.645511
-59.56	-0.307373	-0.23877	-0.641846	-0.53833	-0.541511	-0.561043
-59.46	-0.313721	-0.141113	-0.656738	-0.549316	-0.407967	-0.415047
-59.36	-0.255127	-0.043457	-0.502197	-0.458008	-0.332031	-0.33374
-59.26	-0.244873	-0.0683594	-0.366943	-0.448486	-0.271971	-0.287596
-59.16	-0.227783	-0.114502	-0.288818	-0.423584	-0.239988	-0.270506
-59.06	-0.205078	-0.149658	-0.258301	-0.39624	-0.254633	-0.289057
-58.96	-0.208984	-0.189453	-0.253662	-0.397705	-0.289058	-0.324214
-58.86	-0.193359	-0.205078	-0.251953	-0.385986	-0.342283	-0.3728
-58.76	-0.209717	-0.250488	-0.292725	-0.412598	-0.367917	-0.393796
-58.66	-0.224609	-0.259766	-0.306641	-0.424316	-0.374267	-0.39624
-58.56	-0.228516	-0.259033	-0.312988	-0.419678	-0.372802	-0.412596
-58.46	-0.235596	-0.259033	-0.311523	-0.424316	-0.374999	-0.415771
-58.36	-0.231689	-0.262207	-0.309082	-0.424316	-0.385253	-0.417236
-58.26	-0.233154	-0.266846	-0.304443	-0.419678	-0.382812	-0.417236
-58.16	-0.233154	-0.271484	-0.298828	-0.414063	-0.389892	-0.419677
-58.06	-0.246582	-0.27002	-0.307617	-0.415039	-0.370362	-0.39624
-57.96	-0.233887	-0.262939	-0.298096	-0.409424	-0.354003	-0.393066
-57.86	-0.231689	-0.259766	-0.297363	-0.404785	-0.348389	-0.385986
-57.76	-0.221436	-0.271484	-0.287109	-0.401611	-0.343018	-0.385254
-57.66	-0.196533	-0.266113	-0.288818	-0.381348	-0.350098	-0.393066
-57.56	-0.173096	-0.259033	-0.2771	-0.375977	-0.33374	-0.404785
-57.46	-0.155029	-0.249756	-0.265381	-0.361084	-0.311768	-0.404785
-57.36	-0.134033	-0.235596	-0.258301	-0.334473	-0.292236	-0.404785
-57.26	-0.138672	-0.247314	-0.258301	-0.314941	-0.277344	-0.404785
-57.16	-0.134033	-0.239502	-0.262939	-0.29541	-0.256348	-0.396241
-57.06	-0.107422	-0.212891	-0.27002	-0.268799	-0.258545	-0.385986
-56.96	-0.100342	-0.208252	-0.266846	-0.271973	-0.275878	-0.376708
-56.86	-0.107422	-0.203613	-0.260742	-0.286865	-0.28833	-0.366455
-56.76	-0.115234	-0.197998	-0.255127	-0.307861	-0.303222	-0.360351
-56.66	-0.137939	-0.206787	-0.250488	-0.322754	-0.301514	-0.351563
-56.56	-0.144043	-0.201172	-0.242676	-0.331299	-0.31494	-0.373534
-56.46	-0.166016	-0.220703	-0.250488	-0.346191	-0.33203	-0.393065
-56.36	-0.197266	-0.247314	-0.277832	-0.365723	-0.355468	-0.409423
-56.26	-0.213623	-0.263672	-0.291016	-0.385254	-0.346192	-0.400147
-56.16	-0.20752	-0.249756	-0.272461	-0.368896	-0.35083	-0.404053
-56.06	-0.205078	-0.235596	-0.262939	-0.361816	-0.355468	-0.41333
-55.96	-0.206543	-0.251953	-0.274658	-0.366455	-0.365722	-0.417236
-55.86	-0.208984	-0.259033	-0.281738	-0.373535	-0.370361	-0.412598
-55.76	-0.208984	-0.263672	-0.281738	-0.373535	-0.359376	-0.400147
-55.66	-0.201172	-0.270752	-0.288818	-0.365723	-0.345459	-0.388428
-55.56	-0.196533	-0.266113	-0.288818	-0.372803	-0.331299	-0.381348
-55.46	-0.200439	-0.259033	-0.281738	-0.362549	-0.335937	-0.390625
-55.36	-0.209717	-0.259033	-0.283203	-0.35791	-0.335938	-0.404785
-55.26	-0.205078	-0.247314	-0.281738	-0.346191	-0.35083	-0.404785
-55.16	-0.205078	-0.247314	-0.2771	-0.346191	-0.35083	-0.404785
-55.06	-0.201904	-0.242676	-0.274658	-0.35083	-0.354004	-0.404785
-54.96	-0.208984	-0.251953	-0.281738	-0.35791	-0.358643	-0.404785
-54.86	-0.208984	-0.259033	-0.281738	-0.361084	-0.370361	-0.404785
-54.76	-0.208984	-0.259033	-0.281738	-0.373535	-0.358643	-0.393067
-54.66	-0.197266	-0.247314	-0.27002	-0.358643	-0.355469	-0.393066
-54.56	-0.197266	-0.247314	-0.27002	-0.354004	-0.354004	-0.404052
-54.46	-0.200439	-0.250488	-0.284912	-0.357178	-0.358642	-0.408691
-54.36	-0.205078	-0.255127	-0.292725	-0.373535	-0.35083	-0.400879
-54.26	-0.208984	-0.247314	-0.289551	-0.361084	-0.370361	-0.405517
-54.16	-0.213623	-0.259766	-0.294189	-0.358643	-0.38208	-0.412597
-54.06	-0.223877	-0.266846	-0.30127	-0.370361	-0.38208	-0.42749
-53.96	-0.228516	-0.266846	-0.30127	-0.377441	-0.38208	-0.432129
-53.86	-0.228516	-0.278564	-0.30127	-0.377441	-0.377442	-0.42749
-53.76	-0.228516	-0.278564	-0.296631	-0.383789	-0.378174	-0.420411
-53.66	-0.219971	-0.278564	-0.297363	-0.381348	-0.366456	-0.405518
-53.56	-0.212891	-0.266846	-0.285645	-0.369629	-0.363281	-0.397705
-53.46	-0.209717	-0.263672	-0.287109	-0.366455	-0.358643	-0.400879
-53.36	-0.205078	-0.266846	-0.30127	-0.373535	-0.358643	-0.400879
-53.26	-0.216797	-0.266846	-0.30127	-0.373535	-0.370361	-0.400879
-53.16	-0.221436	-0.266846	-0.296631	-0.373535	-0.365723	-0.407959
-53.06	-0.223877	-0.262207	-0.284912	-0.368896	-0.367187	-0.407959
-52.96	-0.228516	-0.273926	-0.289551	-0.370361	-0.362549	-0.400879
-52.86	-0.223877	-0.266846	-0.289551	-0.365723	-0.362549	-0.400879
-52.76	-0.224609	-0.266846	-0.289551	-0.365723	-0.359375	-0.397705
-52.66	-0.221436	-0.263672	-0.291016	-0.374268	-0.343018	-0.381348
-52.56	-0.205078	-0.247314	-0.27002	-0.35791	-0.343018	-0.393066
-52.46	-0.205078	-0.247314	-0.27002	-0.35791	-0.341552	-0.39624
-52.36	-0.208252	-0.24585	-0.273193	-0.361084	-0.339111	-0.400879
-52.26	-0.212891	-0.255127	-0.289551	-0.361084	-0.339111	-0.408691
-52.16	-0.212891	-0.255127	-0.284912	-0.361816	-0.339112	-0.400879
-52.06	-0.213623	-0.247314	-0.27002	-0.354004	-0.339111	-0.397705
-51.96	-0.208984	-0.247314	-0.27002	-0.354004	-0.339111	-0.393066
-51.86	-0.208984	-0.255127	-0.27002	-0.354004	-0.339111	-0.393066
-51.76	-0.208984	-0.255127	-0.27002	-0.354004	-0.339111	-0.393066
-51.66	-0.208984	-0.255127	-0.27002	-0.354004	-0.332031	-0.385987
-51.56	-0.201904	-0.244873	-0.262939	-0.346924	-0.350829	-0.393066
-51.46	-0.208984	-0.247314	-0.27002	-0.354004	-0.347656	-0.400146
-51.36	-0.216797	-0.247314	-0.281738	-0.354004	-0.343018	-0.393066
-51.26	-0.216797	-0.259033	-0.281738	-0.365723	-0.3313	-0.381348
-51.16	-0.200439	-0.247314	-0.27002	-0.354004	-0.331299	-0.381348
-51.06	-0.205078	-0.247314	-0.27002	-0.349365	-0.331299	-0.381348
-50.96	-0.205078	-0.247314	-0.265381	-0.342285	-0.323487	-0.381348
-50.86	-0.197266	-0.239502	-0.258301	-0.334473	-0.318848	-0.381348
-50.76	-0.197266	-0.239502	-0.258301	-0.334473	-0.322754	-0.384521
-50.66	-0.200439	-0.250488	-0.261475	-0.337646	-0.327392	-0.38916
-50.56	-0.205078	-0.250488	-0.266113	-0.342285	-0.327393	-0.38916
-50.46	-0.205078	-0.243408	-0.266113	-0.350098	-0.332031	-0.38916
-50.36	-0.205078	-0.243408	-0.262939	-0.350098	-0.327393	-0.377442
-50.26	-0.201172	-0.231689	-0.258301	-0.338379	-0.332031	-0.398437
-50.16	-0.205811	-0.244873	-0.262939	-0.343018	-0.35083	-0.412597
-50.06	-0.212891	-0.247314	-0.27002	-0.350098	-0.343018	-0.400147
-49.96	-0.201904	-0.242676	-0.262207	-0.346924	-0.343018	-0.393066
-49.86	-0.197266	-0.247314	-0.262207	-0.354004	-0.338379	-0.393066
-49.76	-0.208984	-0.247314	-0.265381	-0.354004	-0.331299	-0.393066
-49.66	-0.208984	-0.247314	-0.277832	-0.354004	-0.331299	-0.393066
-49.56	-0.208984	-0.247314	-0.277832	-0.349365	-0.331299	-0.389893
-49.46	-0.208984	-0.247314	-0.277832	-0.354004	-0.3313	-0.381349
-49.36	-0.200439	-0.243408	-0.266113	-0.342285	-0.335937	-0.385986
-49.26	-0.209717	-0.244873	-0.270752	-0.346924	-0.338378	-0.388427
-49.16	-0.216797	-0.247314	-0.274658	-0.35083	-0.339111	-0.393066
-49.06	-0.216797	-0.247314	-0.27002	-0.346191	-0.339111	-0.393066
-48.96	-0.228516	-0.247314	-0.281738	-0.346191	-0.334473	-0.388428
-48.86	-0.223877	-0.254395	-0.2771	-0.341553	-0.339111	-0.393066
-48.76	-0.228516	-0.259033	-0.281738	-0.354004	-0.335938	-0.393066
-48.66	-0.228516	-0.259033	-0.2771	-0.354004	-0.331299	-0.393066
-48.56	-0.225342	-0.254395	-0.27002	-0.354004	-0.319581	-0.37671
-48.46	-0.216797	-0.235596	-0.266113	-0.337646	-0.331299	-0.38208
-48.36	-0.216797	-0.235596	-0.266113	-0.342285	-0.331299	-0.38916
-48.26	-0.216797	-0.247314	-0.266113	-0.342285	-0.331299	-0.38916
-48.16	-0.216797	-0.247314	-0.266113	-0.342285	-0.323487	-0.381348
-48.06	-0.208984	-0.239502	-0.258301	-0.334473	-0.328125	-0.389893
-47.96	-0.212891	-0.244141	-0.266846	-0.331299	-0.323487	-0.380616
-47.86	-0.201172	-0.236328	-0.262207	-0.32666	-0.32666	-0.376709
-47.76	-0.204346	-0.234863	-0.265381	-0.329834	-0.319581	-0.36963
-47.66	-0.197266	-0.227783	-0.258301	-0.322754	-0.314941	-0.378174
-47.56	-0.197266	-0.230957	-0.258301	-0.334473	-0.307861	-0.373535
-47.46	-0.197266	-0.232422	-0.258301	-0.334473	-0.31958	-0.373535
-47.36	-0.205078	-0.227783	-0.258301	-0.331299	-0.307862	-0.369629
-47.26	-0.193359	-0.216064	-0.254395	-0.314941	-0.307861	-0.369629
-47.16	-0.193359	-0.227783	-0.254395	-0.314941	-0.304688	-0.366455
-47.06	-0.190186	-0.224609	-0.248047	-0.31958	-0.311767	-0.373535
-46.96	-0.208984	-0.227051	-0.250488	-0.32666	-0.308594	-0.373535
-46.86	-0.208984	-0.219971	-0.262207	-0.32666	-0.303955	-0.373535
-46.76	-0.208984	-0.227783	-0.262207	-0.32666	-0.311768	-0.373535
-46.66	-0.208984	-0.227783	-0.262207	-0.32666	-0.303223	-0.364991
-46.56	-0.200439	-0.219238	-0.253662	-0.318115	-0.307861	-0.369629
-46.46	-0.205078	-0.223877	-0.258301	-0.322754	-0.311035	-0.381348
-46.36	-0.212891	-0.223877	-0.253662	-0.322754	-0.31958	-0.373536
-46.26	-0.201904	-0.216064	-0.23877	-0.32666	-0.31958	-0.373535
-46.16	-0.197266	-0.216064	-0.250488	-0.32666	-0.31958	-0.373535
-46.06	-0.197266	-0.216064	-0.250488	-0.32666	-0.31958	-0.373535
-45.96	-0.197266	-0.227783	-0.255127	-0.32666	-0.316406	-0.373535
-45.86	-0.208984	-0.227783	-0.262207	-0.32666	-0.300049	-0.361817
-45.76	-0.197266	-0.216064	-0.250488	-0.322754	-0.307861	-0.357178
-45.66	-0.197266	-0.216064	-0.258301	-0.322754	-0.307861	-0.350098
-45.56	-0.197266	-0.216064	-0.258301	-0.322754	-0.307861	-0.35791
-45.46	-0.197266	-0.216064	-0.258301	-0.322754	-0.300049	-0.350098
-45.36	-0.189453	-0.208252	-0.24585	-0.314941	-0.300049	-0.354736
-45.26	-0.205811	-0.220703	-0.243408	-0.314941	-0.311767	-0.361816
-45.16	-0.212891	-0.224609	-0.250488	-0.314941	-0.300049	-0.346924
-45.06	-0.201172	-0.208252	-0.23877	-0.314941	-0.300049	-0.354004
-44.96	-0.201172	-0.208252	-0.250488	-0.314941	-0.300049	-0.357178
-44.86	-0.201172	-0.203613	-0.250488	-0.314941	-0.300049	-0.361816
-44.76	-0.208984	-0.208252	-0.250488	-0.314941	-0.300049	-0.361816
-44.66	-0.208984	-0.208252	-0.250488	-0.314941	-0.303955	-0.354004
-44.56	-0.201172	-0.200439	-0.250488	-0.307129	-0.308594	-0.354004
-44.46	-0.196533	-0.200439	-0.247314	-0.307129	-0.311035	-0.35083
-44.36	-0.189453	-0.200439	-0.242676	-0.314941	-0.292237	-0.334473
-44.26	-0.177734	-0.196533	-0.230957	-0.303223	-0.292236	-0.342285
-44.16	-0.177734	-0.196533	-0.24585	-0.303223	-0.300049	-0.342285
-44.06	-0.177734	-0.196533	-0.250488	-0.303223	-0.300049	-0.342285
-43.96	-0.189453	-0.196533	-0.250488	-0.303223	-0.300049	-0.342285
-43.86	-0.189453	-0.196533	-0.250488	-0.314941	-0.288331	-0.330567
-43.76	-0.177734	-0.184814	-0.23877	-0.303223	-0.291504	-0.345459
-43.66	-0.188721	-0.199707	-0.241943	-0.306396	-0.296142	-0.350098
-43.56	-0.197998	-0.204346	-0.243408	-0.311035	-0.288331	-0.342286
-43.46	-0.197266	-0.196533	-0.230957	-0.303223	-0.300049	-0.342285
-43.36	-0.197266	-0.196533	-0.23877	-0.303223	-0.300049	-0.342285
-43.26	-0.197266	-0.196533	-0.23877	-0.303223	-0.304687	-0.346923
-43.16	-0.197266	-0.201172	-0.243408	-0.307861	-0.300049	-0.342285
-43.06	-0.185547	-0.196533	-0.23877	-0.311035	-0.300049	-0.342285
-42.96	-0.185547	-0.208252	-0.23877	-0.311035	-0.300049	-0.342285
-42.86	-0.185547	-0.208252	-0.23877	-0.311035	-0.300049	-0.354004
-42.76	-0.197266	-0.208252	-0.250488	-0.311035	-0.292237	-0.346192
-42.66	-0.194092	-0.200439	-0.242676	-0.300049	-0.300049	-0.346191
-42.56	-0.201172	-0.208252	-0.242676	-0.29541	-0.300049	-0.346191
-42.46	-0.196533	-0.208252	-0.242676	-0.29541	-0.300049	-0.349365
-42.36	-0.189453	-0.208252	-0.242676	-0.307129	-0.288331	-0.350098
-42.26	-0.177734	-0.196533	-0.230957	-0.298584	-0.28833	-0.350098
-42.16	-0.177734	-0.196533	-0.230957	-0.300049	-0.28833	-0.350098
-42.06	-0.177734	-0.196533	-0.230957	-0.29541	-0.28833	-0.350098
-41.96	-0.177734	-0.196533	-0.234131	-0.298584	-0.280518	-0.342286
-41.86	-0.177734	-0.188721	-0.242676	-0.29541	-0.29541	-0.345459
-41.76	-0.180908	-0.191895	-0.24585	-0.298584	-0.301514	-0.346924
-41.66	-0.182373	-0.205078	-0.247314	-0.300049	-0.307129	-0.345459
-41.56	-0.180908	-0.203613	-0.24585	-0.298584	-0.300049	-0.343018
-41.46	-0.173828	-0.196533	-0.23877	-0.291504	-0.300049	-0.361816
-41.36	-0.185547	-0.196533	-0.246582	-0.303223	-0.296875	-0.358643
-41.26	-0.187012	-0.201172	-0.243408	-0.300049	-0.292237	-0.354004
-41.16	-0.189453	-0.196533	-0.23877	-0.29541	-0.303223	-0.357178
-41.06	-0.192627	-0.199707	-0.241943	-0.298584	-0.296143	-0.350098
-40.96	-0.185547	-0.192627	-0.234863	-0.299316	-0.296143	-0.350098
-40.86	-0.185547	-0.197266	-0.234863	-0.299316	-0.296143	-0.350098
-40.76	-0.185547	-0.204346	-0.234863	-0.299316	-0.288331	-0.342286
-40.66	-0.177734	-0.196533	-0.23877	-0.291504	-0.28833	-0.353271
-40.56	-0.185547	-0.208252	-0.23877	-0.291504	-0.300049	-0.35791
-40.46	-0.185547	-0.208252	-0.23877	-0.291504	-0.300049	-0.35791
-40.36	-0.185547	-0.208252	-0.23877	-0.291504	-0.300049	-0.35791
-40.26	-0.188721	-0.208252	-0.246582	-0.303223	-0.288331	-0.346192
-40.16	-0.181641	-0.196533	-0.234863	-0.291504	-0.291504	-0.346191
-40.06	-0.181641	-0.204346	-0.234863	-0.291504	-0.296143	-0.346191
-39.96	-0.193359	-0.204346	-0.234863	-0.291504	-0.288331	-0.33838
-39.86	-0.185547	-0.196533	-0.227051	-0.283691	-0.296143	-0.338379
-39.76	-0.185547	-0.196533	-0.227051	-0.283691	-0.292969	-0.339844
-39.66	-0.182373	-0.196533	-0.228516	-0.280518	-0.28833	-0.342285
-39.56	-0.177734	-0.196533	-0.242676	-0.28833	-0.28833	-0.342285
-39.46	-0.177734	-0.196533	-0.242676	-0.29541	-0.28833	-0.342285
-39.36	-0.177734	-0.208252	-0.242676	-0.29541	-0.276612	-0.330567
-39.26	-0.170654	-0.196533	-0.230957	-0.283691	-0.28125	-0.342285
-39.16	-0.189453	-0.196533	-0.230957	-0.283691	-0.300049	-0.342285
-39.06	-0.189453	-0.196533	-0.230957	-0.283691	-0.300049	-0.342285
-38.96	-0.189453	-0.196533	-0.230957	-0.283691	-0.300049	-0.342285
-38.86	-0.189453	-0.196533	-0.234131	-0.283691	-0.300049	-0.342285
-38.76	-0.197266	-0.201172	-0.246582	-0.283691	-0.292237	-0.334473
-38.66	-0.189453	-0.200439	-0.23877	-0.287598	-0.292236	-0.334473
-38.56	-0.189453	-0.208252	-0.23877	-0.287598	-0.292236	-0.339111
-38.46	-0.189453	-0.208252	-0.23877	-0.287598	-0.280519	-0.334474
-38.36	-0.180908	-0.196533	-0.23877	-0.275879	-0.280518	-0.334473
-38.26	-0.185547	-0.196533	-0.23877	-0.275879	-0.280518	-0.334473
-38.16	-0.185547	-0.196533	-0.23877	-0.275879	-0.283691	-0.334473
-38.06	-0.197266	-0.196533	-0.23877	-0.275879	-0.300049	-0.342285
-37.96	-0.197266	-0.211426	-0.23877	-0.275879	-0.292237	-0.337647
-37.86	-0.189453	-0.208252	-0.23877	-0.275879	-0.292236	-0.342285
-37.76	-0.189453	-0.208252	-0.23877	-0.275879	-0.292236	-0.342285
-37.66	-0.189453	-0.208252	-0.23877	-0.275879	-0.27588	-0.325928
-37.56	-0.173096	-0.191895	-0.222412	-0.262695	-0.273438	-0.318848
-37.46	-0.178467	-0.184814	-0.215332	-0.260254	-0.280518	-0.318848
-37.36	-0.185547	-0.184814	-0.215332	-0.260254	-0.280518	-0.318848
-37.26	-0.185547	-0.184814	-0.227051	-0.271973	-0.280518	-0.318848
-37.16	-0.185547	-0.184814	-0.227051	-0.271973	-0.280518	-0.323486
-37.06	-0.185547	-0.184814	-0.227051	-0.271973	-0.2688	-0.318848
-36.96	-0.173828	-0.184814	-0.219971	-0.264893	-0.268799	-0.318848
-36.86	-0.173828	-0.184814	-0.227051	-0.271973	-0.276611	-0.318848
-36.76	-0.173828	-0.189453	-0.227051	-0.271973	-0.276611	-0.33374
-36.66	-0.173828	-0.196533	-0.23877	-0.271973	-0.268799	-0.330567
-36.56	-0.169189	-0.188721	-0.230957	-0.26416	-0.273438	-0.330566
-36.46	-0.173828	-0.188721	-0.230957	-0.26416	-0.280518	-0.330566
-36.36	-0.185547	-0.196533	-0.230957	-0.26416	-0.280518	-0.330566
-36.26	-0.185547	-0.196533	-0.230957	-0.271973	-0.280518	-0.330566
-36.16	-0.185547	-0.196533	-0.23877	-0.271973	-0.280518	-0.330566
-36.06	-0.185547	-0.196533	-0.23877	-0.271973	-0.280518	-0.335205
-35.96	-0.185547	-0.196533	-0.23877	-0.275146	-0.280518	-0.330567
-35.86	-0.173828	-0.184814	-0.227051	-0.268066	-0.280518	-0.330566
-35.76	-0.178467	-0.184814	-0.227051	-0.268066	-0.283691	-0.330566
-35.66	-0.185547	-0.187988	-0.230225	-0.268066	-0.280518	-0.322754
-35.56	-0.177734	-0.184814	-0.227051	-0.271973	-0.280518	-0.322754
-35.46	-0.185547	-0.184814	-0.23877	-0.271973	-0.277344	-0.31958
-35.36	-0.182373	-0.181641	-0.235596	-0.268799	-0.272705	-0.318115
-35.26	-0.177734	-0.188721	-0.230957	-0.268799	-0.272705	-0.322754
-35.16	-0.177734	-0.188721	-0.230957	-0.275879	-0.272705	-0.322754
-35.06	-0.177734	-0.193359	-0.235596	-0.275879	-0.260987	-0.311036
-34.96	-0.166016	-0.188721	-0.230957	-0.26416	-0.260986	-0.311035
-34.86	-0.177734	-0.188721	-0.23877	-0.26416	-0.260986	-0.318848
-34.76	-0.182373	-0.188721	-0.23877	-0.275879	-0.260986	-0.318848
-34.66	-0.189453	-0.188721	-0.23877	-0.275879	-0.268799	-0.323486
-34.56	-0.189453	-0.188721	-0.23877	-0.275879	-0.260987	-0.322755
-34.46	-0.181641	-0.180908	-0.230957	-0.268066	-0.265625	-0.322754
-34.36	-0.181641	-0.184082	-0.230957	-0.268066	-0.268067	-0.318115
-34.26	-0.177002	-0.184082	-0.226318	-0.27124	-0.260987	-0.311036
-34.16	-0.169922	-0.184814	-0.230957	-0.26416	-0.249268	-0.299317
-34.06	-0.166016	-0.173096	-0.219238	-0.25708	-0.260986	-0.311035
-33.96	-0.169189	-0.173096	-0.219238	-0.26416	-0.26416	-0.311035
-33.86	-0.173828	-0.173096	-0.223877	-0.26416	-0.268799	-0.311035
-33.76	-0.173828	-0.173096	-0.230957	-0.26416	-0.268799	-0.314209
-33.66	-0.173828	-0.177734	-0.230957	-0.26416	-0.268799	-0.318848
-33.56	-0.173828	-0.196533	-0.230957	-0.26416	-0.268799	-0.318848
-33.46	-0.185547	-0.196533	-0.230957	-0.26416	-0.260987	-0.311036
-33.36	-0.177734	-0.188721	-0.230957	-0.256348	-0.260986	-0.311035
-33.26	-0.177734	-0.188721	-0.230957	-0.259521	-0.246095	-0.296144
-33.16	-0.162842	-0.173828	-0.216064	-0.260986	-0.241455	-0.291504
-33.06	-0.162842	-0.169189	-0.211426	-0.256348	-0.241455	-0.296143
-32.96	-0.169922	-0.169189	-0.223145	-0.256348	-0.241455	-0.303223
-32.86	-0.169922	-0.173828	-0.226318	-0.256348	-0.249268	-0.303223
-32.76	-0.169922	-0.188721	-0.230957	-0.256348	-0.249268	-0.314941
-32.66	-0.169922	-0.188721	-0.230957	-0.256348	-0.237549	-0.303223
-32.56	-0.158203	-0.177002	-0.219238	-0.244629	-0.232911	-0.298584
-32.46	-0.156738	-0.172363	-0.2146	-0.247803	-0.225831	-0.291504
-32.36	-0.166016	-0.165283	-0.20752	-0.240723	-0.234375	-0.283692
-32.26	-0.158203	-0.160645	-0.199707	-0.23291	-0.241455	-0.283691
-32.16	-0.158203	-0.165283	-0.20752	-0.23291	-0.241455	-0.283691
-32.06	-0.158203	-0.165283	-0.20752	-0.23291	-0.241455	-0.28833
-31.96	-0.158203	-0.177002	-0.20752	-0.23291	-0.241455	-0.29541
-31.86	-0.158203	-0.177002	-0.20752	-0.23291	-0.229737	-0.283692
-31.76	-0.146484	-0.165283	-0.195801	-0.23291	-0.229736	-0.283691
-31.66	-0.154297	-0.165283	-0.20752	-0.23291	-0.229736	-0.291504
-31.56	-0.154297	-0.165283	-0.20752	-0.23291	-0.229736	-0.291504
-31.46	-0.154297	-0.165283	-0.20752	-0.23291	-0.241455	-0.291504
-31.36	-0.154297	-0.169922	-0.20752	-0.23291	-0.241455	-0.291504
-31.26	-0.154297	-0.177002	-0.20752	-0.23291	-0.238281	-0.28833
-31.16	-0.151123	-0.173828	-0.208984	-0.229736	-0.225831	-0.279053
-31.06	-0.150391	-0.173096	-0.215332	-0.225098	-0.22583	-0.280518
-30.96	-0.150391	-0.173096	-0.215332	-0.225098	-0.22583	-0.275879
-30.86	-0.155029	-0.173096	-0.215332	-0.225098	-0.22583	-0.279053
-30.76	-0.162109	-0.173096	-0.215332	-0.225098	-0.233643	-0.29541
-30.66	-0.162109	-0.173096	-0.215332	-0.225098	-0.221924	-0.283692
-30.56	-0.150391	-0.161377	-0.211426	-0.213379	-0.217286	-0.279053
-30.46	-0.145752	-0.156738	-0.206787	-0.220459	-0.210206	-0.271973
-30.36	-0.138672	-0.152832	-0.199707	-0.218018	-0.213379	-0.271973
-30.26	-0.146484	-0.165283	-0.199707	-0.225098	-0.210206	-0.264161
-30.16	-0.138672	-0.157471	-0.191895	-0.217285	-0.210205	-0.271973
-30.06	-0.138672	-0.157471	-0.195068	-0.217285	-0.210205	-0.271973
-29.96	-0.138672	-0.157471	-0.199707	-0.217285	-0.210205	-0.271973
-29.86	-0.138672	-0.157471	-0.199707	-0.217285	-0.203125	-0.264893
-29.76	-0.138672	-0.145752	-0.199707	-0.20874	-0.210205	-0.271973
-29.66	-0.138672	-0.145752	-0.199707	-0.213379	-0.210205	-0.271973
-29.56	-0.138672	-0.145752	-0.199707	-0.225098	-0.217286	-0.267334
-29.46	-0.134033	-0.145752	-0.195068	-0.220459	-0.210206	-0.260254
-29.36	-0.126953	-0.145752	-0.187988	-0.213379	-0.198487	-0.248536
-29.26	-0.118408	-0.134033	-0.17627	-0.20166	-0.198486	-0.251709
-29.16	-0.123047	-0.134033	-0.17627	-0.20166	-0.198486	-0.256348
-29.06	-0.123047	-0.145752	-0.180908	-0.20166	-0.198486	-0.268066
-28.96	-0.130859	-0.145752	-0.195801	-0.20166	-0.198487	-0.260255
-28.86	-0.123047	-0.141113	-0.187988	-0.206299	-0.20166	-0.260254
-28.76	-0.127686	-0.145752	-0.187988	-0.213379	-0.206299	-0.260254
-28.66	-0.134766	-0.145752	-0.187988	-0.213379	-0.206299	-0.260254
-28.56	-0.134766	-0.145752	-0.191162	-0.213379	-0.203125	-0.25708
-28.46	-0.131592	-0.147217	-0.204346	-0.210205	-0.203125	-0.25708
-28.36	-0.138672	-0.149658	-0.199707	-0.205566	-0.198487	-0.252442
-28.26	-0.126953	-0.137939	-0.187988	-0.193848	-0.198486	-0.252441
-28.16	-0.126953	-0.145752	-0.187988	-0.193848	-0.198486	-0.252441
-28.06	-0.126953	-0.145752	-0.187988	-0.193848	-0.198486	-0.252441
-27.96	-0.130127	-0.145752	-0.192627	-0.205566	-0.202393	-0.24463
-27.86	-0.126953	-0.141113	-0.191895	-0.200928	-0.197754	-0.247803
-27.76	-0.122314	-0.141113	-0.195068	-0.200928	-0.190674	-0.240723
-27.66	-0.115234	-0.134033	-0.187988	-0.193848	-0.190674	-0.240723
-27.56	-0.115234	-0.134033	-0.187988	-0.193848	-0.183595	-0.232179
-27.46	-0.115234	-0.122314	-0.17627	-0.189941	-0.190674	-0.236816
-27.36	-0.119873	-0.126953	-0.17627	-0.189941	-0.1875	-0.233643
-27.26	-0.123779	-0.130859	-0.17627	-0.191406	-0.190674	-0.245362
-27.16	-0.119141	-0.126221	-0.187988	-0.193848	-0.190674	-0.252441
-27.06	-0.119141	-0.137939	-0.187988	-0.193848	-0.193848	-0.252441
-26.96	-0.119141	-0.137939	-0.187988	-0.193848	-0.190674	-0.24463
-26.86	-0.111328	-0.130127	-0.184814	-0.186035	-0.190674	-0.244629
-26.76	-0.119141	-0.130127	-0.191895	-0.186035	-0.202393	-0.244629
-26.66	-0.123779	-0.130127	-0.191895	-0.189209	-0.197754	-0.23999
-26.56	-0.126221	-0.130127	-0.187256	-0.189209	-0.178957	-0.221193
-26.46	-0.107422	-0.118408	-0.168457	-0.182129	-0.178955	-0.221191
-26.36	-0.107422	-0.118408	-0.184814	-0.186768	-0.178955	-0.229004
-26.26	-0.107422	-0.121582	-0.191895	-0.193848	-0.178955	-0.229004
-26.16	-0.107422	-0.126221	-0.191895	-0.193848	-0.178955	-0.229004
-26.06	-0.110596	-0.134033	-0.191895	-0.193848	-0.178956	-0.221192
-25.96	-0.107422	-0.126221	-0.184082	-0.186035	-0.175781	-0.218018
-25.86	-0.115967	-0.123047	-0.188721	-0.182861	-0.171143	-0.213379
-25.76	-0.111328	-0.118408	-0.184082	-0.178223	-0.171143	-0.225098
-25.66	-0.111328	-0.118408	-0.184082	-0.186035	-0.159424	-0.213379
-25.56	-0.0996094	-0.118408	-0.172363	-0.174316	-0.166504	-0.208741
-25.46	-0.0949707	-0.11377	-0.167725	-0.169678	-0.159424	-0.201661
-25.36	-0.0957031	-0.106689	-0.160645	-0.162598	-0.159424	-0.20166
-25.26	-0.0957031	-0.106689	-0.172363	-0.162598	-0.159424	-0.20166
-25.16	-0.0957031	-0.106689	-0.175537	-0.162598	-0.147706	-0.189942
-25.06	-0.0839844	-0.0949707	-0.168457	-0.162598	-0.147705	-0.189941
-24.96	-0.0957031	-0.102783	-0.168457	-0.162598	-0.15625	-0.198487
-24.86	-0.0925293	-0.0996094	-0.165283	-0.159424	-0.151612	-0.198487
-24.76	-0.0925293	-0.0949707	-0.160645	-0.154785	-0.143799	-0.197755
-24.66	-0.0871582	-0.0917969	-0.160645	-0.146973	-0.143799	-0.197754
-24.56	-0.0800781	-0.098877	-0.160645	-0.146973	-0.148438	-0.200928
-24.46	-0.0847168	-0.098877	-0.160645	-0.146973	-0.16333	-0.205566
-24.36	-0.0996094	-0.110596	-0.160645	-0.146973	-0.16333	-0.205566
-24.26	-0.0996094	-0.110596	-0.160645	-0.151611	-0.151612	-0.201661
-24.16	-0.0878906	-0.098877	-0.148926	-0.146973	-0.150147	-0.197022
-24.06	-0.083252	-0.0974121	-0.148926	-0.142334	-0.147706	-0.189942
-23.96	-0.0761719	-0.0949707	-0.148926	-0.135254	-0.139893	-0.18213
-23.86	-0.0800781	-0.0871582	-0.141113	-0.127441	-0.139893	-0.182129
-23.76	-0.0800781	-0.0871582	-0.156006	-0.135254	-0.139893	-0.182129
-23.66	-0.0800781	-0.0871582	-0.160645	-0.138428	-0.139893	-0.186768
-23.56	-0.0800781	-0.098877	-0.160645	-0.143066	-0.139893	-0.205566
-23.46	-0.0800781	-0.103516	-0.160645	-0.143066	-0.139893	-0.20874
-23.36	-0.083252	-0.110596	-0.160645	-0.143066	-0.144532	-0.201661
-23.26	-0.0761719	-0.098877	-0.148926	-0.131348	-0.151611	-0.20166
-23.16	-0.0839844	-0.098877	-0.148926	-0.131348	-0.151611	-0.20166
-23.06	-0.0839844	-0.106689	-0.148926	-0.147705	-0.159424	-0.206299
-22.96	-0.0839844	-0.106689	-0.153564	-0.154785	-0.154786	-0.205567
-22.86	-0.0878906	-0.098877	-0.152832	-0.150146	-0.159424	-0.205566
-22.76	-0.0878906	-0.102051	-0.152832	-0.154785	-0.164063	-0.205566
-22.66	-0.0925293	-0.106689	-0.152832	-0.154785	-0.171143	-0.216553
-22.56	-0.0996094	-0.111328	-0.163818	-0.159424	-0.159425	-0.209474
-22.46	-0.0878906	-0.106689	-0.156738	-0.154785	-0.154786	-0.204834
-22.36	-0.083252	-0.102051	-0.156738	-0.150146	-0.152344	-0.197754
-22.26	-0.0793457	-0.0996094	-0.156738	-0.143066	-0.15625	-0.210938
-22.16	-0.0808105	-0.115234	-0.153564	-0.143066	-0.158692	-0.205567
-22.06	-0.0847168	-0.102783	-0.141113	-0.135254	-0.16333	-0.205566
-21.96	-0.0917969	-0.105957	-0.156006	-0.135254	-0.16333	-0.205566
-21.86	-0.0917969	-0.110596	-0.160645	-0.139893	-0.151612	-0.197022
-21.76	-0.0800781	-0.098877	-0.148926	-0.135254	-0.151611	-0.20166
-21.66	-0.0800781	-0.106689	-0.153564	-0.135254	-0.151612	-0.197022
-21.56	-0.0864258	-0.102051	-0.156006	-0.135254	-0.151612	-0.194581
-21.46	-0.0839844	-0.0996094	-0.153564	-0.135254	-0.151611	-0.20166
-21.36	-0.0839844	-0.106689	-0.160645	-0.150146	-0.154785	-0.209473
-21.26	-0.088623	-0.106689	-0.163818	-0.154785	-0.144532	-0.194581
-21.16	-0.0808105	-0.0949707	-0.153564	-0.139893	-0.147705	-0.189942
-21.06	-0.0878906	-0.0949707	-0.156738	-0.135254	-0.152344	-0.19458
-20.96	-0.0878906	-0.0949707	-0.156738	-0.147705	-0.151612	-0.193848
-20.86	-0.0847168	-0.0871582	-0.153564	-0.146973	-0.146973	-0.200928
-20.76	-0.0871582	-0.098877	-0.156006	-0.145508	-0.139893	-0.197022
-20.66	-0.0878906	-0.098877	-0.148926	-0.143066	-0.154785	-0.20166
-20.56	-0.0910645	-0.098877	-0.1521	-0.143066	-0.159424	-0.20166
-20.46	-0.0957031	-0.098877	-0.168457	-0.147705	-0.160889	-0.198487
-20.36	-0.0925293	-0.098877	-0.165283	-0.151611	-0.151612	-0.18213
-20.26	-0.0761719	-0.0871582	-0.148926	-0.135254	-0.146973	-0.177491
-20.16	-0.0761719	-0.0871582	-0.148926	-0.130615	-0.139893	-0.186768
-20.06	-0.0878906	-0.0949707	-0.148926	-0.126709	-0.143066	-0.193848
-19.96	-0.0878906	-0.0949707	-0.148926	-0.131348	-0.139893	-0.18921
-19.86	-0.083252	-0.090332	-0.152832	-0.128174	-0.139893	-0.193848
-19.76	-0.0878906	-0.0949707	-0.152832	-0.135254	-0.135988	-0.177491
-19.66	-0.0715332	-0.083252	-0.139648	-0.130615	-0.135987	-0.17041
-19.56	-0.0644531	-0.0949707	-0.137207	-0.123535	-0.132813	-0.167237
-19.46	-0.0737305	-0.0917969	-0.134033	-0.123535	-0.128174	-0.175049
-19.36	-0.0761719	-0.0871582	-0.137207	-0.123535	-0.120362	-0.174317
-19.26	-0.0683594	-0.0793457	-0.134033	-0.115723	-0.13208	-0.174316
-19.16	-0.0800781	-0.0839844	-0.141113	-0.120361	-0.136719	-0.174316
-19.06	-0.083252	-0.0910645	-0.141113	-0.127441	-0.127443	-0.15796
-18.96	-0.0715332	-0.074707	-0.124756	-0.111084	-0.120362	-0.150879
-18.86	-0.0690918	-0.0708008	-0.117676	-0.104004	-0.123535	-0.154053
-18.76	-0.0761719	-0.083252	-0.122314	-0.104004	-0.125	-0.155518
-18.66	-0.072998	-0.0800781	-0.126221	-0.113281	-0.120362	-0.150879
-18.56	-0.0761719	-0.0754395	-0.121582	-0.115723	-0.108643	-0.139161
-18.46	-0.0644531	-0.0683594	-0.121582	-0.104004	-0.120361	-0.150879
-18.36	-0.0690918	-0.0871582	-0.124756	-0.104004	-0.120361	-0.155518
-18.26	-0.0878906	-0.0871582	-0.129395	-0.107178	-0.11255	-0.150147
-18.16	-0.0754395	-0.074707	-0.116943	-0.0993652	-0.112549	-0.143067
-18.06	-0.0683594	-0.067627	-0.109863	-0.0922852	-0.112549	-0.143066
-17.96	-0.0683594	-0.0708008	-0.117676	-0.0922852	-0.120361	-0.143066
-17.86	-0.0715332	-0.0754395	-0.117676	-0.104004	-0.117188	-0.139893
-17.76	-0.072998	-0.0722656	-0.114502	-0.10083	-0.104005	-0.131349
-17.66	-0.0683594	-0.0559082	-0.0981445	-0.0891113	-0.108643	-0.131348
-17.56	-0.0683594	-0.067627	-0.0981445	-0.0961914	-0.104004	-0.126709
-17.46	-0.0637207	-0.0629883	-0.0981445	-0.0915527	-0.0891125	-0.114991
-17.36	-0.0488281	-0.0480957	-0.102051	-0.079834	-0.0891113	-0.119629
-17.26	-0.0566406	-0.0527344	-0.102051	-0.0844727	-0.0891113	-0.119629
-17.16	-0.0612793	-0.067627	-0.105225	-0.0844727	-0.09375	-0.119629
-17.06	-0.0683594	-0.067627	-0.109863	-0.0844727	-0.112549	-0.119629
-16.96	-0.0683594	-0.067627	-0.109863	-0.0844727	-0.100831	-0.11963
-16.86	-0.0566406	-0.0559082	-0.0981445	-0.0727539	-0.0976564	-0.121094
-16.76	-0.0683594	-0.0527344	-0.0949707	-0.0773926	-0.0930179	-0.123536
-16.66	-0.0683594	-0.0512695	-0.090332	-0.0773926	-0.0930176	-0.123535
-16.56	-0.0683594	-0.0559082	-0.090332	-0.0844727	-0.0883795	-0.115723
-16.46	-0.0605469	-0.0598145	-0.0871582	-0.0766602	-0.10083	-0.115723
-16.36	-0.0605469	-0.0598145	-0.102051	-0.0766602	-0.0961916	-0.111084
-16.26	-0.0559082	-0.0598145	-0.0974121	-0.0837402	-0.077394	-0.0922866
-16.16	-0.0449219	-0.0480957	-0.0786133	-0.0649414	-0.0773926	-0.0922852
-16.06	-0.0449219	-0.0480957	-0.0786133	-0.0649414	-0.0820313	-0.100098
-15.96	-0.0449219	-0.0480957	-0.090332	-0.0649414	-0.10083	-0.100098
-15.86	-0.0566406	-0.0559082	-0.090332	-0.0649414	-0.10083	-0.100098
-15.76	-0.0566406	-0.059082	-0.090332	-0.0649414	-0.0930182	-0.0969244
-15.66	-0.0534668	-0.0559082	-0.0825195	-0.0603027	-0.0915529	-0.0993654
-15.56	-0.0559082	-0.0512695	-0.0778809	-0.0603027	-0.0891119	-0.107178
-15.46	-0.0566406	-0.0559082	-0.0708008	-0.0610352	-0.0820321	-0.100099
-15.36	-0.0449219	-0.0441895	-0.0622559	-0.0539551	-0.0969238	-0.100098
-15.26	-0.0449219	-0.0441895	-0.0668945	-0.0610352	-0.0969238	-0.100098
-15.16	-0.0566406	-0.0441895	-0.074707	-0.0610352	-0.0937501	-0.101563
-15.06	-0.0534668	-0.0456543	-0.0715332	-0.0695801	-0.0820325	-0.0922864
-14.96	-0.0371094	-0.036377	-0.0598145	-0.0532227	-0.0891113	-0.0922852
-14.86	-0.0371094	-0.036377	-0.0668945	-0.0563965	-0.0812991	-0.0876468
-14.76	-0.0410156	-0.0410156	-0.0708008	-0.0532227	-0.0961914	-0.0922852
-14.66	-0.0441895	-0.0480957	-0.0708008	-0.0578613	-0.10083	-0.0922852
-14.56	-0.0488281	-0.0480957	-0.0739746	-0.0649414	-0.10083	-0.100098
-14.46	-0.0566406	-0.0512695	-0.0786133	-0.0649414	-0.10083	-0.100098
-14.36	-0.0612793	-0.067627	-0.0786133	-0.0812988	-0.0891118	-0.0883794
-14.26	-0.0566406	-0.0559082	-0.0715332	-0.0766602	-0.084473	-0.0883793
-14.16	-0.052002	-0.0512695	-0.0739746	-0.0751953	-0.0773928	-0.0883792
-14.06	-0.0449219	-0.0488281	-0.0668945	-0.0727539	-0.0695807	-0.0759283
-13.96	-0.052002	-0.0480957	-0.0637207	-0.0727539	-0.0695801	-0.0805664
-13.86	-0.0566406	-0.0480957	-0.0825195	-0.0727539	-0.0812988	-0.0805664
-13.76	-0.0644531	-0.0512695	-0.0825195	-0.0727539	-0.0812988	-0.0805664
-13.66	-0.0644531	-0.0559082	-0.0825195	-0.0727539	-0.0664068	-0.0656744
-13.56	-0.0541992	-0.0527344	-0.067627	-0.0578613	-0.0617679	-0.0610355
-13.46	-0.0566406	-0.0480957	-0.0661621	-0.0532227	-0.0617676	-0.0610352
-13.36	-0.0566406	-0.0480957	-0.0708008	-0.0532227	-0.0695801	-0.0610352
-13.26	-0.0566406	-0.0480957	-0.0708008	-0.0532227	-0.0571299	-0.0603037
-13.16	-0.0559082	-0.043457	-0.0629883	-0.0407715	-0.0500491	-0.0532229
-13.06	-0.0488281	-0.036377	-0.0512695	-0.0454102	-0.038331	-0.0415048
-12.96	-0.0371094	-0.0246582	-0.0395508	-0.0336914	-0.0351563	-0.0415039
-12.86	-0.0371094	-0.0246582	-0.0395508	-0.0336914	-0.0273439	-0.0383302
-12.76	-0.0339355	-0.0214844	-0.036377	-0.0305176	-0.0344242	-0.0336918
-12.66	-0.0292969	-0.0168457	-0.0317383	-0.0258789	-0.0266116	-0.0336917
-12.56	-0.0292969	-0.00903	-0.0239258	-0.0180664	-0.021973	-0.0290531
-12.46	-0.0246582	-0.0161133	-0.0192871	-0.0212402	-0.0148931	-0.0219732
-12.36	-0.0175781	-0.00903	-0.0239258	-0.0141602	-0.00317	-0.0102544
-12.26	-0.00586	0.00269	-0.012207	-0.00244	-0.0109863	-0.0102539
-12.16	-0.0175781	0.00269	-0.012207	-0.0141602	-0.0109863	-0.0102539
-12.06	-0.0175781	-0.00513	-0.012207	-0.0141602	-0.00781	-0.0187991
-11.96	-0.0144043	-0.00195	-0.00903	-0.0109863	-0.00317	-0.0109867
-11.86	-0.00977	0.00269	-0.00439	-0.00317	0.00854	0.00537
-11.76	0.00195	0.0144043	0.00415	0.0131836	0.0131836	0.00537
-11.66	0.00659	0.0144043	0.0112305	0.0131836	0.00854	-0.00244
-11.56	0.00122	0.0144043	0.0112305	0.00537	0.00854	-0.00244
-11.46	-0.00122	0.0144043	0.0112305	0.00537	0.0163568	0.00537
-11.36	0.0136719	0.010498	0.019043	0.0131836	0.0131837	0.0022
-11.26	0.010498	0.00732	0.00415	0.0100098	0.00855	-0.00244
-11.16	-0.00586	0.00269	-0.000488	0.00537	0.00854	-0.00244
-11.06	-0.00586	0.00269	-0.000488	-0.00635	0.0202628	0.00928
-10.96	0.00586	0.0144043	0.0112305	0.00537	0.0202637	0.00928
-10.86	0.00903	0.0144043	0.0112305	0.00537	0.0124512	-0.00244
-10.76	0.0136719	0.00659	0.0112305	0.00537	0.0124512	-0.00244
-10.66	0.00195	0.00659	0.00342	0.0100098	0.0124512	-0.00244
-10.56	0.00195	0.00659	0.00342	0.0170898	0.0124512	-0.00244
-10.46	0.00195	0.00659	0.00342	0.00537	0.00854	0.00537
-10.36	0.00195	0.00269	-0.000488	0.0131836	0.00854	0.00537
-10.26	0.00195	0.00269	0.00415	0.0131836	0.00854	0.0100098
-10.16	0.00195	0.00269	0.0112305	0.0131836	0.0202632	0.0288081
-10.06	0.0136719	0.0144043	0.0229492	0.0170898	0.0124512	0.0209961
-9.96001	0.0136719	0.0144043	0.0229492	0.0170898	0.0124512	0.0209961
-9.86001	0.00195	0.0144043	0.0229492	0.0170898	0.0124512	0.0209961
-9.76001	0.00195	0.0144043	0.0112305	0.0170898	0.0202631	0.028808
-9.66001	0.00977	0.0144043	0.019043	0.0249023	0.00854	0.0288086
-9.56001	0.00977	0.0144043	0.019043	0.0249023	0.0156245	0.0195307
-9.46001	0.00903	0.0214844	0.0183105	0.0319824	0.00855	0.00537
-9.36001	0.00195	0.00269	0.0112305	0.0131836	0.00854	0.0100098
-9.26001	0.00195	0.00269	0.0112305	0.0131836	0.0131836	0.0170898
-9.16001	0.00659	0.00269	0.0112305	0.0131836	0.0202637	0.0170898
-9.06001	0.0136719	0.00269	0.0112305	0.0131836	0.0202628	0.0288077
-8.96001	0.0136719	0.0144043	0.026123	0.0249023	0.015625	0.0288086
-8.86001	0.0136719	0.0144043	0.019043	0.0170898	0.0163571	0.0319821
-8.76001	0.0214844	0.010498	0.0236816	0.0202637	0.0163574	0.0249023
-8.66001	0.0214844	0.010498	0.019043	0.0178223	0.00854	0.0249023
-8.56001	0.0214844	0.010498	0.019043	0.0202637	0.00854	0.0249023
-8.46001	0.0214844	0.010498	0.019043	0.0178223	0.00854	0.0170898
-8.36001	0.0136719	0.010498	0.019043	0.0249023	0.00854	0.0170898
-8.26001	0.0136719	0.00269	0.0112305	0.0131836	0.0202628	0.0288077
-8.16001	0.0253906	0.0144043	0.0229492	0.0249023	0.0249023	0.0288086
-8.06001	0.0253906	0.0144043	0.0229492	0.0249023	0.0319824	0.0288086
-7.96001	0.0253906	0.0144043	0.0229492	0.0249023	0.0397943	0.0366205
-7.86001	0.0332031	0.0175781	0.0307617	0.0327148	0.0280762	0.0249023
-7.76001	0.0214844	0.010498	0.0307617	0.0280762	0.0280762	0.0249023
-7.66001	0.0214844	0.010498	0.0307617	0.0209961	0.0327147	0.0295408
-7.56001	0.026123	0.0151367	0.0354004	0.0256348	0.0397944	0.0334467
-7.46001	0.0285645	0.010498	0.0378418	0.029541	0.0468741	0.0405264
-7.36001	0.0332031	0.0222168	0.0307617	0.0288086	0.0397949	0.0405273
-7.26001	0.0253906	0.0222168	0.0307617	0.0288086	0.0397949	0.0405273
-7.16001	0.0253906	0.0222168	0.0307617	0.0288086	0.0319824	0.0405273
-7.06001	0.0253906	0.0144043	0.0307617	0.0288086	0.0351557	0.0483392
-6.96001	0.0332031	0.0222168	0.0385742	0.0202637	0.0312498	0.035156
-6.86001	0.0246582	0.0222168	0.041748	0.0163574	0.0358885	0.0327147
-6.76001	0.0292969	0.0222168	0.0339355	0.0209961	0.0358878	0.0444327
-6.66001	0.0378418	0.0222168	0.0385742	0.0327148	0.0405272	0.0412596
-6.56001	0.0378418	0.0222168	0.0432129	0.0341797	0.0444331	0.0483393
-6.46001	0.0449219	0.0222168	0.0354004	0.0288086	0.0397949	0.0483398
-6.36001	0.0332031	0.0222168	0.0307617	0.0288086	0.0397949	0.045166
-6.26001	0.0285645	0.0222168	0.0307617	0.0288086	0.0397943	0.0483392
-6.16001	0.0292969	0.0222168	0.0385742	0.0366211	0.0397949	0.0483398
-6.06001	0.0214844	0.0222168	0.0385742	0.0366211	0.0515128	0.0600577
-5.96001	0.0332031	0.0339355	0.0424805	0.0319824	0.0515137	0.0600586
-5.86001	0.0332031	0.0339355	0.0424805	0.0249023	0.0397949	0.0483398
-5.76001	0.0332031	0.0339355	0.0424805	0.029541	0.0397949	0.0483398
-5.66	0.0332031	0.0222168	0.0424805	0.0366211	0.0397949	0.0483398
-5.56001	0.0332031	0.0222168	0.0424805	0.0319824	0.0515128	0.0600577
-5.46001	0.0332031	0.0339355	0.0424805	0.0366211	0.0515137	0.0600586
-5.36001	0.0332031	0.0339355	0.0424805	0.0366211	0.0515137	0.0522461
-5.26001	0.0332031	0.0292969	0.0424805	0.0249023	0.0593262	0.0600586
-5.16	0.0410156	0.0300293	0.050293	0.0327148	0.0546875	0.0600586
-5.06001	0.0410156	0.0222168	0.050293	0.0327148	0.0522461	0.0554199
-4.96001	0.0410156	0.0222168	0.050293	0.0327148	0.0515137	0.0483398
-4.86001	0.0410156	0.0222168	0.050293	0.0327148	0.0632315	0.0483389
-4.76001	0.0527344	0.0222168	0.0620117	0.0366211	0.0585938	0.0483398
-4.66	0.0449219	0.0222168	0.0456543	0.0366211	0.0397949	0.0483398
-4.56001	0.0449219	0.019043	0.0432129	0.0366211	0.0476068	0.0561517
-4.46001	0.0480957	0.0222168	0.0456543	0.0444336	0.0476074	0.0561523
-4.36001	0.0410156	0.0222168	0.0385742	0.0444336	0.0444336	0.0437012
-4.26001	0.0410156	0.0222168	0.0385742	0.0412598	0.0444336	0.0412598
-4.16	0.0456543	0.0268555	0.0432129	0.0412598	0.063231	0.0568833
-4.06001	0.0527344	0.0339355	0.0620117	0.0483398	0.0585938	0.0522461
-3.96001	0.0527344	0.0339355	0.0588379	0.0437012	0.0397949	0.0522461
-3.86001	0.0495605	0.0292969	0.0424805	0.0366211	0.0397949	0.0405273
-3.76001	0.0449219	0.0222168	0.0424805	0.0366211	0.0366211	0.0358887
-3.66	0.0449219	0.019043	0.0424805	0.0366211	0.0319824	0.0288086
-3.56001	0.0449219	0.0144043	0.0424805	0.0319824	0.0383292	0.0366203
-3.46001	0.0512695	0.0253906	0.0410156	0.0280762	0.0358883	0.0366207
-3.36001	0.0410156	0.0222168	0.0385742	0.029541	0.0351554	0.0483389
-3.26001	0.0495605	0.0292969	0.0471191	0.0366211	0.0249023	0.0437012
-3.16	0.0332031	0.0222168	0.0424805	0.0319824	0.024902	0.0412594
-3.06001	0.0378418	0.0236816	0.0307617	0.0263672	0.0273432	0.0451655
-2.96001	0.0402832	0.0144043	0.0307617	0.0288086	0.0280753	0.0468742
-2.86001	0.0410156	0.020752	0.0385742	0.0351563	0.0397937	0.0561511
-2.76001	0.0527344	0.0268555	0.0424805	0.0412598	0.0397949	0.0576172
-2.66	0.0527344	0.0222168	0.0424805	0.0366211	0.0397941	0.058593
-2.56001	0.0527344	0.0253906	0.0378418	0.0366211	0.0515121	0.0678695
-2.46001	0.0644531	0.0463867	0.0424805	0.0366211	0.0529776	0.069335
-2.36001	0.0527344	0.050293	0.0439453	0.0366211	0.0571275	0.0781236
-2.26001	0.0605469	0.0488281	0.0527344	0.0444336	0.0490723	0.0771484
-2.16	0.0605469	0.050293	0.0354004	0.0412598	0.0468742	0.0781242
-2.06001	0.0559082	0.0441895	0.0378418	0.0351563	0.039794	0.0756826
-1.96001	0.0488281	0.041748	0.0307617	0.0327148	0.0444323	0.0607898
-1.86001	0.0410156	0.0432129	0.0354004	0.029541	0.0468742	0.0593254
-1.76001	0.0292969	0.0395508	0.0292969	0.0280762	0.0351563	0.0515137
-1.66	0.0214844	0.0300293	0.0119629	0.0280762	0.0373532	0.0490719
-1.56001	0.026123	0.0314941	0.019043	0.0256348	0.063231	0.0646958
-1.46001	0.020752	0.0339355	0.0229492	0.0366211	0.0593262	0.0405273
-1.36001	0.00195	0.0292969	0.00806	0.0341797	0.0742164	0.0678687
-1.26001	0.0378418	0.0534668	0.0456543	0.0632324	0.0803223	0.076416
-1.16	0.0527344	0.0893555	0.0541992	0.0678711	0.0930173	0.0749509
-1.06001	0.0598145	0.0808105	0.0385742	0.0444336	0.0983875	0.090575
-0.960007	0.0637207	0.0957031	0.0581055	0.0476074	0.0905749	0.0756823
-0.860008	0.0651855	0.0925293	0.0651855	0.0444336	0.0373523	0.0686023
-0.76001	0.0581055	0.101807	0.0791016	0.0458984	0.0695801	0.0632324
-0.660004	0.0793457	0.106689	0.0964355	0.0344238	0.165525	0.0700658
-0.560005	0.158936	0.0900879	0.106445	-0.000244	0.132816	0.0827674
-0.460007	0.0708008	0.0957031	0.0847168	-0.00317	0.176509	0.0593216
-0.360008	0.127686	0.122314	0.127686	0.0600586	-0.210938	0.0483389
-0.26001	0.131592	-0.0388184	0.140137	0.0366211	-3.34302	0.236816
-0.160004	0.350586	0.548828	0.118408	0.532715	-3.72897	-1.11422
-0.0600052	-0.806641	-0.316162	-1.08569	-0.130127	-3.33935	-4.1311
0.0399933	-0.767822	-0.255371	-1.01489	-1.02026	-2.917	-3.05469
0.139992	-0.692383	-0.131592	-0.83374	-0.733398	-1.56249	-11.3132
0.23999	-1.08887	-1.93579	-1.96875	-3.84644	2.89575	-2.9585
0.339996	-0.109131	-0.48877	-0.59375	-1.08154	5.62358	4.79545
0.439995	0.455078	0.461182	1.03198	1.32129	7.25685	9.67506
0.539993	1.02759	1.44165	2.21655	3.11255	8.20045	13.0081
0.639992	1.24902	1.74072	2.78076	4.31421	8.83985	14.9072
0.73999	1.36133	1.92676	3.05225	4.92358	9.63184	16.6914
0.839996	1.52734	2.27808	3.51001	5.47388	10.0459	17.7659
0.939995	1.67212	2.5376	3.83008	5.84692	10.2942	18.4927
1.03999	1.6748	2.52515	3.85303	6.00708	10.6211	19.2146
1.13999	1.74194	2.64038	4.04736	6.21826	10.8291	19.5295
1.23999	1.73657	2.70898	4.07739	6.44507	11.033	20.075
1.34	1.82813	2.79663	4.18872	6.74243	11.2166	20.3848
1.43999	1.88574	2.82861	4.26489	6.66919	11.4658	20.5002
1.53999	1.93286	2.88721	4.30859	6.83569	11.4719	20.7366
1.63999	1.93481	2.88623	4.34131	6.84473	11.5776	20.8264
1.73999	1.95923	2.93066	4.39355	6.89038	11.6001	21.0171
1.84	2.02954	2.99023	4.42993	6.95142	11.6138	21.0564
1.93999	2.04883	3.02954	4.45361	7.07446	11.6492	21.2368
2.03999	2.07349	3.03809	4.49097	7.10693	11.7791	21.3582
2.13999	2.09375	3.05542	4.50269	7.17969	11.8579	21.3032
2.23999	2.10059	3.08496	4.51123	7.21045	11.9219	21.3157
2.34	2.12964	3.09937	4.54053	7.25244	12.0017	21.415
2.43999	2.14893	3.12354	4.56348	7.31445	12.0535	21.5415
2.53999	2.17334	3.16138	4.60742	7.38208	12.1409	21.5769
2.63999	2.19629	3.19434	4.63892	7.41382	12.1831	21.6538
2.73999	2.20728	3.22437	4.67041	7.48291	12.207	21.7539
2.84	2.23022	3.25903	4.69971	7.53491	12.2561	21.7905
2.93999	2.24902	3.28931	4.7395	7.59521	12.3145	21.8574
3.03999	2.27344	3.32178	4.79077	7.6521	12.3508	21.9146
3.13999	2.27563	3.31958	4.80347	7.69604	12.4014	21.9761
3.23999	2.3103	3.33618	4.83228	7.72827	12.4407	22.0605
3.34	2.31055	3.33789	4.8623	7.75977	12.5044	22.1504
3.43999	2.33716	3.35205	4.89844	7.8186	12.5696	22.2292
3.53999	2.36157	3.3938	4.93311	7.87988	12.5869	22.312
3.63999	2.37354	3.3938	4.94238	7.92529	12.6536	22.3865
3.73999	2.38428	3.41089	4.97217	7.979	12.7131	22.4829
3.84	2.40552	3.43433	5.01294	8.03491	12.7791	22.5825
3.93999	2.42749	3.46509	5.04272	8.08032	12.8364	22.6689
4.03999	2.44482	3.48413	5.07886	8.13525	12.8967	22.7593
4.13999	2.4668	3.50366	5.09863	8.19092	12.9373	22.8313
4.23999	2.47607	3.50977	5.11499	8.21899	12.9893	22.9238
4.34	2.49829	3.52734	5.14038	8.25684	13.0183	23.0103
4.43999	2.49512	3.54224	5.14966	8.30469	13.0891	23.0889
4.53999	2.52588	3.56738	5.18433	8.35034	13.1172	23.1492
4.63999	2.53516	3.58057	5.20166	8.3855	13.1665	23.2266
4.73999	2.54907	3.5979	5.23193	8.43628	13.2302	23.3052
4.84	2.56958	3.61377	5.24316	8.47632	13.272	23.3782
4.93999	2.59326	3.6333	5.27051	8.52026	13.3101	23.448
5.03999	2.5979	3.65137	5.30493	8.56812	13.3669	23.5093
5.13999	2.60815	3.66504	5.32568	8.61426	13.4106	23.5947
5.23999	2.63257	3.68457	5.35718	8.63721	13.4568	23.6489
5.34	2.64746	3.69312	5.37329	8.68481	13.4922	23.7131
5.43999	2.6521	3.70435	5.3728	8.71558	13.5493	23.7969
5.53999	2.66479	3.73315	5.40161	8.75635	13.5981	23.8608
5.63999	2.67896	3.75684	5.43555	8.79468	13.6375	23.9172
5.73999	2.68701	3.77881	5.45532	8.82935	13.6692	23.979
5.84	2.69604	3.78271	5.45581	8.85669	13.717	24.04
5.93999	2.7002	3.79614	5.46924	8.89429	13.7666	24.1123
6.03999	2.71851	3.82275	5.51416	8.93896	13.8027	24.1831
6.13999	2.73022	3.82617	5.52271	8.95874	13.8452	24.2388
6.23999	2.75049	3.85352	5.54565	8.9978	13.8779	24.3059
6.34	2.75903	3.86816	5.56641	9.02808	13.9126	24.3604
6.43999	2.75757	3.87695	5.573	9.06055	13.9392	24.4021
6.53999	2.771	3.88892	5.58618	9.08008	13.9714	24.4504
6.63999	2.77417	3.90137	5.61304	9.10449	13.9912	24.511
6.73999	2.78613	3.90161	5.62109	9.12109	14.0344	24.5747
6.84	2.79639	3.92505	5.64331	9.1582	14.0586	24.6162
6.93999	2.79565	3.94165	5.64233	9.17993	14.1001	24.6624
7.03999	2.81274	3.95166	5.65942	9.2019	14.116	24.7048
7.13999	2.81689	3.96045	5.66821	9.22705	14.1592	24.7559
7.23999	2.83008	3.97925	5.69897	9.25293	14.2031	24.8115
7.34	2.84058	3.99902	5.70679	9.28833	14.219	24.8508
7.43999	2.85303	4.01636	5.72729	9.33228	14.2539	24.894
7.53999	2.86157	4.01855	5.74414	9.35229	14.2783	24.9363
7.63999	2.87183	4.02808	5.75781	9.36279	14.313	24.9895
7.73999	2.88428	4.04297	5.77026	9.39941	14.3477	25.0464
7.84	2.89233	4.05811	5.80176	9.42944	14.3757	25.0825
7.93999	2.89624	4.06274	5.80566	9.45776	14.387	25.1172
8.03999	2.9043	4.0708	5.81689	9.46875	14.4158	25.1638
8.13999	2.90723	4.08545	5.82446	9.49292	14.447	25.2063
8.23999	2.92114	4.09473	5.83862	9.51392	14.4739	25.231
8.34	2.93066	4.10205	5.84814	9.53613	14.5007	25.2778
8.43999	2.93164	4.11694	5.86401	9.56299	14.5203	25.3257
8.53999	2.95044	4.13037	5.88037	9.58252	14.5537	25.3694
8.63999	2.95654	4.13013	5.89673	9.61572	14.5908	25.3997
8.73999	2.97388	4.14526	5.91162	9.64502	14.6221	25.4473
8.84	2.98657	4.17188	5.93823	9.67236	14.6394	25.4795
8.93999	2.99829	4.16968	5.93604	9.6936	14.6616	25.5212
9.03999	2.99438	4.17993	5.94629	9.70386	14.7007	25.5527
9.13999	3.01318	4.19946	5.9707	9.73608	14.7209	25.5881
9.23999	3.01733	4.20435	5.9856	9.75879	14.7537	25.6216
9.34	3.02637	4.20874	5.99951	9.78442	14.7905	25.6704
9.43999	3.04517	4.2356	6.02856	9.81372	14.8235	25.7229
9.53999	3.06177	4.24731	6.03809	9.83789	14.834	25.7527
9.63999	3.0603	4.24731	6.04834	9.84595	14.8542	25.7849
9.73999	3.06494	4.25366	6.05298	9.86084	14.8779	25.8164
9.84	3.0813	4.26782	6.06958	9.88208	14.8857	25.8245
9.93999	3.07544	4.27026	6.06812	9.90405	14.925	25.8628
10.04	3.09253	4.28271	6.09229	9.92822	14.9531	25.9082
10.14	3.11743	4.30396	6.104	9.95728	14.9622	25.9321
10.24	3.12305	4.31348	6.11914	9.96533	14.9956	25.9653
10.34	3.12622	4.32422	6.13135	9.98682	15.012	25.9944
10.44	3.12524	4.32324	6.14478	9.9917	15.0222	26.0354
10.54	3.14258	4.34082	6.15747	10.0137	15.0442	26.0525
10.64	3.14478	4.35474	6.15576	10.0354	15.0615	26.0825
10.74	3.15283	4.37061	6.17773	10.0647	15.0742	26.1069
10.84	3.14111	4.36255	6.17993	10.0654	15.1008	26.1335
10.94	3.16235	4.38306	6.20142	10.092	15.125	26.1658
11.04	3.16992	4.39258	6.2124	10.1047	15.1414	26.1941
11.14	3.18408	4.40112	6.21851	10.125	15.1565	26.2058
11.24	3.18188	4.3894	6.21387	10.1353	15.176	26.239
11.34	3.19434	4.40747	6.24121	10.1479	15.1924	26.2646
11.44	3.19434	4.42065	6.24976	10.1643	15.2097	26.2869
11.54	3.20605	4.43408	6.25562	10.1863	15.2234	26.3074
11.64	3.21094	4.43652	6.25806	10.1951	15.2397	26.3318
11.74	3.21338	4.4436	6.25342	10.2036	15.2571	26.3462
11.84	3.21411	4.45068	6.26807	10.2092	15.2788	26.3735
11.94	3.23364	4.45142	6.27344	10.231	15.2861	26.3875
12.04	3.23047	4.4646	6.29248	10.2383	15.2979	26.4197
12.14	3.23291	4.48193	6.3042	10.2578	15.3135	26.4346
12.24	3.24536	4.47949	6.30005	10.2656	15.3337	26.4675
12.34	3.25708	4.49365	6.32031	10.2859	15.3516	26.491
12.44	3.26489	4.49756	6.33838	10.3118	15.376	26.512
12.54	3.26489	4.49902	6.33838	10.3203	15.3806	26.5391
12.64	3.26978	4.50244	6.35254	10.3167	15.3926	26.5476
12.74	3.2688	4.50317	6.35498	10.3284	15.4177	26.5688
12.84	3.27979	4.50488	6.36597	10.3511	15.4338	26.5901
12.94	3.2915	4.51416	6.38159	10.3838	15.4392	26.614
13.04	3.28906	4.5188	6.38232	10.3909	15.4512	26.6262
13.14	3.29614	4.52295	6.38379	10.3909	15.4731	26.6558
13.24	3.30396	4.5332	6.38623	10.4104	15.5017	26.6848
13.34	3.31714	4.5376	6.40576	10.4299	15.52	26.7097
13.44	3.32593	4.53687	6.41675	10.4409	15.5237	26.7192
13.54	3.32739	4.55322	6.43311	10.4573	15.541	26.739
13.64	3.32739	4.55347	6.44482	10.4768	15.5559	26.7583
13.74	3.32349	4.55005	6.43311	10.4814	15.5798	26.7942
13.84	3.33984	4.57275	6.45264	10.5049	15.5872	26.8015
13.94	3.33472	4.57227	6.44507	10.5005	15.5989	26.8328
14.04	3.33521	4.57275	6.46436	10.5151	15.6111	26.8452
14.14	3.33984	4.57739	6.45728	10.5244	15.6301	26.8674
14.24	3.35864	4.5918	6.47632	10.5542	15.6331	26.8682
14.34	3.35474	4.58521	6.47925	10.5667	15.6575	26.8916
14.44	3.36646	4.60425	6.47241	10.5669	15.6575	26.9143
14.54	3.36963	4.61572	6.48413	10.5784	15.6729	26.9312
14.64	3.37427	4.60864	6.47681	10.594	15.6963	26.9546
14.74	3.37402	4.61865	6.49854	10.6172	15.7126	26.9844
14.84	3.39038	4.63525	6.51587	10.6174	15.7261	27.0085
14.94	3.40845	4.64282	6.52148	10.6289	15.7283	27.0117
15.04	3.3938	4.63843	6.51904	10.6206	15.7351	27.0327
15.14	3.40527	4.65527	6.52344	10.6367	15.7634	27.0593
15.24	3.40527	4.66333	6.54248	10.6501	15.7695	27.0593
15.34	3.40991	4.6499	6.53052	10.6516	15.7744	27.0757
15.44	3.42017	4.66943	6.53906	10.6726	15.7905	27.0938
15.54	3.4248	4.67871	6.55713	10.6829	15.802	27.1028
15.64	3.42603	4.67529	6.55835	10.6887	15.8008	27.1106
15.74	3.42773	4.677	6.56616	10.6953	15.8169	27.1394
15.84	3.44409	4.70044	6.5835	10.7139	15.8318	27.1567
15.94	3.448	4.69336	6.58569	10.7185	15.8293	27.1731
16.04	3.4397	4.69653	6.59277	10.7334	15.8489	27.1763
16.14	3.44165	4.69385	6.60034	10.7356	15.8474	27.1926
16.24	3.44727	4.70557	6.60498	10.7412	15.8721	27.1995
16.34	3.45557	4.71729	6.62061	10.7588	15.887	27.219
16.44	3.46362	4.73145	6.61914	10.7495	15.9031	27.2383
16.54	3.47192	4.72876	6.63135	10.7642	15.9065	27.2432
16.64	3.4751	4.72412	6.62817	10.7573	15.897	27.2488
16.74	3.47363	4.72729	6.62671	10.7676	15.9114	27.2507
16.84	3.47241	4.73193	6.63892	10.7773	15.9141	27.261
16.94	3.46313	4.72485	6.6272	10.7695	15.9373	27.282
17.04	3.48682	4.74048	6.64771	10.793	15.9526	27.292
17.14	3.48657	4.74194	6.66089	10.803	15.9612	27.3013
17.24	3.49121	4.74805	6.66699	10.8123	15.9597	27.3076
17.34	3.47339	4.73486	6.65381	10.8108	15.9805	27.3252
17.44	3.48706	4.7478	6.66284	10.8198	15.9758	27.3315
17.54	3.47925	4.74463	6.66675	10.812	15.9907	27.3425
17.64	3.4895	4.75342	6.66528	10.8223	16.0029	27.355
17.74	3.49097	4.7627	6.67773	10.8269	16.0271	27.3713
17.84	3.49414	4.77051	6.67749	10.8496	16.0339	27.3857
17.94	3.50562	4.77026	6.6936	10.854	16.0308	27.3872
18.04	3.49072	4.75537	6.68579	10.8391	16.041	27.4092
18.14	3.50562	4.77417	6.69287	10.8577	16.0371	27.4155
18.24	3.49707	4.76563	6.69604	10.8616	16.0464	27.4333
18.34	3.49854	4.76709	6.70532	10.8701	16.0461	27.4329
18.44	3.50537	4.76221	6.69727	10.8699	16.0679	27.4463
18.54	3.50854	4.76978	6.71533	10.8833	16.0771	27.4602
18.64	3.51318	4.78931	6.7168	10.8892	16.0842	27.4717
18.74	3.51318	4.78931	6.71509	10.8892	16.0842	27.4819
18.84	3.51318	4.79395	6.72437	10.9111	16.0935	27.5037
18.94	3.52954	4.80566	6.73926	10.9131	16.0999	27.5129
19.04	3.52148	4.80005	6.74316	10.9343	16.1074	27.5222
19.14	3.54346	4.81714	6.74316	10.9436	16.0942	27.5325
19.24	3.52783	4.81567	6.73926	10.9421	16.1111	27.5413
19.34	3.53223	4.81543	6.75073	10.938	16.1125	27.5562
19.44	3.5415	4.82935	6.75513	10.9587	16.1296	27.5725
19.54	3.55566	4.84326	6.76538	10.9705	16.1389	27.5793
19.64	3.54712	4.8479	6.76685	10.9705	16.146	27.5872
19.74	3.5564	4.85498	6.77393	10.9807	16.1492	27.5989
19.84	3.56323	4.84326	6.77686	10.9854	16.1497	27.5933
19.94	3.55005	4.83472	6.76587	10.9766	16.1528	27.6072
20.04	3.56396	4.83472	6.77759	10.978	16.1621	27.6189
20.14	3.55933	4.84399	6.77051	10.9766	16.1658	27.6289
20.24	3.55933	4.83911	6.77271	10.9812	16.1682	27.6304
20.34	3.55591	4.83447	6.77417	10.9778	16.1853	27.6365
20.44	3.56616	4.84375	6.79224	10.9763	16.1836	27.6458
20.54	3.55908	4.84229	6.78979	10.9856	16.1851	27.656
20.64	3.56372	4.85156	6.79663	10.9956	16.1951	27.6768
20.74	3.57788	4.8584	6.81616	11.0049	16.2043	27.6836
20.84	3.58228	4.86621	6.82324	11.012	16.2112	27.6882
20.94	3.5752	4.87451	6.82056	11.0234	16.2158	27.6982
21.04	3.57764	4.88477	6.83228	11.0164	16.2261	27.7029
21.14	3.58691	4.88232	6.83472	11.031	16.2351	27.7073
21.24	3.58228	4.89233	6.83203	11.0459	16.2383	27.7175
21.34	3.58521	4.8938	6.84229	11.0471	16.2451	27.7266
21.44	3.59448	4.89233	6.8396	11.0503	16.2544	27.7295
21.54	3.58984	4.90137	6.84668	11.0667	16.269	27.7529
21.64	3.59839	4.91699	6.86304	11.0806	16.2932	27.7771
21.74	3.61621	4.92334	6.87305	11.0859	16.2922	27.7722
21.84	3.6106	4.92456	6.88232	11.0859	16.2886	27.7722
21.94	3.61646	4.9248	6.88232	11.0884	16.3118	27.7954
22.04	3.62476	4.93042	6.89648	11.1047	16.3115	27.7915
22.14	3.61621	4.92456	6.89258	11.1006	16.3271	27.8186
22.24	3.62549	4.94727	6.90161	11.1169	16.3284	27.8237
22.34	3.62207	4.94067	6.90137	11.1121	16.3386	27.834
22.44	3.61597	4.95093	6.90454	11.1199	16.3455	27.8416
22.54	3.61743	4.95386	6.91284	11.1165	16.3416	27.8452
22.64	3.61108	4.95068	6.91138	11.1267	16.3545	27.8647
22.74	3.61719	4.95825	6.9231	11.1279	16.3577	27.8723
22.84	3.62036	4.95508	6.92041	11.1311	16.3691	27.8752
22.94	3.6272	4.95825	6.92749	11.1426	16.3691	27.8752
23.04	3.62012	4.96045	6.92725	11.1411	16.3691	27.8845
23.14	3.62012	4.95117	6.91553	11.1401	16.3813	27.8921
23.24	3.62939	4.96265	6.92798	11.1504	16.3884	27.9109
23.34	3.63501	4.9729	6.94653	11.1619	16.3999	27.9138
23.44	3.63159	4.97412	6.94653	11.165	16.3958	27.9275
23.54	3.62769	4.98047	6.95435	11.1624	16.4004	27.9299
23.64	3.62744	4.96997	6.9541	11.1621	16.4192	27.9377
23.74	3.64087	4.98193	6.9541	11.1812	16.4341	27.9563
23.84	3.65332	4.99609	6.97046	11.1958	16.4314	27.9646
23.94	3.65869	4.99976	6.98047	11.2083	16.4312	27.9744
24.04	3.65991	4.99072	6.97021	11.2017	16.4453	27.9868
24.14	3.65771	5.00732	6.98022	11.207	16.4536	27.9993
24.24	3.66602	4.99927	6.99268	11.2078	16.4473	28.0039
24.34	3.67163	5.00098	6.99414	11.2124	16.4568	28.0178
24.44	3.66479	5	6.9917	11.2263	16.4651	28.0264
24.54	3.66602	5.00391	7.00024	11.2363	16.4719	28.03
24.64	3.67773	5.02246	7.00391	11.2456	16.4697	28.0229
24.74	3.66284	5.01245	7.00098	11.2471	16.4915	28.0447
24.84	3.68481	5.0271	7.01099	11.2651	16.489	28.0452
24.94	3.68213	5.01538	7.01172	11.2578	16.4927	28.0654
25.04	3.68604	5.03149	7.01685	11.271	16.5029	28.0718
25.14	3.69165	5.03027	7.0188	11.2649	16.5005	28.073
25.24	3.68213	5.04004	7.02002	11.2778	16.5027	28.0728
25.34	3.68115	5.02197	7.02222	11.2646	16.5032	28.0874
25.44	3.67725	5.03442	7.02295	11.2769	16.5193	28.1023
25.54	3.68872	5.04126	7.03442	11.2839	16.5313	28.0999
25.64	3.68188	5.0437	7.02759	11.2861	16.5288	28.1138
25.74	3.6958	5.04126	7.0376	11.2837	16.531	28.123
25.84	3.70483	5.04272	7.03906	11.2969	16.531	28.1184
25.94	3.70361	5.04907	7.04614	11.3032	16.5425	28.1228
26.04	3.70972	5.05054	7.05078	11.3047	16.541	28.1211
26.14	3.70337	5.04565	7.04907	11.303	16.5542	28.1343
26.24	3.70508	5.0542	7.05054	11.3091	16.5486	28.1406
26.34	3.70801	5.05273	7.04907	11.3076	16.5603	28.1404
26.44	3.71509	5.0603	7.05664	11.3145	16.5576	28.1455
26.54	3.70776	5.05786	7.06567	11.3196	16.5647	28.1611
26.64	3.71118	5.05713	7.06982	11.3223	16.5693	28.1726
26.74	3.71704	5.06958	7.07739	11.3384	16.5715	28.1829
26.84	3.71484	5.07178	7.09131	11.3352	16.5769	28.1921
26.94	3.72021	5.06934	7.08911	11.343	16.5793	28.1943
27.04	3.71948	5.07178	7.09131	11.3452	16.5884	28.1995
27.14	3.71216	5.0769	7.09668	11.3428	16.5923	28.2019
27.24	3.72632	5.08081	7.09595	11.353	16.6023	28.2095
27.34	3.72632	5.08325	7.09131	11.353	16.5999	28.2117
27.44	3.72827	5.08838	7.09644	11.3589	16.6099	28.2373
27.54	3.73389	5.09863	7.10645	11.3604	16.6191	28.2302
27.64	3.73877	5.10718	7.10815	11.3738	16.6177	28.2402
27.74	3.72998	5.1001	7.11426	11.3721	16.6306	28.2415
27.84	3.73267	5.10376	7.11548	11.3733	16.6255	28.248
27.94	3.7417	5.09839	7.11572	11.3799	16.6221	28.2595
28.04	3.73682	5.11011	7.12964	11.3796	16.6382	28.2686
28.14	3.73901	5.1145	7.13892	11.3901	16.6377	28.2756
28.24	3.75	5.1084	7.13428	11.3999	16.6367	28.2683
28.34	3.74292	5.10986	7.13281	11.3911	16.6379	28.28
28.44	3.75439	5.11133	7.12842	11.3923	16.6497	28.302
28.54	3.76025	5.12158	7.14111	11.4106	16.6575	28.2993
28.64	3.75049	5.1189	7.14648	11.408	16.6597	28.3093
28.74	3.76221	5.12915	7.14868	11.4104	16.6597	28.3093
28.84	3.76001	5.12598	7.14893	11.4221	16.6807	28.3264
28.94	3.76221	5.13062	7.15479	11.428	16.6721	28.3218
29.04	3.76538	5.12598	7.15332	11.4268	16.676	28.3301
29.14	3.76074	5.12915	7.14868	11.4219	16.6804	28.3496
29.24	3.7666	5.13818	7.15771	11.4312	16.6907	28.3474
29.34	3.77612	5.14063	7.1604	11.4414	16.6836	28.3408
29.44	3.76514	5.13354	7.15771	11.4355	16.6787	28.3359
29.54	3.7688	5.1333	7.14844	11.4333	16.6731	28.3467
29.64	3.76196	5.12646	7.146	11.4387	16.6787	28.3594
29.74	3.77197	5.12866	7.15601	11.4409	16.6995	28.3684
29.84	3.78125	5.14575	7.16528	11.4619	16.698	28.3669
29.94	3.77661	5.14575	7.16064	11.4604	16.6909	28.3713
30.04	3.7688	5.14502	7.16455	11.4502	16.7024	28.3862
30.14	3.77954	5.15503	7.16357	11.4602	16.6995	28.3845
30.24	3.77808	5.14941	7.177	11.4617	16.7056	28.386
30.34	3.77173	5.14404	7.17529	11.468	16.7146	28.4067
30.44	3.79272	5.16626	7.18921	11.4771	16.729	28.4094
30.54	3.78662	5.16675	7.18701	11.4766	16.7146	28.4099
30.64	3.78418	5.15234	7.17529	11.4646	16.7332	28.4182
30.74	3.79712	5.17188	7.18115	11.4839	16.7334	28.4214
30.84	3.80762	5.17188	7.19165	11.4841	16.7363	28.4285
30.94	3.7981	5.16406	7.18213	11.4792	16.7456	28.4375
31.04	3.80029	5.17627	7.1958	11.5002	16.7488	28.4438
31.14	3.79883	5.1748	7.19458	11.4917	16.7407	28.4375
31.24	3.80029	5.17163	7.1958	11.4836	16.7573	28.4453
31.34	3.80029	5.17773	7.19604	11.5002	16.7595	28.4592
31.44	3.81445	5.18262	7.20605	11.5024	16.7617	28.4644
31.54	3.80469	5.18311	7.20044	11.5046	16.7595	28.467
31.64	3.81421	5.17871	7.19824	11.5024	16.7717	28.48
31.74	3.81885	5.18311	7.21069	11.5146	16.7629	28.4744
31.84	3.8103	5.17139	7.21362	11.5061	16.7881	28.4875
31.94	3.82813	5.18774	7.22388	11.5161	16.7832	28.4939
32.04	3.82178	5.18604	7.21753	11.5217	16.791	28.5068
32.14	3.82642	5.20239	7.22998	11.5222	16.791	28.51
32.24	3.83105	5.19946	7.22681	11.5342	16.7957	28.51
32.34	3.82642	5.19067	7.22217	11.5308	16.7861	28.502
32.44	3.8335	5.19775	7.22046	11.5291	16.8074	28.5144
32.54	3.83423	5.20386	7.22266	11.5386	16.8206	28.5364
32.64	3.83423	5.20923	7.24463	11.5603	16.8118	28.5364
32.74	3.83813	5.21411	7.24634	11.5503	16.8149	28.5237
32.84	3.83105	5.20679	7.23438	11.5457	16.8125	28.5354
32.94	3.83789	5.20923	7.23364	11.5408	16.8247	28.5437
33.04	3.84082	5.22144	7.24438	11.5532	16.8342	28.5454
33.14	3.84253	5.21851	7.24609	11.55	16.8379	28.5569
33.24	3.854	5.22534	7.26147	11.5569	16.8367	28.5554
33.34	3.84106	5.22461	7.24463	11.5564	16.8457	28.5645
33.44	3.84961	5.22607	7.25293	11.5662	16.853	28.575
33.54	3.8606	5.24487	7.25635	11.572	16.8489	28.5762
33.64	3.85034	5.23315	7.25366	11.5679	16.8396	28.5747
33.74	3.84082	5.23608	7.24414	11.5576	16.8547	28.5791
33.84	3.85474	5.24219	7.26514	11.5769	16.863	28.5837
33.94	3.8645	5.24023	7.2605	11.575	16.8533	28.5955
34.04	3.85718	5.24072	7.26514	11.5769	16.8572	28.5901
34.14	3.85742	5.23315	7.26001	11.5811	16.8674	28.5938
34.24	3.85718	5.24463	7.26367	11.5793	16.8711	28.5984
34.34	3.84839	5.23193	7.25659	11.5754	16.8696	28.603
34.44	3.85791	5.24536	7.26514	11.5815	16.8867	28.613
34.54	3.87646	5.25244	7.26831	11.5989	16.8914	28.6191
34.64	3.87329	5.2522	7.27661	11.5955	16.8828	28.6248
34.74	3.875	5.24365	7.2832	11.5964	16.8843	28.6245
34.84	3.86621	5.24194	7.27661	11.6025	16.8958	28.6235
34.94	3.86865	5.2522	7.27661	11.5962	16.9063	28.6433
35.04	3.87183	5.24756	7.28223	11.6072	16.8989	28.6323
35.14	3.87646	5.2522	7.28296	11.5986	16.9106	28.646
35.24	3.88086	5.25659	7.28882	11.6108	16.9138	28.6558
35.34	3.88672	5.26709	7.29468	11.6196	16.9082	28.6563
35.44	3.87378	5.26123	7.28906	11.6147	16.9214	28.6724
35.54	3.88721	5.27466	7.30151	11.6257	16.9268	28.675
35.64	3.88428	5.26685	7.29932	11.6194	16.9268	28.6646
35.74	3.8894	5.26831	7.29272	11.6194	16.9324	28.6792
35.84	3.89111	5.28296	7.30615	11.6379	16.9299	28.6826
35.94	3.89429	5.27466	7.29761	11.6375	16.9346	28.6885
36.04	3.8855	5.27271	7.30518	11.634	16.9495	28.7061
36.14	3.89893	5.28638	7.32104	11.646	16.9495	28.7019
36.24	3.88867	5.28638	7.30371	11.6418	16.9492	28.6885
36.34	3.89233	5.27271	7.30347	11.6387	16.9609	28.7056
36.44	3.9104	5.28589	7.30908	11.6533	16.9563	28.709
36.54	3.90747	5.28613	7.31055	11.6443	16.9583	28.7039
36.64	3.90332	5.28833	7.31128	11.6462	16.9639	28.7131
36.74	3.89868	5.29297	7.3103	11.6533	16.9805	28.7305
36.84	3.9165	5.29541	7.323	11.6582	16.9724	28.7412
36.94	3.92212	5.30225	7.3208	11.6636	16.9685	28.7327
37.04	3.91016	5.29053	7.31494	11.658	16.9802	28.7388
37.14	3.9126	5.30396	7.323	11.6658	16.9802	28.7444
37.24	3.91016	5.29297	7.33398	11.665	16.9832	28.7449
37.34	3.91479	5.2937	7.32837	11.668	16.9895	28.7537
37.44	3.91504	5.2998	7.323	11.6729	16.9902	28.7668
37.54	3.91797	5.30542	7.33765	11.6726	17.0042	28.7695
37.64	3.92407	5.31519	7.34155	11.6772	17.0112	28.7832
37.74	3.94141	5.32886	7.34155	11.6963	17.012	28.7893
37.84	3.93579	5.32153	7.34229	11.6921	17.0229	28.79
37.94	3.93677	5.32153	7.34155	11.696	17.0144	28.7759
38.04	3.93115	5.30542	7.33691	11.6921	17.019	28.7954
38.14	3.92969	5.31299	7.34082	11.6907	17.0234	28.7876
38.24	3.93433	5.31909	7.33887	11.6895	17.0293	28.7876
38.34	3.93433	5.31689	7.34473	11.6992	17.0281	28.792
38.44	3.92725	5.31909	7.35083	11.7014	17.0337	28.8108
38.54	3.93799	5.32397	7.35156	11.7061	17.0515	28.8186
38.64	3.95068	5.323	7.35083	11.7131	17.0486	28.8101
38.74	3.94434	5.32471	7.35229	11.7068	17.0383	28.8184
38.84	3.9458	5.33154	7.35938	11.71	17.0459	28.8262
38.94	3.95337	5.33057	7.36621	11.7251	17.05	28.8262
39.04	3.95825	5.33301	7.37109	11.7256	17.0505	28.8308
39.14	3.95361	5.32593	7.36304	11.7207	17.0615	28.8376
39.24	3.95752	5.33154	7.37085	11.7253	17.0696	28.8496
39.34	3.96533	5.34253	7.38184	11.7324	17.0693	28.8455
39.44	3.95361	5.33936	7.37891	11.7378	17.074	28.854
39.54	3.95801	5.34229	7.36987	11.7439	17.0835	28.8596
39.64	3.96777	5.33618	7.37573	11.7371	17.074	28.8499
39.74	3.95801	5.33765	7.37549	11.7307	17.0818	28.8647
39.84	3.96118	5.33618	7.38086	11.7471	17.0881	28.8689
39.94	3.97388	5.33765	7.39185	11.7495	17.0723	28.8601
40.04	3.96362	5.33618	7.38794	11.7424	17.0933	28.8694
40.14	3.96973	5.34375	7.3833	11.75	17.1038	28.8835
40.24	3.97314	5.35718	7.39258	11.7705	17.0901	28.8779
40.34	3.97827	5.34546	7.39648	11.7656	17.0989	28.8833
40.44	3.97534	5.35229	7.39966	11.7571	17.0884	28.8879
40.54	3.97681	5.35083	7.40186	11.7617	17.0894	28.884
40.64	3.9729	5.3501	7.39722	11.7695	17.1003	28.8911
40.74	3.96509	5.35083	7.39038	11.7617	17.1079	28.9048
40.84	3.97656	5.34985	7.39697	11.7734	17.1121	28.9099
40.94	3.97998	5.35938	7.40674	11.7734	17.1082	28.905
41.04	3.98218	5.36157	7.39941	11.7742	17.1196	28.9175
41.14	3.99634	5.37036	7.40723	11.793	17.1113	28.9033
41.24	3.98315	5.36011	7.4104	11.7798	17.1204	28.9197
41.34	3.98535	5.36792	7.4165	11.7903	17.1228	28.9221
41.44	3.99634	5.36011	7.42139	11.7959	17.1252	28.9126
41.54	3.98926	5.36475	7.4165	11.8022	17.1299	28.9221
41.64	3.98779	5.37183	7.41748	11.803	17.1321	28.9297
41.74	3.99927	5.375	7.42358	11.8091	17.1506	28.9553
41.84	4.00537	5.38086	7.43066	11.824	17.147	28.946
41.94	4.00415	5.38208	7.42676	11.8203	17.1477	28.9531
42.04	4.00317	5.37622	7.43066	11.8193	17.1421	28.9536
42.14	3.99683	5.37939	7.43115	11.813	17.1499	28.9653
42.24	4.00635	5.38965	7.44067	11.8271	17.1563	28.9614
42.34	4.00146	5.37695	7.43604	11.8247	17.1538	28.9653
42.44	3.99927	5.39111	7.43677	11.8271	17.1631	28.9731
42.54	4.01318	5.39111	7.44751	11.8408	17.1685	28.9768
42.64	4.01782	5.39111	7.44995	11.834	17.1755	28.9863
42.74	4.01318	5.39111	7.43823	11.8293	17.1702	28.9871
42.84	4.01807	5.39111	7.45313	11.834	17.1777	28.9861
42.94	4.01294	5.39111	7.44751	11.8291	17.1702	28.9873
43.04	4.01807	5.39111	7.44531	11.842	17.1687	28.9885
43.14	4.01563	5.39355	7.44531	11.8315	17.1675	28.9893
43.24	4.00366	5.38843	7.4458	11.8362	17.188	28.9993
43.34	4.01147	5.39404	7.45752	11.8464	17.1902	29.0042
43.44	4.02026	5.39893	7.4624	11.844	17.1973	29.0156
43.54	4.01855	5.39551	7.4646	11.8511	17.2019	29.0039
43.64	4.02319	5.39868	7.46216	11.854	17.2041	29.0203
43.74	4.02783	5.40259	7.45288	11.8555	17.2019	29.0156
43.84	4.01855	5.39868	7.45068	11.8557	17.2041	29.0195
43.94	4.02002	5.40723	7.45679	11.8618	17.2017	29.0186
44.04	4.01538	5.40576	7.45044	11.8555	17.2075	29.0352
44.14	4.0188	5.41064	7.46484	11.8652	17.2063	29.0247
44.24	4.02002	5.4104	7.46216	11.8601	17.2087	29.0374
44.34	4.01855	5.4104	7.4646	11.8611	17.209	29.0327
44.44	4.02026	5.41064	7.4624	11.8604	17.2087	29.0374
44.54	4.01563	5.4104	7.46143	11.8611	17.2119	29.0356
44.64	4.00684	5.40186	7.46069	11.8633	17.2134	29.0496
44.74	4.0083	5.40308	7.4541	11.8672	17.2197	29.0591
44.84	4.02344	5.41821	7.47705	11.8774	17.2251	29.0615
44.94	4.0271	5.42212	7.48096	11.8789	17.2197	29.0588
45.04	4.03101	5.41797	7.47705	11.8774	17.228	29.0659
45.14	4.03003	5.42969	7.48389	11.8818	17.2258	29.062
45.24	4.02783	5.42993	7.46997	11.8782	17.2307	29.0659
45.34	4.03491	5.42993	7.47705	11.8821	17.2373	29.0852
45.44	4.03931	5.44141	7.48535	11.8896	17.2383	29.0735
45.54	4.03003	5.42969	7.47217	11.8865	17.2522	29.0884
45.64	4.04248	5.4375	7.48853	11.9043	17.2593	29.0945
45.74	4.04663	5.44604	7.49341	11.9146	17.2476	29.0876
45.84	4.03467	5.44141	7.48779	11.9006	17.2576	29.0928
45.94	4.04639	5.44849	7.4917	11.9043	17.2529	29.1023
46.04	4.04272	5.44214	7.49341	11.9092	17.2703	29.1072
46.14	4.04272	5.45166	7.48853	11.9092	17.2637	29.106
46.24	4.04639	5.45068	7.48853	11.9143	17.2671	29.1033
46.34	4.04272	5.44141	7.48877	11.9233	17.2639	29.1062
46.44	4.04663	5.45313	7.48853	11.9224	17.2739	29.103
46.54	4.04248	5.44141	7.48853	11.9231	17.2747	29.1091
46.64	4.04956	5.44434	7.4917	11.9253	17.2932	29.1238
46.74	4.06201	5.46851	7.50781	11.9426	17.2793	29.124
46.84	4.05566	5.44604	7.4978	11.9302	17.2935	29.1355
46.94	4.06445	5.4563	7.5105	11.9355	17.291	29.1355
47.04	4.05566	5.45752	7.50928	11.937	17.2935	29.1357
47.14	4.0647	5.45239	7.50659	11.9358	17.2878	29.1355
47.24	4.05591	5.4624	7.50952	11.9373	17.3013	29.1479
47.34	4.06592	5.46387	7.50781	11.9519	17.3096	29.1533
47.44	4.06909	5.47241	7.51489	11.9519	17.3059	29.1526
47.54	4.0708	5.46875	7.5127	11.9521	17.3057	29.155
47.64	4.06592	5.46802	7.51514	11.9519	17.3127	29.1653
47.74	4.06836	5.46069	7.51489	11.9543	17.322	29.1477
47.84	4.06348	5.46533	7.50854	11.9495	17.3252	29.166
47.94	4.07227	5.47583	7.52295	11.9583	17.3291	29.1711
48.04	4.0752	5.46851	7.51733	11.9612	17.322	29.1594
48.14	4.06909	5.46533	7.51489	11.9565	17.3391	29.1728
48.24	4.08545	5.48022	7.52734	11.9736	17.3345	29.1719
48.34	4.07861	5.48022	7.5354	11.969	17.3472	29.1846
48.44	4.07617	5.48022	7.53906	11.9739	17.3499	29.1833
48.54	4.0752	5.48413	7.54053	11.9727	17.3484	29.1858
48.64	4.07373	5.48022	7.5415	11.9697	17.3518	29.1892
48.74	4.08081	5.4834	7.5437	11.9761	17.3564	29.197
48.84	4.08154	5.48804	7.54541	11.9907	17.353	29.1951
48.94	4.08545	5.4895	7.54834	11.9907	17.3516	29.1921
49.04	4.0769	5.49023	7.54517	11.9907	17.3562	29.198
49.14	4.07813	5.49243	7.55127	11.9939	17.364	29.2014
49.24	4.08154	5.49976	7.55151	11.9954	17.3679	29.2131
49.34	4.08545	5.49951	7.55396	11.9907	17.3694	29.2144
49.44	4.08521	5.50342	7.55518	11.9946	17.3665	29.2156
49.54	4.08154	5.49976	7.56177	11.9907	17.3679	29.2129
49.64	4.08545	5.49805	7.55859	11.9893	17.3755	29.2129
49.74	4.0813	5.49707	7.56323	11.9883	17.3723	29.2292
49.84	4.08984	5.50415	7.56152	12.0068	17.3857	29.2278
49.94	4.08838	5.50952	7.56616	12.0007	17.385	29.2324
50.04	4.09326	5.50879	7.56641	12.0117	17.3975	29.2363
50.14	4.09717	5.51367	7.57007	12.0125	17.3997	29.2354
50.24	4.09619	5.51196	7.5708	12.0146	17.3989	29.2407
50.34	4.10156	5.51489	7.57715	12.0139	17.3918	29.2488
50.44	4.0979	5.50732	7.5708	12.0056	17.3989	29.2556
50.54	4.10498	5.51587	7.57788	12.0115	17.395	29.2517
50.64	4.1001	5.50977	7.57788	12.0085	17.4021	29.2556
50.74	4.10083	5.51172	7.58081	12.0146	17.4099	29.262
50.84	4.10815	5.52222	7.58569	12.0295	17.4043	29.261
50.94	4.10254	5.52368	7.58252	12.0295	17.4092	29.2659
51.04	4.10718	5.52271	7.58496	12.0288	17.4041	29.261
51.14	4.10229	5.5188	7.58228	12.0193	17.4216	29.2751
51.24	4.10815	5.52368	7.58643	12.0288	17.4263	29.2737
51.34	4.11255	5.52905	7.58813	12.0295	17.4275	29.2725
51.44	4.11401	5.53979	7.59863	12.0295	17.4285	29.2827
51.54	4.11499	5.53052	7.5957	12.0293	17.4231	29.2827
51.64	4.11401	5.54248	7.59888	12.031	17.4263	29.2827
51.74	4.11499	5.53833	7.59277	12.032	17.4246	29.2781
51.84	4.10791	5.52905	7.58789	12.0364	17.4275	29.2749
51.94	4.1062	5.53979	7.58691	12.0339	17.4294	29.2874
52.04	4.10791	5.53369	7.59277	12.0413	17.4458	29.293
52.14	4.11255	5.55005	7.59717	12.0413	17.4424	29.2998
52.24	4.11255	5.53833	7.59863	12.041	17.4377	29.3013
52.34	4.1123	5.53809	7.59961	12.041	17.4407	29.2949
52.44	4.11694	5.55054	7.5979	12.0403	17.447	29.314
52.54	4.12427	5.56177	7.60889	12.0503	17.4597	29.3176
52.64	4.12354	5.56152	7.60889	12.0527	17.4534	29.3123
52.74	4.11255	5.56006	7.61206	12.0513	17.4539	29.3113
52.84	4.11621	5.55908	7.59717	12.062	17.4487	29.3215
52.94	4.11719	5.56177	7.60962	12.0637	17.4573	29.3286
53.04	4.1228	5.5603	7.62061	12.0723	17.4648	29.3262
53.14	4.12158	5.55518	7.6167	12.0652	17.4648	29.3237
53.24	4.12402	5.56006	7.61646	12.0627	17.4648	29.3337
53.34	4.1272	5.55835	7.61963	12.061	17.4666	29.3425
53.44	4.1333	5.57861	7.62598	12.0684	17.479	29.355
53.54	4.13818	5.57178	7.62744	12.072	17.478	29.354
53.64	4.12866	5.57861	7.62109	12.0813	17.479	29.355
53.74	4.12402	5.57153	7.62744	12.0823	17.4775	29.3525
53.84	4.12744	5.58179	7.61987	12.0801	17.4836	29.3525
53.94	4.13184	5.58423	7.62817	12.0801	17.4766	29.3523
54.04	4.12402	5.56934	7.61792	12.072	17.4846	29.3604
54.14	4.13208	5.56934	7.63867	12.0801	17.4814	29.3604
54.24	4.14111	5.57861	7.63379	12.0762	17.4915	29.3767
54.34	4.13892	5.58423	7.64331	12.0847	17.4961	29.3789
54.44	4.15063	5.58105	7.64307	12.0986	17.4978	29.3735
54.54	4.14526	5.58887	7.6377	12.0815	17.5103	29.386
54.64	4.146	5.58105	7.63867	12.0942	17.5085	29.3843
54.74	4.14429	5.58887	7.64063	12.0923	17.5161	29.3921
54.84	4.15527	5.58105	7.64771	12.1033	17.5107	29.3938
54.94	4.15137	5.58862	7.65552	12.0994	17.5227	29.3914
55.04	4.15063	5.57959	7.65503	12.0989	17.5156	29.3914
55.14	4.14819	5.59033	7.64917	12.0916	17.52	29.3958
55.24	4.15527	5.59326	7.65088	12.104	17.5271	29.4146
55.34	4.15527	5.60278	7.65942	12.1018	17.5383	29.4141
55.44	4.15845	5.59668	7.65869	12.1118	17.5435	29.4146
55.54	4.15991	5.59741	7.67188	12.1157	17.5303	29.4106
55.64	4.15527	5.58398	7.64771	12.1064	17.5513	29.427
55.74	4.15527	5.5979	7.66724	12.1201	17.5391	29.4226
55.84	4.15527	5.59131	7.65942	12.1213	17.5452	29.4326
55.94	4.16162	5.59668	7.66724	12.1306	17.5325	29.4199
56.04	4.15283	5.59351	7.65552	12.1157	17.5498	29.4419
56.14	4.16748	5.60352	7.66699	12.1257	17.5498	29.4324
56.24	4.16528	5.59644	7.65845	12.1187	17.5518	29.4392
56.34	4.16748	5.60962	7.67163	12.1265	17.5513	29.4463
56.44	4.15601	5.60352	7.67188	12.1235	17.5569	29.4519
56.54	4.16528	5.60815	7.67725	12.1375	17.5635	29.4463
56.64	4.1604	5.60498	7.67627	12.1279	17.5684	29.4534
56.74	4.16211	5.60352	7.67725	12.1328	17.5669	29.4529
56.84	4.15918	5.60815	7.67969	12.1313	17.5747	29.458
56.94	4.17944	5.60815	7.68335	12.1467	17.5684	29.4534
57.04	4.16528	5.61987	7.6936	12.1328	17.5737	29.4595
57.14	4.17065	5.60791	7.6897	12.1382	17.5735	29.4624
57.24	4.17603	5.61963	7.68799	12.1379	17.5784	29.4612
57.34	4.17773	5.61987	7.6897	12.1428	17.5808	29.4714
57.44	4.18237	5.61987	7.69824	12.1499	17.5862	29.4702
57.54	4.18237	5.61572	7.70288	12.1497	17.5969	29.489
57.64	4.18701	5.62427	7.70142	12.166	17.5972	29.4917
57.74	4.1936	5.62695	7.70996	12.1687	17.605	29.4805
57.84	4.18237	5.61987	7.70605	12.1616	17.6018	29.4773
57.94	4.18701	5.61279	7.70288	12.1543	17.604	29.4946
58.04	4.18481	5.62671	7.71704	12.1638	17.5972	29.49
58.14	4.19189	5.61279	7.70752	12.1592	17.5972	29.4993
58.24	4.18164	5.62695	7.7085	12.1719	17.6094	29.4954
58.34	4.18701	5.62451	7.71069	12.1575	17.615	29.4998
58.44	4.18481	5.62988	7.71606	12.1692	17.614	29.509
58.54	4.19165	5.625	7.71509	12.1589	17.6196	29.5186
58.64	4.19385	5.63452	7.71753	12.176	17.6313	29.5188
58.74	4.19653	5.6394	7.72803	12.1809	17.6257	29.5208
58.84	4.19165	5.63599	7.72681	12.1809	17.6267	29.5217
58.94	4.19629	5.62988	7.72925	12.1763	17.6367	29.5239
59.04	4.19458	5.63208	7.72852	12.1816	17.6328	29.5278
59.14	4.19873	5.62744	7.72705	12.1809	17.6267	29.5217
59.24	4.18945	5.62744	7.72803	12.1809	17.6248	29.5239
59.34	4.18994	5.63208	7.72534	12.177	17.6357	29.541
59.44	4.19385	5.64941	7.73706	12.1792	17.6436	29.5361
59.54	4.18994	5.63184	7.72998	12.186	17.6484	29.5505
59.64	4.20654	5.6438	7.73267	12.1934	17.6577	29.5542
59.74	4.2041	5.64624	7.73706	12.2029	17.6528	29.5503
59.84	4.21094	5.63916	7.73706	12.1931	17.6624	29.562
59.94	4.21265	5.63916	7.73706	12.1924	17.6582	29.5649
60.04	4.20483	5.64209	7.73755	12.1917	17.6646	29.5713
60.14	4.21094	5.64844	7.74878	12.2097	17.6733	29.5769
60.24	4.21338	5.65405	7.75195	12.2034	17.6794	29.5728
60.34	4.21655	5.6438	7.74951	12.208	17.6831	29.5828
60.44	4.22632	5.66235	7.76025	12.2166	17.6748	29.5801
60.54	4.22363	5.65869	7.75659	12.2122	17.6655	29.5698
60.64	4.20874	5.64941	7.75195	12.1987	17.6794	29.5813
60.74	4.2063	5.64697	7.75195	12.2126	17.6792	29.5789
60.84	4.22119	5.64819	7.75415	12.2197	17.677	29.5913
60.94	4.21338	5.64917	7.75562	12.2151	17.6753	29.5935
61.04	4.22095	5.65137	7.7478	12.2124	17.6941	29.5977
61.14	4.22119	5.65552	7.76587	12.2197	17.6941	29.5994
61.24	4.22119	5.65698	7.76416	12.2275	17.6987	29.6052
61.34	4.22559	5.65918	7.77124	12.2275	17.7173	29.6123
61.44	4.23657	5.67163	7.77271	12.2312	17.7175	29.6204
61.54	4.22827	5.66895	7.77612	12.2275	17.7175	29.6169
61.64	4.22656	5.66699	7.77979	12.2329	17.709	29.6123
61.74	4.23511	5.65845	7.77588	12.2417	17.7102	29.627
61.84	4.2373	5.66553	7.77979	12.239	17.7161	29.6201
61.94	4.22827	5.65405	7.76685	12.2314	17.7229	29.6396
62.04	4.23291	5.66797	7.77368	12.2393	17.7283	29.6318
62.14	4.22583	5.65381	7.77271	12.2439	17.7329	29.6277
62.24	4.22803	5.66626	7.77441	12.2461	17.7329	29.6426
62.34	4.2373	5.65845	7.77588	12.2422	17.7458	29.6526
62.44	4.24438	5.67017	7.78906	12.2483	17.7468	29.6497
62.54	4.24438	5.66626	7.78589	12.2461	17.7493	29.6589
62.64	4.2478	5.67017	7.79224	12.2539	17.7524	29.6565
62.74	4.24902	5.66772	7.79224	12.2561	17.7515	29.6626
62.84	4.24438	5.68042	7.79785	12.2703	17.749	29.6658
62.94	4.23584	5.6748	7.79199	12.2656	17.7627	29.6785
63.04	4.25244	5.68506	7.80566	12.2734	17.7537	29.6707
63.14	4.24902	5.66626	7.79297	12.26	17.7664	29.6775
63.24	4.24292	5.67017	7.79468	12.261	17.7615	29.668
63.34	4.24194	5.66309	7.79663	12.2678	17.7725	29.6853
63.44	4.24902	5.66553	7.79468	12.2703	17.7742	29.6899
63.54	4.26245	5.66626	7.80713	12.2688	17.7834	29.6899
63.64	4.26392	5.68262	7.8103	12.271	17.7849	29.6978
63.74	4.26147	5.6897	7.81152	12.2793	17.7856	29.7014
63.84	4.26636	5.68481	7.80688	12.292	17.7925	29.699
63.94	4.25659	5.6792	7.8147	12.2825	17.7952	29.7134
64.04	4.26855	5.68506	7.82349	12.2866	17.7976	29.7117
64.14	4.27417	5.6897	7.82593	12.2922	17.8027	29.7092
64.24	4.27173	5.68506	7.81323	12.2927	17.8042	29.7178
64.34	4.26855	5.67773	7.81616	12.291	17.8098	29.7124
64.44	4.26709	5.69043	7.82666	12.293	17.8027	29.7092
64.54	4.26001	5.67651	7.81494	12.2974	17.8113	29.7209
64.64	4.26855	5.68726	7.81885	12.2896	17.8098	29.7217
64.74	4.26855	5.68945	7.8147	12.2974	17.8145	29.7356
64.84	4.27393	5.68945	7.8186	12.2974	17.8096	29.7253
64.94	4.2644	5.68091	7.81006	12.2939	17.8237	29.7405
65.04	4.28027	5.69409	7.83594	12.3091	17.8245	29.7356
65.14	4.26245	5.69263	7.82178	12.3091	17.8345	29.7449
65.24	4.27637	5.70508	7.82959	12.324	17.8306	29.7402
65.34	4.2832	5.69873	7.83569	12.3135	17.8259	29.752
65.44	4.2832	5.69971	7.8335	12.3206	17.8372	29.748
65.54	4.28345	5.70215	7.83105	12.3208	17.8408	29.7505
65.64	4.28345	5.70435	7.83667	12.3193	17.8313	29.7573
65.74	4.29102	5.69727	7.84351	12.3145	17.8408	29.7598
65.84	4.29956	5.7019	7.84985	12.3237	17.8337	29.7581
65.94	4.29346	5.70435	7.83643	12.3284	17.8533	29.7722
66.04	4.29907	5.70972	7.85059	12.3364	17.8416	29.7688
66.14	4.29272	5.70898	7.84277	12.3376	17.8455	29.7815
66.24	4.302	5.70435	7.84839	12.3425	17.8533	29.7791
66.34	4.29419	5.7019	7.84668	12.3362	17.853	29.7803
66.44	4.3042	5.70874	7.85767	12.3416	17.853	29.7891
66.54	4.2981	5.71655	7.84888	12.3386	17.8579	29.7869
66.64	4.2981	5.7207	7.85059	12.3479	17.8713	29.7869
66.74	4.29883	5.71533	7.86548	12.344	17.8694	29.7954
66.84	4.30737	5.71802	7.86548	12.3479	17.8577	29.782
66.94	4.29956	5.71338	7.86523	12.3408	17.8752	29.7908
67.04	4.30542	5.71924	7.86938	12.3472	17.8743	29.7954
67.14	4.29565	5.71362	7.86548	12.3494	17.8765	29.7937
67.24	4.29956	5.71362	7.86938	12.355	17.8828	29.7983
67.34	4.31299	5.72681	7.86548	12.3596	17.885	29.803
67.44	4.31519	5.72119	7.87695	12.3628	17.8811	29.8103
67.54	4.31152	5.72534	7.86548	12.3643	17.896	29.8171
67.64	4.31299	5.71924	7.8772	12.3713	17.8843	29.7998
67.74	4.31201	5.71826	7.8772	12.3564	17.884	29.8086
67.84	4.2981	5.71191	7.86841	12.3464	17.8992	29.8062
67.94	4.30615	5.71216	7.87012	12.3525	17.8992	29.8101
68.04	4.31079	5.7168	7.8772	12.3699	17.8936	29.8179
68.14	4.30737	5.71802	7.88501	12.365	17.8872	29.8108
68.24	4.30737	5.71191	7.86523	12.3594	17.9036	29.8169
68.34	4.31299	5.72363	7.87695	12.3594	17.9036	29.8223
68.44	4.31055	5.72119	7.87305	12.3704	17.9036	29.8291
68.54	4.31201	5.72803	7.87695	12.3804	17.9163	29.8418
68.64	4.32227	5.73291	7.88965	12.3823	17.9185	29.8513
68.74	4.32471	5.73535	7.89185	12.386	17.9167	29.8457
68.84	4.32373	5.72827	7.88867	12.3804	17.9255	29.8489
68.94	4.32935	5.72827	7.88477	12.386	17.9275	29.8525
69.04	4.32935	5.74292	7.90112	12.3821	17.9346	29.8486
69.14	4.33154	5.74512	7.90479	12.3882	17.9231	29.8535
69.24	4.32227	5.73999	7.89185	12.3789	17.9348	29.8557
69.34	4.32617	5.73999	7.90039	12.3892	17.9302	29.8472
69.44	4.33252	5.74634	7.89502	12.3867	17.926	29.8611
69.54	4.33008	5.74756	7.90405	12.3911	17.9399	29.8657
69.64	4.3313	5.74512	7.90161	12.406	17.9341	29.8682
69.74	4.32544	5.74316	7.89648	12.3984	17.938	29.8706
69.84	4.33716	5.7478	7.89502	12.3984	17.9321	29.8694
69.94	4.33545	5.74438	7.90576	12.3953	17.9392	29.8828
70.04	4.33398	5.74292	7.91138	12.3936	17.9568	29.887
70.14	4.33643	5.75952	7.91138	12.4102	17.947	29.8774
70.24	4.33154	5.75244	7.91357	12.4031	17.947	29.8799
70.34	4.33398	5.74438	7.91284	12.3938	17.9565	29.8782
70.44	4.33252	5.75	7.91528	12.3982	17.9548	29.8882
70.54	4.33472	5.7522	7.91895	12.4106	17.9612	29.8948
70.64	4.34888	5.75488	7.92773	12.4204	17.9502	29.8835
70.74	4.33936	5.75537	7.92383	12.4109	17.9666	29.8999
70.84	4.34888	5.76001	7.92383	12.4224	17.957	29.8945
70.94	4.33716	5.75464	7.91602	12.4202	17.9585	29.8889
71.04	4.34326	5.74756	7.92432	12.4146	17.9688	29.8977
71.14	4.34399	5.74756	7.91431	12.406	17.9666	29.8992
71.24	4.34644	5.7627	7.92847	12.4211	17.9736	29.9084
71.34	4.34644	5.76001	7.92065	12.4224	17.9851	29.9138
71.44	4.34888	5.76392	7.93066	12.4224	17.9734	29.9185
71.54	4.35352	5.75928	7.92749	12.4202	17.9812	29.9185
71.64	4.34937	5.77026	7.92358	12.4302	17.9736	29.9187
71.74	4.35352	5.77563	7.92529	12.4341	17.9851	29.9304
71.84	4.34888	5.771	7.92993	12.4333	17.9883	29.9263
71.94	4.35425	5.77026	7.93994	12.4443	17.9883	29.9302
72.04	4.36499	5.77881	7.94238	12.4443	17.9905	29.938
72.14	4.36108	5.7832	7.9353	12.4385	17.9858	29.9263
72.24	4.35352	5.77026	7.94019	12.4326	17.9954	29.938
72.34	4.36523	5.77881	7.94263	12.4443	17.9976	29.938
72.44	4.35815	5.7749	7.9353	12.4348	17.9976	29.938
72.54	4.35645	5.77856	7.95166	12.4441	17.9954	29.9377
72.64	4.35327	5.76685	7.94238	12.4487	18.0005	29.9526
72.74	4.36108	5.79102	7.95166	12.4565	18.0022	29.9473
72.84	4.35352	5.79053	7.94409	12.449	18.0071	29.9565
72.94	4.36523	5.78564	7.94946	12.449	18.0054	29.9526
73.04	4.36133	5.7793	7.94775	12.4565	18.0208	29.9705
73.14	4.36646	5.78711	7.95557	12.4619	18.0107	29.9641
73.24	4.37524	5.78882	7.95728	12.459	18.0171	29.9736
73.34	4.37305	5.79126	7.95508	12.4731	18.0193	29.9675
73.44	4.36523	5.78882	7.94727	12.4636	18.0215	29.9736
73.54	4.37305	5.79565	7.96338	12.4683	18.0193	29.9617
73.64	4.3728	5.7981	7.9502	12.4729	18.0271	29.9751
73.74	4.3689	5.7981	7.96265	12.4636	18.0247	29.9766
73.84	4.3728	5.80127	7.96655	12.4712	18.0205	29.9663
73.94	4.36108	5.79077	7.95459	12.4656	18.0271	29.9917
74.04	4.3855	5.80273	7.97119	12.4878	18.0317	29.9836
74.14	4.38013	5.79663	7.97363	12.48	18.0356	29.9812
74.24	4.37598	5.80273	7.97119	12.4832	18.0315	29.9961
74.34	4.38208	5.81421	7.97437	12.4844	18.0432	29.9912
74.44	4.37988	5.80811	7.9812	12.4797	18.0317	29.9812
74.54	4.36597	5.80273	7.97119	12.4832	18.0317	29.9961
74.64	4.37939	5.80127	7.9729	12.4839	18.0432	29.9929
74.74	4.37744	5.80566	7.979	12.4846	18.0479	29.9951
74.84	4.37744	5.81421	7.98291	12.4946	18.0503	30.0076
74.94	4.38306	5.81274	7.9812	12.4954	18.0466	29.9961
75.04	4.36914	5.79883	7.97754	12.4878	18.0527	30.0076
75.14	4.38232	5.80957	7.98755	12.4878	18.0627	30.0122
75.24	4.38452	5.82202	7.98608	12.5	18.0652	30.0146
75.34	4.38306	5.82764	7.98438	12.511	18.0603	30.0154
75.44	4.38989	5.82202	7.99121	12.5039	18.0745	30.0239
75.54	4.39624	5.82202	7.99756	12.5142	18.0728	30.0222
75.64	4.39063	5.83228	7.99365	12.5186	18.0752	30.0317
75.74	4.39307	5.83228	8.00098	12.522	18.0791	30.0271
75.84	4.38916	5.82666	8.0022	12.5117	18.0745	30.0261
75.94	4.39624	5.83154	7.99756	12.511	18.0776	30.0315
76.04	4.39551	5.8252	7.99756	12.5188	18.0894	30.0371
76.14	4.39941	5.83691	8.00806	12.5173	18.0798	30.0361
76.24	4.38989	5.83447	8.00317	12.5164	18.0774	30.0269
76.34	4.39233	5.83228	8.00098	12.522	18.0937	30.0371
76.44	4.39478	5.83228	8.00073	12.522	18.0867	30.0361
76.54	4.38525	5.83447	8.00293	12.5161	18.0894	30.0503
76.64	4.3894	5.84082	8.01025	12.5234	18.1018	30.0449
76.74	4.38794	5.83545	8.01587	12.5369	18.1016	30.0588
76.84	4.38379	5.84155	8.01318	12.5344	18.1133	30.0664
76.94	4.3938	5.84546	8.01855	12.5398	18.114	30.0625
77.04	4.40869	5.85156	8.03198	12.5498	18.1086	30.0681
77.14	4.39941	5.84448	8.0249	12.5366	18.1177	30.0657
77.24	4.39917	5.85303	8.03638	12.5427	18.1211	30.0671
77.34	4.40161	5.85645	8.03662	12.543	18.1204	30.0798
77.44	4.41113	5.85571	8.03662	12.5483	18.1257	30.0735
77.54	4.40723	5.86084	8.03662	12.5505	18.1282	30.0852
77.64	4.41187	5.86646	8.03491	12.5576	18.124	30.0806
77.74	4.41162	5.8562	8.03711	12.5576	18.1418	30.0896
77.84	4.41162	5.86548	8.04883	12.5691	18.1328	30.0898
77.94	4.4165	5.86816	8.04126	12.5623	18.1431	30.0991
78.04	4.41895	5.87036	8.05542	12.5796	18.1421	30.0942
78.14	4.41187	5.86548	8.04419	12.5701	18.1443	30.1084
78.24	4.42798	5.86792	8.05273	12.574	18.1443	30.0964
78.34	4.42334	5.85864	8.04663	12.5762	18.1436	30.0996
78.44	4.42651	5.86865	8.052	12.5684	18.1492	30.113
78.54	4.42822	5.87256	8.05762	12.5786	18.1523	30.1162
78.64	4.42334	5.86792	8.05151	12.5725	18.1521	30.1191
78.74	4.43823	5.88281	8.05908	12.5801	18.1545	30.1277
78.84	4.43823	5.88721	8.06372	12.5886	18.1599	30.1355
78.94	4.43188	5.89038	8.06372	12.5847	18.1614	30.1353
79.04	4.44287	5.89185	8.06372	12.5979	18.1641	30.1479
79.14	4.43896	5.8999	8.06836	12.6038	18.1506	30.1426
79.24	4.43115	5.89453	8.07544	12.5918	18.1646	30.1401
79.34	4.44604	5.89063	8.07544	12.5894	18.1685	30.155
79.44	4.4436	5.90454	8.08325	12.6042	18.1667	30.1587
79.54	4.44727	5.90674	8.0918	12.6082	18.1792	30.1548
79.64	4.45044	5.90527	8.09009	12.604	18.1841	30.1667
79.74	4.45776	5.90771	8.09033	12.6191	18.1802	30.1667
79.84	4.44751	5.90845	8.09644	12.6128	18.1858	30.1619
79.94	4.45459	5.91772	8.09424	12.6082	18.1792	30.1594
80.04	4.45068	5.90991	8.08643	12.6189	18.1846	30.175
80.14	4.45435	5.91992	8.09155	12.6289	18.198	30.1697
80.24	4.45508	5.91846	8.09937	12.6274	18.1865	30.1667
80.34	4.46094	5.91699	8.09033	12.616	18.1833	30.1736
80.44	4.4624	5.91455	8.08716	12.6262	18.1909	30.1658
80.54	4.45825	5.91455	8.0979	12.6235	18.1909	30.1833
80.64	4.46362	5.91455	8.104	12.625	18.2073	30.1943
80.74	4.46924	5.9231	8.11816	12.6345	18.2061	30.1931
80.84	4.46558	5.93335	8.11694	12.6426	18.2026	30.1978
80.94	4.46362	5.92773	8.11133	12.637	18.2151	30.2024
81.04	4.47705	5.93335	8.11108	12.6504	18.2175	30.2163
81.14	4.47705	5.93335	8.12842	12.6541	18.2073	30.2007
81.24	4.4668	5.93091	8.11426	12.6399	18.2224	30.2148
81.34	4.47876	5.93823	8.11206	12.6519	18.2175	30.2124
81.44	4.47241	5.93335	8.11694	12.6509	18.2151	30.2085
81.54	4.47461	5.93872	8.12695	12.6501	18.2307	30.2263
81.64	4.48169	5.94263	8.13062	12.668	18.2246	30.2241
81.74	4.48877	5.94043	8.12988	12.6658	18.2346	30.2278
81.84	4.48633	5.93848	8.14087	12.6616	18.229	30.2246
81.94	4.48145	5.93628	8.12915	12.6663	18.2332	30.2327
82.04	4.49268	5.95361	8.13843	12.6743	18.2393	30.2339
82.14	4.48633	5.94336	8.13379	12.6665	18.2415	30.2434
82.24	4.49805	5.9541	8.14551	12.6711	18.2415	30.2512
82.34	4.49976	5.95581	8.1416	12.6814	18.2532	30.2488
82.44	4.50098	5.96509	8.14551	12.6812	18.2495	30.249
82.54	4.49878	5.9668	8.15332	12.6836	18.2488	30.2544
82.64	4.50049	5.96777	8.15332	12.6853	18.2463	30.2488
82.74	4.48486	5.95337	8.14551	12.6711	18.2534	30.2527
82.84	4.50269	5.95874	8.15723	12.6899	18.261	30.2588
82.94	4.50513	5.96899	8.15796	12.6858	18.2649	30.2673
83.04	4.50342	5.96753	8.16406	12.6897	18.2534	30.2676
83.14	4.50586	5.96216	8.15015	12.6931	18.2634	30.2754
83.24	4.52075	5.97559	8.17529	12.7009	18.2625	30.2754
83.34	4.50977	5.96973	8.16187	12.6951	18.261	30.2751
83.44	4.50439	5.96973	8.15796	12.7007	18.2712	30.2751
83.54	4.51587	5.97217	8.17188	12.7053	18.2703	30.2869
83.64	4.51416	5.96655	8.16479	12.7061	18.2727	30.2869
83.74	4.51611	5.97998	8.16968	12.7007	18.2727	30.2869
83.84	4.5083	5.97681	8.17212	12.7053	18.2727	30.2869
83.94	4.50562	5.97681	8.16016	12.7053	18.2837	30.2861
84.04	4.52368	5.97998	8.17725	12.71	18.2891	30.304
84.14	4.52515	5.9978	8.18579	12.7288	18.2803	30.3015
84.24	4.52051	5.99146	8.19141	12.72	18.2954	30.3096
84.34	4.52515	5.99951	8.19165	12.7217	18.2891	30.304
84.44	4.52441	5.9978	8.18115	12.717	18.2852	30.3062
84.54	4.53223	5.99634	8.18115	12.7295	18.2993	30.3179
84.64	4.53223	6	8.19849	12.7356	18.2952	30.321
84.74	4.53613	6.00317	8.20068	12.7317	18.2998	30.3289
84.84	4.53076	5.99927	8.19922	12.7317	18.3083	30.3269
84.94	4.53662	6.00537	8.1958	12.7378	18.3032	30.3289
85.04	4.53687	6.01099	8.2085	12.7412	18.3	30.3289
85.14	4.53076	6.00391	8.19922	12.7434	18.3083	30.3271
85.24	4.52515	6.00464	8.20386	12.7363	18.3044	30.3254
85.34	4.52515	5.99927	8.2085	12.741	18.3218	30.3357
85.44	4.53931	6.01099	8.21069	12.7434	18.3196	30.3459
85.54	4.53149	6.00879	8.2085	12.7473	18.3093	30.3381
85.64	4.52979	6.00098	8.20386	12.7456	18.3186	30.3357
85.74	4.52759	6.00635	8.21094	12.7434	18.3186	30.3496
85.84	4.53687	6.01245	8.20825	12.7512	18.3208	30.3496
85.94	4.54395	6.01245	8.21533	12.7573	18.3235	30.3496
86.04	4.53223	6.00098	8.21558	12.748	18.3218	30.3591
86.14	4.53613	6.01831	8.21558	12.7583	18.324	30.3528
86.24	4.5354	6.01563	8.21558	12.7559	18.3264	30.3645
86.34	4.54712	6.01563	8.21387	12.7559	18.3284	30.3613
86.44	4.5376	6.02344	8.2207	12.7605	18.3379	30.3599
86.54	4.54395	6.02734	8.22705	12.7603	18.3379	30.3596
86.64	4.53052	6.01563	8.21387	12.7581	18.3357	30.3574
86.74	4.54468	6.01953	8.22803	12.7722	18.3396	30.3723
86.84	4.54858	6.01563	8.23169	12.7722	18.3381	30.376
86.94	4.54712	6.03198	8.23169	12.7747	18.3457	30.3721
87.04	4.55176	6.03052	8.24512	12.7705	18.3433	30.3767
87.14	4.53979	6.01855	8.23096	12.7681	18.3513	30.3848
87.24	4.55322	6.03662	8.23657	12.7793	18.3413	30.3745
87.34	4.55029	6.03052	8.24219	12.7708	18.3435	30.3884
87.44	4.55176	6.03198	8.23804	12.7798	18.3457	30.3909
87.54	4.55176	6.02271	8.23486	12.7737	18.3418	30.387
87.64	4.54761	6.02637	8.24268	12.7759	18.3479	30.3882
87.74	4.55151	6.03638	8.24268	12.7915	18.3623	30.4001
87.84	4.55176	6.03906	8.25464	12.7915	18.3621	30.4026
87.94	4.55957	6.04541	8.25464	12.7971	18.3535	30.387
88.04	4.55493	6.03979	8.24268	12.7947	18.3667	30.4045
88.14	4.55615	6.0437	8.24805	12.7961	18.3667	30.4063
88.24	4.56396	6.03833	8.24976	12.7986	18.3606	30.4031
88.34	4.56323	6.03027	8.24976	12.7971	18.3579	30.4146
88.44	4.56323	6.03955	8.24707	12.7944	18.3674	30.4124
88.54	4.55957	6.03979	8.25439	12.7961	18.3723	30.4141
88.64	4.55859	6.03906	8.26147	12.7971	18.3582	30.4099
88.74	4.55615	6.03052	8.24731	12.7947	18.3713	30.4238
88.84	4.57104	6.05127	8.27075	12.8037	18.3689	30.4248
88.94	4.55859	6.03882	8.25659	12.7983	18.3652	30.4265
89.04	4.5564	6.04224	8.25903	12.8135	18.3777	30.4226
89.14	4.56665	6.04224	8.26147	12.8096	18.3813	30.4341
89.24	4.56641	6.03979	8.25757	12.8108	18.3711	30.4263
89.34	4.56079	6.04346	8.26367	12.8179	18.3845	30.427
89.44	4.57104	6.03809	8.26196	12.814	18.3884	30.4412
89.54	4.57349	6.04663	8.26587	12.8179	18.3789	30.4302
89.64	4.5686	6.04272	8.27368	12.8225	18.3933	30.4341
89.74	4.57104	6.05444	8.27393	12.821	18.3799	30.4341
89.84	4.56323	6.04663	8.26587	12.8179	18.386	30.4341
89.94	4.57495	6.04663	8.26904	12.8179	18.4009	30.4353
90.04	4.57104	6.0481	8.27832	12.8257	18.3843	30.4363
90.14	4.55859	6.03735	8.26587	12.8093	18.386	30.4341
90.24	4.56787	6.04688	8.26611	12.8108	18.4023	30.4355
90.34	4.57104	6.04419	8.27393	12.8271	18.4048	30.4412
90.44	4.57495	6.05371	8.27759	12.8296	18.4033	30.4409
90.54	4.56323	6.04199	8.26587	12.8281	18.4006	30.4346
90.64	4.57104	6.03955	8.27368	12.8303	18.4009	30.4412
90.74	4.56982	6.05713	8.27246	12.8362	18.4087	30.4417
90.84	4.56421	6.04736	8.27148	12.8303	18.4126	30.4463
90.94	4.57593	6.05908	8.27393	12.842	18.4009	30.4409
91.04	4.56641	6.05371	8.26587	12.8328	18.4124	30.4502
91.14	4.56641	6.0498	8.28076	12.8406	18.4084	30.4531
91.24	4.5686	6.05566	8.27832	12.8381	18.4248	30.4695
91.34	4.58276	6.06274	8.29004	12.8418	18.4272	30.4719
91.44	4.58252	6.073	8.29248	12.8552	18.4116	30.4563
91.54	4.57422	6.05762	8.2771	12.8413	18.4294	30.4663
91.64	4.5874	6.06763	8.28223	12.8467	18.4194	30.4641
91.74	4.57495	6.05347	8.26587	12.8328	18.4365	30.4678
91.84	4.58276	6.06128	8.2854	12.8496	18.4351	30.4771
91.94	4.57397	6.06592	8.27686	12.8521	18.4429	30.4758
92.04	4.57886	6.06226	8.28174	12.8484	18.4412	30.4727
92.14	4.5874	6.07397	8.29004	12.8545	18.4468	30.489
92.24	4.58594	6.08252	8.29004	12.8608	18.4468	30.4795
92.34	4.57813	6.073	8.28784	12.8474	18.4373	30.4739
92.44	4.5686	6.06738	8.27832	12.8542	18.4434	30.4795
92.54	4.58252	6.073	8.29004	12.8599	18.4351	30.4841
92.64	4.57959	6.07788	8.28931	12.8569	18.4429	30.4841
92.74	4.5813	6.07397	8.28394	12.8528	18.4443	30.4841
92.84	4.58276	6.07764	8.29321	12.8613	18.4561	30.4919
92.94	4.58032	6.07373	8.29077	12.873	18.4543	30.5005
93.04	4.59766	6.08545	8.29712	12.8716	18.459	30.491
93.14	4.58569	6.07764	8.29541	12.8638	18.4629	30.4988
93.24	4.58716	6.08081	8.29761	12.8611	18.4602	30.501
93.34	4.58716	6.08984	8.30151	12.876	18.4778	30.5076
93.44	4.59766	6.09399	8.30029	12.8848	18.4778	30.5139
93.54	4.60229	6.0957	8.31274	12.8833	18.4636	30.4995
93.64	4.59033	6.09326	8.30469	12.8792	18.4778	30.5112
93.74	4.60059	6.09326	8.30469	12.8838	18.4587	30.5002
93.84	4.58716	6.08203	8.30469	12.8728	18.4636	30.4963
93.94	4.5835	6.07837	8.30493	12.8794	18.481	30.5137
94.04	4.58594	6.08789	8.30493	12.8794	18.4714	30.5127
94.14	4.58008	6.09009	8.31274	12.8816	18.4753	30.5151
94.24	4.59741	6.09009	8.3125	12.8877	18.4775	30.5017
94.34	4.58569	6.08789	8.30469	12.876	18.4829	30.5156
94.44	4.59497	6.09302	8.32422	12.8909	18.4822	30.5195
94.54	4.59033	6.09448	8.30933	12.8923	18.4941	30.5183
94.64	4.60205	6.10107	8.31201	12.8923	18.49	30.5259
94.74	4.60229	6.0957	8.31274	12.9058	18.4971	30.5273
94.84	4.60205	6.10498	8.32422	12.9033	18.5032	30.5242
94.94	4.59424	6.09473	8.31641	12.897	18.5017	30.5342
95.04	4.59033	6.09692	8.31714	12.8955	18.5002	30.5366
95.14	4.60205	6.10718	8.3313	12.9055	18.49	30.5227
95.24	4.59058	6.0979	8.32129	12.9001	18.4978	30.5305
95.34	4.58887	6.10034	8.31958	12.8987	18.4978	30.5344
95.44	4.58789	6.09473	8.32422	12.9033	18.4978	30.5342
95.54	4.58252	6.09692	8.3125	12.8955	18.5061	30.5388
95.64	4.59888	6.104	8.32104	12.9001	18.5093	30.5374
95.74	4.60059	6.1001	8.3313	12.9102	18.521	30.5449
95.84	4.60962	6.10938	8.32715	12.9116	18.5166	30.5466
95.94	4.60669	6.10889	8.33667	12.9104	18.5142	30.5583
96.04	4.60669	6.10474	8.34058	12.9197	18.521	30.5522
96.14	4.60449	6.11646	8.3313	12.915	18.5125	30.5466
96.24	4.59033	6.10474	8.32739	12.907	18.5171	30.5496
96.34	4.60278	6.10791	8.33667	12.9063	18.5303	30.5627
96.44	4.60986	6.12573	8.34033	12.9241	18.5281	30.5676
96.54	4.60889	6.12329	8.34741	12.9258	18.5242	30.561
96.64	4.61426	6.12085	8.34351	12.9177	18.5288	30.5659
96.74	4.60986	6.11963	8.33911	12.9272	18.5288	30.5754
96.84	4.61377	6.13135	8.35083	12.9336	18.5366	30.5691
96.94	4.61304	6.12427	8.34448	12.9272	18.5403	30.5823
97.04	4.62598	6.12573	8.35547	12.9382	18.5449	30.5728
97.14	4.61816	6.13135	8.35522	12.9263	18.5435	30.5791
97.24	4.6167	6.1272	8.35132	12.9341	18.553	30.5854
97.34	4.62476	6.12891	8.36328	12.9343	18.5569	30.5852
97.44	4.62695	6.12891	8.36328	12.9343	18.5554	30.5837
97.54	4.62134	6.12744	8.3562	12.9343	18.5552	30.6001
97.64	4.63159	6.13599	8.37012	12.9343	18.5527	30.604
97.74	4.62915	6.13574	8.37012	12.9492	18.5566	30.6013
97.84	4.63062	6.14355	8.36768	12.9504	18.5554	30.6072
97.94	4.63647	6.14063	8.36792	12.939	18.5601	30.6157
98.04	4.63623	6.14307	8.37036	12.9453	18.5598	30.6116
98.14	4.63379	6.14819	8.36792	12.9375	18.5598	30.6116
98.24	4.62598	6.14746	8.37158	12.9436	18.5645	30.6116
98.34	4.6377	6.14746	8.37012	12.9458	18.5747	30.6194
98.44	4.64331	6.14355	8.37012	12.9536	18.5715	30.6233
98.54	4.64063	6.15063	8.37939	12.9607	18.5596	30.6099
98.64	4.64063	6.15039	8.37329	12.9487	18.5708	30.6201
98.74	4.64014	6.14429	8.37866	12.9465	18.5762	30.6326
98.84	4.64551	6.1521	8.38403	12.9622	18.5762	30.6348
98.94	4.64551	6.15063	8.37476	12.949	18.5786	30.6333
99.04	4.64795	6.15527	8.38501	12.9607	18.5825	30.6355
99.14	4.6438	6.16309	8.38257	12.9583	18.5837	30.6543
99.24	4.66162	6.16699	8.38403	12.9622	18.5762	30.6426
99.34	4.65259	6.15527	8.38647	12.9529	18.5864	30.6426
99.44	4.65112	6.16309	8.3811	12.9536	18.5825	30.6543
99.54	4.66504	6.16699	8.38721	12.9653	18.5964	30.6501
99.64	4.66479	6.16455	8.39893	12.9614	18.5911	30.6548
99.74	4.65698	6.17017	8.38257	12.9583	18.5979	30.6572
99.84	4.65942	6.16992	8.39404	12.9724	18.594	30.6572
99.94	4.66724	6.17139	8.40112	12.9651	18.6079	30.6665
100.04	4.66479	6.18311	8.39868	12.9744	18.6025	30.6548
100.14	4.65723	6.17017	8.39893	12.9724	18.6025	30.6736
100.24	4.67456	6.17871	8.40527	12.9841	18.6104	30.6736
100.34	4.66797	6.17456	8.39746	12.9778	18.6089	30.6838
100.44	4.67188	6.18481	8.40894	12.9917	18.5955	30.6663
100.54	4.65698	6.17603	8.3916	12.9768	18.6033	30.6741
100.64	4.66333	6.18628	8.39404	12.9775	18.6138	30.6885
100.74	4.67676	6.19116	8.40918	12.9966	18.6135	30.6814
100.84	4.66724	6.18164	8.39746	12.9841	18.6111	30.689
100.94	4.67261	6.18555	8.39502	12.9761	18.615	30.6929
101.04	4.67651	6.19092	8.4104	12.9822	18.6221	30.7092
101.14	4.67896	6.20264	8.4104	12.9885	18.6282	30.7075
101.24	4.68677	6.20435	8.42383	12.9963	18.6228	30.7039
101.34	4.67261	6.19409	8.41382	12.988	18.6267	30.71
101.44	4.68359	6.19556	8.41528	13.001	18.6331	30.7124
101.54	4.69141	6.20581	8.42554	13.001	18.6416	30.7239
101.64	4.69141	6.20508	8.42798	13.0066	18.6296	30.7153
101.74	4.69141	6.20117	8.41357	13.0042	18.6375	30.7231
101.84	4.6897	6.2019	8.42139	12.9995	18.6343	30.7214
101.94	4.68872	6.20264	8.41821	12.9937	18.6328	30.7236
102.04	4.69116	6.18945	8.40894	12.9993	18.6377	30.7231
102.14	4.69458	6.2019	8.42627	13.0002	18.6494	30.7395
102.24	4.69922	6.2019	8.42847	13.0042	18.646	30.7402
102.34	4.70752	6.21045	8.43311	13.0127	18.6445	30.7463
102.44	4.70361	6.21045	8.43311	13.0071	18.6538	30.7439
102.54	4.70288	6.20581	8.42603	13.0085	18.6563	30.7463
102.64	4.71313	6.21606	8.44482	13.011	18.6604	30.7517
102.74	4.70703	6.21362	8.45264	13.0166	18.6655	30.7627
102.84	4.7124	6.22681	8.45654	13.0276	18.6538	30.7627
102.94	4.71802	6.2207	8.44482	13.0276	18.6687	30.7588
103.04	4.71411	6.22852	8.44482	13.0188	18.6726	30.7659
103.14	4.71069	6.22998	8.448	13.0203	18.6609	30.7671
103.24	4.70044	6.22192	8.44922	13.0273	18.6726	30.7673
103.34	4.71484	6.23242	8.44946	13.0276	18.6687	30.7776
103.44	4.71338	6.23706	8.4519	13.0237	18.6641	30.7659
103.54	4.70386	6.22534	8.448	13.0234	18.6804	30.782
103.64	4.72266	6.22852	8.45264	13.0305	18.6765	30.7781
103.74	4.71387	6.23608	8.46045	13.0383	18.6848	30.7866
103.84	4.71069	6.23438	8.46118	13.0327	18.6755	30.7773
103.94	4.71533	6.2251	8.44775	13.0273	18.688	30.7781
104.04	4.71387	6.23291	8.46021	13.0337	18.6882	30.7898
104.14	4.72339	6.24023	8.46436	13.0313	18.6882	30.7795
104.24	4.71924	6.2417	8.4541	13.0327	18.688	30.7852
104.34	4.71387	6.23779	8.46436	13.0352	18.688	30.7966
104.44	4.72559	6.2439	8.46289	13.0352	18.6926	30.7825
104.54	4.71533	6.22827	8.45239	13.0383	18.6995	30.8013
104.64	4.72241	6.24463	8.46875	13.0469	18.6997	30.8015
104.74	4.73047	6.24243	8.46899	13.0398	18.6951	30.7969
104.84	4.71411	6.23242	8.45508	13.0352	18.6926	30.7944
104.94	4.72339	6.23999	8.46899	13.0352	18.7029	30.8091
105.04	4.73022	6.24536	8.47217	13.0461	18.7158	30.813
105.14	4.73022	6.25317	8.48047	13.0562	18.6995	30.813
105.24	4.72559	6.24854	8.46655	13.0537	18.7075	30.8091
105.34	4.72339	6.24487	8.47217	13.0461	18.71	30.8193
105.44	4.73755	6.25513	8.47217	13.0579	18.6958	30.8091
105.54	4.72314	6.24463	8.47217	13.0476	18.7051	30.8066
105.64	4.73022	6.24219	8.47339	13.0476	18.7112	30.8206
105.74	4.74194	6.25952	8.479	13.0591	18.7144	30.8135
105.84	4.73486	6.25635	8.48364	13.0615	18.719	30.8308
105.94	4.74902	6.25635	8.479	13.0615	18.7268	30.8284
106.04	4.74512	6.26392	8.47656	13.0669	18.7166	30.8296
106.14	4.73462	6.2522	8.48364	13.0591	18.7229	30.8354
106.24	4.74658	6.26416	8.48364	13.0618	18.7292	30.8433
106.34	4.74512	6.26416	8.48364	13.0693	18.7268	30.8447
106.44	4.74512	6.26416	8.49536	13.0669	18.7236	30.8401
106.54	4.74976	6.25952	8.48364	13.0662	18.7354	30.8477
106.64	4.74731	6.27344	8.49146	13.074	18.729	30.8516
106.74	4.74902	6.271	8.49536	13.0693	18.7429	30.8633
106.84	4.75659	6.28027	8.49512	13.0786	18.7502	30.8643
106.94	4.76221	6.29077	8.50635	13.0859	18.7371	30.8665
107.04	4.75684	6.27905	8.49854	13.0725	18.7432	30.8594
107.14	4.75122	6.28516	8.49292	13.0833	18.7432	30.8594
107.24	4.76147	6.28735	8.50317	13.0857	18.7336	30.8594
107.34	4.7522	6.27417	8.49146	13.074	18.7429	30.8743
107.44	4.74951	6.28345	8.49536	13.0857	18.7461	30.8716
107.54	4.75879	6.28101	8.50317	13.0818	18.7461	30.864
107.64	4.74976	6.27588	8.49146	13.074	18.75	30.8782
107.74	4.7522	6.28589	8.49536	13.0857	18.7461	30.8818
107.84	4.75757	6.28418	8.50317	13.085	18.761	30.8911
107.94	4.76221	6.30298	8.50635	13.1013	18.7546	30.895
108.04	4.76587	6.29517	8.50781	13.0903	18.75	30.8896
108.14	4.76367	6.29053	8.50708	13.0974	18.7578	30.8933
108.24	4.75732	6.2959	8.50293	13.0933	18.7649	30.9028
108.34	4.77393	6.30688	8.51807	13.1084	18.7671	30.9146
108.44	4.77783	6.30444	8.51563	13.1145	18.7649	30.9021
108.54	4.77173	6.30225	8.51099	13.1006	18.7607	30.9021
108.64	4.76904	6.29834	8.51489	13.1084	18.77	30.9131
108.74	4.76978	6.30762	8.52588	13.1128	18.7725	30.9128
108.84	4.77222	6.31006	8.51392	13.1011	18.7703	30.9106
108.94	4.77393	6.30322	8.51563	13.113	18.7773	30.9177
109.04	4.78882	6.30298	8.51563	13.1106	18.7888	30.9294
109.14	4.78882	6.31934	8.52734	13.1201	18.7771	30.9128
109.24	4.78101	6.31006	8.52197	13.1199	18.7856	30.9189
109.34	4.78955	6.31152	8.51489	13.126	18.7842	30.9214
109.44	4.78076	6.31006	8.52246	13.1245	18.7935	30.9246
109.54	4.77612	6.30762	8.5271	13.1199	18.7959	30.9292
109.64	4.78784	6.32178	8.53345	13.1199	18.7966	30.9373
109.74	4.78174	6.3147	8.52588	13.1255	18.8005	30.9377
109.84	4.78955	6.31616	8.53198	13.1331	18.7935	30.9246
109.94	4.77612	6.32178	8.53418	13.1316	18.8037	30.937
110.04	4.78857	6.31787	8.53271	13.1323	18.7996	30.9407
110.14	4.78857	6.31934	8.54199	13.144	18.8096	30.9539
110.24	4.78931	6.33472	8.54346	13.1409	18.8201	30.9526
110.34	4.79736	6.32959	8.54614	13.1409	18.8083	30.9512
110.44	4.78809	6.32178	8.5415	13.1465	18.8123	30.9487
110.54	4.78809	6.33105	8.53882	13.144	18.8186	30.9565
110.64	4.79565	6.32959	8.55225	13.144	18.8159	30.9602
110.74	4.79321	6.3374	8.55371	13.1589	18.8174	30.9602
110.84	4.80029	6.33081	8.54346	13.1487	18.8201	30.9612
110.94	4.80054	6.32715	8.55396	13.1519	18.8186	30.9675
111.04	4.7959	6.34131	8.5564	13.1558	18.8208	30.9636
111.14	4.79346	6.32959	8.54199	13.144	18.8276	30.9641
111.24	4.80054	6.34668	8.55444	13.155	18.8276	30.9773
111.34	4.80908	6.35059	8.55835	13.165	18.823	30.9673
111.44	4.79102	6.32935	8.54126	13.1628	18.8206	30.9763
111.54	4.79321	6.33862	8.54907	13.1555	18.8274	30.9827
111.64	4.80811	6.34888	8.56616	13.1548	18.8289	30.9841
111.74	4.79712	6.35034	8.55835	13.1531	18.8347	30.9797
111.84	4.7959	6.35059	8.56885	13.1675	18.8425	30.9795
111.94	4.80835	6.35303	8.5686	13.1636	18.832	30.9827
112.04	4.80054	6.34912	8.55444	13.1633	18.8423	30.9873
112.14	4.80029	6.35352	8.57324	13.1704	18.8501	30.9951
112.24	4.80811	6.36133	8.57324	13.1782	18.8352	30.9873
112.34	4.80347	6.35352	8.57324	13.1641	18.8484	30.999
112.44	4.80493	6.35352	8.57324	13.1797	18.8501	30.9949
112.54	4.80811	6.36133	8.58105	13.1782	18.8665	31.0115
112.64	4.81274	6.36621	8.58105	13.1829	18.8547	31.0061
112.74	4.81055	6.3606	8.57324	13.1829	18.8586	31.0107
112.84	4.81982	6.36841	8.58813	13.1868	18.8665	31.0066
112.94	4.81274	6.37061	8.58569	13.1829	18.8594	31.0112
113.04	4.80493	6.36523	8.57324	13.1829	18.8657	31.0176
113.14	4.81909	6.37231	8.58496	13.1829	18.8662	31.0229
113.24	4.80811	6.36597	8.58105	13.1904	18.8591	31.0183
113.34	4.81104	6.36499	8.58081	13.1858	18.8779	31.0183
113.44	4.82104	6.37671	8.59253	13.199	18.8782	31.0261
113.54	4.83154	6.37305	8.59741	13.1953	18.8782	31.03
113.64	4.8269	6.38477	8.59985	13.2095	18.8779	31.03
113.74	4.81519	6.37695	8.59277	13.1992	18.885	31.0332
113.84	4.83618	6.37695	8.59985	13.2178	18.8826	31.0422
113.94	4.83594	6.38452	8.60889	13.2139	18.8826	31.0344
114.04	4.83594	6.37744	8.59717	13.2139	18.885	31.0486
114.14	4.83838	6.38379	8.61133	13.2178	18.8811	31.041
114.24	4.83472	6.38477	8.60059	13.2141	18.8975	31.0527
114.34	4.84644	6.3833	8.60449	13.2212	18.8857	31.0503
114.44	4.82764	6.37769	8.60767	13.2053	18.8936	31.054
114.54	4.8291	6.3894	8.61694	13.2192	18.8975	31.0525
114.64	4.84326	6.38452	8.61206	13.2256	18.8857	31.0571
114.74	4.83008	6.38452	8.60425	13.2241	18.8938	31.0649
114.84	4.83545	6.38477	8.6123	13.218	18.9021	31.0703
114.94	4.84082	6.38477	8.60913	13.2234	18.8943	31.061
115.04	4.83154	6.38477	8.60767	13.2256	18.9045	31.0759
115.14	4.84644	6.39331	8.62402	13.2302	18.9124	31.0837
115.24	4.84644	6.39185	8.62402	13.2405	18.8972	31.0696
115.34	4.84399	6.38794	8.6123	13.2288	18.9104	31.0771
115.44	4.84766	6.38916	8.62402	13.2302	18.9043	31.0789
115.54	4.85083	6.38452	8.61914	13.2334	18.9121	31.0881
115.64	4.85083	6.39624	8.62842	13.2405	18.9053	31.0813
115.74	4.84644	6.38477	8.62402	13.2454	18.9067	31.0928
115.84	4.85571	6.39258	8.62866	13.238	18.9209	31.103
115.94	4.85571	6.40112	8.62866	13.2498	18.9077	31.0952
116.04	4.85034	6.40356	8.6311	13.2405	18.9128	31.0889
116.14	4.85425	6.39233	8.6272	13.2366	18.9167	31.103
116.24	4.854	6.40259	8.63867	13.248	18.917	31.1006
116.34	4.85181	6.39722	8.62476	13.2341	18.9185	31.1116
116.44	4.85962	6.40112	8.64038	13.2419	18.9285	31.1077
116.54	4.85425	6.4043	8.63892	13.2483	18.9238	31.1123
116.64	4.85889	6.39697	8.64355	13.2412	18.9355	31.1145
116.74	4.85889	6.40649	8.63892	13.2529	18.9292	31.1184
116.84	4.85864	6.41187	8.64429	13.2529	18.9512	31.127
116.94	4.87354	6.41187	8.65503	13.2644	18.9409	31.1284
117.04	4.86328	6.40552	8.65503	13.2542	18.9363	31.1389
117.14	4.86353	6.41602	8.65137	13.2678	18.948	31.1374
117.24	4.87769	6.41455	8.66309	13.2717	18.9363	31.127
117.34	4.86353	6.41187	8.65137	13.2576	18.948	31.1401
117.44	4.87891	6.41724	8.65527	13.2732	18.9526	31.1504
117.54	4.87744	6.41577	8.66284	13.2795	18.9551	31.137
117.64	4.87744	6.41113	8.66284	13.2676	18.9478	31.1509
117.74	4.875	6.41113	8.66284	13.269	18.9587	31.158
117.84	4.88989	6.41187	8.66284	13.2839	18.9509	31.1533
117.94	4.88062	6.41187	8.66284	13.2676	18.9604	31.1511
118.04	4.87817	6.41211	8.66626	13.2756	18.9604	31.166
118.14	4.88745	6.41675	8.67554	13.2817	18.9719	31.1699
118.24	4.88989	6.41895	8.67456	13.2959	18.9697	31.165
118.34	4.88525	6.41187	8.67456	13.2793	18.9634	31.1587
118.44	4.88135	6.41968	8.67383	13.2832	18.9719	31.1775
118.54	4.89453	6.42041	8.68701	13.2886	18.9722	31.1658
118.64	4.88306	6.42065	8.6748	13.2888	18.9778	31.1775
118.74	4.8894	6.42627	8.6748	13.2913	18.9751	31.1775
118.84	4.89331	6.42383	8.68237	13.2966	18.9797	31.1775
118.94	4.88599	6.42358	8.67383	13.3035	18.9954	31.1775
119.04	4.89917	6.42505	8.68701	13.3035	18.99	31.1821
119.14	4.90161	6.4353	8.68701	13.3035	18.9822	31.1843
119.24	4.89697	6.42603	8.68945	13.3035	18.9915	31.1921
119.34	4.89453	6.42358	8.68555	13.3035	18.9866	31.1851
119.44	4.90479	6.42822	8.68213	13.3035	18.9944	31.1943
119.54	4.90625	6.42798	8.69165	13.3035	19.0063	31.2009
119.64	4.90161	6.43066	8.69409	13.3152	18.9985	31.196
119.74	4.90161	6.43066	8.69409	13.3035	18.9944	31.1897
119.84	4.89771	6.42432	8.69409	13.3113	18.9944	31.1953
119.94	4.88843	6.42676	8.68091	13.302	19.0061	31.1968
120.04	4.88599	6.42822	8.69019	13.3042	19.01	31.1982
120.14	4.89917	6.43213	8.69556	13.3198	19.0063	31.2085
120.24	4.90186	6.43872	8.70605	13.3152	19.0063	31.207
120.34	4.89697	6.43872	8.68945	13.3152	19.0061	31.2092
120.44	4.89307	6.4353	8.69727	13.3152	19.0063	31.2053
120.54	4.89453	6.42505	8.68701	13.3152	19.0061	31.2083
120.64	4.89453	6.43848	8.68701	13.3113	19.0225	31.2231
120.74	4.90161	6.44312	8.70581	13.3196	19.0132	31.2161
120.84	4.90161	6.43066	8.68945	13.3252	19.0173	31.2241
120.94	4.89795	6.43628	8.6936	13.3191	19.0225	31.2295
121.04	4.90967	6.43994	8.70654	13.3276	19.0225	31.22
121.14	4.90161	6.43066	8.69873	13.3198	19.0249	31.2302
121.24	4.90161	6.44238	8.70117	13.334	19.0303	31.2278
121.34	4.90942	6.43604	8.70654	13.3262	19.0295	31.2324
121.44	4.90479	6.44312	8.70581	13.3306	19.0444	31.2393
121.54	4.92114	6.4502	8.7207	13.3391	19.0339	31.2393
121.64	4.90625	6.4397	8.71045	13.343	19.0371	31.2307
121.74	4.90161	6.44287	8.70874	13.333	19.0254	31.2283
121.84	4.90137	6.44287	8.69458	13.3306	19.0405	31.2395
121.94	4.90479	6.44702	8.70581	13.3394	19.0405	31.2458
122.04	4.9126	6.44312	8.71216	13.3376	19.0498	31.2432
122.14	4.91406	6.45801	8.72144	13.3469	19.042	31.2446
122.24	4.90625	6.44775	8.71118	13.3391	19.0449	31.2471
122.34	4.9126	6.44287	8.71338	13.3455	19.052	31.262
122.44	4.91699	6.45923	8.72827	13.354	19.0566	31.25
122.54	4.90918	6.44995	8.71655	13.354	19.0566	31.2593
122.64	4.9209	6.44995	8.72583	13.3538	19.0569	31.2666
122.74	4.90942	6.45483	8.72534	13.3572	19.0647	31.2681
122.84	4.91089	6.45239	8.72998	13.3586	19.0684	31.2705
122.94	4.92822	6.46655	8.72852	13.3704	19.0566	31.269
123.04	4.9165	6.45728	8.72827	13.3611	19.0645	31.2742
123.14	4.91699	6.45068	8.72583	13.365	19.073	31.2827
123.24	4.93335	6.46704	8.73291	13.3733	19.0769	31.2781
123.34	4.92944	6.46313	8.72974	13.363	19.0718	31.2861
123.44	4.92432	6.45483	8.72607	13.3735	19.0718	31.2813
123.54	4.92432	6.45337	8.7207	13.3689	19.0645	31.2788
123.64	4.92114	6.45093	8.72852	13.365	19.0723	31.2813
123.74	4.92896	6.45093	8.72437	13.3696	19.0676	31.2773
123.84	4.91724	6.45093	8.71411	13.3696	19.084	31.2866
123.94	4.91724	6.45068	8.73608	13.3694	19.0691	31.2905
124.04	4.91724	6.45215	8.72583	13.3708	19.073	31.2896
124.14	4.9209	6.46167	8.73291	13.3804	19.0876	31.3005
124.24	4.92163	6.4624	8.74536	13.3928	19.0862	31.2935
124.34	4.92407	6.45776	8.73999	13.3765	19.084	31.3054
124.44	4.92432	6.45947	8.73633	13.386	19.0854	31.302
124.54	4.91406	6.46313	8.73755	13.3821	19.0879	31.302
124.64	4.92188	6.45776	8.73755	13.385	19.0996	31.3123
124.74	4.94043	6.47412	8.75635	13.3882	19.0864	31.3123
124.84	4.93262	6.4624	8.74316	13.3928	19.0916	31.3176
124.94	4.92871	6.4624	8.74854	13.3928	19.0884	31.3169
125.04	4.93188	6.46558	8.74146	13.3811	19.0923	31.3135
125.14	4.93335	6.4668	8.74927	13.3928	19.0879	31.3123
125.24	4.92114	6.45923	8.74463	13.3811	19.0994	31.3286
125.34	4.93286	6.47339	8.74463	13.385	19.0986	31.3247
125.44	4.92896	6.46704	8.75562	13.3928	19.1033	31.3167
125.54	4.92871	6.47412	8.75244	13.3975	19.1086	31.3284
125.64	4.93262	6.47803	8.74927	13.4045	19.1143	31.3315
125.74	4.93579	6.4812	8.75244	13.3997	19.0955	31.3174
125.84	4.92163	6.46216	8.74438	13.3972	19.1101	31.3359
125.94	4.94043	6.47852	8.75928	13.4043	19.1118	31.333
126.04	4.93286	6.47803	8.75244	13.4077	19.1221	31.3315
126.14	4.92749	6.47266	8.76025	13.4155	19.1118	31.3362
126.24	4.93335	6.47876	8.75708	13.4092	19.1104	31.3284
126.34	4.92554	6.47876	8.74463	13.3975	19.115	31.3408
126.44	4.94043	6.48193	8.75537	13.4124	19.1196	31.3477
126.54	4.94043	6.48584	8.76465	13.4194	19.1218	31.3462
126.64	4.94043	6.48413	8.76709	13.4192	19.1311	31.3438
126.74	4.9436	6.48633	8.76392	13.4167	19.1311	31.3452
126.84	4.94507	6.49023	8.76147	13.4285	19.1218	31.3477
126.94	4.94043	6.4856	8.76392	13.4153	19.1384	31.3479
127.04	4.94531	6.48901	8.77905	13.4365	19.1267	31.3462
127.14	4.9397	6.48901	8.77124	13.4312	19.1343	31.3484
127.24	4.9436	6.48657	8.76001	13.4316	19.1414	31.3672
127.34	4.95996	6.50513	8.77637	13.4363	19.1428	31.3555
127.44	4.94507	6.49487	8.77563	13.4402	19.1382	31.3552
127.54	4.93726	6.49731	8.76392	13.4309	19.1343	31.3552
127.64	4.94751	6.49585	8.76709	13.4387	19.146	31.3669
127.74	4.94043	6.49341	8.76465	13.4363	19.1414	31.3601
127.84	4.94385	6.48193	8.76416	13.4434	19.1436	31.3718
127.94	4.94507	6.49121	8.7688	13.4434	19.1577	31.3743
128.04	4.94507	6.49731	8.77881	13.4434	19.1453	31.374
128.14	4.94751	6.49585	8.77173	13.4434	19.1414	31.3599
128.24	4.92871	6.48169	8.76392	13.4434	19.146	31.3818
128.34	4.9436	6.49805	8.77563	13.4434	19.1584	31.3826
128.44	4.94824	6.50513	8.7749	13.4463	19.1489	31.3699
128.54	4.94824	6.48877	8.77954	13.4509	19.1582	31.3792
128.64	4.94824	6.49658	8.78345	13.4509	19.1543	31.3831
128.74	4.94482	6.48999	8.78003	13.4478	19.1606	31.3745
128.84	4.94482	6.4978	8.77612	13.4463	19.165	31.3816
128.94	4.9519	6.50488	8.79492	13.4626	19.1621	31.3911
129.04	4.95532	6.50513	8.79053	13.4558	19.1724	31.3896
129.14	4.96313	6.49976	8.78662	13.4658	19.1685	31.3823
129.24	4.94824	6.4895	8.77954	13.4556	19.1731	31.3972
129.34	4.95288	6.50586	8.7959	13.4744	19.1746	31.3955
129.44	4.95679	6.50952	8.78784	13.4626	19.1809	31.3979
129.54	4.96704	6.50952	8.79028	13.4744	19.1841	31.4009
129.64	4.96313	6.51196	8.7981	13.4744	19.1685	31.3906
129.74	4.948	6.50806	8.7793	13.4626	19.1848	31.4128
129.84	4.9646	6.51294	8.7959	13.4744	19.1863	31.4102
129.94	4.9646	6.52222	8.7998	13.4822	19.1887	31.4102
130.04	4.95215	6.51685	8.79517	13.4705	19.1887	31.4172
130.14	4.96704	6.51685	8.79834	13.4868	19.187	31.4126
130.24	4.96704	6.51538	8.7981	13.4814	19.1853	31.4087
130.34	4.96069	6.52051	8.79565	13.4854	19.1846	31.418
130.44	4.96777	6.51733	8.80273	13.478	19.1917	31.4204
130.54	4.9668	6.51978	8.80127	13.4897	19.1895	31.4133
130.64	4.95142	6.51294	8.79907	13.4822	19.1895	31.4211
130.74	4.96069	6.50903	8.79663	13.4868	19.1997	31.4297
130.84	4.9646	6.52539	8.80298	13.4868	19.2043	31.425
130.94	4.97168	6.52466	8.80273	13.4971	19.208	31.4365
131.04	4.97632	6.53613	8.81909	13.5056	19.2041	31.4443
131.14	4.98633	6.53223	8.81763	13.5085	19.2041	31.4397
131.24	4.9707	6.53223	8.80591	13.4944	19.208	31.4412
131.34	4.98389	6.53613	8.81909	13.51	19.208	31.4365
131.44	4.97144	6.52441	8.80273	13.5007	19.2041	31.4326
131.54	4.97925	6.52759	8.81055	13.5085	19.2041	31.4324
131.64	4.96753	6.51733	8.80273	13.4897	19.2039	31.4395
131.74	4.97461	6.53589	8.81421	13.5061	19.2073	31.4443
131.84	4.97949	6.52759	8.80591	13.5017	19.2134	31.4373
131.94	4.98389	6.53687	8.81982	13.5061	19.2275	31.449
132.04	4.98389	6.54077	8.83398	13.5085	19.2112	31.4436
132.14	4.98633	6.53149	8.82153	13.5132	19.2166	31.4475
132.24	4.98242	6.53223	8.81372	13.521	19.2156	31.4402
132.34	4.97534	6.52368	8.81836	13.5093	19.2305	31.4565
132.44	4.9917	6.53979	8.823	13.5242	19.2319	31.4722
132.54	4.99951	6.54517	8.83838	13.5293	19.2275	31.4631
132.64	4.99512	6.54785	8.83081	13.5295	19.2354	31.4707
132.74	4.99097	6.54248	8.84106	13.5281	19.2307	31.4565
132.84	4.99414	6.54004	8.82227	13.521	19.2353	31.4753
132.94	4.99878	6.54858	8.83716	13.5374	19.2305	31.4629
133.04	4.99414	6.53931	8.82935	13.5352	19.2358	31.4683
133.14	4.9917	6.54004	8.83008	13.5405	19.2319	31.4604
133.24	4.99561	6.52905	8.81958	13.5256	19.2273	31.4707
133.34	4.99414	6.54077	8.83691	13.5325	19.2305	31.4636
133.44	4.99878	6.53589	8.83374	13.5254	19.2314	31.4714
133.54	4.99878	6.54712	8.83008	13.5437	19.2432	31.4753
133.64	5.0105	6.54712	8.8418	13.5476	19.2351	31.4753
133.74	4.99878	6.53223	8.8418	13.5405	19.2468	31.4871
133.84	5.00732	6.54541	8.84253	13.5537	19.2429	31.4832
133.94	5.00586	6.54395	8.83398	13.5522	19.2476	31.4751
134.04	4.99878	6.54712	8.83716	13.5442	19.2422	31.4751
134.14	4.99878	6.53931	8.83691	13.5427	19.2466	31.4868
134.24	5.0105	6.5437	8.83447	13.552	19.2473	31.4861
134.34	5.00659	6.55615	8.84155	13.5527	19.2544	31.4873
134.44	4.99878	6.54834	8.83838	13.5566	19.2664	31.4915
134.54	5.0105	6.54785	8.83716	13.5562	19.2539	31.4939
134.64	4.99878	6.54639	8.8418	13.5515	19.2476	31.4829
134.74	5.00659	6.54004	8.84961	13.5437	19.2661	31.4978
134.84	5.0105	6.5564	8.85327	13.5598	19.2661	31.4993
134.94	5.01196	6.55249	8.84302	13.5535	19.2661	31.4993
135.04	5.0105	6.55542	8.85327	13.5637	19.2544	31.5063
135.14	5.01367	6.54688	8.84863	13.5566	19.2661	31.5015
135.24	5.01758	6.55859	8.86035	13.5708	19.2661	31.499
135.34	5.01025	6.54443	8.84155	13.5552	19.2693	31.5061
135.44	5.01489	6.56323	8.85791	13.5715	19.2739	31.5095
135.54	5.03003	6.56812	8.8728	13.5715	19.2739	31.5095
135.64	5.02856	6.57056	8.85962	13.5715	19.2856	31.5139
135.74	5.03003	6.56641	8.86108	13.5833	19.2786	31.5115
135.84	5.02295	6.57593	8.86572	13.5762	19.2771	31.5139
135.94	5.02295	6.56323	8.86572	13.5669	19.2817	31.5171
136.04	5.01831	6.55615	8.86108	13.5715	19.2856	31.521
136.14	5.02515	6.57031	8.86035	13.5833	19.2737	31.5068
136.24	5.01343	6.56323	8.8562	13.5715	19.2861	31.5215
136.34	5.02588	6.56641	8.86157	13.5793	19.3018	31.5332
136.44	5.02734	6.56787	8.8772	13.5833	19.2927	31.5256
136.54	5.02222	6.56812	8.86499	13.5833	19.2888	31.5217
136.64	5.02856	6.57837	8.87134	13.5793	19.2981	31.5334
136.74	5.02588	6.57495	8.8689	13.5911	19.2935	31.5332
136.84	5.03052	6.56641	8.87354	13.5833	19.3018	31.5347
136.94	5.03833	6.57959	8.88135	13.5964	19.2925	31.5371
137.04	5.03369	6.56787	8.87646	13.5872	19.3003	31.5356
137.14	5.02979	6.57813	8.87256	13.5935	19.2861	31.5332
137.24	5.02979	6.56787	8.87256	13.5793	19.3049	31.5378
137.34	5.03687	6.58643	8.87573	13.5908	19.3052	31.5527
137.44	5.03784	6.58594	8.88843	13.5957	19.3037	31.5435
137.54	5.03296	6.58594	8.87598	13.5981	19.3127	31.5527
137.64	5.04224	6.58276	8.88525	13.606	19.3025	31.5496
137.74	5.03442	6.57959	8.87744	13.5957	19.3127	31.5457
137.84	5.02979	6.57568	8.87598	13.5986	19.3213	31.5645
137.94	5.04468	6.59448	8.89209	13.6072	19.3237	31.552
138.04	5.03296	6.58521	8.89209	13.6096	19.3201	31.5598
138.14	5.04248	6.59473	8.89233	13.6028	19.3293	31.562
138.24	5.04639	6.5874	8.89697	13.6106	19.3167	31.5645
138.34	5.04175	6.5874	8.8877	13.6028	19.333	31.5762
138.44	5.04492	6.59448	8.90405	13.6145	19.3394	31.5793
138.54	5.05713	6.60547	8.90479	13.6152	19.3394	31.5791
138.64	5.04932	6.59766	8.90723	13.6177	19.3323	31.5767
138.74	5.06104	6.60229	8.90381	13.6223	19.3367	31.5837
138.84	5.04932	6.59521	8.90845	13.6138	19.3437	31.5916
138.94	5.05713	6.60229	8.91162	13.6262	19.3555	31.5928
139.04	5.05859	6.61084	8.92334	13.6267	19.3438	31.5906
139.14	5.06421	6.59766	8.92334	13.6267	19.3516	31.5984
139.24	5.06421	6.60522	8.91479	13.6252	19.3438	31.5913
139.34	5.05688	6.60278	8.90454	13.6228	19.3555	31.5959
139.44	5.06152	6.61377	8.9231	13.6338	19.3589	31.6033
139.54	5.06885	6.61401	8.92651	13.634	19.3604	31.6072
139.64	5.06958	6.61548	8.92798	13.6458	19.3555	31.6072
139.74	5.06812	6.61792	8.92334	13.634	19.3555	31.6101
[truncated: 2,203 more rows]

## Sheet: Figure 3G
time s	40 nM	313 nM	625 nM	1250 nM	2500 nM	5000 nM
-60.06	-0.0778809	-0.361578	-0.478516	-0.45313	-0.384527	-0.586675
-59.96	-0.0913086	-0.306887	-0.443359	-0.433596	-0.435061	-0.5647
-59.86	-0.118408	-0.265384	-0.395508	-0.423343	-0.598392	-0.545169
-59.76	-0.149658	-0.226321	-0.35498	-0.390628	-0.667972	-0.528812
-59.66	-0.171631	-0.210694	-0.315918	-0.381348	-0.739747	-0.524171
-59.56	-0.288086	-0.162358	-0.306641	-0.335942	-0.682133	-0.500737
-59.46	-0.250732	-0.154541	-0.251953	-0.377442	-0.553955	-0.528077
-59.36	-0.240479	-0.158936	-0.237793	-0.393555	-0.458496	-0.5271
-59.26	-0.200439	-0.176512	-0.22998	-0.428221	-0.411131	-0.545164
-59.16	-0.156982	-0.223874	-0.276855	-0.443601	-0.406247	-0.552976
-59.06	-0.142578	-0.280024	-0.333008	-0.438959	-0.42187	-0.568598
-58.96	-0.134033	-0.288817	-0.399414	-0.431151	-0.435057	-0.581786
-58.86	-0.132568	-0.281005	-0.404053	-0.415527	-0.423339	-0.570068
-58.76	-0.118408	-0.290282	-0.387695	-0.420409	-0.428221	-0.568602
-58.66	-0.126221	-0.289795	-0.38623	-0.430664	-0.4375	-0.559326
-58.56	-0.137451	-0.291747	-0.38623	-0.432616	-0.437499	-0.556884
-58.46	-0.130127	-0.295166	-0.38623	-0.412598	-0.432129	-0.535889
-58.36	-0.114014	-0.29663	-0.371582	-0.410155	-0.427245	-0.534911
-58.26	-0.123779	-0.29663	-0.373535	-0.416503	-0.432128	-0.539794
-58.16	-0.121826	-0.299072	-0.380859	-0.417969	-0.424316	-0.525635
-58.06	-0.12085	-0.305907	-0.384766	-0.420898	-0.436523	-0.531005
-57.96	-0.130127	-0.308349	-0.385254	-0.421875	-0.4375	-0.52417
-57.86	-0.126221	-0.287354	-0.38623	-0.410157	-0.425782	-0.515382
-57.76	-0.115479	-0.287841	-0.365234	-0.410156	-0.419433	-0.513915
-57.66	-0.122314	-0.288818	-0.37207	-0.410156	-0.408691	-0.498291
-57.56	-0.124756	-0.288818	-0.374512	-0.394531	-0.399902	-0.494385
-57.46	-0.118408	-0.271729	-0.368164	-0.382813	-0.381348	-0.486573
-57.36	-0.109131	-0.281005	-0.343262	-0.387695	-0.369628	-0.492919
-57.26	-0.115479	-0.271728	-0.336426	-0.395996	-0.351562	-0.494385
-57.16	-0.105957	-0.278564	-0.335449	-0.407714	-0.355468	-0.503662
-57.06	-0.104248	-0.313719	-0.343262	-0.410155	-0.364745	-0.521727
-56.96	-0.105225	-0.326416	-0.358887	-0.428222	-0.364257	-0.531982
-56.86	-0.0959473	-0.337157	-0.378418	-0.445312	-0.384277	-0.552001
-56.76	-0.0935059	-0.345947	-0.391602	-0.449218	-0.402343	-0.553954
-56.66	-0.0935059	-0.356933	-0.400391	-0.452392	-0.425048	-0.570312
-56.56	-0.103027	-0.341065	-0.420654	-0.43213	-0.417969	-0.554444
-56.46	-0.0959473	-0.348388	-0.404297	-0.436035	-0.430664	-0.550049
-56.36	-0.109131	-0.331787	-0.401855	-0.424805	-0.420899	-0.538819
-56.26	-0.106689	-0.321533	-0.38623	-0.428223	-0.42041	-0.5271
-56.16	-0.105225	-0.310791	-0.387695	-0.414063	-0.417969	-0.50708
-56.06	-0.0959473	-0.291261	-0.367676	-0.393067	-0.410157	-0.494386
-55.96	-0.0949707	-0.290283	-0.348633	-0.399902	-0.410156	-0.494385
-55.86	-0.105225	-0.288818	-0.337891	-0.402344	-0.417969	-0.494385
-55.76	-0.111572	-0.295166	-0.335449	-0.402344	-0.417969	-0.503662
-55.66	-0.113037	-0.284913	-0.335449	-0.390625	-0.412598	-0.494385
-55.56	-0.0949707	-0.284912	-0.333008	-0.396973	-0.407715	-0.496826
-55.46	-0.0935059	-0.284912	-0.335449	-0.410156	-0.396973	-0.494385
-55.36	-0.0935059	-0.296631	-0.335449	-0.403809	-0.394531	-0.494385
-55.26	-0.105225	-0.290283	-0.341797	-0.402344	-0.394531	-0.494385
-55.16	-0.105225	-0.281006	-0.344727	-0.393067	-0.398438	-0.486573
-55.06	-0.0974121	-0.281006	-0.335449	-0.399902	-0.398438	-0.494385
-54.96	-0.0974121	-0.281006	-0.335449	-0.402344	-0.398438	-0.503662
-54.86	-0.10376	-0.269288	-0.335449	-0.390626	-0.395997	-0.494386
-54.76	-0.105225	-0.269287	-0.314453	-0.396973	-0.398438	-0.494385
-54.66	-0.105225	-0.2771	-0.321289	-0.398438	-0.398438	-0.494385
-54.56	-0.098877	-0.2771	-0.315918	-0.398438	-0.398438	-0.494385
-54.46	-0.0974121	-0.2771	-0.32373	-0.398438	-0.398438	-0.485107
-54.36	-0.0881348	-0.2771	-0.32373	-0.398438	-0.398438	-0.482666
-54.26	-0.0856934	-0.283447	-0.32373	-0.398438	-0.40625	-0.482666
-54.16	-0.0949707	-0.284912	-0.330078	-0.398438	-0.40625	-0.482666
-54.06	-0.0974121	-0.284912	-0.331543	-0.407715	-0.40625	-0.482666
-53.96	-0.105225	-0.273194	-0.331543	-0.389161	-0.394532	-0.480225
-53.86	-0.0998535	-0.266846	-0.319824	-0.395996	-0.394531	-0.482666
-53.76	-0.101318	-0.262452	-0.319824	-0.389161	-0.385255	-0.473389
-53.66	-0.092041	-0.273193	-0.310547	-0.386719	-0.382813	-0.477295
-53.56	-0.0895996	-0.265381	-0.319824	-0.378907	-0.375001	-0.470948
-53.46	-0.0910645	-0.265381	-0.312012	-0.378906	-0.375	-0.470947
-53.36	-0.0842285	-0.265381	-0.312012	-0.378906	-0.375	-0.482666
-53.26	-0.0935059	-0.274657	-0.312012	-0.388183	-0.395995	-0.485595
-53.16	-0.102783	-0.273194	-0.321289	-0.378907	-0.386719	-0.474854
-53.06	-0.0935059	-0.273193	-0.312012	-0.378906	-0.377441	-0.474854
-52.96	-0.102783	-0.273193	-0.319824	-0.378906	-0.375	-0.465576
-52.86	-0.113037	-0.256105	-0.319824	-0.361818	-0.357911	-0.453859
-52.76	-0.0959473	-0.247315	-0.302734	-0.359375	-0.355469	-0.451416
-52.66	-0.0935059	-0.255127	-0.300293	-0.368652	-0.372558	-0.460693
-52.56	-0.102783	-0.269287	-0.303223	-0.382812	-0.375	-0.463135
-52.46	-0.0959473	-0.269287	-0.315918	-0.382813	-0.375	-0.463135
-52.36	-0.0935059	-0.257569	-0.315918	-0.371095	-0.363282	-0.451417
-52.26	-0.0817871	-0.257568	-0.304199	-0.371094	-0.375	-0.451416
-52.16	-0.0935059	-0.257568	-0.304199	-0.371094	-0.375	-0.451416
-52.06	-0.0935059	-0.257568	-0.304199	-0.371094	-0.368652	-0.451416
-51.96	-0.0935059	-0.269287	-0.304199	-0.378906	-0.367188	-0.463135
-51.86	-0.0935059	-0.261475	-0.304199	-0.371094	-0.359376	-0.455323
-51.76	-0.0856934	-0.270751	-0.287109	-0.38037	-0.368652	-0.464599
-51.66	-0.0949707	-0.273193	-0.305664	-0.373535	-0.378906	-0.467041
-51.56	-0.105225	-0.269288	-0.308105	-0.359376	-0.367188	-0.455323
-51.46	-0.0935059	-0.269287	-0.296387	-0.368652	-0.35791	-0.455322
-51.36	-0.0935059	-0.269287	-0.296387	-0.371094	-0.355469	-0.455322
-51.26	-0.0935059	-0.26001	-0.304199	-0.371094	-0.355469	-0.446045
-51.16	-0.0935059	-0.249756	-0.304199	-0.363282	-0.347657	-0.435791
-51.06	-0.0910645	-0.249756	-0.296387	-0.354004	-0.359375	-0.443604
-50.96	-0.0895996	-0.256103	-0.296387	-0.35791	-0.365722	-0.449951
-50.86	-0.0959473	-0.257569	-0.302734	-0.347657	-0.35547	-0.439698
-50.76	-0.0856934	-0.257568	-0.286133	-0.347656	-0.355469	-0.439697
-50.66	-0.0856934	-0.257568	-0.284668	-0.359375	-0.355469	-0.439697
-50.56	-0.0842285	-0.257568	-0.296387	-0.359375	-0.355469	-0.451416
-50.46	-0.0817871	-0.24585	-0.296387	-0.347657	-0.34375	-0.439698
-50.36	-0.0700684	-0.24585	-0.284668	-0.347656	-0.334473	-0.43335
-50.26	-0.0700684	-0.253662	-0.284668	-0.347656	-0.34375	-0.431885
-50.16	-0.0817871	-0.253662	-0.284668	-0.347656	-0.34375	-0.438232
-50.06	-0.0817871	-0.24585	-0.284668	-0.339844	-0.345215	-0.431885
-49.96	-0.0739746	-0.24585	-0.276855	-0.339844	-0.347656	-0.431885
-49.86	-0.0739746	-0.266845	-0.284668	-0.356933	-0.364745	-0.441161
-49.76	-0.083252	-0.269287	-0.293945	-0.359375	-0.367187	-0.443603
-49.66	-0.0856934	-0.262939	-0.296387	-0.359375	-0.367188	-0.451416
-49.56	-0.0974121	-0.249757	-0.308105	-0.347657	-0.35547	-0.439698
-49.46	-0.0856934	-0.249756	-0.296387	-0.347656	-0.355469	-0.439697
-49.36	-0.0856934	-0.256104	-0.296387	-0.347656	-0.355469	-0.439697
-49.26	-0.0856934	-0.249756	-0.296387	-0.339844	-0.347657	-0.431885
-49.16	-0.0856934	-0.257568	-0.294922	-0.339844	-0.338379	-0.443604
-49.06	-0.076416	-0.257568	-0.304199	-0.351563	-0.335938	-0.443604
-48.96	-0.0739746	-0.257568	-0.304199	-0.351563	-0.335938	-0.443604
-48.86	-0.0739746	-0.263916	-0.304199	-0.346192	-0.330567	-0.431885
-48.76	-0.0803223	-0.265381	-0.298828	-0.347656	-0.332031	-0.431885
-48.66	-0.0910645	-0.265381	-0.305664	-0.347656	-0.337402	-0.431885
-48.56	-0.0935059	-0.259033	-0.304199	-0.347656	-0.335938	-0.431885
-48.46	-0.101318	-0.249756	-0.304199	-0.339844	-0.328125	-0.424073
-48.36	-0.0935059	-0.249756	-0.296387	-0.339844	-0.328125	-0.435791
-48.26	-0.0935059	-0.249757	-0.287109	-0.321778	-0.316407	-0.424073
-48.16	-0.0817871	-0.240479	-0.272949	-0.320313	-0.316406	-0.424072
-48.06	-0.0817871	-0.238037	-0.272949	-0.328125	-0.324219	-0.424072
-47.96	-0.0817871	-0.238037	-0.272949	-0.328125	-0.324219	-0.424072
-47.86	-0.0842285	-0.24585	-0.284668	-0.328125	-0.324219	-0.424072
-47.76	-0.0817871	-0.238038	-0.284668	-0.322755	-0.316407	-0.41626
-47.66	-0.0739746	-0.238037	-0.276855	-0.320313	-0.316406	-0.424072
-47.56	-0.0739746	-0.247314	-0.275391	-0.329589	-0.337402	-0.433349
-47.46	-0.083252	-0.243408	-0.282227	-0.332031	-0.339844	-0.435791
-47.36	-0.0793457	-0.230225	-0.284668	-0.329591	-0.328126	-0.424073
-47.26	-0.0739746	-0.230225	-0.272949	-0.332031	-0.328125	-0.424072
-47.16	-0.0739746	-0.230225	-0.272949	-0.332031	-0.328125	-0.424072
-47.06	-0.0739746	-0.230225	-0.272949	-0.332031	-0.328125	-0.424072
-46.96	-0.0739746	-0.241943	-0.284668	-0.332031	-0.328125	-0.424072
-46.86	-0.0856934	-0.236573	-0.293945	-0.326661	-0.330567	-0.43042
-46.76	-0.0803223	-0.238037	-0.281738	-0.328125	-0.332031	-0.431885
-46.66	-0.0725098	-0.238037	-0.280762	-0.339844	-0.322754	-0.422607
-46.56	-0.0700684	-0.230225	-0.288574	-0.332032	-0.312501	-0.412354
-46.46	-0.0622559	-0.230225	-0.280762	-0.332031	-0.3125	-0.412354
-46.36	-0.0700684	-0.239501	-0.280762	-0.332031	-0.321777	-0.42163
-46.26	-0.088623	-0.249756	-0.283691	-0.332031	-0.335937	-0.424072
-46.16	-0.0935059	-0.22876	-0.284668	-0.328125	-0.324219	-0.421631
-46.06	-0.0842285	-0.226318	-0.272949	-0.328125	-0.324219	-0.424072
-45.96	-0.0817871	-0.217041	-0.284668	-0.318848	-0.324219	-0.414795
-45.86	-0.0725098	-0.2146	-0.275391	-0.316406	-0.324219	-0.412354
-45.76	-0.0700684	-0.226318	-0.272949	-0.316406	-0.324219	-0.412354
-45.66	-0.0700684	-0.227783	-0.272949	-0.317871	-0.325684	-0.413818
-45.56	-0.083252	-0.230224	-0.274414	-0.320312	-0.328125	-0.424072
-45.46	-0.0856934	-0.230225	-0.284668	-0.320313	-0.328125	-0.424072
-45.36	-0.0856934	-0.218507	-0.284668	-0.320313	-0.316407	-0.412354
-45.26	-0.0739746	-0.218506	-0.272949	-0.320313	-0.316406	-0.412354
-45.16	-0.0817871	-0.218506	-0.272949	-0.320313	-0.307129	-0.412354
-45.06	-0.0817871	-0.210694	-0.272949	-0.312501	-0.308594	-0.404542
-44.96	-0.0739746	-0.210693	-0.276855	-0.3125	-0.308594	-0.395264
-44.86	-0.0856934	-0.21997	-0.276855	-0.321777	-0.31787	-0.413818
-44.76	-0.0949707	-0.218507	-0.286133	-0.320313	-0.308594	-0.404542
-44.66	-0.0856934	-0.218506	-0.276855	-0.320313	-0.308594	-0.404541
-44.56	-0.0856934	-0.218506	-0.276855	-0.320313	-0.316406	-0.404541
-44.46	-0.0935059	-0.218506	-0.276855	-0.320313	-0.316406	-0.404541
-44.36	-0.0935059	-0.206788	-0.276855	-0.320313	-0.304688	-0.392823
-44.26	-0.0817871	-0.206787	-0.263672	-0.320313	-0.304688	-0.4021
-44.16	-0.0754395	-0.209229	-0.26123	-0.304688	-0.295411	-0.395264
-44.06	-0.076416	-0.198975	-0.251953	-0.29297	-0.285157	-0.385011
-43.96	-0.0661621	-0.208252	-0.241699	-0.302246	-0.294433	-0.394287
-43.86	-0.0754395	-0.210693	-0.262695	-0.311035	-0.296875	-0.396728
-43.76	-0.0778809	-0.210693	-0.265137	-0.3125	-0.296875	-0.396729
-43.66	-0.076416	-0.218506	-0.265137	-0.3125	-0.296875	-0.404541
-43.56	-0.0739746	-0.206788	-0.265137	-0.300782	-0.285157	-0.392823
-43.46	-0.0622559	-0.206787	-0.253418	-0.300781	-0.296875	-0.392822
-43.36	-0.0739746	-0.206787	-0.253418	-0.308594	-0.296875	-0.392822
-43.26	-0.0739746	-0.198975	-0.253418	-0.300782	-0.289063	-0.38501
-43.16	-0.0661621	-0.205322	-0.257324	-0.307129	-0.29541	-0.403076
-43.06	-0.0842285	-0.218506	-0.263672	-0.308594	-0.306152	-0.404541
-42.96	-0.0856934	-0.218506	-0.265137	-0.308594	-0.308594	-0.404541
-42.86	-0.0856934	-0.218506	-0.265137	-0.308594	-0.316406	-0.404541
-42.76	-0.0856934	-0.206788	-0.272949	-0.296876	-0.304688	-0.392823
-42.66	-0.0817871	-0.206787	-0.26123	-0.290527	-0.304688	-0.392822
-42.56	-0.0817871	-0.206787	-0.26123	-0.300781	-0.304688	-0.392822
-42.46	-0.0754395	-0.206787	-0.26123	-0.300781	-0.29541	-0.392822
-42.36	-0.0739746	-0.198975	-0.26123	-0.292969	-0.294434	-0.38501
-42.26	-0.0661621	-0.198975	-0.253418	-0.292969	-0.296875	-0.38501
-42.16	-0.0778809	-0.210693	-0.253418	-0.292969	-0.296875	-0.396729
-42.06	-0.0778809	-0.198975	-0.265137	-0.281251	-0.285157	-0.385011
-41.96	-0.0661621	-0.198975	-0.253418	-0.28125	-0.285156	-0.38501
-41.86	-0.0739746	-0.206787	-0.253418	-0.299316	-0.296875	-0.391357
-41.76	-0.0739746	-0.206787	-0.253418	-0.300781	-0.296875	-0.392822
-41.66	-0.0739746	-0.206787	-0.253418	-0.300781	-0.296875	-0.392822
-41.56	-0.0739746	-0.198975	-0.26123	-0.292969	-0.289063	-0.392823
-41.46	-0.0778809	-0.208252	-0.262695	-0.292969	-0.289063	-0.392822
-41.36	-0.0778809	-0.198975	-0.265137	-0.281251	-0.277345	-0.381104
-41.26	-0.0661621	-0.198975	-0.253418	-0.289063	-0.283691	-0.381104
-41.16	-0.0661621	-0.198975	-0.253418	-0.289063	-0.285156	-0.390381
-41.06	-0.0661621	-0.210693	-0.253418	-0.289063	-0.285156	-0.392822
-40.96	-0.0661621	-0.210693	-0.265137	-0.289063	-0.285156	-0.392822
-40.86	-0.0739746	-0.198975	-0.265137	-0.277345	-0.281251	-0.381104
-40.76	-0.0622559	-0.198975	-0.253418	-0.289063	-0.290527	-0.381104
-40.66	-0.0622559	-0.19751	-0.259766	-0.28125	-0.285157	-0.373291
-40.56	-0.0661621	-0.198975	-0.253418	-0.28125	-0.285156	-0.38501
-40.46	-0.0661621	-0.206787	-0.253418	-0.28125	-0.285156	-0.38501
-40.36	-0.0661621	-0.206787	-0.253418	-0.289063	-0.285156	-0.38501
-40.26	-0.0725098	-0.206787	-0.253418	-0.289063	-0.285156	-0.38501
-40.16	-0.0739746	-0.195069	-0.253418	-0.277344	-0.273438	-0.381104
-40.06	-0.0622559	-0.195068	-0.250977	-0.286621	-0.294434	-0.381104
-39.96	-0.0700684	-0.204346	-0.26123	-0.289063	-0.296875	-0.381104
-39.86	-0.0700684	-0.198975	-0.26123	-0.281251	-0.289063	-0.382569
-39.76	-0.0622559	-0.192627	-0.253418	-0.274903	-0.282715	-0.378663
-39.66	-0.0559082	-0.209228	-0.24707	-0.279785	-0.293945	-0.383545
-39.56	-0.0725098	-0.204346	-0.251953	-0.274903	-0.290528	-0.378662
-39.46	-0.067627	-0.202881	-0.258789	-0.285156	-0.289063	-0.377197
-39.36	-0.0754395	-0.191163	-0.257324	-0.273438	-0.277345	-0.371827
-39.26	-0.0661621	-0.19751	-0.254883	-0.273438	-0.277344	-0.373291
-39.16	-0.0661621	-0.198975	-0.257324	-0.279785	-0.277344	-0.38501
-39.06	-0.0778809	-0.206787	-0.257324	-0.28125	-0.277344	-0.38501
-38.96	-0.0778809	-0.198975	-0.257324	-0.28125	-0.269532	-0.377198
-38.86	-0.0700684	-0.198975	-0.249512	-0.28125	-0.277344	-0.377197
-38.76	-0.0778809	-0.198975	-0.249512	-0.28125	-0.286621	-0.386475
-38.66	-0.0842285	-0.177979	-0.263672	-0.260255	-0.268067	-0.367921
-38.56	-0.0646973	-0.187256	-0.244141	-0.257813	-0.265625	-0.365479
-38.46	-0.0622559	-0.187256	-0.241699	-0.257813	-0.265625	-0.365479
-38.36	-0.0622559	-0.187256	-0.241699	-0.269531	-0.277344	-0.365479
-38.26	-0.0739746	-0.188721	-0.253418	-0.261719	-0.269532	-0.365479
-38.16	-0.0661621	-0.191162	-0.245605	-0.270996	-0.275879	-0.365479
-38.06	-0.0739746	-0.191162	-0.245605	-0.273438	-0.277344	-0.365479
-37.96	-0.0739746	-0.179444	-0.245605	-0.261719	-0.265625	-0.360108
-37.86	-0.0622559	-0.179443	-0.243164	-0.261719	-0.265625	-0.361572
-37.76	-0.0622559	-0.187256	-0.245605	-0.261719	-0.265625	-0.361572
-37.66	-0.0622559	-0.177979	-0.245605	-0.252442	-0.256348	-0.352295
-37.56	-0.0646973	-0.175537	-0.236328	-0.257813	-0.265625	-0.361573
-37.46	-0.0622559	-0.170166	-0.233887	-0.246094	-0.253907	-0.349854
-37.36	-0.0505371	-0.18335	-0.233887	-0.246094	-0.253906	-0.349854
-37.26	-0.0505371	-0.18335	-0.233887	-0.252441	-0.263184	-0.349854
-37.16	-0.0583496	-0.16919	-0.233887	-0.239747	-0.259278	-0.335694
-37.06	-0.0534668	-0.167725	-0.226074	-0.25	-0.257813	-0.343506
-36.96	-0.0661621	-0.167725	-0.226074	-0.25	-0.257813	-0.345947
-36.86	-0.0661621	-0.165284	-0.233887	-0.238282	-0.246095	-0.334229
-36.76	-0.0544434	-0.167725	-0.222168	-0.238281	-0.246094	-0.334229
-36.66	-0.0544434	-0.179443	-0.222168	-0.247559	-0.246094	-0.334229
-36.56	-0.0544434	-0.179443	-0.222168	-0.25	-0.246094	-0.334229
-36.46	-0.0622559	-0.179443	-0.222168	-0.25	-0.252441	-0.342041
-36.36	-0.0622559	-0.171631	-0.231445	-0.253907	-0.246094	-0.334229
-36.26	-0.0544434	-0.171631	-0.226074	-0.253906	-0.246094	-0.334229
-36.16	-0.0661621	-0.177979	-0.226074	-0.253906	-0.246094	-0.340576
-36.06	-0.0661621	-0.158449	-0.226074	-0.232912	-0.246095	-0.321046
-35.96	-0.0515137	-0.163818	-0.216797	-0.238281	-0.246094	-0.318604
-35.86	-0.0505371	-0.163818	-0.214355	-0.244629	-0.246094	-0.330322
-35.76	-0.0505371	-0.156006	-0.214355	-0.238282	-0.238282	-0.32251
-35.66	-0.0544434	-0.165283	-0.206543	-0.238281	-0.238281	-0.331787
-35.56	-0.0544434	-0.156007	-0.212891	-0.226563	-0.226563	-0.322511
-35.46	-0.0427246	-0.161377	-0.202637	-0.220215	-0.228028	-0.316162
-35.36	-0.0441895	-0.159912	-0.196289	-0.21875	-0.226563	-0.314697
-35.26	-0.052002	-0.159912	-0.202637	-0.230469	-0.23584	-0.326416
-35.16	-0.0544434	-0.157471	-0.202637	-0.228028	-0.226563	-0.314698
-35.06	-0.0427246	-0.159912	-0.200195	-0.230469	-0.226563	-0.314697
-34.96	-0.0427246	-0.167725	-0.202637	-0.230469	-0.226563	-0.314697
-34.86	-0.0544434	-0.159913	-0.202637	-0.222657	-0.218751	-0.306885
-34.76	-0.0466309	-0.16626	-0.206543	-0.230469	-0.21875	-0.314697
-34.66	-0.0466309	-0.158448	-0.206543	-0.221192	-0.215821	-0.30542
-34.56	-0.0373535	-0.167725	-0.197266	-0.228028	-0.214844	-0.302979
-34.46	-0.0349121	-0.167725	-0.201172	-0.230469	-0.226563	-0.302979
-34.36	-0.052002	-0.156007	-0.202637	-0.218751	-0.214845	-0.291261
-34.26	-0.0427246	-0.156006	-0.190918	-0.21875	-0.214844	-0.302979
-34.16	-0.0427246	-0.156006	-0.190918	-0.225098	-0.214844	-0.302979
-34.06	-0.0427246	-0.148194	-0.190918	-0.218751	-0.207032	-0.304444
-33.96	-0.0466309	-0.157471	-0.192383	-0.230469	-0.207031	-0.306885
-33.86	-0.0466309	-0.161377	-0.202637	-0.224122	-0.209961	-0.300538
-33.76	-0.0466309	-0.159912	-0.196289	-0.222656	-0.210938	-0.306885
-33.66	-0.0466309	-0.148194	-0.194824	-0.210938	-0.207032	-0.295166
-33.56	-0.0349121	-0.154541	-0.183105	-0.210938	-0.207031	-0.295166
-33.46	-0.0427246	-0.156006	-0.183105	-0.220215	-0.213379	-0.295166
-33.36	-0.0427246	-0.167725	-0.194824	-0.230469	-0.214844	-0.295166
-33.26	-0.0427246	-0.158448	-0.194824	-0.221192	-0.205567	-0.303956
-33.16	-0.0334473	-0.148194	-0.185547	-0.210938	-0.195313	-0.295166
-33.06	-0.0349121	-0.148193	-0.18457	-0.217285	-0.207031	-0.295166
-32.96	-0.0349121	-0.148193	-0.187012	-0.21875	-0.207031	-0.295166
-32.86	-0.0441895	-0.148194	-0.187012	-0.218751	-0.195313	-0.283448
-32.76	-0.0349121	-0.157471	-0.175293	-0.21875	-0.20459	-0.283447
-32.66	-0.0349121	-0.159912	-0.187012	-0.21875	-0.207031	-0.29126
-32.56	-0.0349121	-0.159912	-0.187012	-0.21875	-0.207031	-0.29126
-32.46	-0.0466309	-0.150635	-0.193359	-0.201661	-0.189942	-0.274171
-32.36	-0.029541	-0.148194	-0.177734	-0.207031	-0.1875	-0.271729
-32.26	-0.0334473	-0.148193	-0.175293	-0.207031	-0.1875	-0.283447
-32.16	-0.0349121	-0.148193	-0.183105	-0.207031	-0.195313	-0.283447
-32.06	-0.0349121	-0.136475	-0.183105	-0.195313	-0.189942	-0.271729
-31.96	-0.0231934	-0.130127	-0.171387	-0.198242	-0.185059	-0.265381
-31.86	-0.0246582	-0.13501	-0.165039	-0.210938	-0.183594	-0.263916
-31.76	-0.0231934	-0.148193	-0.172852	-0.210938	-0.183594	-0.263916
-31.66	-0.0231934	-0.136475	-0.175293	-0.199219	-0.183594	-0.261475
-31.56	-0.020752	-0.136475	-0.163574	-0.199219	-0.192871	-0.263916
-31.46	-0.0231934	-0.153564	-0.163574	-0.199219	-0.195313	-0.271729
-31.36	-0.0349121	-0.148194	-0.175293	-0.203126	-0.187501	-0.263917
-31.26	-0.0270996	-0.148193	-0.16748	-0.203125	-0.1875	-0.263916
-31.16	-0.0270996	-0.148193	-0.173828	-0.209473	-0.1875	-0.263916
-31.06	-0.0270996	-0.138917	-0.175293	-0.201661	-0.189942	-0.254639
-30.96	-0.0256348	-0.136475	-0.166016	-0.195313	-0.175782	-0.252198
-30.86	-0.0178223	-0.136475	-0.159668	-0.195313	-0.175781	-0.252197
-30.76	-0.0192871	-0.136475	-0.159668	-0.195313	-0.175781	-0.252197
-30.66	-0.0192871	-0.128662	-0.159668	-0.196778	-0.175782	-0.250733
-30.56	-0.0114746	-0.128662	-0.151855	-0.199219	-0.175781	-0.263916
-30.46	-0.0114746	-0.145752	-0.151855	-0.210938	-0.182129	-0.263916
-30.36	-0.0231934	-0.148193	-0.151855	-0.210938	-0.183594	-0.263916
-30.26	-0.0231934	-0.148193	-0.163574	-0.210938	-0.183594	-0.263916
-30.16	-0.0324707	-0.130128	-0.172852	-0.192872	-0.165528	-0.253663
-30.06	-0.0168457	-0.140381	-0.157227	-0.197754	-0.175781	-0.252197
-29.96	-0.0153809	-0.140381	-0.155762	-0.207031	-0.175781	-0.252197
-29.86	-0.0153809	-0.146729	-0.155762	-0.207031	-0.185059	-0.252197
-29.76	-0.0153809	-0.140381	-0.155762	-0.199219	-0.179688	-0.244385
-29.66	-0.0153809	-0.140381	-0.155762	-0.199219	-0.179688	-0.244385
-29.56	-0.0153809	-0.140381	-0.155762	-0.210938	-0.179688	-0.253662
-29.46	-0.0153809	-0.148193	-0.155762	-0.210938	-0.1875	-0.267822
-29.36	-0.0153809	-0.136476	-0.155762	-0.208497	-0.175782	-0.256104
-29.26	-0.0217285	-0.136475	-0.155762	-0.210938	-0.175781	-0.256104
-29.16	-0.0231934	-0.148193	-0.162109	-0.210938	-0.185059	-0.256104
-29.06	-0.0231934	-0.148194	-0.163574	-0.209473	-0.189942	-0.246827
-28.96	-0.013916	-0.148193	-0.154297	-0.207031	-0.1875	-0.244385
-28.86	-0.0192871	-0.140381	-0.151855	-0.208497	-0.179688	-0.244385
-28.76	-0.0114746	-0.140381	-0.15332	-0.210938	-0.179688	-0.244385
-28.66	-0.020752	-0.158447	-0.155762	-0.222656	-0.186035	-0.250732
-28.56	-0.0349121	-0.148194	-0.163574	-0.217286	-0.175782	-0.240479
-28.46	-0.0231934	-0.148193	-0.151855	-0.21875	-0.175781	-0.240479
-28.36	-0.0231934	-0.149659	-0.151855	-0.212403	-0.177247	-0.24585
-28.26	-0.0168457	-0.148193	-0.157227	-0.210938	-0.175781	-0.244385
-28.16	-0.0270996	-0.136475	-0.155762	-0.210938	-0.164063	-0.232666
-28.06	-0.0153809	-0.136475	-0.144043	-0.210938	-0.164063	-0.241943
-27.96	-0.0231934	-0.127198	-0.150391	-0.201661	-0.166504	-0.235108
-27.86	-0.013916	-0.128663	-0.154297	-0.19922	-0.165528	-0.224854
-27.76	-0.0129395	-0.137939	-0.144043	-0.208496	-0.167969	-0.224854
-27.66	-0.0153809	-0.140381	-0.144043	-0.210938	-0.167969	-0.232666
-27.56	-0.0153809	-0.140381	-0.151855	-0.210938	-0.167969	-0.232666
-27.46	-0.0270996	-0.141846	-0.161133	-0.210938	-0.17334	-0.226319
-27.36	-0.0270996	-0.140381	-0.157227	-0.222656	-0.171875	-0.231201
-27.26	-0.0270996	-0.128663	-0.155762	-0.210938	-0.166505	-0.220948
-27.16	-0.0231934	-0.13501	-0.155762	-0.210938	-0.167969	-0.232666
-27.06	-0.0231934	-0.127198	-0.155762	-0.201661	-0.166505	-0.223389
-26.96	-0.013916	-0.136475	-0.146484	-0.207031	-0.164063	-0.220947
-26.86	-0.0114746	-0.136475	-0.151855	-0.216309	-0.164063	-0.230225
-26.76	-0.0114746	-0.128663	-0.151855	-0.210938	-0.156251	-0.224854
-26.66	-0.0246582	-0.137939	-0.144043	-0.210938	-0.165527	-0.224854
-26.56	-0.0270996	-0.131104	-0.15332	-0.201661	-0.158692	-0.215577
-26.46	-0.0178223	-0.124756	-0.146484	-0.199219	-0.144532	-0.201417
-26.36	-0.0100098	-0.124756	-0.144043	-0.205566	-0.15625	-0.201416
-26.26	-0.0114746	-0.124756	-0.144043	-0.207031	-0.15625	-0.213135
-26.16	-0.0192871	-0.124756	-0.144043	-0.207031	-0.15625	-0.213135
-26.06	-0.0192871	-0.122316	-0.144043	-0.192872	-0.148439	-0.198976
-25.96	-0.00513	-0.127197	-0.129883	-0.199219	-0.148438	-0.19751
-25.86	-0.0153809	-0.128662	-0.13623	-0.208496	-0.15625	-0.205322
-25.76	-0.0246582	-0.116944	-0.142578	-0.19922	-0.144532	-0.193604
-25.66	-0.0153809	-0.116943	-0.132324	-0.210938	-0.144531	-0.193604
-25.56	-0.0153809	-0.126221	-0.144043	-0.210938	-0.144531	-0.193604
-25.46	-0.0153809	-0.136475	-0.144043	-0.210938	-0.153809	-0.193604
-25.36	-0.0153809	-0.127198	-0.144043	-0.201661	-0.146973	-0.205323
-25.26	-0.0124512	-0.113038	-0.134766	-0.195314	-0.132814	-0.193605
-25.16	-0.00757	-0.113037	-0.128418	-0.195313	-0.144531	-0.193604
-25.06	-0.00757	-0.113037	-0.128418	-0.195313	-0.144531	-0.201416
-24.96	-0.0168457	-0.118408	-0.128418	-0.200684	-0.138184	-0.195069
-24.86	-0.0129395	-0.109132	-0.12207	-0.191407	-0.128907	-0.185792
-24.76	-0.0153809	-0.109131	-0.124512	-0.191406	-0.128906	-0.185791
-24.66	-0.0153809	-0.109131	-0.124512	-0.191406	-0.136719	-0.19751
-24.56	-0.0153809	-0.130127	-0.124512	-0.191406	-0.143066	-0.19751
-24.46	-0.0153809	-0.132568	-0.124512	-0.212402	-0.144531	-0.19751
-24.36	-0.0153809	-0.120851	-0.13623	-0.193849	-0.132813	-0.185792
-24.26	-0.0153809	-0.128662	-0.124512	-0.200684	-0.153809	-0.192139
-24.16	-0.0217285	-0.128662	-0.132324	-0.210938	-0.15625	-0.201416
-24.06	-0.0310059	-0.12085	-0.132324	-0.203126	-0.148438	-0.193604
-23.96	-0.0231934	-0.11792	-0.133789	-0.193848	-0.139161	-0.184327
-23.86	-0.013916	-0.128662	-0.126953	-0.191406	-0.144531	-0.193604
-23.76	-0.0231934	-0.128662	-0.13623	-0.197754	-0.144531	-0.193604
-23.66	-0.0231934	-0.116944	-0.13623	-0.1875	-0.14209	-0.181885
-23.56	-0.0114746	-0.126221	-0.130859	-0.199219	-0.144531	-0.191162
-23.46	-0.0114746	-0.136475	-0.132324	-0.199219	-0.15625	-0.193604
-23.36	-0.0285645	-0.136475	-0.140137	-0.207031	-0.15625	-0.201416
-23.26	-0.0310059	-0.13501	-0.140137	-0.199219	-0.154786	-0.199952
-23.16	-0.0349121	-0.148193	-0.144043	-0.199219	-0.15625	-0.201416
-23.06	-0.0349121	-0.148193	-0.144043	-0.199219	-0.167969	-0.213135
-22.96	-0.0349121	-0.136475	-0.144043	-0.1875	-0.165528	-0.210694
-22.86	-0.0231934	-0.136475	-0.132324	-0.208496	-0.167969	-0.213135
-22.76	-0.0310059	-0.13794	-0.149414	-0.20459	-0.175782	-0.206788
-22.66	-0.0246582	-0.136475	-0.145508	-0.203125	-0.175781	-0.205322
-22.56	-0.0441895	-0.13794	-0.144043	-0.201661	-0.167969	-0.203858
-22.46	-0.0388184	-0.142823	-0.147949	-0.193848	-0.158692	-0.217041
-22.36	-0.029541	-0.140381	-0.138672	-0.199219	-0.177246	-0.217041
-22.26	-0.0270996	-0.128663	-0.142578	-0.187501	-0.16797	-0.213136
-22.16	-0.0334473	-0.13501	-0.132324	-0.1875	-0.167969	-0.213135
-22.06	-0.0349121	-0.148193	-0.144043	-0.208496	-0.175781	-0.219482
-21.96	-0.0349121	-0.145752	-0.15332	-0.199219	-0.170411	-0.209229
-21.86	-0.0310059	-0.148193	-0.151855	-0.199219	-0.171875	-0.218506
-21.76	-0.0310059	-0.141847	-0.151855	-0.191407	-0.178712	-0.206788
-21.66	-0.026123	-0.140381	-0.137695	-0.191406	-0.179688	-0.217041
-21.56	-0.0388184	-0.146729	-0.145508	-0.208496	-0.179688	-0.226318
-21.46	-0.0388184	-0.136475	-0.159668	-0.199219	-0.167969	-0.217041
-21.36	-0.0412598	-0.127198	-0.154297	-0.189942	-0.167969	-0.207764
-21.26	-0.0334473	-0.13794	-0.146484	-0.186036	-0.16797	-0.203858
-21.16	-0.0231934	-0.140381	-0.144043	-0.199219	-0.174316	-0.213135
-21.06	-0.0441895	-0.138917	-0.144043	-0.199219	-0.166505	-0.203858
-20.96	-0.0373535	-0.124756	-0.144043	-0.187501	-0.164063	-0.189698
-20.86	-0.0231934	-0.127686	-0.132324	-0.181153	-0.157715	-0.192627
-20.76	-0.0246582	-0.128662	-0.144043	-0.188965	-0.165527	-0.193604
-20.66	-0.0231934	-0.132569	-0.144043	-0.183594	-0.160157	-0.192139
-20.56	-0.0334473	-0.138916	-0.13623	-0.195313	-0.160156	-0.205322
-20.46	-0.0349121	-0.131104	-0.145508	-0.192383	-0.165039	-0.196045
-20.36	-0.0427246	-0.116944	-0.146484	-0.179689	-0.152345	-0.181886
-20.26	-0.0310059	-0.110596	-0.132324	-0.17334	-0.145997	-0.184815
-20.16	-0.036377	-0.118409	-0.137695	-0.171875	-0.148438	-0.177979
-20.06	-0.036377	-0.12085	-0.128418	-0.181152	-0.157715	-0.177979
-19.96	-0.0388184	-0.12085	-0.134766	-0.183594	-0.160156	-0.192139
-19.86	-0.0505371	-0.117922	-0.144043	-0.162599	-0.145509	-0.172609
-19.76	-0.0358887	-0.116944	-0.132324	-0.166504	-0.144531	-0.179444
-19.66	-0.0427246	-0.116943	-0.132324	-0.179688	-0.144531	-0.181885
-19.56	-0.0427246	-0.0988783	-0.144043	-0.161622	-0.147462	-0.175538
-19.46	-0.0246582	-0.10669	-0.125977	-0.160156	-0.148438	-0.18335
-19.36	-0.0441895	-0.0998548	-0.130859	-0.143068	-0.131349	-0.168702
-19.26	-0.029541	-0.0974123	-0.115234	-0.157715	-0.136719	-0.16626
-19.16	-0.0349121	-0.115479	-0.124512	-0.160156	-0.143066	-0.172607
-19.06	-0.0412598	-0.0959489	-0.133789	-0.139162	-0.123537	-0.153078
-18.96	-0.0217285	-0.0935059	-0.115234	-0.148438	-0.130371	-0.150635
-18.86	-0.0310059	-0.102783	-0.120605	-0.154785	-0.132813	-0.158447
-18.76	-0.0402832	-0.0910655	-0.120605	-0.142091	-0.130372	-0.144288
-18.66	-0.0285645	-0.101318	-0.115723	-0.140625	-0.128906	-0.1521
-18.56	-0.0270996	-0.101318	-0.116699	-0.149902	-0.138184	-0.154541
-18.46	-0.0349121	-0.0803231	-0.128418	-0.139161	-0.11963	-0.151612
-18.36	-0.0202637	-0.0949709	-0.11377	-0.136719	-0.117188	-0.150635
-18.26	-0.0310059	-0.0910649	-0.120605	-0.130372	-0.118653	-0.144288
-18.16	-0.0339355	-0.0817875	-0.114258	-0.121094	-0.115723	-0.13501
-18.06	-0.0270996	-0.0881348	-0.10498	-0.13916	-0.117188	-0.13501
-17.96	-0.0349121	-0.101318	-0.10498	-0.140625	-0.128906	-0.156006
-17.86	-0.0349121	-0.0803239	-0.114258	-0.119631	-0.107912	-0.137453
-17.76	-0.0256348	-0.077881	-0.107422	-0.117188	-0.114746	-0.13501
-17.66	-0.029541	-0.0871582	-0.10498	-0.117188	-0.117188	-0.142822
-17.56	-0.0310059	-0.0778818	-0.10498	-0.117188	-0.113282	-0.137452
-17.46	-0.0285645	-0.0856934	-0.0932617	-0.126465	-0.119629	-0.138916
-17.36	-0.0427246	-0.0778819	-0.107422	-0.114747	-0.106935	-0.124757
-17.26	-0.0285645	-0.077881	-0.0947266	-0.121094	-0.105469	-0.123291
-17.16	-0.0270996	-0.0778809	-0.0932617	-0.121094	-0.117188	-0.144287
-17.06	-0.0441895	-0.0778818	-0.10498	-0.109376	-0.10547	-0.135011
-16.96	-0.0349121	-0.0778809	-0.0932617	-0.109375	-0.105469	-0.13501
-16.86	-0.0466309	-0.0778816	-0.102539	-0.109376	-0.0961921	-0.125733
-16.76	-0.0373535	-0.0700691	-0.0957031	-0.101563	-0.0952156	-0.123292
-16.66	-0.0334473	-0.0700684	-0.0932617	-0.113281	-0.109375	-0.123291
-16.56	-0.0349121	-0.0778809	-0.0932617	-0.113281	-0.109375	-0.123291
-16.46	-0.0427246	-0.0842285	-0.0932617	-0.113281	-0.109375	-0.129639
-16.36	-0.0544434	-0.0739755	-0.0996094	-0.107911	-0.10547	-0.131104
-16.26	-0.0427246	-0.0793462	-0.101074	-0.11084	-0.105469	-0.124756
-16.16	-0.036377	-0.0778809	-0.0947266	-0.109375	-0.105469	-0.123291
-16.06	-0.0349121	-0.070069	-0.102539	-0.101563	-0.0976568	-0.124756
-15.96	-0.0441895	-0.0583504	-0.097168	-0.0805672	-0.0859383	-0.106202
-15.86	-0.0256348	-0.0661623	-0.0761719	-0.0781252	-0.0976564	-0.111572
-15.76	-0.0349121	-0.0661621	-0.0737305	-0.078125	-0.0976563	-0.111572
-15.66	-0.0349121	-0.0583499	-0.0737305	-0.0820315	-0.089844	-0.10376
-15.56	-0.0334473	-0.0583496	-0.0839844	-0.0820313	-0.0898438	-0.115479
-15.46	-0.0466309	-0.0583501	-0.0854492	-0.0703129	-0.0922856	-0.10376
-15.36	-0.0349121	-0.0554206	-0.0737305	-0.0703132	-0.0844734	-0.10376
-15.26	-0.0334473	-0.0544436	-0.081543	-0.0703127	-0.0820314	-0.10376
-15.16	-0.0310059	-0.0544434	-0.081543	-0.078125	-0.09375	-0.121826
-15.06	-0.0310059	-0.0520028	-0.081543	-0.0664071	-0.0820321	-0.111573
-14.96	-0.0310059	-0.0598147	-0.0698242	-0.0664065	-0.0849612	-0.105225
-14.86	-0.0339355	-0.0505378	-0.0634766	-0.0703132	-0.0781257	-0.105225
-14.76	-0.0270996	-0.0505371	-0.0541992	-0.0703125	-0.078125	-0.115479
-14.66	-0.0349121	-0.0583496	-0.0751953	-0.0703125	-0.0859375	-0.121826
-14.56	-0.0349121	-0.0583496	-0.0776367	-0.0795898	-0.0952148	-0.123291
-14.46	-0.0349121	-0.0466313	-0.0776367	-0.0781254	-0.0859379	-0.111573
-14.36	-0.0231934	-0.049073	-0.0722656	-0.0688484	-0.0883796	-0.102296
-14.26	-0.0256348	-0.0480965	-0.0644531	-0.0649422	-0.0781258	-0.113038
-14.16	-0.0153809	-0.0505371	-0.0541992	-0.078125	-0.0844727	-0.115479
-14.06	-0.0153809	-0.0388193	-0.0712891	-0.0664071	-0.0742196	-0.103761
-13.96	-0.0114746	-0.0529785	-0.0620117	-0.0756836	-0.0742188	-0.10376
-13.86	-0.0114746	-0.0480962	-0.0683594	-0.0717778	-0.0756841	-0.105225
-13.76	-0.0231934	-0.046631	-0.0634766	-0.0703126	-0.0742189	-0.110108
-13.66	-0.0231934	-0.0388187	-0.0737305	-0.074219	-0.0781253	-0.10376
-13.56	-0.0153809	-0.0598145	-0.0751953	-0.0834961	-0.0874023	-0.10376
-13.46	-0.0246582	-0.0412606	-0.0776367	-0.0649422	-0.0688485	-0.0827645
-13.36	-0.013916	-0.0388185	-0.0566406	-0.0625002	-0.0664064	-0.0803224
-13.26	-0.0114746	-0.045166	-0.0541992	-0.0703125	-0.0664063	-0.0739746
-13.16	-0.0231934	-0.0324712	-0.0605469	-0.0561529	-0.0639654	-0.0583502
-13.06	-0.00903	-0.0388185	-0.0556641	-0.0610353	-0.0625001	-0.0632325
-12.96	-0.013916	-0.0178231	-0.0541992	-0.0351571	-0.0322274	-0.0490731
-12.86	0.00562	-0.015381	-0.0332031	-0.0312502	-0.0366213	-0.0451662
-12.76	-0.00366	-0.0270996	-0.0307617	-0.03125	-0.0375977	-0.045166
-12.66	-0.0129395	-0.0153813	-0.0424805	-0.0312504	-0.0327153	-0.0334477
-12.56	-0.0114746	-0.00903	-0.0307617	-0.0249028	-0.0288091	-0.0271001
-12.46	-0.00513	0.000244	-0.0244141	-0.0156254	-0.0195316	-0.0178226
-12.36	0.00415	0.000244	-0.0151367	-0.015625	-0.0195313	-0.0178223
-12.26	-0.00513	-0.00903	-0.0151367	-0.015625	-0.03125	-0.0178223
-12.16	-0.00757	-0.0231934	-0.0151367	-0.0234375	-0.03125	-0.0256348
-12.06	-0.0192871	-0.0022	-0.0151367	-0.00244	-0.0102555	-0.00464
-11.96	-0.00464	0.000244	0.00586	-9.31e-08	-0.00781	-0.0022
-11.86	-0.00366	0.000244	0.0083	0	-0.00781	-0.0022
-11.76	-0.00366	0.00806	-0.00342	0.00781	-0.00781	0.00561
-11.66	-0.00366	-0.00122	0.00439	-0.00146	-0.0170895	-0.00366
-11.56	-0.0129395	-0.0114744	-0.00488	-0.0156248	-0.0195311	-0.0061
-11.46	-0.0153809	0.000244	-0.00732	-0.00391	0.00146	0.00561
-11.36	-0.00366	0.000244	0.00439	-0.00391	0.00391	0.00562
-11.26	-0.0153809	0.000244	0.00439	-0.00391	0.00391	-0.0061
-11.16	-0.0153809	0.00952	-0.0126953	0.00537	0.0131832	0.00317
-11.06	-0.0061	0.000244	0.00342	0.00781	0.00391	0.00562
-10.96	-0.00366	0.00806	-0.000977	0.0156247	0.0117185	0.0134274
-10.86	-0.00366	0.00171	0.00439	0.00781	0.0117188	0.0134277
-10.76	-0.00366	0.00659	0.00439	0.00781	0.0117188	0.0134277
-10.66	-0.0153809	0.0134273	0.00439	0.0195308	0.0234371	0.025146
-10.56	-0.00366	0.00415	0.0161133	0.0195313	0.0234375	0.0251465
-10.46	-0.00366	0.00415	0.0253906	0.0195313	0.0234375	0.0251465
-10.36	-0.00366	0.00415	0.0185547	0.00781	0.0234375	0.0251465
-10.26	-0.00366	0.00415	0.00439	0.00781	0.015625	0.0251465
-10.16	-0.0114746	0.0158687	0.00439	0.0195308	0.0273433	0.0305171
-10.06	0.000244	0.0158691	0.0161133	0.0195313	0.0273438	0.0212402
-9.96001	0.000244	0.0158691	0.0083	0.0195313	0.0273438	0.0212402
-9.86001	0.000244	0.0119623	0.0083	0.0273432	0.0351557	0.0290521
-9.76001	-0.00366	0.0119629	0.0161133	0.0195313	0.0234375	0.0290527
-9.66001	-0.00366	0.0119629	0.0161133	0.0195313	0.0234375	0.017334
-9.56001	-0.00366	0.0119629	0.0161133	0.0195313	0.0141602	0.017334
-9.46001	-0.00366	0.0236812	0.0161133	0.0195308	0.0327144	0.0290523
-9.36001	0.00806	0.0158691	0.027832	0.0195313	0.0351563	0.0290527
-9.26001	-0.00366	0.023681	0.0161133	0.0273432	0.0351557	0.0368646
-9.16001	0.00415	0.0236816	0.0239258	0.0273438	0.0351563	0.0314941
-9.06001	0.00415	0.0119629	0.0239258	0.0273438	0.0351563	0.032959
-8.96001	0.00415	0.00269	0.0239258	0.015625	0.0258789	0.0266113
-8.86001	0.00415	0.011962	0.0239258	0.0273429	0.0234366	0.0368643
-8.76001	0.00806	0.0119629	0.027832	0.0209961	0.0234375	0.0290527
-8.66001	0.00806	0.0119629	0.027832	0.0117188	0.0234375	0.0290527
-8.56001	-0.00122	0.00415	0.027832	0.0117188	0.0234375	0.0290527
-8.46001	-0.00366	0.0119626	0.027832	0.019531	0.0312497	0.0368649
-8.36001	0.00415	0.0119629	0.0239258	0.0195313	0.0131836	0.0368652
-8.26001	-0.00757	0.0119629	0.0146484	0.00781	0.0180664	0.0251465
-8.16001	-0.00757	0.0212394	0.012207	0.0288078	0.0341789	0.0461418
-8.06001	0.0134277	0.0236815	0.0332031	0.0312498	0.0273436	0.0407713
-7.96001	0.0158691	0.0236816	0.0356445	0.03125	0.0273438	0.0407715
-7.86001	0.00806	0.0236816	0.0356445	0.03125	0.0273438	0.0407715
-7.76001	0.00806	0.017334	0.027832	0.0234375	0.0273438	0.0314941
-7.66001	0.00806	0.0300288	0.0214844	0.0283198	0.0415034	0.0432123
-7.56001	0.010498	0.0104979	0.0341797	0.0273436	0.0336913	0.0446776
-7.46001	0.0119629	0.0197749	0.0239258	0.0390621	0.0312496	0.0446773
-7.36001	0.0236816	0.0197754	0.0356445	0.0390625	0.03125	0.0446777
-7.26001	0.017334	0.0197754	0.0263672	0.0390625	0.03125	0.0446777
-7.16001	0.00806	0.0212399	0.0239258	0.0302731	0.040527	0.0476071
-7.06001	0.017334	0.0353993	0.0332031	0.0429677	0.0546864	0.0603017
-6.96001	0.0314941	0.0432126	0.0473633	0.0429685	0.0483395	0.0681149
-6.86001	0.0183105	0.0222168	0.0371094	0.0429688	0.046875	0.0510254
-6.76001	0.0158691	0.0183101	0.027832	0.0283198	0.0415034	0.0432124
-6.66001	0.0222168	0.0251455	0.0341797	0.0390615	0.0454091	0.0563955
-6.56001	0.0236816	0.0236816	0.0473633	0.0273438	0.0351563	0.0563965
-6.46001	0.0236816	0.0197748	0.0356445	0.0351557	0.0429682	0.0642084
-6.36001	0.017334	0.029052	0.0356445	0.0444329	0.0522454	0.0563958
-6.26001	0.0251465	0.0432118	0.0356445	0.0507802	0.0546864	0.0681141
-6.16001	0.0393066	0.0432129	0.0473633	0.0507813	0.0546875	0.0681152
-6.06001	0.0393066	0.0354004	0.0473633	0.0507813	0.0546875	0.0681152
-5.96001	0.0275879	0.0432123	0.0473633	0.0585932	0.0624994	0.0642084
-5.86001	0.026123	0.0222168	0.043457	0.0585938	0.0625	0.064209
-5.76001	0.0158691	0.0197754	0.043457	0.0405273	0.0415039	0.064209
-5.66	0.0158691	0.0314932	0.043457	0.0507804	0.0507804	0.0759268
-5.56001	0.0275879	0.0314941	0.0551758	0.0507813	0.0429688	0.0759277
-5.46001	0.0275879	0.0314941	0.0473633	0.0429688	0.0429688	0.0759277
-5.36001	0.0275879	0.0251459	0.0473633	0.0507807	0.0507807	0.077392
-5.26001	0.0236816	0.0236816	0.0551758	0.0507813	0.0507813	0.064209
-5.16	0.0236816	0.0417467	0.0371094	0.0688463	0.0688463	0.082274
-5.06001	0.041748	0.0432129	0.0537109	0.0703125	0.0639648	0.0837402
-4.96001	0.026123	0.0314941	0.0551758	0.0585938	0.0625	0.0837402
-4.86001	0.0236816	0.0314941	0.0551758	0.0585938	0.0507813	0.0759277
-4.76001	0.0236816	0.043212	0.0473633	0.0610343	0.0624991	0.0876456
-4.66	0.0236816	0.0432129	0.059082	0.0585938	0.0546875	0.0876465
-4.56001	0.0236816	0.0300293	0.0473633	0.0664063	0.0625	0.095459
-4.46001	0.0314941	0.0368645	0.0458984	0.0678704	0.0624993	0.0837395
-4.36001	0.032959	0.0510243	0.0527344	0.0820302	0.0742177	0.0954579
-4.26001	0.0407715	0.0432129	0.0668945	0.0756836	0.0742188	0.0891113
-4.16	0.0275879	0.0432129	0.0551758	0.0625	0.0561523	0.0876465
-4.06001	0.0275879	0.0368652	0.0551758	0.0625	0.0546875	0.079834
-3.96001	0.0275879	0.0314935	0.0473633	0.0610346	0.0624994	0.0876459
-3.86001	0.0144043	0.0222168	0.0488281	0.0507813	0.0546875	0.0783691
-3.76001	0.00415	0.0407699	0.0473633	0.060057	0.075682	0.0852035
-3.66	0.0251465	0.0354002	0.0473633	0.0624998	0.0571287	0.0876463
-3.56001	0.0275879	0.041748	0.0473633	0.0595703	0.0610352	0.0876465
-3.46001	0.0158691	0.0222167	0.0366211	0.0468749	0.0561522	0.0705565
-3.36001	0.0158691	0.0212396	0.0239258	0.0546869	0.0546869	0.0642084
-3.26001	0.00659	0.0329574	0.0253906	0.0615218	0.0664046	0.0852035
-3.16	0.0251465	0.0471181	0.0371094	0.0742177	0.0664052	0.0783681
-3.06001	0.0393066	0.0402832	0.0395508	0.0673828	0.0742188	0.0759277
-2.96001	0.0354004	0.060301	0.0444336	0.0795881	0.0742171	0.0852034
-2.86001	0.0471191	0.0524895	0.0463867	0.0834953	0.074218	0.0876457
-2.76001	0.0549316	0.0612779	0.0473633	0.0883775	0.0712877	0.0964342
-2.66	0.0588379	0.0417479	0.0366211	0.0820311	0.0561522	0.0773925
-2.56001	0.0378418	0.0539551	0.0239258	0.0898438	0.0717773	0.0876465
-2.46001	0.0354004	0.0402825	0.0463867	0.0766595	0.0712884	0.0822747
-2.36001	0.026123	0.0500474	0.0458984	0.077147	0.0732408	0.0852036
-2.26001	0.0227051	0.043212	0.043457	0.0781241	0.0624991	0.0578604
-2.16	0.0158691	0.033934	0.0463867	0.0805649	0.0664047	0.0588363
-2.06001	-0.00122	0.0432129	0.0483398	0.09375	0.0742188	0.0563965
-1.96001	-0.00513	0.043211	0.0551758	0.0834942	0.0568829	0.0773907
-1.86001	-0.0241699	0.045653	0.0410156	0.0883777	0.0571277	0.0744616
-1.76001	-0.0285645	0.0602995	0.0327148	0.118649	0.088864	0.0969206
-1.66	-0.0349121	0.0690888	0.0527344	0.12988	0.100095	0.117429
-1.56001	-0.0231934	0.079834	0.0654297	0.138184	0.104004	0.126709
-1.46001	-0.0168457	0.0729966	0.074707	0.148436	0.110838	0.130614
-1.36001	-0.0270996		0.074707
-1.26001
-1.16
-1.06001
-0.960007
-0.860008
-0.76001
-0.660004
-0.560005
-0.460007
-0.360008
-0.26001
-0.160004
-0.0600052
0.0399933
0.139992
0.23999
0.339996
0.439995
0.539993
0.639992
0.73999
0.839996		-0.0192664		0.168966	0.201925	0.668722
0.939995	0.62085	0.17627	-0.230225	0.429688	0.550293	0.978271
1.03999	0.758789	0.390379	0.0517578	0.704832	0.901365	1.3667
1.13999	0.901123	0.517093	0.348389	0.857181	1.18824	1.64087
1.23999	1.00879	0.720455	0.508301	1.10522	1.48852	2.01538
1.34	1.08618	0.851563	0.758057	1.28149	1.73511	2.2644
1.43999	1.09204	0.962891	0.9375	1.45679	1.94897	2.50732
1.53999	1.13623	1.10205	1.12134	1.62475	2.16162	2.77807
1.63999	1.16821	1.17676	1.28247	1.72388	2.28247	2.97119
1.73999	1.16162	1.25293	1.38599	1.84302	2.43433	3.17334
1.84	1.22754	1.34155	1.4895	1.93433	2.58447	3.34595
1.93999	1.30957	1.40723	1.56372	2.01904	2.70044	3.50952
2.03999	1.36035	1.46314	1.61938	2.12647	2.81812	3.66797
2.13999	1.42725	1.52344	1.69702	2.19312	2.93848	3.80762
2.23999	1.45435	1.52613	1.76514	2.24122	3.01075	3.92237
2.34	1.44556	1.5315	1.80005	2.31592	3.10254	4.04883
2.43999	1.46387	1.59009	1.85376	2.4082	3.21704	4.19971
2.53999	1.50562	1.61084	1.93579	2.46582	3.28907	4.31104
2.63999	1.48706	1.64038	1.96216	2.50415	3.37281	4.42456
2.73999	1.47998	1.66944	2.01221	2.57739	3.46753	4.55737
2.84	1.48633	1.67652	2.06934	2.60694	3.52369	4.65528
2.93999	1.4917	1.69629	2.08496	2.65576	3.59131	4.75024
3.03999	1.47949	1.73169	2.12256	2.6919	3.66162	4.86963
3.13999	1.50366	1.76172	2.15332	2.76319	3.73877	4.97339
3.23999	1.49951	1.77832	2.1936	2.81348	3.80274	5.07178
3.34	1.52905	1.79834	2.23193	2.85474	3.87476	5.16529
3.43999	1.53223	1.81665	2.26172	2.89624	3.95044	5.26416
3.53999	1.55713	1.85352	2.30322	2.94361	4.02368	5.35059
3.63999	1.5769	1.86719	2.33105	2.99512	4.0857	5.44385
3.73999	1.60205	1.90479	2.37354	3.04297	4.14258	5.53467
3.84	1.62012	1.9187	2.41089	3.06494	4.21143	5.63526
3.93999	1.64404	1.93481	2.44067	3.10425	4.25073	5.72266
4.03999	1.66699	1.95728	2.46826	3.14234	4.31079	5.80591
4.13999	1.67847	1.97412	2.48145	3.18262	4.36939	5.89991
4.23999	1.69434	2.00318	2.52832	3.23096	4.41651	5.98999
4.34	1.72559	2.03687	2.5415	3.28198	4.49072	6.10205
4.43999	1.76465	2.04736	2.59106	3.31689	4.53369	6.17383
4.53999	1.77783	2.06421	2.6145	3.3523	4.5791	6.25073
4.63999	1.7959	2.0647	2.63257	3.37476	4.6084	6.32447
4.73999	1.8103	2.09131	2.66187	3.41138	4.67114	6.42456
4.84	1.83667	2.10962	2.70117	3.44434	4.71167	6.49903
4.93999	1.84912	2.12817	2.72632	3.47412	4.77271	6.57324
5.03999	1.86938	2.12769	2.7522	3.49243	4.7937	6.63062
5.13999	1.875	2.13599	2.7627	3.5232	4.83423	6.72412
5.23999	1.88647	2.16724	2.78784	3.55542	4.89038	6.79517
5.34	1.92529	2.17578	2.82129	3.59522	4.94678	6.86499
5.43999	1.93091	2.19849	2.84424	3.62573	4.99219	6.92456
5.53999	1.94873	2.20655	2.87012	3.65332	5.02222	6.9834
5.63999	1.96826	2.20581	2.89233	3.68213	5.06128	7.04517
5.73999	1.97852	2.20825	2.90039	3.70581	5.10352	7.09473
5.84	1.9895	2.23584	2.9165	3.75293	5.16455	7.16528
5.93999	2.00781	2.25562	2.95288	3.76318	5.21167	7.2146
6.03999	2.02734	2.25977	2.96338	3.77954	5.2273	7.26075
6.13999	2.03735	2.2793	2.97412	3.81592	5.28613	7.33521
6.23999	2.05615	2.2898	3.01587	3.844	5.3252	7.38721
6.34	2.06885	2.30713	3.02612	3.86841	5.35523	7.43823
6.43999	2.07813	2.31738	3.03418	3.89673	5.38647	7.49072
6.53999	2.0979	2.32837	3.06445	3.92505	5.43408	7.54736
6.63999	2.12061	2.35816	3.08838	3.95947	5.47656	7.61865
6.73999	2.12378	2.35669	3.11792	3.97534	5.51319	7.65796
6.84	2.12598	2.3794	3.12842	4.0044	5.5354	7.73145
6.93999	2.14868	2.38818	3.14795	4.03418	5.57983	7.78711
7.03999	2.16455	2.40869	3.16138	4.05713	5.62451	7.84912
7.13999	2.19116	2.42383	3.18677	4.09839	5.66602	7.90088
7.23999	2.19434	2.42774	3.2085	4.1167	5.6958	7.95557
7.34	2.19971	2.43335	3.22656	4.13916	5.72608	8.00318
7.43999	2.20996	2.44922	3.22827	4.15991	5.76782	8.05371
7.53999	2.21948	2.45972	3.25806	4.1853	5.79395	8.09717
7.63999	2.22754	2.48023	3.27173	4.21045	5.83765	8.15112
7.73999	2.25024	2.49121	3.29688	4.21509	5.86817	8.19898
7.84	2.27051	2.50049	3.31494	4.24365	5.90137	8.25269
7.93999	2.27271	2.51074	3.32495	4.26587	5.93188	8.29272
8.03999	2.27881	2.50244	3.33667	4.27832	5.94531	8.3313
8.13999	2.28125	2.52051	3.34546	4.29761	5.98316	8.40015
8.23999	2.30957	2.53882	3.37769	4.33423	6.02222	8.4419
8.34	2.31982	2.55078	3.38794	4.36035	6.05591	8.48877
8.43999	2.3291	2.54199	3.40527	4.3501	6.06665	8.5022
8.53999	2.32275	2.55103	3.40137	4.38574	6.10449	8.55713
8.63999	2.33789	2.5603	3.41333	4.40772	6.13233	8.59082
8.73999	2.33716	2.56958	3.42749	4.42774	6.16187	8.61719
8.84	2.3479	2.59131	3.43604	4.45068	6.20557	8.68213
8.93999	2.37207	2.59033	3.46021	4.46802	6.23315	8.70825
9.03999	2.36841	2.59473	3.4668	4.47998	6.25488	8.75025
9.13999	2.37817	2.6062	3.47754	4.50757	6.28418	8.79077
9.23999	2.39966	2.62012	3.49658	4.52954	6.32324	8.83911
9.34	2.41138	2.63062	3.52075	4.5459	6.33399	8.87232
9.43999	2.41699	2.63354	3.5271	4.56299	6.36841	8.9043
9.53999	2.43335	2.64136	3.54932	4.57764	6.40357	8.94873
9.63999	2.43872	2.66187	3.56641	4.6084	6.43579	8.99365
9.73999	2.45044	2.67066	3.58008	4.63745	6.46484	9.02173
9.84	2.46631	2.68091	3.59814	4.65772	6.47339	9.06006
9.93999	2.47192	2.70215	3.61157	4.67065	6.50684	9.10547
10.04	2.48828	2.70386	3.63037	4.69312	6.53418	9.13696
10.14	2.4834	2.72192	3.64282	4.719	6.56567	9.17236
10.24	2.48999	2.71655	3.64941	4.73096	6.58374	9.20069
10.34	2.50806	2.72193	3.66113	4.75025	6.59839	9.23242
10.44	2.51465	2.74146	3.67114	4.78149	6.63428	9.27368
10.54	2.53271	2.74707	3.69995	4.79492	6.65674	9.30664
10.64	2.54077	2.74439	3.70166	4.78882	6.66577	9.32984
10.74	2.54321	2.7439	3.71069	4.81983	6.68262	9.35376
10.84	2.5271	2.75513	3.7063	4.83106	6.7168	9.39673
10.94	2.55127	2.76172	3.72925	4.84839	6.74365	9.41943
11.04	2.56055	2.77344	3.73413	4.86817	6.7583	9.45166
11.14	2.57202	2.79004	3.74902	4.88989	6.77319	9.48364
11.24	2.5769	2.79053	3.75903	4.91016	6.79175	9.50855
11.34	2.58789	2.80493	3.75732	4.9292	6.82446	9.5415
11.44	2.59155	2.81274	3.77637	4.94385	6.83472	9.56543
11.54	2.60205	2.81812	3.78101	4.95386	6.85791	9.60523
11.64	2.61499	2.82178	3.80127	4.96436	6.87744	9.61328
11.74	2.61987	2.82617	3.81104	4.98169	6.89697	9.65601
11.84	2.63379	2.83228	3.82324	4.98902	6.90576	9.67261
11.94	2.61304	2.84058	3.84106	4.99976	6.92114	9.70874
12.04	2.6333	2.85718	3.8479	5.01636	6.95117	9.7417
12.14	2.63989	2.85596	3.86597	5.03125	6.97192	9.77393
12.24	2.63843	2.8728	3.88037	5.04907	6.99414	9.79077
12.34	2.65674	2.87695	3.89087	5.06494	7.01709	9.81201
12.44	2.66968	2.87573	3.8999	5.08057	7.02246	9.83862
12.54	2.67261	2.88574	3.90771	5.09961	7.06226	9.87158
12.64	2.67847	2.87964	3.92725	5.09229	7.06372	9.89087
12.74	2.67114	2.91235	3.94409	5.11987	7.10425	9.92236
12.84	2.69067	2.90674	3.97046	5.13233	7.11402	9.93775
12.94	2.69141	2.92432	3.96875	5.15088	7.13354	9.97607
13.04	2.70068	2.9314	3.99927	5.1582	7.15381	9.99878
13.14	2.70313	2.92407	4	5.15943	7.16821	10.0027
13.24	2.70215	2.93433	4.00537	5.16016	7.16968	10.0291
13.34	2.70093	2.93433	4.00952	5.18945	7.2085	10.0623
13.44	2.71753	2.93433	4.02612	5.19092	7.22241	10.0703
13.54	2.71094	2.95093	4.03125	5.20606	7.23633	10.1077
13.64	2.72656	2.9646	4.04297	5.21314	7.25903	10.1433
13.74	2.74268	2.97315	4.05273	5.23731	7.28662	10.1606
13.84	2.75732	2.95606	4.05664	5.23877	7.28955	10.1711
13.94	2.75903	2.98242	4.05957	5.25537	7.32666	10.2078
14.04	2.77051	2.97315	4.07666	5.25806	7.31909	10.2219
14.14	2.77075	2.97339	4.06982	5.26953	7.34473	10.2361
14.24	2.76147	2.99292	4.0752	5.29517	7.36719	10.2664
14.34	2.79712	2.99634	4.09644	5.29053	7.37842	10.2805
14.44	2.79248	3.00415	4.09863	5.30298	7.38696	10.3062
14.54	2.7981	3.00635	4.09546	5.31348	7.40527	10.3245
14.64	2.81323	3.02368	4.11133	5.32764	7.427	10.3384
14.74	2.82104	3.01978	4.1272	5.32764	7.43311	10.3564
14.84	2.8291	3.02002	4.12964	5.35083	7.45532	10.3774
14.94	2.82886	3.0249	4.12549	5.37158	7.45898	10.3994
15.04	2.83008	3.01196	4.13696	5.36524	7.46509	10.4121
15.14	2.82764	3.04175	4.13721	5.37598	7.47534	10.438
15.24	2.84839	3.04077	4.14893	5.38989	7.5	10.4473
15.34	2.85474	3.04932	4.15503	5.39575	7.50513	10.4741
15.44	2.85596	3.05884	4.15625	5.3999	7.52148	10.4858
15.54	2.87329	3.04443	4.17969	5.41992	7.53589	10.5068
15.64	2.87964	3.06104	4.16943	5.43481	7.55371	10.5271
15.74	2.89136	3.05615	4.19385	5.42749	7.55493	10.5313
15.84	2.88257	3.06396	4.18652	5.44653	7.57837	10.5581
15.94	2.89771	3.06348	4.20557	5.43848	7.60083	10.5735
16.04	2.90161	3.06494	4.20679	5.42383	7.58667	10.5774
16.14	2.89893	3.07105	4.2063	5.44995	7.61353	10.595
16.24	2.90698	3.06543	4.21411	5.45581	7.61646	10.6243
16.34	2.90845	3.06299	4.22754	5.45581	7.62207	10.635
16.44	2.91309	3.0791	4.23608	5.47729	7.65454	10.6587
16.54	2.92896	3.08154	4.24487	5.47266	7.66333	10.6777
16.64	2.92725	3.08154	4.25684	5.48608	7.66602	10.6963
16.74	2.92407	3.07349	4.24536	5.49219	7.67456	10.7048
16.84	2.92871	3.07324	4.25146	5.49658	7.69141	10.7178
16.94	2.92993	3.10815	4.25562	5.5127	7.70654	10.741
17.04	2.94702	3.094	4.27197	5.50757	7.70264	10.7449
17.14	2.94019	3.09888	4.27588	5.52075	7.71802	10.7722
17.24	2.94702	3.10938	4.28223	5.5415	7.74023	10.7927
17.34	2.95703	3.12036	4.29419	5.54761	7.7627	10.8247
17.44	2.9751	3.12866	4.31152	5.5708	7.77563	10.8428
17.54	2.98413	3.12476	4.32495	5.56836	7.79248	10.845
17.64	2.96997	3.11792	4.30884	5.56543	7.78174	10.8513
17.74	2.97485	3.12842	4.30103	5.56274	7.7998	10.8696
17.84	2.99341	3.14014	4.31934	5.58496	7.81763	10.9023
17.94	2.98804	3.14893	4.33496	5.59473	7.81616	10.9214
18.04	2.99585	3.15015	4.34521	5.58154	7.8186	10.9148
18.14	2.98779	3.16309	4.32544	5.59473	7.83032	10.9421
18.24	3.00879	3.16772	4.35278	5.60327	7.854	10.9597
18.34	3.00806	3.177	4.34448	5.60986	7.85669	10.9797
18.44	3.01245	3.16919	4.36133	5.61621	7.86841	10.991
18.54	3.0188	3.17554	4.3623	5.61841	7.87695	10.9985
18.64	3.03296	3.18579	4.37769	5.63281	7.88574	11.0208
18.74	3.04883	3.17651	4.38037	5.63281	7.89868	11.0112
18.84	3.03809	3.18042	4.38257	5.64673	7.90088	11.0322
18.94	3.04956	3.1748	4.37476	5.64771	7.91064	11.041
19.04	3.05591	3.18164	4.3772	5.65039	7.90405	11.0383
19.14	3.05347	3.19727	4.37842	5.65967	7.93286	11.0576
19.24	3.06665	3.18774	4.38916	5.67774	7.92456	11.0693
19.34	3.06519	3.198	4.40015	5.67358	7.93701	11.061
19.44	3.06885	3.19922	4.40161	5.69067	7.94775	11.0898
19.54	3.07666	3.21387	4.41064	5.70215	7.95386	11.1016
19.64	3.07422	3.21094	4.41699	5.69678	7.9729	11.1023
19.74	3.08057	3.21118	4.43408	5.69141	7.96655	11.1091
19.84	3.08716	3.22021	4.4248	5.69263	7.98438	11.123
19.94	3.09644	3.21484	4.43237	5.7019	7.9895	11.1245
20.04	3.10034	3.22241	4.44263	5.71582	8.00586	11.1328
20.14	3.10815	3.21704	4.43213	5.71069	8.00342	11.1421
20.24	3.1084	3.21851	4.44165	5.729	8.01611	11.1577
20.34	3.11743	3.21607	4.43237	5.71948	8.01294	11.1497
20.44	3.11597	3.22461	4.44165	5.72876	8.01172	11.1665
20.54	3.12769	3.21851	4.4502	5.72339	8.02197	11.1675
20.64	3.11987	3.20899	4.44409	5.72022	8.02393	11.1687
20.74	3.12866	3.21558	4.44385	5.72827	8.03442	11.1958
20.84	3.12109	3.21802	4.44995	5.73071	8.03125	11.1995
20.94	3.12598	3.22412	4.45117	5.75781	8.02979	11.2148
21.04	3.13525	3.22559	4.46045	5.74048	8.03833	11.2185
21.14	3.12573	3.22559	4.45337	5.7561	8.04736	11.2246
21.24	3.13281	3.23169	4.45874	5.76685	8.06665	11.2351
21.34	3.13525	3.22266	4.46484	5.7666	8.05591	11.2437
21.44	3.12329	3.21875	4.46362	5.7688	8.05957	11.2361
21.54	3.13501	3.22632	4.4519	5.77783	8.08887	11.2642
21.64	3.14648	3.23511	4.46826	5.78638	8.08984	11.2771
21.74	3.16357	3.23657	4.46704	5.79736	8.10791	11.2859
21.84	3.1582	3.24561	4.47876	5.79785	8.12695	11.3025
21.94	3.1582	3.24658	4.4873	5.80884	8.13843	11.3159
22.04	3.17554	3.23608	4.49023	5.79639	8.13648	11.3242
22.14	3.16699	3.25024	4.47778	5.8125	8.16138	11.3428
22.24	3.17383	3.2544	4.49414	5.81763	8.16626	11.3425
22.34	3.17651	3.24365	4.50562	5.82471	8.17236	11.343
22.44	3.17749	3.25122	4.49976	5.82739	8.18286	11.3535
22.54	3.17212	3.25488	4.50879	5.83618	8.19507	11.3599
22.64	3.17358	3.25464	4.51782	5.8374	8.20483	11.3525
22.74	3.17334	3.26123	4.51343	5.85303	8.22192	11.3823
22.84	3.17725	3.26563	4.53589	5.85034	8.23633	11.375
22.94	3.17749	3.27393	4.53833	5.86426	8.24487	11.3823
23.04	3.18677	3.2749	4.54736	5.86817	8.24683	11.3862
23.14	3.177	3.2832	4.53491	5.87817	8.26367	11.4016
23.24	3.19531	3.28833	4.54736	5.88232	8.26465	11.4146
23.34	3.19019	3.28784	4.55859	5.89893	8.2749	11.4263
23.44	3.19824	3.28394	4.55859	5.88818	8.28247	11.4348
23.54	3.18579	3.30225	4.55811	5.90405	8.28979	11.4517
23.64	3.2019	3.2937	4.57251	5.9126	8.29175	11.4521
23.74	3.20117	3.28394	4.57593	5.91553	8.29077	11.4519
23.84	3.19556	3.31226	4.57373	5.927	8.31225	11.4824
23.94	3.20825	3.30444	4.58911	5.92651	8.31079	11.4832
24.04	3.2146	3.3042	4.5769	5.94238	8.32031	11.4873
24.14	3.20557	3.31323	4.58643	5.94189	8.32568	11.4971
24.24	3.21313	3.31006	4.59106	5.94312	8.3291	11.501
24.34	3.20508	3.31567	4.59351	5.95923	8.33984	11.5103
24.44	3.2251	3.30371	4.60962	5.94531	8.33813	11.511
24.54	3.2063	3.31909	4.5957	5.95972	8.34937	11.5281
24.64	3.21313	3.31445	4.60254	5.96655	8.35864	11.5308
24.74	3.22339	3.32373	4.60522	5.97339	8.36841	11.5496
24.84	3.22705	3.31494	4.61621	5.96704	8.3667	11.5493
24.94	3.2124	3.32031	4.60303	5.97241	8.3772	11.5676
25.04	3.22217	3.31738	4.62231	5.99048	8.3833	11.574
25.14	3.23267	3.33179	4.62378	5.99121	8.39453	11.5815
25.24	3.23193	3.33398	4.63135	5.99683	8.3999	11.5908
25.34	3.23755	3.33252	4.6355	5.99243	8.39649	11.5994
25.44	3.24512	3.33276	4.63501	6.00317	8.4165	11.5999
25.54	3.24268	3.323	4.63257	5.99341	8.40772	11.5989
25.64	3.23462	3.3374	4.63403	6.01318	8.42456	11.6157
25.74	3.25562	3.3374	4.64233	6.01929	8.43213	11.6338
25.84	3.25122	3.35059	4.65039	6.02759	8.43726	11.6482
25.94	3.27124	3.34131	4.65454	6.01392	8.44336	11.6455
26.04	3.25659	3.35034	4.65405	6.01782	8.44434	11.6494
26.14	3.25293	3.35913	4.66064	6.03052	8.45703	11.6565
26.24	3.26416	3.36743	4.66919	6.03491	8.46899	11.6672
26.34	3.27734	3.37061	4.67749	6.04199	8.46436	11.6758
26.44	3.27344	3.36401	4.68091	6.04077	8.47314	11.6746
26.54	3.26465	3.37036	4.67407	6.05493	8.47852	11.6902
26.64	3.26636	3.36011	4.68359	6.04956	8.48291	11.6948
26.74	3.27979	3.36914	4.68262	6.07153	8.49194	11.717
26.84	3.28394	3.36353	4.69067	6.05444	8.4856	11.7085
26.94	3.27393	3.36011	4.68774	6.07178	8.4917	11.7131
27.04	3.28394	3.36987	4.69238	6.06299	8.50146	11.7285
27.14	3.29126	3.37036	4.69165	6.0791	8.50049	11.7361
27.24	3.29565	3.36987	4.69824	6.08789	8.51025	11.7449
27.34	3.29346	3.38037	4.70459	6.09375	8.52344	11.7593
27.44	3.29956	3.38306	4.71387	6.09399	8.52954	11.7642
27.54	3.30298	3.38892	4.72241	6.09912	8.53149	11.769
27.64	3.30103	3.39038	4.73022	6.10571	8.53052	11.7744
27.74	3.30298	3.39673	4.73047	6.1123	8.53101	11.7869
27.84	3.31055	3.38013	4.7417	6.10816	8.53784	11.7844
27.94	3.30566	3.39404	4.72217	6.12769	8.54785	11.804
28.04	3.3103	3.39795	4.73511	6.12134	8.5398	11.8037
28.14	3.30566	3.39014	4.74219	6.11816	8.54736	11.7959
28.24	3.31055	3.39917	4.73999	6.13281	8.56055	11.8049
28.34	3.31177	3.39868	4.74023	6.1311	8.55713	11.8135
28.44	3.31152	3.40991	4.74512	6.14014	8.56885	11.824
28.54	3.32104	3.39844	4.75317	6.14893	8.56836	11.8328
28.64	3.32324	3.40674	4.75659	6.15039	8.58008	11.8435
28.74	3.32324	3.40894	4.77124	6.14478	8.5874	11.8418
28.84	3.32349	3.40894	4.76953	6.14404	8.58081	11.8457
28.94	3.32324	3.41919	4.76172	6.14868	8.58862	11.8518
29.04	3.32422	3.41162	4.76807	6.15894	8.58936	11.8623
29.14	3.32227	3.42651	4.76025	6.16943	8.59814	11.8789
29.24	3.33716	3.42041	4.7793	6.15894	8.60327	11.873
29.34	3.33374	3.41479	4.7688	6.16772	8.61475	11.8865
29.44	3.33203	3.41919	4.76733	6.17212	8.61597	11.8838
29.54	3.34009	3.42651	4.77808	6.1792	8.62622	11.8904
29.64	3.34253	3.4397	4.78027	6.18066	8.6377	11.9033
29.74	3.34814	3.43945	4.78809	6.17749	8.63574	11.9124
29.84	3.35278	3.43677	4.78638	6.18896	8.63452	11.9238
29.94	3.354	3.43652	4.79077	6.19873	8.65674	11.9233
30.04	3.35449	3.44775	4.79834	6.19971	8.65771	11.9316
30.14	3.35156	3.44019	4.79688	6.2063	8.65454	11.9434
30.24	3.35107	3.43506	4.80933	6.19605	8.65332	11.9336
30.34	3.34375	3.43921	4.80078	6.19971	8.66602	11.9517
30.44	3.34863	3.44434	4.79761	6.20508	8.66479	11.9414
30.54	3.35303	3.43579	4.80444	6.20557	8.66553	11.9475
30.64	3.35083	3.45532	4.81055	6.21802	8.6814	11.9731
30.74	3.36084	3.44507	4.81982	6.20825	8.68482	11.9709
30.84	3.36035	3.44116	4.80786	6.20679	8.67798	11.9761
30.94	3.34448	3.45557	4.79858	6.21948	8.68726	11.9836
31.04	3.3623	3.43848	4.81567	6.21167	8.6814	11.9783
31.14	3.35474	3.45654	4.81982	6.21851	8.69165	12.001
31.24	3.36133	3.44922	4.8269	6.21606	8.68262	11.9927
31.34	3.36304	3.44995	4.82739	6.23022	8.69678	11.9937
31.44	3.36401	3.46582	4.83105	6.23779	8.70435	12.0107
31.54	3.36304	3.46045	4.8374	6.23169	8.70166	12.0137
31.64	3.36157	3.46704	4.8374	6.23999	8.70215	12.0154
31.74	3.36523	3.45752	4.84106	6.24683	8.71289	12.0195
31.84	3.36133	3.46387	4.83838	6.23853	8.71362	12.0205
31.94	3.37158	3.47705	4.83813	6.25488	8.73071	12.0415
32.04	3.38086	3.47827	4.85498	6.2605	8.73169	12.0425
32.14	3.38208	3.47412	4.85913	6.26318	8.729	12.0476
32.24	3.38086	3.47974	4.85498	6.25024	8.73706	12.0527
32.34	3.37524	3.47681	4.8562	6.25806	8.7417	12.0515
32.44	3.37183	3.46875	4.85913	6.25757	8.73999	12.0706
32.54	3.38306	3.48291	4.86646	6.26611	8.75928	12.0691
32.64	3.3894	3.48584	4.86499	6.25635	8.75342	12.0688
32.74	3.37183	3.48804	4.86841	6.27417	8.76269	12.0806
32.84	3.38672	3.48779	4.87646	6.27881	8.76563	12.0889
32.94	3.39502	3.49438	4.87671	6.27417	8.77026	12.0974
33.04	3.38916	3.4895	4.87524	6.27319	8.76392	12.0925
33.14	3.38574	3.48511	4.87915	6.27686	8.76099	12.1001
33.24	3.3894	3.48462	4.875	6.26855	8.76978	12.1086
33.34	3.3811	3.50513	4.86694	6.27563	8.77734	12.1184
33.44	3.39209	3.49951	4.8855	6.28882	8.78955	12.1313
33.54	3.40137	3.50171	4.88989	6.29346	8.78882	12.1189
33.64	3.39185	3.49829	4.88501	6.30176	8.79297	12.1306
33.74	3.40356	3.50147	4.88647	6.28418	8.78857	12.1306
33.84	3.39185	3.50708	4.896	6.29639	8.79126	12.1389
33.94	3.40112	3.5144	4.89819	6.30615	8.7998	12.1528
34.04	3.41211	3.52368	4.9043	6.31567	8.79858	12.158
34.14	3.41016	3.51855	4.90869	6.31494	8.80737	12.167
34.24	3.40967	3.51831	4.91602	6.29981	8.81006	12.1658
34.34	3.40503	3.50342	4.90796	6.30469	8.80688	12.1587
34.44	3.40015	3.51489	4.8938	6.30884	8.80322	12.1602
34.54	3.4021	3.51514	4.90698	6.31226	8.8064	12.168
34.64	3.40967	3.52344	4.90527	6.31787	8.80933	12.1692
34.74	3.41113	3.53735	4.9187	6.31738	8.81763	12.1897
34.84	3.41089	3.54004	4.92578	6.32007	8.81396	12.1875
34.94	3.41357	3.53369	4.91309	6.32861	8.82446	12.1965
35.04	3.42188	3.53735	4.92261	6.33545	8.8252	12.1997
35.14	3.41968	3.54272	4.92847	6.33691	8.82715	12.2041
35.24	3.42163	3.53735	4.93384	6.33691	8.84058	12.2104
35.34	3.42114	3.54272	4.9375	6.34229	8.83545	12.2158
35.44	3.42188	3.55371	4.93555	6.3562	8.85571	12.2297
35.54	3.43115	3.54639	4.94238	6.34692	8.84912	12.2297
35.64	3.42383	3.5647	4.93774	6.35254	8.86499	12.2361
35.74	3.42139	3.55811	4.94678	6.34985	8.85693	12.2312
35.84	3.42407	3.55371	4.93604	6.35327	8.86304	12.2439
35.94	3.42871	3.55566	4.94409	6.36157	8.86914	12.252
36.04	3.43042	3.56274	4.95728	6.36401	8.87451	12.2556
36.14	3.43042	3.56445	4.95288	6.37329	8.87744	12.261
36.24	3.43335	3.55273	4.94678	6.37573	8.88623	12.2568
36.34	3.4314	3.56543	4.95581	6.37573	8.88867	12.2698
36.44	3.43945	3.56812	4.95703	6.36768	8.89746	12.2725
36.54	3.43433	3.54712	4.9563	6.37549	8.88696	12.2683
36.64	3.42114	3.56006	4.94897	6.37695	8.88843	12.2786
36.74	3.43164	3.57568	4.96338	6.38452	8.90503	12.2878
36.84	3.44849	3.5625	4.97583	6.3833	8.89429	12.2876
36.94	3.43408	3.57666	4.96436	6.38623	8.896	12.2878
37.04	3.4397	3.57251	4.9585	6.37256	8.89429	12.2876
37.14	3.43018	3.56396	4.96167	6.37524	8.89258	12.2939
37.24	3.42749	3.58105	4.96387	6.38306	8.91528	12.3101
37.34	3.44116	3.58423	4.97363	6.39624	8.91577	12.3079
37.44	3.43896	3.58228	4.98486	6.39478	8.92236	12.3123
37.54	3.44092	3.59351	4.98511	6.38672	8.91724	12.3186
37.64	3.44824	3.58472	4.97534	6.38525	8.90527	12.3147
37.74	3.42236	3.58154	4.9707	6.39209	8.92065	12.3354
37.84	3.43384	3.59619	4.98364	6.39453	8.91821	12.3289
37.94	3.44336	3.58154	4.98438	6.38354	8.90332	12.3262
38.04	3.42725	3.59082	4.97412	6.40283	8.92187	12.3354
38.14	3.44092	3.59497	4.99146	6.40332	8.91333	12.3469
38.24	3.43896	3.59351	4.98608	6.40503	8.90967	12.3369
38.34	3.42896	3.60474	4.98584	6.40308	8.92554	12.3557
38.44	3.44019	3.60254	4.99219	6.41138	8.92358	12.3484
38.54	3.44067	3.59473	4.99268	6.41382	8.92212	12.3584
38.64	3.43872	3.60376	4.99463	6.40894	8.92505	12.3604
38.74	3.44482	3.60303	4.99658	6.41455	8.92334	12.3582
38.84	3.43848	3.60229	5.00366	6.42017	8.92944	12.3713
38.94	3.4375	3.59351	5.01318	6.41284	8.93237	12.3679
39.04	3.42969	3.60303	5.00537	6.41479	8.92944	12.3689
39.14	3.42993	3.61133	5.00513	6.42432	8.94531	12.3765
39.24	3.44678	3.61377	5.00513	6.42236	8.94067	12.3831
39.34	3.44922	3.61377	5.01294	6.43384	8.95142	12.3875
39.44	3.44922	3.61377	5.0144	6.43799	8.95239	12.3894
39.54	3.45337	3.61987	5.01685	6.43311	8.95361	12.3843
39.64	3.44604	3.62451	5.02173	6.43701	8.96289	12.396
39.74	3.44971	3.62256	5.01587	6.43286	8.95972	12.3843
39.84	3.4502	3.62451	5.01392	6.43286	8.96411	12.4053
39.94	3.45215	3.63159	5.01587	6.44458	8.97095	12.4194
40.04	3.45776	3.61499	5.03076	6.44214	8.9646	12.4077
40.14	3.4519	3.63159	5.02441	6.4563	8.96704	12.4155
40.24	3.4502	3.63599	5.03223	6.4563	8.98486	12.4194
40.34	3.45215	3.63379	5.03931	6.4563	8.97314	12.4153
40.44	3.44995	3.63306	5.0332	6.45337	8.97852	12.4258
40.54	3.4585	3.63306	5.03589	6.45117	8.97095	12.426
40.64	3.46094	3.63306	5.03223	6.4624	8.98218	12.436
40.74	3.46094	3.62109	5.02441	6.46289	8.97705	12.426
40.84	3.44897	3.62109	5.02954	6.46484	8.9895	12.4358
40.94	3.46069	3.64233	5.03296	6.47461	8.9939	12.4377
41.04	3.46875	3.64453	5.04272	6.47656	9.00122	12.4475
41.14	3.46094	3.64453	5.04785	6.47485	8.99072	12.4456
41.24	3.46069	3.64453	5.04395	6.47656	9.00073	12.4568
41.34	3.46069	3.65332	5.04736	6.4834	9.01001	12.4568
41.44	3.46851	3.65137	5.06177	6.48877	9.00757	12.4636
41.54	3.46851	3.65308	5.05151	6.49487	9.00977	12.4565
41.64	3.46851	3.65527	5.06299	6.49487	9.01099	12.4688
41.74	3.47217	3.65064	5.05811	6.49463	9.01953	12.4761
41.84	3.46826	3.64551	5.06372	6.49463	9.03027	12.4773
41.94	3.47217	3.65063	5.06592	6.49487	9.021	12.4734
42.04	3.46826	3.65234	5.06396	6.49194	9.01929	12.4775
42.14	3.4668	3.6521	5.06274	6.4939	9.02637	12.4736
42.24	3.45801	3.6521	5.06055	6.4917	9.0293	12.4773
42.34	3.4668	3.65991	5.07153	6.50146	9.03125	12.4968
42.44	3.479	3.66138	5.07349	6.5105	9.03613	12.4946
42.54	3.47217	3.67163	5.07202	6.52222	9.04639	12.5151
42.64	3.48633	3.67529	5.08325	6.52588	9.05054	12.51
42.74	3.4917	3.67798	5.08521	6.52197	9.05762	12.5227
42.84	3.48779	3.66504	5.08325	6.52588	9.05103	12.5308
42.94	3.48267	3.66357	5.08496	6.52197	9.05664	12.5251
43.04	3.48853	3.66992	5.09229	6.52173	9.0481	12.5242
43.14	3.47998	3.66504	5.08447	6.52539	9.05615	12.5278
43.24	3.49146	3.66992	5.09131	6.52173	9.05859	12.5239
43.34	3.48755	3.67432	5.09351	6.52563	9.06787	12.5281
43.44	3.47974	3.67212	5.09351	6.52173	9.05811	12.5239
43.54	3.48755	3.67407	5.10132	6.52539	9.07153	12.5386
43.64	3.47974	3.67188	5.09351	6.52148	9.06421	12.5364
43.74	3.47559	3.68066	5.10107	6.53979	9.07617	12.5449
43.84	3.48901	3.68262	5.09985	6.53247	9.07642	12.5435
43.94	3.48755	3.68286	5.10034	6.55127	9.07593	12.5474
44.04	3.49146	3.67969	5.10522	6.54492	9.08105	12.5559
44.14	3.48828	3.68188	5.10205	6.55298	9.08643	12.554
44.24	3.49023	3.68262	5.11035	6.55298	9.07813	12.5559
44.34	3.48853	3.68286	5.11279	6.54663	9.08228	12.5542
44.44	3.47876	3.68262	5.12085	6.55127	9.08862	12.5664
44.54	3.47949	3.69849	5.11279	6.55298	9.09229	12.5728
44.64	3.48584	3.68652	5.12695	6.55273	9.0896	12.5679
44.74	3.48071	3.7063	5.11401	6.5647	9.104	12.5847
44.84	3.4978	3.70459	5.13013	6.5708	9.10864	12.5859
44.94	3.49902	3.70117	5.1333	6.57153	9.10669	12.5938
45.04	3.49902	3.70313	5.13135	6.56689	9.11377	12.5938
45.14	3.49878	3.70752	5.13306	6.56055	9.10645	12.603
45.24	3.49902	3.70459	5.13135	6.57227	9.11743	12.5962
45.34	3.49902	3.70117	5.1333	6.56079	9.11523	12.603
45.44	3.49023	3.70313	5.13135	6.56445	9.11353	12.6172
45.54	3.49976	3.71899	5.13306	6.5813	9.13159	12.6248
45.64	3.51563	3.70044	5.14917	6.57446	9.1145	12.6169
45.74	3.50122	3.71899	5.13354	6.5813	9.1355	12.6311
45.84	3.51587	3.72144	5.15015	6.59277	9.13501	12.6445
45.94	3.50757	3.71362	5.16333	6.58276	9.12354	12.6394
46.04	3.49756	3.72143	5.15161	6.59277	9.13769	12.6453
46.14	3.50757	3.70972	5.16357	6.59033	9.14282	12.6431
46.24	3.50537	3.72119	5.15942	6.59253	9.13428	12.645
46.34	3.51025	3.70825	5.16333	6.58911	9.1311	12.6418
46.44	3.50488	3.73193	5.16089	6.60596	9.1543	12.6636
46.54	3.50928	3.72192	5.1709	6.60376	9.15625	12.6672
46.64	3.51099	3.72388	5.1748	6.59424	9.146	12.6555
46.74	3.50122	3.73291	5.16309	6.604	9.15747	12.6675
46.84	3.50708	3.71997	5.1748	6.60083	9.15381	12.665
46.94	3.50781	3.72656	5.16309	6.59912	9.15601	12.6775
47.04	3.51147	3.71314	5.16553	6.6106	9.15332	12.6646
47.14	3.5083	3.72729	5.1604	6.61938	9.16211	12.6838
47.24	3.51758	3.71484	5.17163	6.61353	9.15576	12.6741
47.34	3.51001	3.72754	5.16187	6.62256	9.16357	12.6838
47.44	3.51782	3.74194	5.1709	6.63257	9.17114	12.6919
47.54	3.52783	3.74023	5.18091	6.62354	9.17383	12.7048
47.64	3.52808	3.74292	5.1814	6.62231	9.17578	12.707
47.74	3.51855	3.72876	5.18335	6.61939	9.17725	12.7021
47.84	3.52539	3.73267	5.17847	6.6333	9.17383	12.7061
47.94	3.52832	3.74194	5.18237	6.64038	9.19409	12.7151
48.04	3.52759	3.73755	5.19165	6.64185	9.19116	12.7227
48.14	3.53687	3.74341	5.19897	6.64453	9.18506	12.7244
48.24	3.52905	3.73755	5.19287	6.64258	9.18848	12.7227
48.34	3.52515	3.74951	5.19238	6.65088	9.20312	12.7305
48.44	3.5354	3.74316	5.20532	6.65356	9.1936	12.7283
48.54	3.52783	3.75317	5.19531	6.64404	9.1936	12.7458
48.64	3.53784	3.74316	5.2019	6.64453	9.19507	12.7361
48.74	3.52783	3.75293	5.19385	6.64233	9.20483	12.7456
48.84	3.54053	3.74023	5.20142	6.65088	9.19946	12.7422
48.94	3.53516	3.74805	5.19995	6.6582	9.21899	12.7549
49.04	3.54834	3.74024	5.20947	6.65234	9.20386	12.7542
49.14	3.53662	3.74023	5.20068	6.65332	9.20166	12.7471
49.24	3.53662	3.7583	5.20239	6.67139	9.20996	12.7681
49.34	3.54834	3.75073	5.21851	6.65454	9.20972	12.7576
49.44	3.5459	3.75391	5.21289	6.66724	9.22363	12.7817
49.54	3.55029	3.76099	5.21143	6.67261	9.22217	12.7834
49.64	3.55737	3.75928	5.22217	6.67163	9.229	12.7861
49.74	3.55981	3.76343	5.22046	6.67358	9.23511	12.7844
49.84	3.55981	3.75928	5.22437	6.67139	9.24023	12.7939
49.94	3.55957	3.76318	5.22046	6.6814	9.23193	12.7842
50.04	3.55957	3.75781	5.23242	6.67261	9.22876	12.7927
50.14	3.54663	3.771	5.22217	6.68017	9.24267	12.8027
50.24	3.55566	3.77002	5.24097	6.68311	9.2478	12.8027
50.34	3.55713	3.78125	5.23901	6.69043	9.2605	12.8118
50.44	3.56323	3.77319	5.25024	6.69214	9.26196	12.823
50.54	3.56982	3.78271	5.25195	6.69214	9.25635	12.8315
50.64	3.56494	3.77222	5.2583	6.68018	9.26245	12.8157
50.74	3.56714	3.77881	5.25073	6.69995	9.27051	12.8311
50.84	3.56714	3.78247	5.25415	6.69189	9.2644	12.8367
50.94	3.56714	3.77051	5.25171	6.69189	9.25049	12.8228
51.04	3.55933	3.77685	5.25146	6.68945	9.25879	12.8313
51.14	3.56177	3.77832	5.24902	6.70044	9.26758	12.8335
51.24	3.57471	3.77197	5.26025	6.68921	9.26904	12.8413
51.34	3.56299	3.7771	5.25806	6.69189	9.2688	12.8413
51.44	3.57471	3.77222	5.25391	6.69214	9.27026	12.8452
51.54	3.57007	3.77978	5.25171	6.70117	9.2688	12.8623
51.64	3.58496	3.77905	5.26074	6.69409	9.27881	12.8552
51.74	3.57837	3.79541	5.26001	6.70581	9.2854	12.8594
51.84	3.57471	3.80176	5.27637	6.71435	9.28003	12.8638
51.94	3.57861	3.79785	5.28174	6.70825	9.28003	12.8694
52.04	3.57471	3.80176	5.27979	6.7207	9.28638	12.8818
52.14	3.59277	3.81079	5.27881	6.72583	9.29053	12.887
52.24	3.60083	3.80029	5.29175	6.71997	9.29785	12.885
52.34	3.5979	3.80151	5.28101	6.71338	9.2915	12.8955
52.44	3.59863	3.79785	5.28247	6.71021	9.2876	12.8918
52.54	3.59692	3.81079	5.27856	6.72143	9.30054	12.9014
52.64	3.60449	3.79858	5.29199	6.71118	9.29761	12.8865
52.74	3.58838	3.82031	5.27319	6.72436	9.302	12.8918
52.84	3.59692	3.80151	5.28784	6.73047	9.29736	12.9009
52.94	3.59619	3.81812	5.28247	6.73315	9.31055	12.915
53.04	3.60571	3.80054	5.302	6.7229	9.29858	12.9033
53.14	3.59766	3.82104	5.28223	6.73071	9.29883	12.9229
53.24	3.60547	3.82764	5.30176	6.73999	9.30908	12.9333
53.34	3.61499	3.82251	5.30835	6.74219	9.30908	12.9336
53.44	3.61719	3.81543	5.3125	6.74219	9.30469	12.9133
53.54	3.59619	3.82056	5.29248	6.74194	9.31909	12.9211
53.64	3.61304	3.81689	5.30005	6.73926	9.30688	12.9304
53.74	3.60376	3.82104	5.29785	6.74121	9.30884	12.9304
53.84	3.6084	3.81714	5.29785	6.74707	9.30713	12.9307
53.94	3.60254	3.8208	5.29785	6.74976	9.31519	12.9397
54.04	3.60303	3.82983	5.30688	6.75269	9.32129	12.9539
54.14	3.61694	3.81934	5.31323	6.75	9.31738	12.9446
54.24	3.59595	3.83032	5.30029	6.76025	9.32519	12.9514
54.34	3.6145	3.82861	5.31885	6.75122	9.32788	12.9614
54.44	3.61597	3.84961	5.30933	6.76929	9.33911	12.9749
54.54	3.6272	3.84888	5.33032	6.77148	9.33667	12.9705
54.64	3.62451	3.83838	5.31958	6.76904	9.32568	12.9692
54.74	3.61914	3.8313	5.31787	6.76148	9.31958	12.9551
54.84	3.61426	3.83887	5.30835	6.77075	9.3269	12.9717
54.94	3.62085	3.83618	5.32251	6.76367	9.31665	12.9692
55.04	3.61377	3.83374	5.31787	6.76123	9.32593	12.9761
55.14	3.61597	3.8252	5.32227	6.76904	9.32813	12.9702
55.24	3.6167	3.8374	5.30908	6.77832	9.33423	12.99
55.34	3.6228	3.83887	5.32715	6.78076	9.33862	12.9861
55.44	3.6272	3.85815	5.33154	6.79004	9.34595	12.9912
55.54	3.63477	3.83984	5.33252	6.78149	9.33545	12.9924
55.64	3.61914	3.85303	5.3269	6.78198	9.35644	13.0044
55.74	3.62744	3.84058	5.33398	6.78052	9.33936	12.9924
55.84	3.61353	3.84888	5.31787	6.79077	9.34546	12.9924
55.94	3.62549	3.84473	5.32983	6.78833	9.34668	12.9924
56.04	3.61499	3.85034	5.32837	6.78589	9.34668	13.0039
56.14	3.61621	3.84741	5.33984	6.78662	9.35596	13.0095
56.24	3.62183	3.85132	5.32813	6.78833	9.36475	13.0208
56.34	3.63599	3.84741	5.34009	6.7915	9.35449	13.0137
56.44	3.63599	3.8606	5.32837	6.8103	9.37524	13.0212
56.54	3.63574	3.8562	5.34937	6.80762	9.36572	13.0205
56.64	3.63574	3.86816	5.33057	6.81128	9.37183	13.0288
56.74	3.64209	3.85254	5.34595	6.79981	9.36841	13.0249
56.84	3.63477	3.86768	5.33887	6.81152	9.38379	13.0286
56.94	3.64453	3.8645	5.34863	6.80005	9.38379	13.0291
57.04	3.64111	3.8706	5.34521	6.8208	9.38794	13.0369
57.14	3.64111	3.8667	5.35425	6.81006	9.37695	13.0376
57.24	3.63281	3.87061	5.34839	6.81152	9.37402	13.0337
57.34	3.63574	3.8728	5.35938	6.81372	9.39648	13.0483
57.44	3.64087	3.87183	5.34741	6.82227	9.39551	13.0508
57.54	3.64722	3.87988	5.35913	6.82959	9.40649	13.0627
57.64	3.64746	3.88721	5.36865	6.82178	9.40405	13.0627
57.74	3.64355	3.8811	5.36792	6.82202	9.40381	13.0625
57.84	3.64722	3.88696	5.36987	6.82788	9.40381	13.0706
57.94	3.65503	3.89502	5.37085	6.84009	9.41284	13.0742
58.04	3.65503	3.88355	5.37695	6.82471	9.40747	13.0625
58.14	3.64722	3.87549	5.37231	6.81641	9.40991	13.0706
58.24	3.64355	3.88745	5.35913	6.82837	9.40332	13.0706
58.34	3.65674	3.88574	5.3772	6.82666	9.40308	13.0703
58.44	3.6521	3.8894	5.37451	6.83057	9.41235	13.0701
58.54	3.64453	3.88965	5.37183	6.84253	9.42114	13.082
58.64	3.65649	3.89746	5.37695	6.83862	9.42261	13.082
58.74	3.6521	3.89746	5.37842	6.84229	9.41748	13.0754
58.84	3.65796	3.90674	5.37842	6.8479	9.42114	13.0884
58.94	3.65503	3.89966	5.39575	6.85254	9.42603	13.0938
59.04	3.66357	3.89722	5.39258	6.8501	9.43115	13.0896
59.14	3.65381	3.90674	5.38892	6.85962	9.44385	13.1016
59.24	3.6665	3.90918	5.40015	6.84741	9.43384	13.0938
59.34	3.65601	3.92724	5.38989	6.86743	9.45092	13.1108
59.44	3.67236	3.91968	5.4043	6.86328	9.44531	13.1069
59.54	3.65649	3.92163	5.3916	6.86182	9.44507	13.1025
59.64	3.65869	3.91699	5.40161	6.87598	9.43994	13.1108
59.74	3.66138	3.91675	5.39795	6.87207	9.44482	13.1218
59.84	3.6665	3.91675	5.39868	6.8689	9.45044	13.1106
59.94	3.6626	3.92603	5.39673	6.88013	9.45923	13.1226
60.04	3.66675	3.927	5.4082	6.86816	9.46045	13.1116
60.14	3.66284	3.91699	5.40552	6.88037	9.46338	13.1211
60.24	3.6604	3.91675	5.42041	6.8667	9.45337	13.1133
60.34	3.64429	3.92993	5.40649	6.8789	9.46167	13.113
60.44	3.66406	3.92847	5.40918	6.87109	9.46411	13.1208
60.54	3.65479	3.91895	5.40845	6.87354	9.46387	13.1206
60.64	3.65723	3.92578	5.40381	6.8877	9.47949	13.1301
60.74	3.66016	3.94019	5.40405	6.88281	9.47705	13.1445
60.84	3.66968	3.92847	5.42017	6.87329	9.46216	13.1233
60.94	3.65576	3.93994	5.4104	6.88745	9.48047	13.1418
61.04	3.66626	3.92529	5.42627	6.88916	9.47217	13.1414
61.14	3.65479	3.927	5.41162	6.88257	9.47021	13.1299
61.24	3.64429	3.92822	5.4082	6.88745	9.48145	13.1497
61.34	3.65332	3.93726	5.41577	6.88892	9.48291	13.1533
61.44	3.6665	3.93359	5.41187	6.88892	9.48901	13.1575
61.54	3.66895	3.95093	5.42627	6.90088	9.49341	13.1653
61.64	3.67725	3.93701	5.42871	6.89673	9.48901	13.1609
61.74	3.66479	3.93579	5.42871	6.89795	9.49951	13.1572
61.84	3.66382	3.93848	5.41675	6.90015	9.50171	13.1648
61.94	3.66626	3.93677	5.42065	6.89893	9.48999	13.1597
62.04	3.65698	3.94507	5.41699	6.90942	9.5	13.1699
62.14	3.66382	3.94604	5.42847	6.90527	9.4978	13.1792
62.24	3.67114	3.93579	5.42554	6.91113	9.49756	13.1731
62.34	3.6731	3.94482	5.42749	6.90039	9.49878	13.1699
62.44	3.66626	3.94971	5.42603	6.90503	9.50903	13.179
62.54	3.67114	3.94507	5.43726	6.90552	9.50757	13.1792
62.64	3.67163	3.94727	5.43628	6.91968	9.51172	13.1831
62.74	3.66748	3.95654	5.43896	6.92529	9.51904	13.2004
62.84	3.67261	3.95605	5.44653	6.92993	9.52051	13.1934
62.94	3.67383	3.95483	5.43848	6.92871	9.52808	13.2
63.04	3.66602	3.95752	5.43726	6.927	9.52148	13.2021
63.14	3.66479	3.95581	5.43579	6.93115	9.52637	13.1931
63.24	3.66284	3.96826	5.44775	6.93115	9.54102	13.2119
63.34	3.66602	3.9602	5.44775	6.93896	9.53931	13.2104
63.44	3.67651	3.94434	5.44775	6.92749	9.53174	13.1934
63.54	3.66309	3.9563	5.43604	6.93115	9.5376	13.2117
63.64	3.67529	3.96631	5.44897	6.92432	9.53906	13.2009
63.74	3.66431	3.96631	5.44995	6.93628	9.54517	13.2163
63.84	3.67212	3.9585	5.45361	6.94165	9.53003	13.2131
63.94	3.66479	3.96411	5.45044	6.94531	9.5481	13.2166
64.04	3.66821	3.9751	5.44751	6.94116	9.53955	13.2205
64.14	3.67358	3.96777	5.45605	6.93799	9.54419	13.2209
64.24	3.67529	3.97583	5.45825	6.95703	9.56763	13.2219
64.34	3.67529	3.9729	5.45947	6.95288	9.55273	13.2336
64.44	3.68628	3.97266	5.45654	6.95581	9.56567	13.2361
64.54	3.6814	3.9773	5.4646	6.94043	9.55811	13.2234
64.64	3.67651	3.98438	5.45825	6.94897	9.56714	13.2429
64.74	3.67749	3.98584	5.47705	6.95825	9.56958	13.2385
64.84	3.67456	3.97974	5.46948	6.9585	9.56958	13.2522
64.94	3.67676	3.98755	5.47021	6.96753	9.57886	13.2532
65.04	3.6853	3.99853	5.48511	6.96069	9.57813	13.2617
65.14	3.67456	3.97656	5.4812	6.9585	9.56934	13.2493
65.24	3.67358	3.97705	5.46704	6.95825	9.56519	13.2429
65.34	3.67236	3.98437	5.46045	6.95825	9.57861	13.2478
65.44	3.67749	3.98047	5.46558	6.96216	9.57788	13.2607
65.54	3.67456	3.9834	5.47876	6.9646	9.58227	13.2607
65.64	3.67358	3.9978	5.4812	6.98071	9.59155	13.2639
65.74	3.67651	3.99365	5.48047	6.96851	9.58569	13.2695
65.84	3.68213	3.99731	5.47485	6.97632	9.59766	13.2686
65.94	3.68262	3.98853	5.49561	6.96899	9.58813	13.2637
66.04	3.67847	3.99463	5.48364	6.96851	9.58813	13.2695
66.14	3.67041	3.99756	5.47559	6.97632	9.59448	13.2686
66.24	3.68286	3.99731	5.48804	6.97754	9.59985	13.2803
66.34	3.67578	4.00366	5.4873	6.97778	9.60522	13.2866
66.44	3.67993	3.99634	5.49414	6.96899	9.5957	13.2793
66.54	3.67236	3.98779	5.48535	6.97852	9.59937	13.2827
66.64	3.68481	3.99194	5.48071	6.97363	9.60205	13.2896
66.74	3.69141	3.98462	5.48096	6.96875	9.59839	13.292
66.84	3.67456	3.9895	5.47729	6.96973	9.60571	13.292
66.94	3.68262	3.99414	5.49658	6.9668	9.60693	13.2996
67.04	3.68188	3.99634	5.4939	6.98047	9.60718	13.3037
67.14	3.6748	3.99854	5.49146	6.97607	9.60449	13.2917
67.24	3.6748	4.00586	5.48755	6.98901	9.61865	13.3113
67.34	3.67554	3.99731	5.50635	6.9773	9.61304	13.2998
67.44	3.67969	4	5.4978	6.99194	9.62134	13.3035
67.54	3.68774	4.00586	5.50073	6.99023	9.61548	13.3113
67.64	3.68188	3.99292	5.50659	6.97729	9.61597	13.2996
67.74	3.68237	3.99707	5.49512	6.97754	9.61548	13.3083
67.84	3.67578	3.99927	5.50024	6.98364	9.62353	13.3166
67.94	3.67847	3.99829	5.5	6.99951	9.61938	13.3127
68.04	3.67847	4.0061	5.5083	6.98096	9.62158	13.3203
68.14	3.68311	4.00171	5.50928	6.98584	9.61646	13.3198
68.24	3.68066	3.99854	5.50537	6.98804	9.62329	13.3125
68.34	3.67847	4.0022	5.50952	6.99683	9.62549	13.3281
68.44	3.6792	4.00854	5.50537	6.9978	9.62549	13.3276
68.54	3.69263	4.00293	5.50928	6.99439	9.62402	13.3188
68.64	3.68481	4.00977	5.51538	6.99414	9.62817	13.3335
68.74	3.68457	4.00464	5.5105	6.98877	9.62622	13.3213
68.84	3.68481	4.0083	5.50537	7.00683	9.63428	13.3291
68.94	3.68481	4.00269	5.51538	6.99658	9.63403	13.3396
69.04	3.69385	4.01514	5.5166	6.99951	9.63672	13.3381
69.14	3.69238	4.01074	5.51587	7.00952	9.63672	13.3501
69.24	3.68726	4.01074	5.51147	7.00439	9.64282	13.3501
69.34	3.69019	4.01611	5.51147	7.00806	9.64404	13.3499
69.44	3.69336	4.00708	5.52466	6.98975	9.63623	13.3496
69.54	3.67432	4.01465	5.51953	7.00659	9.64551	13.3538
69.64	3.69385	4.00659	5.52075	7.00806	9.64087	13.3496
69.74	3.68677	4.02515	5.51367	7.00806	9.65308	13.3613
69.84	3.68433	4.03027	5.52588	7.01074	9.66089	13.364
69.94	3.68701	4.01733	5.54248	7.00708	9.65552	13.3606
70.04	3.68359	4.01587	5.52588	7.01025	9.65552	13.3701
70.14	3.67505	4.0083	5.52832	7.00562	9.65405	13.3577
70.24	3.6792	4.01587	5.5166	7.01953	9.66602	13.3721
70.34	3.69507	4.0249	5.53613	7.02881	9.66528	13.3823
70.44	3.68408	4.01831	5.53735	7.01807	9.66309	13.3716
70.54	3.69214	4.02197	5.52661	7.02588	9.66919	13.3872
70.64	3.69067	4.02368	5.53442	7.02734	9.67456	13.3926
70.74	3.7041	4.01733	5.53613	7.02856	9.67334	13.4004
70.84	3.70386	4.01343	5.54663	7.02588	9.6731	13.3887
70.94	3.69214	4.02588	5.54248	7.03662	9.67432	13.4016
71.04	3.70117	4.02563	5.54761	7.02563	9.67432	13.4026
71.14	3.69434	4.02637	5.54346	7.03027	9.67432	13.4004
71.24	3.69189	4.03369	5.54126	7.04517	9.67163	13.408
71.34	3.70117	4.02588	5.55396	7.04663	9.68311	13.4082
71.44	3.69458	4.03296	5.55542	7.03906	9.67944	13.4067
71.54	3.69849	4.02344	5.54761	7.04663	9.68481	13.4189
71.64	3.69336	4.03516	5.5437	7.05591	9.69189	13.4197
71.74	3.70117	4.02319	5.56445	7.04126	9.6853	13.4116
71.84	3.6958	4.0415	5.5498	7.05298	9.6997	13.4377
71.94	3.70996	4.03394	5.56445	7.05713	9.68677	13.4211
72.04	3.69336	4.03735	5.55518	7.05298	9.6853	13.4316
72.14	3.6958	4.04419	5.5498	7.05273	9.69678	13.4377
72.24	3.70337	4.0437	5.56445	7.06616	9.69556	13.4302
72.34	3.70068	4.02857	5.56396	7.0481	9.69043	13.4304
72.44	3.69482	4.03247	5.55786	7.05566	9.69263	13.4272
72.54	3.69824	4.03735	5.55493	7.05518	9.69263	13.4285
72.64	3.69434	4.04102	5.56396	7.06567	9.70288	13.4485
72.74	3.70093	4.04541	5.56665	7.06885	9.70361	13.4407
72.84	3.70239	4.05273	5.56592	7.07617	9.7146	13.4573
72.94	3.70728	4.05444	5.573	7.0686	9.71216	13.4495
73.04	3.70068	4.0542	5.57471	7.06348	9.70654	13.4446
73.14	3.70093	4.05713	5.57446	7.07764	9.71484	13.4521
73.24	3.70874	4.05518	5.57739	7.06445	9.70898	13.4587
73.34	3.70044	4.05395	5.57568	7.07519	9.72095	13.469
73.44	3.70313	4.06494	5.58618	7.08545	9.72241	13.4602
73.54	3.70215	4.06445	5.58521	7.09497	9.73388	13.4797
73.64	3.71362	4.06592	5.59668	7.08032	9.71411	13.4714
73.74	3.70337	4.06592	5.5769	7.07764	9.73267	13.4702
73.84	3.70313	4.06299	5.59546	7.08545	9.72046	13.4783
73.94	3.70044	4.0647	5.58887	7.08936	9.73389	13.4719
74.04	3.71387	4.06592	5.58618	7.08545	9.7373	13.4768
74.14	3.71118	4.07446	5.5918	7.08936	9.74268	13.49
74.24	3.71484	4.0791	5.58862	7.08569	9.74829	13.4861
74.34	3.71753	4.07886	5.60059	7.09717	9.75439	13.4927
74.44	3.72583	4.07373	5.60474	7.09326	9.74121	13.4988
74.54	3.71362	4.08374	5.59668	7.09717	9.75171	13.4978
74.64	3.72144	4.06689	5.60352	7.09692	9.74219	13.5005
74.74	3.71387	4.07739	5.60571	7.09717	9.74243	13.5027
74.84	3.71729	4.07178	5.60059	7.09717	9.74878	13.4976
74.94	3.71729	4.07593	5.60327	7.09717	9.75024	13.5093
75.04	3.71338	4.07861	5.60034	7.11133	9.75	13.5093
75.14	3.71631	4.08521	5.60034	7.11035	9.75	13.5093
75.24	3.72412	4.08252	5.60718	7.1062	9.75146	13.5186
75.34	3.72119	4.08325	5.60327	7.11353	9.74976	13.5078
75.44	3.71851	4.07324	5.59619	7.11011	9.75366	13.5095
75.54	3.71606	4.09424	5.60571	7.11792	9.76269	13.5303
75.64	3.72388	4.0835	5.61475	7.10742	9.75854	13.5195
75.74	3.71973	4.08252	5.60791	7.10327	9.74951	13.5264
75.84	3.71069	4.08496	5.60303	7.11963	9.75268	13.5327
75.94	3.71387	4.09399	5.60962	7.11646	9.75977	13.5405
76.04	3.72095	4.0874	5.60547	7.11743	9.76123	13.5408
76.14	3.73413	4.08472	5.61743	7.11938	9.76099	13.5342
76.24	3.71606	4.10571	5.60547	7.12817	9.77002	13.5508
76.34	3.73267	4.0874	5.62622	7.12061	9.77271	13.5313
76.44	3.72266	4.09106	5.60791	7.11646	9.76709	13.5457
76.54	3.72241	4.09277	5.61938	7.12549	9.771	13.5454
76.64	3.72241	4.08081	5.625	7.12183	9.75806	13.5442
76.74	3.72876	4.08765	5.61328	7.12183	9.77246	13.5513
76.84	3.72388	4.10278	5.625	7.13452	9.77759	13.5483
76.94	3.73169	4.09497	5.63428	7.13574	9.78101	13.5569
77.04	3.7312	4.09521	5.6272	7.12939	9.77856	13.5588
77.14	3.72363	4.10278	5.63525	7.13452	9.78125	13.5715
77.24	3.73169	4.09473	5.64673	7.12646	9.78052	13.5596
77.34	3.72461	4.10156	5.6272	7.13354	9.77734	13.574
77.44	3.71704	4.09766	5.64185	7.12939	9.79126	13.5728
77.54	3.73291	4.10254	5.64429	7.14184	9.79639	13.5767
77.64	3.73389	4.104	5.64404	7.14746	9.7998	13.5818
77.74	3.7312	4.104	5.65576	7.14746	9.80811	13.5894
77.84	3.73926	4.104	5.65576	7.1582	9.8042	13.5901
77.94	3.7356	4.11353	5.65576	7.15405	9.80664	13.5911
78.04	3.73169	4.10644	5.65356	7.1499	9.80493	13.5881
78.14	3.72852	4.11304	5.65845	7.16455	9.81421	13.604
78.24	3.72852	4.11255	5.66211	7.15747	9.80884	13.6011
78.34	3.73242	4.10547	5.66357	7.15527	9.80933	13.5979
78.44	3.73291	4.11328	5.66504	7.17627	9.81665	13.6169
78.54	3.74048	4.12451	5.67676	7.16943	9.82178	13.613
78.64	3.73242	4.11963	5.67627	7.18115	9.83618	13.6277
78.74	3.73926	4.12622	5.67139	7.18945	9.84033	13.6238
78.84	3.73535	4.11426	5.67822	7.17725	9.83838	13.6272
78.94	3.73096	4.11035	5.67798	7.17603	9.83496	13.6184
79.04	3.72754	4.11475	5.66992	7.18384	9.83472	13.6211
79.14	3.73511	4.12329	5.67798	7.18481	9.83862	13.6299
79.24	3.73999	4.12427	5.68677	7.177	9.83813	13.6311
79.34	3.74146	4.11914	5.68408	7.18237	9.83692	13.6377
79.44	3.73193	4.12329	5.68286	7.19263	9.84326	13.6379
79.54	3.73901	4.11475	5.68311	7.18555	9.84009	13.6379
79.64	3.72974	4.13354	5.68628	7.198	9.84717	13.6379
79.74	3.73364	4.12183	5.69336	7.19482	9.84863	13.6377
79.84	3.72974	4.13232	5.6853	7.20312	9.84839	13.6494
79.94	3.73975	4.12451	5.70386	7.20728	9.84741	13.6487
80.04	3.74023	4.1333	5.70239	7.21606	9.8584	13.6675
80.14	3.75293	4.12329	5.7063	7.20581	9.86011	13.6521
80.24	3.74219	4.14917	5.68555	7.22559	9.87451	13.6667
80.34	3.75854	4.13648	5.71191	7.21655	9.87085	13.6628
80.44	3.74683	4.13086	5.7063	7.20801	9.8584	13.6582
80.54	3.74121	4.14404	5.69312	7.22388	9.8833	13.6692
80.64	3.7478	4.14648	5.71167	7.23462	9.89111	13.6782
80.74	3.75293	4.14258	5.72437	7.23047	9.88696	13.6821
80.84	3.75171	4.14648	5.71558	7.22632	9.89111	13.678
80.94	3.76172	4.14624	5.71436	7.2251	9.88843	13.6863
81.04	3.75293	4.1394	5.71558	7.22534	9.88403	13.6794
81.14	3.74902	4.14551	5.71655	7.21899	9.88062	13.689
81.24	3.74683	4.14233	5.71436	7.23169	9.88452	13.6848
81.34	3.74756	4.15259	5.72363	7.24634	9.89697	13.6978
81.44	3.75806	4.15405	5.73755	7.22778	9.88647	13.6909
81.54	3.74341	4.1477	5.7229	7.23706	9.89185	13.6917
81.64	3.74121	4.14868	5.72754	7.24243	9.90601	13.7065
81.74	3.75024	4.15405	5.73511	7.2395	9.90088	13.7029
81.84	3.75537	4.15918	5.72827	7.25391	9.90454	13.6965
81.94	3.75806	4.16187	5.73999	7.23853	9.89722	13.6995
82.04	3.75293	4.15649	5.73657	7.23779	9.89795	13.6948
82.14	3.74341	4.15918	5.72827	7.24463	9.90405	13.7065
82.24	3.75806	4.17188	5.72192	7.25391	9.91479	13.7173
82.34	3.77075	4.16284	5.73975	7.24976	9.92505	13.7092
82.44	3.76172	4.17334	5.74414	7.25732	9.92896	13.7168
82.54	3.76025	4.16528	5.73584	7.24439	9.91699	13.717
82.64	3.75879	4.16235	5.74243	7.24829	9.91797	13.7222
82.74	3.75122	4.16675	5.74609	7.25073	9.92236	13.7156
82.84	3.75781	4.16699	5.74097	7.25781	9.92773	13.7227
82.94	3.76587	4.16772	5.75586	7.26172	9.93506	13.7378
83.04	3.76685	4.18237	5.75684	7.26782	9.94555	13.7393
83.14	3.78125	4.17529	5.76294	7.2561	9.93701	13.739
83.24	3.7627	4.17847	5.75244	7.27026	9.93213	13.7454
83.34	3.76978	4.17822	5.75269	7.26929	9.94678	13.7522
83.44	3.77197	4.17139	5.76416	7.26538	9.93457	13.7483
83.54	3.77197	4.18066	5.76196	7.27271	9.94385	13.7493
83.64	3.75854	4.18481	5.75513	7.27588	9.94775	13.7573
83.74	3.76953	4.18481	5.77368	7.27856	9.95679	13.7522
83.84	3.76563	4.18994	5.77612	7.28711	9.95532	13.7678
83.94	3.77808	4.17505	5.77588	7.27246	9.94727	13.749
84.04	3.77173	4.1792	5.76392	7.27563	9.95361	13.7571
84.14	3.77173	4.17114	5.78223	7.27539	9.94702	13.7583
84.24	3.75464	4.17798	5.76636	7.27148	9.94946	13.7544
84.34	3.75439	4.18359	5.76929	7.27563	9.96582	13.769
84.44	3.75903	4.18457	5.7771	7.29272	9.95508	13.7766
84.54	3.76953	4.18164	5.77832	7.28589	9.96362	13.7688
84.64	3.77441	4.18042	5.78345	7.28467	9.96387	13.7754
84.74	3.76636	4.18335	5.77148	7.28687	9.96606	13.7754
84.84	3.77466	4.19043	5.77539	7.29468	9.97143	13.7761
84.94	3.77148	4.17114	5.79248	7.27783	9.96631	13.7686
85.04	3.76074	4.18188	5.77393	7.28442	9.97241	13.7751
85.14	3.75977	4.18042	5.78467	7.30127	9.97388	13.7778
85.24	3.77686	4.19214	5.78955	7.29639	9.97656	13.7896
85.34	3.77686	4.18433	5.80542	7.28711	9.96704	13.7778
85.44	3.76099	4.18018	5.78955	7.29468	9.97119	13.7856
85.54	3.7561	4.19043	5.78931	7.30102	9.99145	13.7957
85.64	3.76904	4.18188	5.80005	7.30542	9.99219	13.7986
85.74	3.77295	4.1897	5.79639	7.3064	9.99683	13.8064
85.84	3.77783	4.1919	5.81274	7.30347	9.98511	13.7917
85.94	3.77124	4.1958	5.80249	7.31567	9.99536	13.8105
86.04	3.77148	4.18896	5.81421	7.30493	9.99268	13.8059
86.14	3.7793	4.17993	5.81104	7.30249	9.99878	13.8047
86.24	3.75952	4.19092	5.80762	7.31714	10.0034	13.8196
86.34	3.7793	4.19043	5.81567	7.3125	10.0029	13.8086
86.44	3.77124	4.19189	5.82324	7.32593	10.0137	13.8269
86.54	3.78052	4.19971	5.83228	7.32202	10.0144	13.8242
86.64	3.77612	4.19702	5.82056	7.31934	10.0039	13.8218
86.74	3.77271	4.18994	5.82471	7.32422	10.0132	13.8267
86.84	3.7688	4.18774	5.82544	7.32202	10.0042	13.8149
86.94	3.76978	4.19165	5.8186	7.32568	10.022	13.8257
87.04	3.77759	4.20996	5.83081	7.3374	10.0327	13.8491
87.14	3.78833	4.20093	5.84521	7.3335	10.0286	13.8411
87.24	3.78442	4.20117	5.84106	7.33496	10.022	13.8462
87.34	3.77759	4.20337	5.84277	7.32812	10.0271	13.8423
87.44	3.79077	4.20313	5.83569	7.3335	10.0295	13.845
87.54	3.78687	4.20312	5.84106	7.33618	10.0337	13.8591
87.64	3.79346	4.21997	5.84766	7.34351	10.0347	13.8589
87.74	3.79053	4.21338	5.85107	7.34741	10.0435	13.8591
87.84	3.7915	4.20972	5.85278	7.34277	10.04	13.8474
87.94	3.79077	4.20166	5.84497	7.34595	10.0461	13.8484
88.04	3.79053	4.20825	5.85376	7.35278	10.0486	13.8643
88.14	3.79053	4.21631	5.85791	7.35571	10.0479	13.8606
88.24	3.79077	4.21704	5.85791	7.3645	10.0515	13.8733
88.34	3.80005	4.21069	5.85889	7.34204	10.0391	13.8667
88.44	3.78125	4.21094	5.85107	7.36206	10.0515	13.8669
88.54	3.79688	4.21997	5.86182	7.3645	10.0498	13.8838
88.64	3.79443	4.22266	5.86035	7.3645	10.054	13.884
88.74	3.80127	4.21313	5.86426	7.35522	10.042	13.8794
88.84	3.78125	4.21582	5.85254	7.35791	10.051	13.8745
88.94	3.78809	4.22876	5.86011	7.3645	10.0598	13.884
89.04	3.79712	4.21192	5.86963	7.36743	10.0471	13.8784
89.14	3.79199	4.21436	5.86426	7.36523	10.0454	13.8809
89.24	3.78516	4.22217	5.85474	7.36426	10.0479	13.8835
89.34	3.78784	4.21924	5.86914	7.37598	10.0439	13.8806
89.44	3.7915	4.22729	5.8728	7.37183	10.0466	13.8923
89.54	3.78638	4.21167	5.86768	7.36401	10.0413	13.8757
89.64	3.77759	4.22827	5.86279	7.36426	10.0623	13.8953
89.74	3.78247	4.23901	5.86401	7.3811	10.0671	13.8977
89.84	3.79663	4.2207	5.87817	7.3667	10.0608	13.8833
89.94	3.77734	4.22119	5.86792	7.36426	10.0544	13.8967
90.04	3.78149	4.22827	5.86548	7.38135	10.062	13.8977
90.14	3.77856	4.24146	5.87793	7.38354	10.0706	13.9067
90.24	3.79639	4.22974	5.88843	7.37305	10.0603	13.8945
90.34	3.78101	4.23974	5.87402	7.3811	10.0706	13.9053
90.44	3.7876	4.2373	5.88086	7.39136	10.0798	13.905
90.54	3.78613	4.23242	5.89111	7.3772	10.071	13.8965
90.64	3.78149	4.2334	5.8833	7.38501	10.0823	13.9092
90.74	3.78882	4.23071	5.8833	7.38477	10.072	13.8984
90.84	3.77319	4.22583	5.87549	7.37183	10.0718	13.9028
90.94	3.78784	4.23242	5.87134	7.3772	10.0718	13.9104
91.04	3.78394	4.22192	5.87134	7.37329	10.0693	13.9077
91.14	3.78882	4.22656	5.8728	7.36646	10.0718	13.905
91.24	3.78076	4.23853	5.87378	7.38184	10.0715	13.9167
91.34	3.7876	4.24096	5.87769	7.3833	10.0815	13.9299
91.44	3.7937	4.24902	5.88281	7.38354	10.0793	13.9255
91.54	3.78076	4.24121	5.89087	7.37158	10.0713	13.9246
91.64	3.77295	4.24097	5.87891	7.3833	10.0713	13.9272
91.74	3.78125	4.24902	5.89331	7.39258	10.0806	13.9282
91.84	3.79004	4.26196	5.88916	7.39502	10.0894	13.9346
91.94	3.79004	4.24341	5.90234	7.39502	10.0908	13.927
92.04	3.7793	4.24341	5.89453	7.39502	10.0869	13.9336
92.14	3.78369	4.25171	5.89697	7.39502	10.0935	13.9297
92.24	3.79126	4.2605	5.90356	7.40039	10.0967	13.9343
92.34	3.79907	4.25781	5.90747	7.40527	10.1023	13.936
92.44	3.79248	4.24878	5.90454	7.40112	10.0967	13.9358
92.54	3.78857	4.27002	5.9082	7.40283	10.1099	13.9421
92.64	3.79004	4.26196	5.91919	7.40552	10.1128	13.9465
92.74	3.80078	4.27393	5.91528	7.41846	10.1138	13.9595
92.84	3.80176	4.26929	5.92041	7.41162	10.1108	13.9553
92.94	3.79883	4.26855	5.92944	7.41064	10.1074	13.9541
93.04	3.78638	4.26611	5.92188	7.41748	10.1099	13.949
93.14	3.79297	4.27002	5.92456	7.41431	10.1189	13.9646
93.24	3.79004	4.26294	5.93311	7.4231	10.1238	13.9614
93.34	3.79858	4.2666	5.93018	7.43115	10.1265	13.9614
93.44	3.79761	4.27075	5.93848	7.42456	10.1299	13.9749
93.54	3.79761	4.26563	5.93188	7.4314	10.1265	13.9668
93.64	3.79761	4.26587	5.92773	7.43408	10.1406	13.9788
93.74	3.80078	4.26685	5.93481	7.43384	10.1406	13.9839
93.84	3.80786	4.26831	5.93848	7.43384	10.1289	13.9771
93.94	3.78833	4.27197	5.9314	7.43359	10.1287	13.9807
94.04	3.79907	4.26807	5.93921	7.43994	10.135	13.9824
94.14	3.80933	4.26807	5.94604	7.44678	10.1392	13.9854
94.24	3.80908	4.26953	5.95386	7.44312	10.1389	13.9863
94.34	3.80151	4.27051	5.95117	7.43604	10.1365	13.9861
94.44	3.79736	4.27759	5.93945	7.4519	10.1482	13.9927
94.54	3.80933	4.27759	5.94629	7.44702	10.1431	13.9995
94.64	3.81323	4.26904	5.9541	7.45337	10.1487	13.9978
94.74	3.80933	4.26807	5.95239	7.44141	10.1399	13.9861
94.84	3.79736	4.28125	5.94678	7.4519	10.1492	14.0044
94.94	3.80127	4.27661	5.95239	7.44922	10.1448	14.0056
95.04	3.80615	4.28735	5.95996	7.45312	10.157	14.0173
95.14	3.81421	4.28247	5.95996	7.44678	10.1594	14.0056
95.24	3.80273	4.2915	5.95386	7.46265	10.1594	14.0347
95.34	3.8186	4.27686	5.9707	7.46216	10.1592	14.0159
95.44	3.81812	4.27563	5.96021	7.46094	10.1646	14.0134
95.54	3.81689	4.29028	5.96802	7.45459	10.1709	14.0281
95.64	3.81055	4.27954	5.97168	7.46265	10.1592	14.0237
95.74	3.81836	4.28027	5.96948	7.45947	10.1631	14.0276
95.84	3.82178	4.28491	5.97412	7.45972	10.1655	14.0344
95.94	3.81689	4.29907	5.97729	7.47266	10.1785	14.0369
96.04	3.82617	4.30225	5.98364	7.47192	10.1775	14.0447
96.14	3.82251	4.28833	5.99146	7.45557	10.1677	14.0276
96.24	3.81152	4.29932	5.97046	7.47144	10.1763	14.0344
96.34	3.81567	4.302	5.98926	7.47192	10.1721	14.0383
96.44	3.82007	4.30273	5.98511	7.48462	10.177	14.0432
96.54	3.8208	4.28809	5.98975	7.46729	10.1782	14.0366
96.64	3.81787	4.3042	5.98193	7.48218	10.1665	14.033
96.74	3.81714	4.30127	5.98901	7.4751	10.1782	14.0415
96.84	3.81689	4.29883	5.98218	7.49072	10.1846	14.0444
96.94	3.82837	4.30688	5.99756	7.48584	10.189	14.0552
97.04	3.81836	4.30835	5.99829	7.48218	10.1782	14.0447
97.14	3.8186	4.30151	5.99146	7.48706	10.179	14.0486
97.24	3.82983	4.30029	5.99365	7.48315	10.1873	14.0547
97.34	3.81689	4.3103	5.98584	7.47412	10.1792	14.0459
97.44	3.81982	4.31055	5.99023	7.4939	10.1882	14.0579
97.54	3.83276	4.31836	5.99146	7.48315	10.1858	14.0586
97.64	3.81934	4.3186	5.99927	7.49097	10.1975	14.0627
97.74	3.82739	4.32861	6.00317	7.50391	10.2078	14.0757
97.84	3.83789	4.32007	6.00928	7.50317	10.2083	14.075
97.94	3.84204	4.31055	6.01245	7.49463	10.1973	14.0586
98.04	3.82983	4.32226	6.00293	7.50268	10.2075	14.0745
98.14	3.8291	4.32471	6.00952	7.50024	10.2051	14.0813
98.24	3.84595	4.32886	6.00708	7.50317	10.2002	14.0696
98.34	3.83032	4.32446	6.0022	7.49854	10.2034	14.0703
98.44	3.82324	4.32471	6.00537	7.50415	10.2034	14.0706
98.54	3.82642	4.32861	5.99927	7.50415	10.2087	14.0742
98.64	3.82324	4.32764	6	7.5105	10.197	14.0735
98.74	3.82739	4.31982	6.00854	7.50146	10.2048	14.0654
98.84	3.8186	4.33935	6.00049	7.51343	10.2183	14.0852
98.94	3.83057	4.32715	6.01733	7.50659	10.2087	14.0706
99.04	3.81177	4.33765	6.00171	7.5105	10.2151	14.0745
99.14	3.82739	4.34692	6.00854	7.51172	10.2163	14.0835
99.24	3.82861	4.33154	6.01074	7.51489	10.2192	14.075
99.34	3.82007	4.33105	6.01392	7.50635	10.2173	14.0781
99.44	3.82324	4.33765	6.00537	7.51147	10.2163	14.0818
99.54	3.82324	4.34082	6.01709	7.51562	10.2192	14.0889
99.64	3.83179	4.33374	6.01221	7.51318	10.22	14.0847
99.74	3.83252	4.32666	6.01221	7.51392	10.2168	14.0779
99.84	3.81934	4.3374	6.01294	7.52173	10.2251	14.0935
99.94	3.8269	4.32959	6.01685	7.50244	10.2185	14.0742
100.04	3.81934	4.32568	6.00146	7.51709	10.2185	14.0886
100.14	3.82202	4.33765	6.01611	7.51318	10.2268	14.0889
100.24	3.82227	4.33765	6.01221	7.5249	10.2368	14.0964
100.34	3.83008	4.33911	6.02856	7.53394	10.2317	14.1055
100.44	3.83911	4.34009	6.02246	7.52197	10.2363	14.0935
100.54	3.82715	4.34033	6.01831	7.51685	10.2383	14.1057
100.64	3.83154	4.33984	6.02368	7.52466	10.2378	14.0989
100.74	3.83252	4.3374	6.01978	7.52344	10.2354	14.113
100.84	3.83496	4.34912	6.02881	7.52588	10.2468	14.1052
100.94	3.83081	4.34131	6.03247	7.52954	10.2388	14.1042
101.04	3.83765	4.3313	6.01831	7.53418	10.2351	14.1082
101.14	3.82983	4.34766	6.02124	7.53491	10.2444	14.1245
101.24	3.83228	4.33765	6.04028	7.52588	10.2375	14.1052
101.34	3.81787	4.34131	6.02075	7.53345	10.2454	14.1157
101.44	3.83789	4.34912	6.03931	7.5459	10.2458	14.1199
101.54	3.83398	4.34912	6.0354	7.54687	10.2505	14.1248
101.64	3.83252	4.34912	6.052	7.55469	10.2583	14.134
101.74	3.8374	4.34912	6.04028	7.54272	10.2527	14.126
101.84	3.83374	4.3584	6.04712	7.55322	10.2676	14.1262
101.94	3.84009	4.35156	6.05347	7.55298	10.2568	14.1338
102.04	3.83618	4.35523	6.04639	7.5481	10.2605	14.1282
102.14	3.82837	4.35059	6.04541	7.55591	10.2688	14.1274
102.24	3.84009	4.35815	6.04858	7.56079	10.2659	14.1431
102.34	3.83618	4.35791	6.04932	7.56494	10.2629	14.1365
102.44	3.8479	4.35693	6.06128	7.56006	10.2634	14.1401
102.54	3.84009	4.35986	6.04956	7.56763	10.271	14.1392
102.64	3.8335	4.35278	6.05347	7.5647	10.2671	14.1467
102.74	3.83057	4.34595	6.05322	7.55298	10.2666	14.136
102.84	3.82813	4.33716	6.04956	7.55981	10.2537	14.1399
102.94	3.82813	4.35791	6.04785	7.56201	10.2747	14.1545
103.04	3.83447	4.35034	6.04907	7.56226	10.2654	14.1467
103.14	3.83911	4.35522	6.05078	7.56226	10.2654	14.1516
103.24	3.83984	4.36084	6.05054	7.57422	10.2656	14.1479
103.34	3.84009	4.35669	6.04395	7.57031	10.2717	14.1626
103.44	3.83984	4.35034	6.05566	7.56519	10.2642	14.1467
103.54	3.8396	4.36206	6.03906	7.57812	10.2771	14.1665
103.64	3.83984	4.35767	6.05078	7.57129	10.2739	14.1619
103.74	3.83984	4.36816	6.04004	7.58179	10.2822	14.1648
103.84	3.85791	4.36572	6.05542	7.58325	10.2847	14.1646
103.94	3.84741	4.36279	6.05835	7.57617	10.2883	14.1646
104.04	3.83813	4.37451	6.05127	7.58813	10.2908	14.1726
104.14	3.84497	4.35791	6.06616	7.57544	10.2781	14.1724
104.24	3.84106	4.3772	6.05444	7.57397	10.2856	14.1763
104.34	3.84595	4.37207	6.05933	7.58325	10.283	14.1741
104.44	3.84888	4.36499	6.06079	7.57251	10.2749	14.1748
104.54	3.84985	4.36816	6.05688	7.57422	10.2937	14.1829
104.64	3.854	4.36548	6.06079	7.58032	10.2842	14.1724
104.74	3.84766	4.36938	6.06689	7.58325	10.2842	14.1831
104.84	3.84644	4.37427	6.05811	7.59082	10.2935	14.1841
104.94	3.85913	4.36816	6.06958	7.57642	10.293	14.1843
105.04	3.85132	4.37964	6.06299	7.5918	10.2957	14.1946
105.14	3.85132	4.38501	6.06689	7.58936	10.301	14.2036
105.24	3.85889	4.37329	6.07617	7.59253	10.2974	14.1855
105.34	3.84741	4.37817	6.07129	7.59765	10.3091	14.1975
105.44	3.85156	4.37817	6.07251	7.58447	10.3047	14.1985
105.54	3.85938	4.37695	6.08032	7.59106	10.301	14.1904
105.64	3.84741	4.37012	6.07861	7.58813	10.2979	14.1943
105.74	3.84839	4.38184	6.07056	7.59961	10.3032	14.209
105.84	3.85498	4.38086	6.07349	7.59473	10.303	14.209
105.94	3.85791	4.37695	6.07349	7.60254	10.3125	14.1958
106.04	3.85132	4.37524	6.07861	7.60107	10.3213	14.21
106.14	3.85352	4.3645	6.07593	7.58374	10.3015	14.2034
106.24	3.8457	4.37842	6.06812	7.59326	10.3062	14.209
106.34	3.85034	4.36743	6.07373	7.58154	10.2952	14.1956
106.44	3.8396	4.38062	6.0603	7.60254	10.3159	14.2136
106.54	3.85742	4.38184	6.07837	7.5957	10.3118	14.2114
106.64	3.84595	4.37402	6.07983	7.58765	10.303	14.2036
106.74	3.84497	4.37915	6.06812	7.60083	10.3237	14.2151
106.84	3.84717	4.38989	6.07837	7.60376	10.3223	14.2141
106.94	3.84863	4.38525	6.06958	7.60449	10.3142	14.2148
107.04	3.84839	4.39087	6.07715	7.61401	10.3352	14.2253
107.14	3.85107	4.38135	6.07983	7.60718	10.3167	14.2173
107.24	3.84814	4.38452	6.07056	7.60742	10.3206	14.2205
107.34	3.84741	4.38672	6.07739	7.61255	10.3313	14.2346
107.44	3.85645	4.39453	6.09155	7.62329	10.3352	14.2424
107.54	3.86035	4.38696	6.0874	7.6189	10.3323	14.2346
107.64	3.84717	4.38696	6.07983	7.61499	10.3337	14.2346
107.74	3.84814	4.38672	6.08228	7.6123	10.3335	14.2346
107.84	3.84692	4.39673	6.07739	7.62158	10.3428	14.2446
107.94	3.8562	4.38501	6.0979	7.62231	10.342	14.2444
108.04	3.84912	4.40381	6.08984	7.63037	10.353	14.2515
108.14	3.85327	4.39185	6.08765	7.61377	10.3442	14.2476
108.24	3.84839	4.39575	6.07861	7.62939	10.3513	14.2483
108.34	3.8562	4.4165	6.0874	7.63574	10.353	14.2617
108.44	3.85864	4.39697	6.09766	7.62109	10.3528	14.2539
108.54	3.85864	4.39453	6.08984	7.62793	10.3528	14.262
108.64	3.85864	4.40918	6.09302	7.63086	10.3528	14.2554
108.74	3.85864	4.40479	6.09302	7.62378	10.3528	14.2632
108.84	3.8584	4.40991	6.09131	7.64477	10.366	14.2834
108.94	3.86768	4.40039	6.09766	7.62622	10.3474	14.2676
109.04	3.85303	4.40356	6.08984	7.63818	10.3591	14.2615
109.14	3.85327	4.40991	6.09668	7.64331	10.3696	14.2825
109.24	3.86621	4.39819	6.09912	7.64624	10.3657	14.2783
109.34	3.86133	4.406	6.10181	7.64331	10.3735	14.2834
109.44	3.8584	4.40991	6.10303	7.6521	10.373	14.2756
109.54	3.86719	4.39819	6.1001	7.64331	10.3723	14.2827
109.64	3.8584	4.39429	6.09937	7.64868	10.3816	14.281
109.74	3.86377	4.39819	6.10449	7.65649	10.3774	14.2925
109.84	3.87134	4.40723	6.10449	7.65332	10.3757	14.2939
109.94	3.86841	4.39673	6.10303	7.64185	10.373	14.2952
110.04	3.85693	4.40747	6.09619	7.6604	10.3811	14.2925
110.14	3.87549	4.40991	6.09912	7.65112	10.3835	14.3018
110.24	3.86621	4.40674	6.10815	7.65991	10.3806	14.2988
110.34	3.86987	4.40552	6.11304	7.65869	10.3887	14.3105
110.44	3.87769	4.39673	6.10669	7.66162	10.3848	14.3057
110.54	3.86597	4.40942	6.09863	7.6626	10.3835	14.3135
110.64	3.86987	4.40942	6.11987	7.67041	10.3926	14.3301
110.74	3.875	4.41577	6.11841	7.67188	10.4011	14.3235
110.84	3.87744	4.4082	6.1106	7.66504	10.3936	14.3262
110.94	3.87866	4.41089	6.12231	7.67676	10.4004	14.3289
111.04	3.87378	4.41333	6.11841	7.67041	10.4026	14.3313
111.14	3.87378	4.41724	6.12476	7.66431	10.4028	14.3291
111.24	3.87671	4.42261	6.11987	7.67969	10.4197	14.3416
111.34	3.87769	4.4248	6.11816	7.67041	10.4143	14.3313
111.44	3.87769	4.42871	6.11572	7.67896	10.4048	14.343
111.54	3.87451	4.42871	6.12695	7.68188	10.4087	14.343
111.64	3.88672	4.44287	6.12988	7.67773	10.427	14.3569
111.74	3.89697	4.43042	6.1377	7.68091	10.4155	14.3445
111.84	3.87915	4.43799	6.12891	7.68579	10.4204	14.3638
111.94	3.89575	4.44043	6.1416	7.69214	10.4312	14.3545
112.04	3.88916	4.43359	6.13379	7.68066	10.4243	14.3455
112.14	3.8855	4.43652	6.12695	7.69116	10.4312	14.3638
112.24	3.89722	4.45337	6.14697	7.70142	10.4412	14.3623
112.34	3.89697	4.43506	6.14526	7.68994	10.4304	14.3596
112.44	3.8855	4.43628	6.12842	7.70142	10.4294	14.3625
112.54	3.88525	4.45434	6.13745	7.71167	10.4504	14.3833
112.64	3.90332	4.43774	6.1438	7.69507	10.4387	14.3677
112.74	3.89063	4.44556	6.14038	7.70117	10.4395	14.3801
112.84	3.88525	4.44775	6.14917	7.71045	10.4526	14.3855
112.94	3.89819	4.45288	6.14917	7.71167	10.449	14.384
113.04	3.89941	4.44385	6.15698	7.70776	10.4409	14.3792
113.14	3.88525	4.45337	6.14917	7.70947	10.459	14.3933
113.24	3.90332	4.44922	6.15552	7.70288	10.4517	14.3816
113.34	3.89038	4.45312	6.15063	7.71069	10.4524	14.3894
113.44	3.89429	4.45972	6.1582	7.72485	10.459	14.4028
113.54	3.90869	4.45679	6.16089	7.70386	10.4512	14.396
113.64	3.89771	4.4519	6.15796	7.71533	10.458	14.3958
113.74	3.89282	4.46484	6.15308	7.7207	10.4719	14.4089
113.84	3.91382	4.47266	6.15698	7.72363	10.4656	14.4236
113.94	3.90991	4.47388	6.17139	7.73267	10.4812	14.4246
114.04	3.90869	4.46582	6.1687	7.71558	10.469	14.4243
114.14	3.90845	4.47681	6.15771	7.71948	10.4719	14.4246
114.24	3.91504	4.4751	6.1687	7.72876	10.489	14.4387
114.34	3.92432	4.46875	6.18555	7.71973	10.4731	14.4338
114.44	3.90991	4.47754	6.16992	7.73267	10.4758	14.4365
114.54	3.91797	4.45801	6.17261	7.72461	10.4729	14.4246
114.64	3.91089	4.47266	6.16943	7.7207	10.4771	14.4324
114.74	3.91479	4.4751	6.16455	7.73877	10.4912	14.4441
114.84	3.91626	4.46582	6.18555	7.73096	10.488	14.437
114.94	3.91479	4.46973	6.17871	7.72876	10.4756	14.4456
115.04	3.91016	4.46484	6.17407	7.73144	10.4822	14.4453
115.14	3.90991	4.48413	6.18164	7.73633	10.4949	14.4556
115.24	3.92017	4.479	6.18652	7.74268	10.4927	14.4502
115.34	3.91504	4.47485	6.18018	7.73071	10.5	14.4502
115.44	3.90698	4.48682	6.17871	7.73779	10.499	14.4612
115.54	3.92578	4.479	6.18555	7.73389	10.4941	14.4573
115.64	3.90991	4.4751	6.18164	7.73218	10.491	14.4519
115.74	3.91626	4.47485	6.18018	7.75024	10.501	14.4727
115.84	3.92651	4.47485	6.19824	7.73071	10.4932	14.4658
115.94	3.90698	4.4751	6.17871	7.73779	10.4963	14.47
116.04	3.92163	4.49292	6.19336	7.75195	10.5103	14.4829
116.14	3.92798	4.47607	6.19971	7.73999	10.4961	14.4739
116.24	3.90991	4.48779	6.18774	7.76099	10.501	14.4866
116.34	3.92944	4.48901	6.19946	7.75415	10.5105	14.4839
116.44	3.91895	4.48096	6.19556	7.75146	10.5024	14.4829
116.54	3.91479	4.49438	6.19556	7.76098	10.5088	14.4832
116.64	3.92822	4.49731	6.19971	7.76489	10.521	14.4937
116.74	3.91772	4.48657	6.21045	7.76196	10.5103	14.4946
116.84	3.90845	4.48901	6.19971	7.75439	10.5127	14.4856
116.94	3.92017	4.49585	6.20093	7.75952	10.5195	14.4893
117.04	3.92261	4.49292	6.20752	7.75708	10.5166	14.5
117.14	3.91626	4.50586	6.20508	7.77124	10.5298	14.5139
117.24	3.91626	4.49243	6.21118	7.76807	10.5203	14.5007
117.34	3.91479	4.51098	6.21606	7.78808	10.5271	14.5085
117.44	3.92529	4.50586	6.21484	7.77246	10.5295	14.5039
117.54	3.90991	4.51758	6.20874	7.7749	10.5332	14.5234
117.64	3.92651	4.51367	6.22021	7.78882	10.5293	14.5217
117.74	3.92383	4.50586	6.21875	7.76953	10.5295	14.5127
117.84	3.91602	4.51758	6.20972	7.78808	10.5295	14.5232
117.94	3.92773	4.51367	6.21362	7.79077	10.5359	14.522
118.04	3.92407	4.50562	6.21533	7.78442	10.531	14.522
118.14	3.91626	4.51489	6.21802	7.79199	10.5388	14.5334
118.24	3.91626	4.51758	6.21899	7.79468	10.5334	14.5259
118.34	3.92554	4.5083	6.22534	7.79175	10.5383	14.522
118.44	3.9187	4.52393	6.21753	7.79053	10.5464	14.5337
118.54	3.91602	4.51343	6.22412	7.7998	10.5488	14.54
118.64	3.92529	4.52417	6.22656	7.79175	10.5425	14.531
118.74	3.92383	4.52515	6.22803	7.80859	10.5505	14.543
118.84	3.92773	4.52905	6.23999	7.80469	10.5615	14.5476
118.94	3.91846	4.54321	6.23315	7.81006	10.5603	14.553
119.04	3.93311	4.53296	6.24463	7.80786	10.5488	14.5479
119.14	3.92798	4.5354	6.23828	7.8125	10.5603	14.5515
119.24	3.93677	4.53442	6.23828	7.80225	10.5486	14.5583
119.34	3.92383	4.52661	6.23828	7.79834	10.5486	14.5544
119.44	3.92676	4.53125	6.23413	7.7981	10.5579	14.553
119.54	3.91577	4.53638	6.22632	7.81128	10.5601	14.5591
119.64	3.92749	4.53247	6.23804	7.81201	10.5508	14.5591
119.74	3.92456	4.53271	6.24585	7.7981	10.5547	14.5583
119.84	3.91211	4.53247	6.23413	7.81616	10.5654	14.5608
119.94	3.93286	4.5249	6.24438	7.79956	10.5615	14.5544
120.04	3.91748	4.5459	6.24878	7.81909	10.5732	14.574
120.14	3.91992	4.54443	6.24976	7.82153	10.5715	14.5786
120.24	3.93701	4.5271	6.25732	7.81226	10.5686	14.5708
120.34	3.91846	4.54297	6.24658	7.81933	10.5718	14.5725
120.44	3.92627	4.5498	6.24585	7.82153	10.5771	14.5894
120.54	3.93555	4.552	6.26294	7.82788	10.5793	14.5801
120.64	3.92383	4.54932	6.25342	7.823	10.5791	14.5776
120.74	3.92896	4.54541	6.26807	7.82129	10.5791	14.5762
120.84	3.92896	4.54639	6.26123	7.82129	10.5791	14.5808
120.94	3.91821	4.55444	6.26587	7.83301	10.5908	14.5801
121.04	3.93384	4.55591	6.26489	7.82764	10.5854	14.5891
121.14	3.92749	4.56128	6.26636	7.83716	10.6042	14.5918
121.24	3.92383	4.56909	6.27686	7.83472	10.604	14.5972
121.34	3.93848	4.55591	6.27026	7.83081	10.5908	14.5901
121.44	3.92749	4.55664	6.27515	7.83545	10.5994	14.594
121.54	3.92212	4.57275	6.28052	7.84106	10.6079	14.6089
121.64	3.93408	4.5752	6.27686	7.84741	10.6101	14.6152
121.74	3.9353	4.56738	6.28833	7.84082	10.6101	14.6128
121.84	3.9353	4.57202	6.28687	7.84839	10.6062	14.6135
121.94	3.93506	4.57104	6.28418	7.84839	10.6165	14.6292
122.04	3.93506	4.57398	6.2959	7.84204	10.6113	14.6123
122.14	3.93506	4.5752	6.28955	7.84717	10.6155	14.6111
122.24	3.93506	4.56323	6.29346	7.84839	10.6101	14.6201
122.34	3.93262	4.58423	6.28809	7.85766	10.6279	14.6343
122.44	3.94678	4.5918	6.30615	7.85889	10.6162	14.6277
122.54	3.93384	4.58276	6.29468	7.85645	10.623	14.6189
122.64	3.93286	4.57666	6.29346	7.86353	10.6233	14.6245
122.74	3.94067	4.58423	6.30151	7.85889	10.6099	14.6321
122.84	3.93384	4.58667	6.29468	7.87207	10.6279	14.6345
122.94	3.93921	4.59302	6.30762	7.87988	10.6387	14.6487
123.04	3.94678	4.58521	6.30762	7.86255	10.6201	14.6406
123.14	3.93506	4.5918	6.29565	7.86938	10.6292	14.6514
123.24	3.93872	4.59448	6.30737	7.87183	10.624	14.6421
123.34	3.93359	4.58813	6.29956	7.86157	10.6362	14.6436
123.44	3.93652	4.59277	6.29565	7.87817	10.6409	14.6602
123.54	3.93896	4.58496	6.31665	7.86255	10.6199	14.6443
123.64	3.92725	4.59961	6.30981	7.87744	10.6345	14.6475
123.74	3.93506	4.60596	6.30371	7.87964	10.6409	14.6616
123.84	3.94678	4.59448	6.31372	7.87354	10.6411	14.6555
123.94	3.9353	4.60596	6.30908	7.88232	10.6411	14.6633
124.04	3.93896	4.61133	6.31665	7.89136	10.658	14.6655
124.14	3.95605	4.59692	6.3269	7.87988	10.6436	14.6628
124.24	3.9375	4.6062	6.31934	7.89136	10.6409	14.6736
124.34	3.93896	4.61157	6.33081	7.89136	10.655	14.6694
124.44	3.95313	4.60596	6.33325	7.90063	10.6484	14.6787
124.54	3.94263	4.61475	6.33472	7.8938	10.6602	14.6833
124.64	3.95435	4.61377	6.32935	7.89771	10.6482	14.6794
124.74	3.94653	4.60352	6.32446	7.88916	10.6563	14.6709
124.84	3.93652	4.60327	6.32837	7.8877	10.6445	14.6694
124.94	3.94434	4.61743	6.32153	7.90063	10.6577	14.6904
125.04	3.95044	4.60278	6.33472	7.8938	10.6506	14.6755
125.14	3.93579	4.60205	6.31738	7.8938	10.6538	14.6694
125.24	3.94287	4.60205	6.33203	7.89917	10.6602	14.6875
125.34	3.94287	4.60498	6.33447	7.89307	10.6602	14.6829
125.44	3.93799	4.60596	6.32056	7.90063	10.6602	14.6904
125.54	3.95068	4.61377	6.33691	7.91089	10.677	14.6926
125.64	3.94653	4.60278	6.33447	7.90161	10.6624	14.6833
125.74	3.9436	4.6228	6.33447	7.90332	10.6665	14.6875
125.84	3.94678	4.61353	6.34644	7.90967	10.668	14.6887
125.94	3.94434	4.61353	6.33862	7.90698	10.6733	14.698
126.04	3.95459	4.61328	6.34106	7.90991	10.6692	14.6941
126.14	3.94019	4.61328	6.34521	7.91455	10.6716	14.7043
126.24	3.93872	4.61328	6.35791	7.90527	10.6685	14.6833
126.34	3.93579	4.61352	6.34082	7.90552	10.6638	14.698
126.44	3.93091	4.61328	6.34399	7.91846	10.6768	14.7107
126.54	3.9519	4.6228	6.35791	7.92798	10.6794	14.7124
126.64	3.94653	4.62231	6.34644	7.91724	10.6663	14.699
126.74	3.94507	4.62109	6.34326	7.9187	10.6816	14.7175
126.84	3.9519	4.6145	6.354	7.92163	10.6689	14.7134
126.94	3.94019	4.63428	6.33594	7.93457	10.6887	14.7161
127.04	3.95703	4.625	6.35571	7.92896	10.6794	14.7224
127.14	3.94678	4.63135	6.35034	7.93042	10.6963	14.7197
127.24	3.94678	4.63525	6.35815	7.93286	10.6934	14.7314
127.34	3.95825	4.63037	6.34863	7.92773	10.6853	14.7197
127.44	3.94653	4.63403	6.35254	7.93164	10.6882	14.7212
127.54	3.9541	4.625	6.34766	7.93652	10.675	14.7185
127.64	3.94653	4.6311	6.34375	7.94189	10.696	14.7317
127.74	3.94653	4.64966	6.35791	7.93799	10.7048	14.7485
127.84	3.9541	4.63501	6.36572	7.92896	10.6973	14.7302
127.94	3.94263	4.63257	6.35498	7.9397	10.6946	14.7393
128.04	3.94653	4.64185	6.354	7.94214	10.696	14.7407
128.14	3.94653	4.63794	6.354	7.93555	10.7039	14.7485
128.24	3.94653	4.63647	6.35693	7.94824	10.7046	14.7429
128.34	3.94653	4.64307	6.36572	7.93823	10.7063	14.7495
128.44	3.95581	4.63501	6.35791	7.94995	10.71	14.7534
128.54	3.96069	4.64184	6.36963	7.94971	10.7061	14.751
128.64	3.9541	4.64429	6.37744	7.94995	10.7061	14.7605
128.74	3.96069	4.64429	6.36597	7.94336	10.71	14.7566
128.84	3.95972	4.64429	6.37744	7.94824	10.7192	14.7612
128.94	3.94653	4.63477	6.36963	7.94824	10.7085	14.7612
129.04	3.9541	4.63232	6.35645	7.94727	10.7061	14.751
129.14	3.94629	4.64185	6.36328	7.94971	10.7153	14.772
129.24	3.95825	4.63501	6.37744	7.94043	10.7007	14.7534
129.34	3.94653	4.63892	6.3667	7.9458	10.7122	14.7585
129.44	3.95435	4.64014	6.37354	7.95898	10.7136	14.7766
129.54	3.96069	4.64307	6.37354	7.94336	10.7163	14.76
129.64	3.95581	4.6438	6.36694	7.95972	10.729	14.7703
129.74	3.95801	4.6438	6.37476	7.94946	10.7212	14.7717
129.84	3.95801	4.65039	6.36938	7.95752	10.7239	14.782
129.94	3.96362	4.65161	6.3772	7.94971	10.7253	14.7703
130.04	3.96606	4.65161	6.3772	7.96118	10.729	14.7791
130.14	3.96045	4.64404	6.37427	7.94971	10.7292	14.7783
130.24	3.95288	4.64551	6.36548	7.95093	10.7251	14.7813
130.34	3.95557	4.6416	6.37622	7.948	10.7251	14.782
130.44	3.94629	4.65601	6.36548	7.96143	10.7344	14.7939
130.54	3.95825	4.6543	6.38379	7.95874	10.729	14.7822
130.64	3.95581	4.65186	6.38525	7.96899	10.7368	14.7898
130.74	3.96606	4.6543	6.38525	7.96362	10.7485	14.8015
130.84	3.95654	4.65308	6.38525	7.96118	10.7368	14.7937
130.94	3.94629	4.66333	6.38501	7.96362	10.7432	14.8079
131.04	3.96045	4.66308	6.39282	7.97046	10.7498	14.8027
131.14	3.95557	4.66333	6.39941	7.97046	10.7458	14.8015
131.24	3.95557	4.66333	6.38892	7.98462	10.76	14.8108
131.34	3.96973	4.65405	6.40698	7.96338	10.7493	14.804
131.44	3.94849	4.66089	6.38721	7.97803	10.7441	14.8015
131.54	3.96021	4.66357	6.39258	7.96899	10.7444	14.8079
131.64	3.9541	4.66333	6.38501	7.979	10.7576	14.821
131.74	3.97485	4.66357	6.39673	7.97437	10.7422	14.8032
131.84	3.95947	4.66357	6.38818	7.98071	10.7485	14.8015
131.94	3.95801	4.67261	6.38916	7.98071	10.7546	14.8225
132.04	3.96973	4.66577	6.40723	7.9729	10.7559	14.8154
132.14	3.95801	4.66309	6.38745	7.98047	10.7559	14.8091
132.24	3.96558	4.6814	6.39282	7.98706	10.7678	14.8274
132.34	3.97217	4.67114	6.41406	7.98853	10.7622	14.8289
132.44	3.96582	4.67334	6.40869	7.98315	10.7583	14.8328
132.54	3.96826	4.66846	6.39917	7.98975	10.7651	14.8328
132.64	3.96313	4.66455	6.39673	7.98193	10.769	14.8223
132.74	3.96704	4.66309	6.39648	7.98022	10.7559	14.8271
132.84	3.95752	4.67261	6.39648	7.99072	10.7769	14.8406
132.94	3.97583	4.6748	6.39673	7.98047	10.7778	14.8418
133.04	3.96558	4.68115	6.40601	7.99731	10.7751	14.852
133.14	3.98267	4.67334	6.4043	7.99048	10.7659	14.8311
133.24	3.96777	4.67114	6.39502	7.98828	10.7766	14.8496
133.34	3.96558	4.68018	6.39673	7.98047	10.7673	14.8521
133.44	3.96558	4.67627	6.40308	7.98828	10.7751	14.8418
133.54	3.96558	4.6748	6.39429	8.00024	10.7871	14.8586
133.64	3.97754	4.68115	6.41406	7.99756	10.7754	14.8523
133.74	3.9751	4.67334	6.40845	7.99854	10.7751	14.8508
133.84	3.97583	4.68017	6.40698	8	10.7869	14.8574
133.94	3.97339	4.68237	6.40454	8.00903	10.7815	14.8599
134.04	3.96533	4.68262	6.41382	8.01172	10.7947	14.8718
134.14	3.98657	4.68408	6.42798	8.01318	10.7974	14.8716
134.24	3.97876	4.68115	6.42163	8.01001	10.7983	14.8716
134.34	3.97729	4.69433	6.41479	8.01147	10.7983	14.8833
134.44	3.99536	4.68237	6.42773	8.0022	10.7952	14.8713
134.54	3.97974	4.69018	6.41846	8.00513	10.7942	14.8791
134.64	3.97339	4.68213	6.42139	8.00757	10.7917	14.8792
134.74	3.98242	4.69409	6.41602	8.01147	10.8062	14.8896
134.84	3.98901	4.69165	6.42798	8.01782	10.7942	14.8911
134.94	3.98364	4.69263	6.41626	8.01782	10.802	14.8779
135.04	3.9834	4.70044	6.4209	8.01538	10.8125	14.8965
135.14	3.9812	4.68384	6.42407	8.0105	10.8074	14.8926
135.24	3.98413	4.69019	6.41772	8.01929	10.802	14.8987
135.34	3.98511	4.69165	6.42139	8.00732	10.8032	14.9001
135.44	3.98486	4.70605	6.42383	8.02563	10.8176	14.9146
135.54	3.98511	4.70044	6.43579	8.0271	10.8057	14.9092
135.64	3.98364	4.70435	6.43408	8.03076	10.8145	14.9128
135.74	3.98755	4.698	6.42627	8.02686	10.8228	14.9182
135.84	3.9812	4.68994	6.43164	8.02686	10.8252	14.9182
135.94	3.99048	4.70459	6.43311	8.03076	10.8188	14.9211
136.04	3.99023	4.6936	6.44067	8.03076	10.8235	14.9221
136.14	3.97705	4.69995	6.42749	8.0188	10.8171	14.9207
136.24	3.97681	4.70947	6.43677	8.03613	10.8228	14.9299
136.34	3.99121	4.70386	6.43555	8.0293	10.8274	14.9324
136.44	3.9873	4.69897	6.43799	8.01904	10.8342	14.9182
136.54	3.98242	4.70923	6.43384	8.03589	10.8325	14.9353
136.64	3.99243	4.72119	6.44312	8.05029	10.843	14.9497
136.74	3.99268	4.71338	6.45508	8.03857	10.8381	14.9353
136.84	3.97852	4.71362	6.43677	8.04248	10.8369	14.9458
136.94	3.99829	4.73047	6.44873	8.05029	10.854	14.9597
137.04	3.99683	4.72119	6.45898	8.05957	10.8484	14.9495
137.14	4.00317	4.71558	6.46509	8.05273	10.8508	14.9612
137.24	3.99902	4.73022	6.45728	8.05811	10.8506	14.9688
137.34	4.00439	4.73267	6.46265	8.05029	10.8521	14.9609
137.44	3.99268	4.73267	6.46411	8.06812	10.865	14.9727
137.54	4.00586	4.72485	6.47827	8.05176	10.8613	14.9548
137.64	4.00195	4.73267	6.46021	8.05811	10.856	14.9675
137.74	3.99658	4.71167	6.4729	8.05029	10.8528	14.9597
137.84	3.99341	4.73022	6.46509	8.06177	10.8557	14.9666
137.94	3.99634	4.72485	6.46631	8.05005	10.8533	14.9609
138.04	3.98462	4.72754	6.46387	8.05786	10.8638	14.969
138.14	4.00195	4.7312	6.47412	8.05493	10.8606	14.9805
138.24	3.99512	4.72876	6.47656	8.05396	10.8596	14.9805
138.34	3.98486	4.73266	6.46875	8.06714	10.8726	14.9805
138.44	3.99634	4.72363	6.48193	8.06323	10.8687	14.9805
138.54	3.98462	4.73242	6.47681	8.05786	10.8633	14.9802
138.64	3.99243	4.7207	6.4856	8.05786	10.8726	14.9805
138.74	3.9939	4.72461	6.47412	8.07886	10.8853	14.9805
138.84	4.00806	4.73877	6.49512	8.0813	10.8828	14.9976
138.94	4.00415	4.73096	6.49731	8.07837	10.8735	14.9907
139.04	3.99463	4.73779	6.49438	8.07715	10.8843	15.0063
139.14	4.00244	4.73267	6.49341	8.07739	10.8867	15
139.24	3.99243	4.73389	6.49365	8.07104	10.8828	15.0015
139.34	4.00317	4.72705	6.48706	8.07886	10.8828	14.9883
139.44	4.00391	4.74048	6.48315	8.0813	10.8828	15.0093
139.54	4.00415	4.73242	6.50366	8.07837	10.875	15.0024
139.64	3.99634	4.74023	6.49585	8.07349	10.8826	14.9998
139.74	4.00415	4.74023	6.4895	8.08521	10.8943	15.0178
[truncated: 2,204 more rows]
