# Supplementary material for: Targeted protein degradation by KLHDC2 ligands identified by high-throughput screening
Source: eLife. 2025 Jun 16;14:RP106844. doi: 10.7554/eLife.106844 (PMC12169847; doi:10.7554/eLife.106844)
Supplement: Figure 4—source data 1. [file elife-106844-fig4-data1.xlsx]

## Sheet: Figure 4C
nM	dBET1			7			8
20000	0.316372	0.267699	0.373156	0.356932	0.316372	0.332596	0.228162	0.202454	0.22602
6666.67	0.227139	0.19469	0.19469	0.373156	0.397493	0.446165	0.176746	0.163891	0.186386
2222.22	0.170354	0.275811	0.210914	0.738201	0.584071	0.713864	0.188529	0.143539	0.204596
740.741	0.227139	0.186578	0.219027	0.754425	0.770649	0.85177	0.26244	0.203525	0.231376
246.914	0.275811	0.324484	0.227139	0.965339	0.867994	0.941003	0.296718	0.356705	0.473464
82.3045	0.373156	0.397493	0.292035	0.981563	0.932891	0.924779	0.690914	0.603077	0.42526
27.4348	0.478614	0.559735	0.567847	0.924779	1.01401	0.997788	0.622359	0.977992	0.621287
9.14495	0.770649	0.721976	0.876106	0.949115	0.778761	0.876106	0.856948	0.490603	0.845165
3.04832	0.876106	0.803097	0.794985	0.876106	0.957227	0.949115	0.969423	0.730548	0.809816
1.01611	1.01401	0.843658	0.884218	0.986252	1.24115	1.01235	1.42146	0.682345	1.05726
0.338702	0.900442	1.06268	0.932891	1.01401	0.884218	1.10325	0.941572	0.769111	0.86766

## Sheet: Figure 4D
nM	dBET1			7			8
20000				0.187457	0.131756	0.130685	0.228162	0.202454	0.22602
6666.67	1.17295	0.882657	0.874087	0.177817	0.169247	0.178888	0.176746	0.163891	0.186386
2222.22	1.24686	1.09154	1.26186	0.847307	0.85909	0.954426	0.188529	0.143539	0.204596
740.741	1.14403	0.968351	1.3754	1.23401	1.1783	1.43003	0.26244	0.203525	0.231376
246.914	0.790535	1.05833		0.889084	0.866589	0.92229	0.296718	0.356705	0.473464
82.3045	1.33363	0.931931	1.01227	0.858019	0.875158	0.945856	0.690914	0.603077	0.42526
27.4348	1.16331	0.915863	1.25222	0.789463	0.769111	1.0519	0.622359	0.977992	0.621287
9.14495	0.895511	1.29185	1.249	0.69627	0.929789	0.774467	0.856948	0.490603	0.845165
3.04832	0.953355	0.826955	1.04333	0.688772	0.705911	0.750901	0.969423	0.730548	0.809816
1.01611	1.1376	0.626643	0.70484	0.690914	0.814101	0.792677	1.42146	0.682345	1.05726
0.338702	0.931931	0.90408	0.748758	1.47823	0.726264	0.765897	0.941572	0.769111	0.86766
