# Supplementary figures and images for: Targeted protein degradation by KLHDC2 ligands identified by high-throughput screening
Source: eLife journal article supplement (doi:10.7554/elife.106844), 2025-05-09

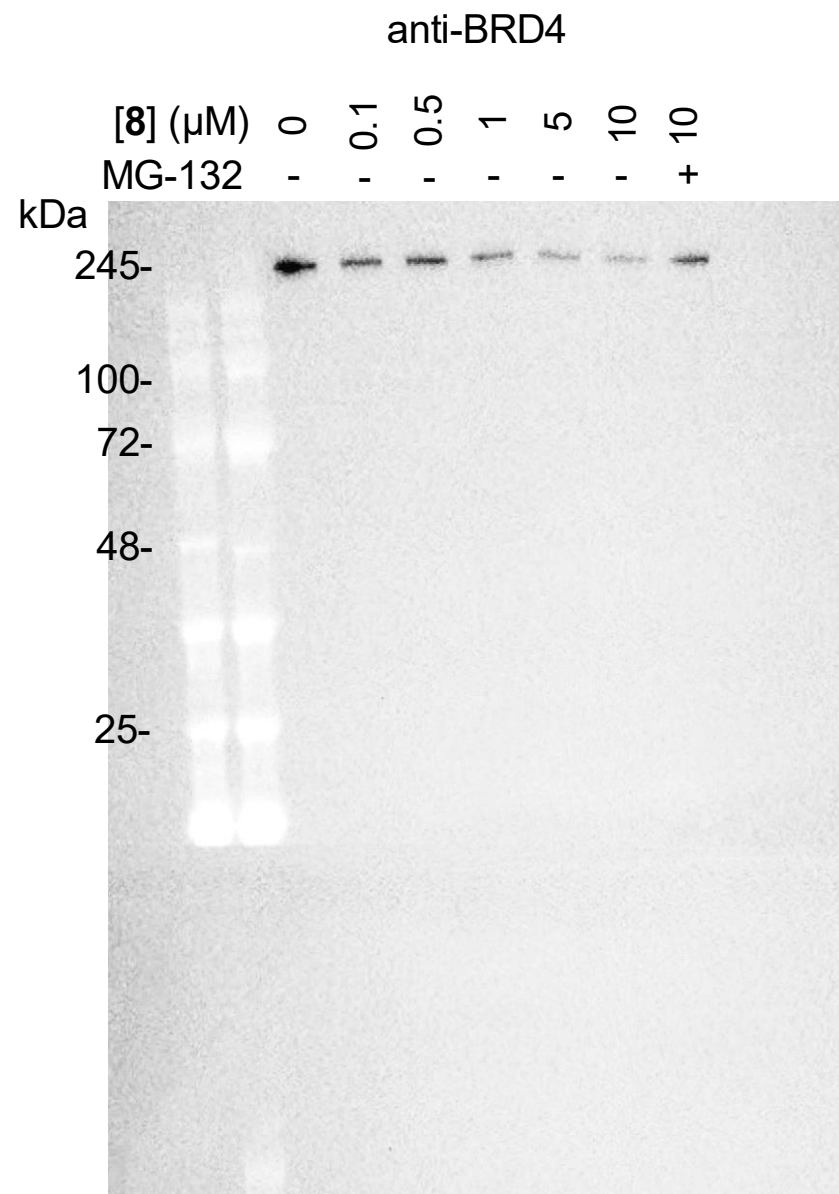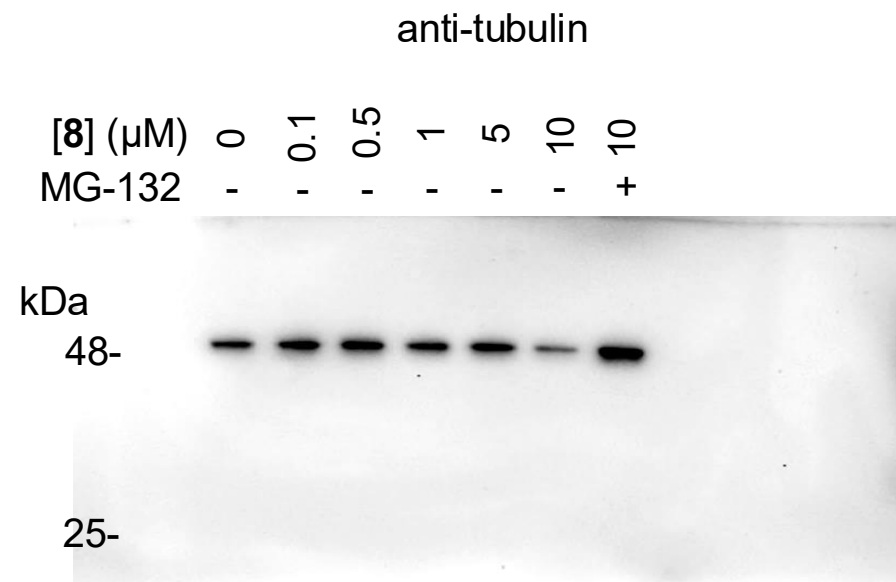

Supplement: fig4-data2 [file elife-106844-fig4-data2-v1.zip]
